# Supplementary material for: A new permanent, low-cost, low-power SO2 camera for continuous measurement of volcanic emissions
Source: Frontiers journal article supplement (doi:10.3389/feart.2023.1088992), 2023-04-04
Supplement: Table_1.xlsx [file Table_1.xlsx]

## Sheet: flow_glob LD corrected
Date/Time [UTC]	_phi [g/s]	_phi_err	_velo_eff	_velo_eff_err	_frac_optflow_ok	_frac_optflow_ok_ica
2022-05-20 16:05:15	3790.3		7.0331	0
2022-05-20 16:05:20	3636.82		7.0331	0
2022-05-20 16:05:25	3683.72		7.0331	0
2022-05-20 16:05:30	3488.85		7.0331	0
2022-05-20 16:05:35	3648.07		7.0331	0
2022-05-20 16:05:40	3339.71		7.0331	0
2022-05-20 16:05:45	3510.86		7.0331	0
2022-05-20 16:05:50	3535.6		7.0331	0
2022-05-20 16:05:55	3347.37		7.0331	0
2022-05-20 16:06:00	3269.07		7.0331	0
2022-05-20 16:06:05	3120.86		7.0331	0
2022-05-20 16:06:10	3059.19		7.0331	0
2022-05-20 16:06:15	3071.88		7.0331	0
2022-05-20 16:06:20	3009.89		7.0331	0
2022-05-20 16:06:25	2605.38		7.0331	0
2022-05-20 16:06:30	2354.06		7.0331	0
2022-05-20 16:06:35	2243.23		7.0331	0
2022-05-20 16:06:40	2357.91		7.0331	0
2022-05-20 16:06:45	2478.7		7.0331	0
2022-05-20 16:06:50	2506.49		7.0331	0
2022-05-20 16:06:55	2753.54		7.0331	0
2022-05-20 16:07:00	2867.42		7.0331	0
2022-05-20 16:07:05	2862.32		7.0331	0
2022-05-20 16:07:10	3184		7.0331	0
2022-05-20 16:07:15	3300.06		7.0331	0
2022-05-20 16:07:20	3382.47		7.0331	0
2022-05-20 16:07:25	3698.16		7.0331	0
2022-05-20 16:07:30	3899.99		7.0331	0
2022-05-20 16:07:35	4262.39		7.0331	0
2022-05-20 16:07:40	4232.81		7.0331	0
2022-05-20 16:07:45	4223.85		7.0331	0
2022-05-20 16:07:50	4095.5		7.0331	0
2022-05-20 16:07:55	3978.28		7.0331	0
2022-05-20 16:08:00	3712.59		7.0331	0
2022-05-20 16:08:05	3565.53		7.0331	0
2022-05-20 16:08:10	3399.28		7.0331	0
2022-05-20 16:08:15	3074.59		7.0331	0
2022-05-20 16:08:20	2842.68		7.0331	0
2022-05-20 16:08:25	2627.32		7.0331	0
2022-05-20 16:08:30	2520.2		7.0331	0
2022-05-20 16:08:35	2814.02		7.0331	0
2022-05-20 16:08:40	2930.67		7.0331	0
2022-05-20 16:08:45	3123.99		7.0331	0
2022-05-20 16:08:50	3239.35		7.0331	0
2022-05-20 16:08:55	3307.61		7.0331	0
2022-05-20 16:09:00	3415.25		7.0331	0
2022-05-20 16:09:05	3537		7.0331	0
2022-05-20 16:09:10	3509.65		7.0331	0
2022-05-20 16:09:15	3260.25		7.0331	0
2022-05-20 16:09:20	2982.07		7.0331	0
2022-05-20 16:09:25	2856.93		7.0331	0
2022-05-20 16:09:30	2682.32		7.0331	0
2022-05-20 16:09:35	2567.2		7.0331	0
2022-05-20 16:09:40	2916.65		7.0331	0
2022-05-20 16:09:45	2882.26		7.0331	0
2022-05-20 16:09:50	3047.13		7.0331	0
2022-05-20 16:09:55	2956.19		7.0331	0
2022-05-20 16:10:00	2996.77		7.0331	0
2022-05-20 16:10:05	3060.85		7.0331	0
2022-05-20 16:10:10	3178.15		7.0331	0
2022-05-20 16:10:15	3618.89		7.0331	0
2022-05-20 16:10:20	3899.84		7.0331	0
2022-05-20 16:10:25	3679.67		7.0331	0
2022-05-20 16:10:30	3014.26		7.0331	0
2022-05-20 16:10:35	2866.08		7.0331	0
2022-05-20 16:10:40	2875.75		7.0331	0
2022-05-20 16:10:45	2890.55		7.0331	0
2022-05-20 16:10:50	2879.67		7.0331	0
2022-05-20 16:10:55	3649.73		7.0331	0
2022-05-20 16:11:00	3870.8		7.0331	0
2022-05-20 16:11:05	3849.87		7.0331	0
2022-05-20 16:11:10	3806.24		7.0331	0
2022-05-20 16:11:15	3829.07		7.0331	0
2022-05-20 16:11:20	3536.67		7.0331	0
2022-05-20 16:11:25	3426.58		7.0331	0
2022-05-20 16:11:30	3373.63		7.0331	0
2022-05-20 16:11:35	3430.99		7.0331	0
2022-05-20 16:11:40	3484.74		7.0331	0
2022-05-20 16:11:45	3411.61		7.0331	0
2022-05-20 16:11:50	2860.29		7.0331	0
2022-05-20 16:11:55	2706.05		7.0331	0
2022-05-20 16:12:00	2823.39		7.0331	0
2022-05-20 16:12:05	2400.66		7.0331	0
2022-05-20 16:12:10	1974.52		7.0331	0
2022-05-20 16:12:15	1763.54		7.0331	0
2022-05-20 16:12:20	1685.75		7.0331	0
2022-05-20 16:12:25	1526.28		7.0331	0
2022-05-20 16:12:30	1729.01		7.0331	0
2022-05-20 16:12:35	2304.86		7.0331	0
2022-05-20 16:12:40	2390.94		7.0331	0
2022-05-20 16:12:45	2732.93		7.0331	0
2022-05-20 16:12:50	2981.77		7.0331	0
2022-05-20 16:12:55	3297.33		7.0331	0
2022-05-20 16:13:00	3446.04		7.0331	0
2022-05-20 16:13:05	3184.86		7.0331	0
2022-05-20 16:13:10	3016.93		7.0331	0
2022-05-20 16:13:15	2794.49		7.0331	0
2022-05-20 16:13:20	2947.97		7.0331	0
2022-05-20 16:13:25	3002.56		7.0331	0
2022-05-20 16:13:30	2980.16		7.0331	0
2022-05-20 16:13:35	3002.92		7.0331	0
2022-05-20 16:13:40	2935.53		7.0331	0
2022-05-20 16:13:45	2882.55		7.0331	0
2022-05-20 16:13:50	2790.27		7.0331	0
2022-05-20 16:13:55	2434.3		7.0331	0
2022-05-20 16:14:05	2281.18		7.0331	0
2022-05-20 16:14:10	2271.42		7.0331	0
2022-05-20 16:14:15	2356.83		7.0331	0
2022-05-20 16:14:20	2460.33		7.0331	0
2022-05-20 16:14:25	2574.08		7.0331	0
2022-05-20 16:14:30	2458.32		7.0331	0
2022-05-20 16:14:35	2241.71		7.0331	0
2022-05-20 16:14:40	2156.48		7.0331	0
2022-05-20 16:14:45	2166.58		7.0331	0
2022-05-20 16:14:50	2078.78		7.0331	0
2022-05-20 16:14:55	2153.94		7.0331	0
2022-05-20 16:15:00	2257.33		7.0331	0
2022-05-20 16:15:05	2538.74		7.0331	0
2022-05-20 16:15:10	2815.66		7.0331	0
2022-05-20 16:15:15	2864.33		7.0331	0
2022-05-20 16:15:20	2872.82		7.0331	0
2022-05-20 16:15:25	2762.93		7.0331	0
2022-05-20 16:15:30	2486.06		7.0331	0
2022-05-20 16:15:35	2601.35		7.0331	0
2022-05-20 16:15:40	2718.87		7.0331	0
2022-05-20 16:15:45	2841.34		7.0331	0
2022-05-20 16:15:50	3542.71		7.0331	0
2022-05-20 16:15:55	3454.61		7.0331	0
2022-05-20 16:16:00	3381.41		7.0331	0
2022-05-20 16:16:05	3474.61		7.0331	0
2022-05-20 16:16:10	3634.71		7.0331	0
2022-05-20 16:16:15	3551.17		7.0331	0
2022-05-20 16:16:20	3689.72		7.0331	0
2022-05-20 16:16:25	3992.34		7.0331	0
2022-05-20 16:16:30	3675.63		7.0331	0
2022-05-20 16:16:35	3307.2		7.0331	0
2022-05-20 16:16:40	3228.35		7.0331	0
2022-05-20 16:16:45	2974.12		7.0331	0
2022-05-20 16:16:50	2915.48		7.0331	0
2022-05-20 16:16:55	2875.51		7.0331	0
2022-05-20 16:17:00	2925.79		7.0331	0
2022-05-20 16:17:05	3210.42		7.0331	0
2022-05-20 16:17:10	3450.58		7.0331	0
2022-05-20 16:17:15	3287.01		7.0331	0
2022-05-20 16:17:20	3259.68		7.0331	0
2022-05-20 16:17:25	2950.78		7.0331	0
2022-05-20 16:17:30	2799.77		7.0331	0
2022-05-20 16:17:35	2633.68		7.0331	0
2022-05-20 16:17:40	2603.45		7.0331	0
2022-05-20 16:17:45	2431.05		7.0331	0
2022-05-20 16:17:50	2119.51		7.0331	0
2022-05-20 16:17:55	1913.67		7.0331	0
2022-05-20 16:18:00	1858.55		7.0331	0
2022-05-20 16:18:05	1957.5		7.0331	0
2022-05-20 16:18:10	2008.62		7.0331	0
2022-05-20 16:18:15	2196.81		7.0331	0
2022-05-20 16:18:20	2463.94		7.0331	0
2022-05-20 16:18:25	2978.23		7.0331	0
2022-05-20 16:18:30	3056.98		7.0331	0
2022-05-20 16:18:35	3161.21		7.0331	0
2022-05-20 16:18:40	3165.81		7.0331	0
2022-05-20 16:18:45	3146.82		7.0331	0
2022-05-20 16:18:50	3224.09		7.0331	0
2022-05-20 16:18:55	3180.1		7.0331	0
2022-05-20 16:19:00	3247.04		7.0331	0
2022-05-20 16:19:05	3182.37		7.0331	0
2022-05-20 16:19:10	3445.38		7.0331	0
2022-05-20 16:19:15	3430.64		7.0331	0
2022-05-20 16:19:20	2933.95		7.0331	0
2022-05-20 16:19:25	2793.23		7.0331	0
2022-05-20 16:19:30	2690.3		7.0331	0
2022-05-20 16:19:35	2939.85		7.0331	0
2022-05-20 16:19:40	3265.94		7.0331	0
2022-05-20 16:19:45	3395.98		7.0331	0
2022-05-20 16:19:50	3079.31		7.0331	0
2022-05-20 16:19:55	3089.79		7.0331	0
2022-05-20 16:20:00	3442.84		7.0331	0
2022-05-20 16:20:05	3024.72		7.0331	0
2022-05-20 16:20:10	2602.59		7.0331	0
2022-05-20 16:20:15	2153.97		7.0331	0
2022-05-20 16:20:20	1789.71		7.0331	0
2022-05-20 16:20:25	1992.59		7.0331	0
2022-05-20 16:20:30	2343.03		7.0331	0
2022-05-20 16:20:35	2231.63		7.0331	0
2022-05-20 16:20:40	2545.58		7.0331	0
2022-05-20 16:20:45	2891.74		7.0331	0
2022-05-20 16:20:50	3217.57		7.0331	0
2022-05-20 16:20:55	3174.57		7.0331	0
2022-05-20 16:21:00	3713.11		7.0331	0
2022-05-20 16:21:05	3707.47		7.0331	0
2022-05-20 16:21:10	3560.66		7.0331	0
2022-05-20 16:21:15	3604.59		7.0331	0
2022-05-20 16:21:20	3801.71		7.0331	0
2022-05-20 16:21:25	3859.39		7.0331	0
2022-05-20 16:21:30	3779.37		7.0331	0
2022-05-20 16:21:35	4043.99		7.0331	0
2022-05-20 16:21:40	3890.71		7.0331	0
2022-05-20 16:21:45	3895.38		7.0331	0
2022-05-20 16:21:50	3778.12		7.0331	0
2022-05-20 16:21:55	3654.51		7.0331	0
2022-05-20 16:22:00	3855.04		7.0331	0
2022-05-20 16:22:05	3712.33		7.0331	0
2022-05-20 16:22:10	3600.69		7.0331	0
2022-05-20 16:22:15	3911.02		7.0331	0
2022-05-20 16:22:20	3549.82		7.0331	0
2022-05-20 16:22:25	3209.43		7.0331	0
2022-05-20 16:22:30	3118.99		7.0331	0
2022-05-20 16:22:35	3150.2		7.0331	0
2022-05-20 16:22:40	3177.99		7.0331	0
2022-05-20 16:22:45	3418.38		7.0331	0
2022-05-20 16:22:50	3542.9		7.0331	0
2022-05-20 16:22:55	3851.35		7.0331	0
2022-05-20 16:23:00	3860.8		7.0331	0
2022-05-20 16:23:05	4051.8		7.0331	0
2022-05-20 16:23:10	4219.53		7.0331	0
2022-05-20 16:23:15	4085.46		7.0331	0
2022-05-20 16:23:20	3844.16		7.0331	0
2022-05-20 16:23:25	3513.75		7.0331	0
2022-05-20 16:23:30	3197.62		7.0331	0
2022-05-20 16:23:35	3384		7.0331	0
2022-05-20 16:23:40	3349.85		7.0331	0
2022-05-20 16:23:45	3507.67		7.0331	0
2022-05-20 16:23:50	3199.58		7.0331	0
2022-05-20 16:23:55	3161.25		7.0331	0
2022-05-20 16:24:00	3322.16		7.0331	0
2022-05-20 16:24:05	3168.88		7.0331	0
2022-05-20 16:24:10	2849.66		7.0331	0
2022-05-20 16:24:15	2897.63		7.0331	0
2022-05-20 16:24:20	2873.15		7.0331	0
2022-05-20 16:24:25	2930.5		7.0331	0
2022-05-20 16:24:30	2880.78		7.0331	0
2022-05-20 16:24:35	2758.13		7.0331	0
2022-05-20 16:24:40	2847.52		7.0331	0
2022-05-20 16:24:45	2920.89		7.0331	0
2022-05-20 16:24:50	3487.22		7.0331	0
2022-05-20 16:24:55	4081.97		7.0331	0
2022-05-20 16:25:00	4286.21		7.0331	0
2022-05-20 16:25:05	4619.22		7.0331	0
2022-05-20 16:25:10	4904.07		7.0331	0
2022-05-20 16:25:15	5027.01		7.0331	0
2022-05-20 16:25:20	5425.92		7.0331	0
2022-05-20 16:25:25	5459.06		7.0331	0
2022-05-20 16:25:30	5160.72		7.0331	0
2022-05-20 16:25:35	5024.43		7.0331	0
2022-05-20 16:25:40	5083.47		7.0331	0
2022-05-20 16:25:45	5578.09		7.0331	0
2022-05-20 16:25:50	5465.06		7.0331	0
2022-05-20 16:25:55	5253.86		7.0331	0
2022-05-20 16:26:00	4873.23		7.0331	0
2022-05-20 16:26:05	4470.74		7.0331	0
2022-05-20 16:26:10	3915.07		7.0331	0
2022-05-20 16:26:15	3314.7		7.0331	0
2022-05-20 16:26:20	3036.13		7.0331	0
2022-05-20 16:26:25	3606.84		7.0331	0
2022-05-20 16:26:30	3891.22		7.0331	0
2022-05-20 16:26:35	4000.24		7.0331	0
2022-05-20 16:26:40	4056.03		7.0331	0
2022-05-20 16:26:45	3947.82		7.0331	0
2022-05-20 16:26:50	3733.56		7.0331	0
2022-05-20 16:26:55	3709.02		7.0331	0
2022-05-20 16:27:00	3790.46		7.0331	0
2022-05-20 16:27:05	3872.94		7.0331	0
2022-05-20 16:27:10	3649.26		7.0331	0
2022-05-20 16:27:15	3462.31		7.0331	0
2022-05-20 16:27:20	3402.97		7.0331	0
2022-05-20 16:27:25	3493.84		7.0331	0
2022-05-20 16:27:30	3472.77		7.0331	0
2022-05-20 16:27:35	3379.38		7.0331	0
2022-05-20 16:27:40	3038.22		7.0331	0
2022-05-20 16:27:45	2583.05		7.0331	0
2022-05-20 16:27:50	2423.58		7.0331	0
2022-05-20 16:27:55	2707.45		7.0331	0
2022-05-20 16:28:00	3021.85		7.0331	0
2022-05-20 16:28:05	3140.64		7.0331	0
2022-05-20 16:28:10	3496.05		7.0331	0
2022-05-20 16:28:15	3688.44		7.0331	0
2022-05-20 16:28:20	3599.12		7.0331	0
2022-05-20 16:28:25	3442.41		7.0331	0
2022-05-20 16:28:30	3555.17		7.0331	0
2022-05-20 16:28:35	3817.99		7.0331	0
2022-05-20 16:28:40	4080.61		7.0331	0
2022-05-20 16:28:45	4092.05		7.0331	0
2022-05-20 16:28:50	4220.67		7.0331	0
2022-05-20 16:28:55	4334.1		7.0331	0
2022-05-20 16:29:00	4404.29		7.0331	0
2022-05-20 16:29:05	3966.15		7.0331	0
2022-05-20 16:29:10	3736.19		7.0331	0
2022-05-20 16:29:15	3743.97		7.0331	0
2022-05-20 16:29:20	3382.41		7.0331	0
2022-05-20 16:29:25	3198.61		7.0331	0
2022-05-20 16:29:30	2752.94		7.0331	0
2022-05-20 16:29:35	2648.38		7.0331	0
2022-05-20 16:29:40	2536.18		7.0331	0
2022-05-20 16:29:45	2653.61		7.0331	0
2022-05-20 16:29:50	2848.37		7.0331	0
2022-05-20 16:29:55	3033.53		7.0331	0
2022-05-20 16:30:00	3223.82		7.0331	0
2022-05-20 16:30:05	3106.98		7.0331	0
2022-05-20 16:30:10	3485.92		7.0331	0
2022-05-20 16:30:15	3854.34		7.0331	0
2022-05-20 16:30:20	4055.88		7.0331	0
2022-05-20 16:30:25	4068.18		7.0331	0
2022-05-20 16:30:30	4047.12		7.0331	0
2022-05-20 16:30:35	3637.84		7.0331	0
2022-05-20 16:30:40	3384.64		7.0331	0
2022-05-20 16:30:45	3320.59		7.0331	0
2022-05-20 16:30:50	3297.12		7.0331	0
2022-05-20 16:30:55	3095.06		7.0331	0
2022-05-20 16:31:00	2919.43		7.0331	0
2022-05-20 16:31:05	2692.39		7.0331	0
2022-05-20 16:31:10	2453.45		7.0331	0
2022-05-20 16:31:15	2309.29		7.0331	0
2022-05-20 16:31:20	2434.18		7.0331	0
2022-05-20 16:31:25	2287.98		7.0331	0
2022-05-20 16:31:30	2302.65		7.0331	0
2022-05-20 16:31:35	3048.51		7.0331	0
2022-05-20 16:31:40	3651.37		7.0331	0
2022-05-20 16:31:45	3776.15		7.0331	0
2022-05-20 16:31:50	3948.57		7.0331	0
2022-05-20 16:31:55	4394.09		7.0331	0
2022-05-20 16:32:00	4333.86		7.0331	0
2022-05-20 16:32:05	4566.57		7.0331	0
2022-05-20 16:32:10	4774.81		7.0331	0
2022-05-20 16:32:15	4347.01		7.0331	0
2022-05-20 16:32:20	4367.88		7.0331	0
2022-05-20 16:32:25	4319.33		7.0331	0
2022-05-20 16:32:30	4263.3		7.0331	0
2022-05-20 16:32:35	3946.33		7.0331	0
2022-05-20 16:32:40	3781.77		7.0331	0
2022-05-20 16:32:45	3480.19		7.0331	0
2022-05-20 16:32:50	3788.42		7.0331	0
2022-05-20 16:32:55	4013.53		7.0331	0
2022-05-20 16:33:00	4198.35		7.0331	0
2022-05-20 16:33:05	4474.91		7.0331	0
2022-05-20 16:33:10	5136.69		7.0331	0
2022-05-20 16:33:15	4799.2		7.0331	0
2022-05-20 16:33:20	4683.43		7.0331	0
2022-05-20 16:33:25	4694.8		7.0331	0
2022-05-20 16:33:30	4448.87		7.0331	0
2022-05-20 16:33:35	4370.71		7.0331	0
2022-05-20 16:33:40	3963.35		7.0331	0
2022-05-20 16:33:45	4467.62		7.0331	0
2022-05-20 16:33:50	4578.64		7.0331	0
2022-05-20 16:33:55	4937.2		7.0331	0
2022-05-20 16:34:00	5165.21		7.0331	0
2022-05-20 16:34:05	5827.28		7.0331	0
2022-05-20 16:34:10	5967.39		7.0331	0
2022-05-20 16:34:15	6018.14		7.0331	0
2022-05-20 16:34:20	6030.11		7.0331	0
2022-05-20 16:34:25	6009.92		7.0331	0
2022-05-20 16:34:30	5974.03		7.0331	0
2022-05-20 16:34:35	5694.28		7.0331	0
2022-05-20 16:34:40	5495.6		7.0331	0
2022-05-20 16:34:45	5526.41		7.0331	0
2022-05-20 16:34:50	5550.37		7.0331	0
2022-05-20 16:35:05	5629.25		7.0331	0
2022-05-20 16:35:10	5883.15		7.0331	0
2022-05-20 16:35:15	6589.18		7.0331	0
2022-05-20 16:35:20	6825.83		7.0331	0
2022-05-20 16:35:25	7247.44		7.0331	0
2022-05-20 16:35:30	7480.16		7.0331	0
2022-05-20 16:35:35	7420.97		7.0331	0
2022-05-20 16:35:40	7270.63		7.0331	0
2022-05-20 16:35:45	6914.66		7.0331	0
2022-05-20 16:35:50	6895.91		7.0331	0
2022-05-20 16:35:55	6753.7		7.0331	0
2022-05-20 16:36:00	6946		7.0331	0
2022-05-20 16:36:05	6647.66		7.0331	0
2022-05-20 16:36:10	6218.39		7.0331	0
2022-05-20 16:36:15	5861.15		7.0331	0
2022-05-20 16:36:20	5090.38		7.0331	0
2022-05-20 16:36:25	4623.94		7.0331	0
2022-05-20 16:36:30	4347.59		7.0331	0
2022-05-20 16:36:35	3994.35		7.0331	0
2022-05-20 16:36:40	3914.47		7.0331	0
2022-05-20 16:36:45	4146.66		7.0331	0
2022-05-20 16:36:50	4860.23		7.0331	0
2022-05-20 16:36:55	5625.68		7.0331	0
2022-05-20 16:37:00	6288.58		7.0331	0
2022-05-20 16:37:05	6526.03		7.0331	0
2022-05-20 16:37:10	6516.63		7.0331	0
2022-05-20 16:37:15	6744.55		7.0331	0
2022-05-20 16:37:20	6719.35		7.0331	0
2022-05-20 16:37:25	6188.85		7.0331	0
2022-05-20 16:37:30	5867.11		7.0331	0
2022-05-20 16:37:35	5313.17		7.0331	0
2022-05-20 16:37:40	4921.03		7.0331	0
2022-05-20 16:37:45	4710.76		7.0331	0
2022-05-20 16:37:50	4046.25		7.0331	0
2022-05-20 16:37:55	3713.07		7.0331	0
2022-05-20 16:38:00	3658.76		7.0331	0
2022-05-20 16:38:05	3620.39		7.0331	0
2022-05-20 16:38:10	3662.64		7.0331	0
2022-05-20 16:38:15	3557.35		7.0331	0
2022-05-20 16:38:20	3369.11		7.0331	0
2022-05-20 16:38:25	4610.39		7.0331	0
2022-05-20 16:38:30	5750.9		7.0331	0
2022-05-20 16:38:35	6440.26		7.0331	0
2022-05-20 16:38:40	6802.34		7.0331	0
2022-05-20 16:38:45	7477.71		7.0331	0
2022-05-20 16:38:50	8050.99		7.0331	0
2022-05-20 16:38:55	8300.19		7.0331	0
2022-05-20 16:39:00	8601.76		7.0331	0
2022-05-20 16:39:05	8539.33		7.0331	0
2022-05-20 16:39:10	8630.3		7.0331	0
2022-05-20 16:39:15	8287.15		7.0331	0
2022-05-20 16:39:20	8081.5		7.0331	0
2022-05-20 16:39:25	7843.27		7.0331	0
2022-05-20 16:39:30	7543.83		7.0331	0
2022-05-20 16:39:35	7313.6		7.0331	0
2022-05-20 16:39:40	6370.58		7.0331	0
2022-05-20 16:39:45	6290.75		7.0331	0
2022-05-20 16:39:50	6122.98		7.0331	0
2022-05-20 16:39:55	5742.01		7.0331	0
2022-05-20 16:40:00	5748.95		7.0331	0
2022-05-20 16:40:05	4777.25		7.0331	0
2022-05-20 16:40:10	3576.1		7.0331	0
2022-05-20 16:40:15	2937.78		7.0331	0
2022-05-20 16:40:20	2915.08		7.0331	0
2022-05-20 16:40:25	2972.1		7.0331	0
2022-05-20 16:40:30	3681.35		7.0331	0
2022-05-20 16:40:35	3569.02		7.0331	0
2022-05-20 16:40:40	3548.8		7.0331	0
2022-05-20 16:40:45	3692.39		7.0331	0
2022-05-20 16:40:50	3659.76		7.0331	0
2022-05-20 16:40:55	3626		7.0331	0
2022-05-20 16:41:00	3575.19		7.0331	0
2022-05-20 16:41:05	4012.78		7.0331	0
2022-05-20 16:41:10	3897.38		7.0331	0
2022-05-20 16:41:15	3598.18		7.0331	0
2022-05-20 16:41:20	3338.7		7.0331	0
2022-05-20 16:41:25	3330.91		7.0331	0
2022-05-20 16:41:30	3386.9		7.0331	0
2022-05-20 16:41:35	3601.71		7.0331	0
2022-05-20 16:41:40	3593.57		7.0331	0
2022-05-20 16:41:45	3149.31		7.0331	0
2022-05-20 16:41:50	3315.94		7.0331	0
2022-05-20 16:41:55	3421.44		7.0331	0
2022-05-20 16:42:00	3355.25		7.0331	0
2022-05-20 16:42:05	3216.43		7.0331	0
2022-05-20 16:42:10	3177.02		7.0331	0
2022-05-20 16:42:15	3235.79		7.0331	0
2022-05-20 16:42:20	3169.94		7.0331	0
2022-05-20 16:42:25	3276.04		7.0331	0
2022-05-20 16:42:30	3241.28		7.0331	0
2022-05-20 16:42:35	3082.1		7.0331	0
2022-05-20 16:42:40	3016.35		7.0331	0
2022-05-20 16:42:45	3044.97		7.0331	0
2022-05-20 16:42:50	3534.54		7.0331	0
2022-05-20 16:42:55	3449.31		7.0331	0
2022-05-20 16:43:00	3118.68		7.0331	0
2022-05-20 16:43:05	3092.24		7.0331	0
2022-05-20 16:43:10	2984.4		7.0331	0
2022-05-20 16:43:15	2872.83		7.0331	0
2022-05-20 16:43:20	3041.2		7.0331	0
2022-05-20 16:43:25	3343.18		7.0331	0
2022-05-20 16:43:30	3661.95		7.0331	0
2022-05-20 16:43:35	3822.04		7.0331	0
2022-05-20 16:43:40	3909.5		7.0331	0
2022-05-20 16:43:45	4109.67		7.0331	0
2022-05-20 16:43:50	3786.1		7.0331	0
2022-05-20 16:43:55	3570.62		7.0331	0
2022-05-20 16:44:00	3428.07		7.0331	0
2022-05-20 16:44:05	3293.6		7.0331	0
2022-05-20 16:44:10	3358.06		7.0331	0
2022-05-20 16:44:15	3343.47		7.0331	0
2022-05-20 16:44:20	3244.5		7.0331	0
2022-05-20 16:44:25	3401.48		7.0331	0
2022-05-20 16:44:30	3380.44		7.0331	0
2022-05-20 16:44:35	3351.99		7.0331	0
2022-05-20 16:44:40	3528.51		7.0331	0
2022-05-20 16:44:45	3228.04		7.0331	0
2022-05-20 16:44:50	2972.5		7.0331	0
2022-05-20 16:44:55	2691.27		7.0331	0
2022-05-20 16:45:00	2455.28		7.0331	0
2022-05-20 16:45:05	2311.12		7.0331	0
2022-05-20 16:45:10	2236.77		7.0331	0
2022-05-20 16:45:15	2027.23		7.0331	0
2022-05-20 16:45:20	1903.77		7.0331	0
2022-05-20 16:45:25	2094.71		7.0331	0
2022-05-20 16:45:30	2378.53		7.0331	0
2022-05-20 16:45:35	2818.5		7.0331	0
2022-05-20 16:45:40	2908.79		7.0331	0
2022-05-20 16:45:45	3046.81		7.0331	0
2022-05-20 16:45:50	2918.78		7.0331	0
2022-05-20 16:45:55	2746.41		7.0331	0
2022-05-20 16:46:00	2923.47		7.0331	0
2022-05-20 16:46:05	3130.54		7.0331	0
2022-05-20 16:46:10	2981.57		7.0331	0
2022-05-20 16:46:15	3035.97		7.0331	0
2022-05-20 16:46:20	2923.73		7.0331	0
2022-05-20 16:46:25	2706.34		7.0331	0
2022-05-20 16:46:30	2774.11		7.0331	0
2022-05-20 16:46:35	2962.44		7.0331	0
2022-05-20 16:46:40	3013.45		7.0331	0
2022-05-20 16:46:45	3093.22		7.0331	0
2022-05-20 16:46:50	3197.49		7.0331	0
2022-05-20 16:46:55	3097.4		7.0331	0
2022-05-20 16:47:00	2580.54		7.0331	0
2022-05-20 16:47:05	2411.99		7.0331	0
2022-05-20 16:47:10	2368.18		7.0331	0
2022-05-20 16:47:15	2643.5		7.0331	0
2022-05-20 16:47:20	2779.91		7.0331	0
2022-05-20 16:47:25	2813.48		7.0331	0
2022-05-20 16:47:30	2794.13		7.0331	0
2022-05-20 16:47:35	2875.55		7.0331	0
2022-05-20 16:47:40	3044.57		7.0331	0
2022-05-20 16:47:45	2904.09		7.0331	0
2022-05-20 16:47:50	2481.56		7.0331	0
2022-05-20 16:47:55	2673.41		7.0331	0
2022-05-20 16:48:00	2849.48		7.0331	0
2022-05-20 16:48:05	2944.05		7.0331	0
2022-05-20 16:48:10	3175.57		7.0331	0
2022-05-20 16:48:15	3395.33		7.0331	0
2022-05-20 16:48:20	3695.8		7.0331	0
2022-05-20 16:48:25	3798.53		7.0331	0
2022-05-20 16:48:30	3767.68		7.0331	0
2022-05-20 16:48:35	3758.86		7.0331	0
2022-05-20 16:48:40	3409.93		7.0331	0
2022-05-20 16:48:45	3704.09		7.0331	0
2022-05-20 16:48:50	3884.57		7.0331	0
2022-05-20 16:48:55	4209.72		7.0331	0
2022-05-20 16:49:00	3959.84		7.0331	0
2022-05-20 16:49:05	3877.73		7.0331	0
2022-05-20 16:49:10	4142.09		7.0331	0
2022-05-20 16:49:15	4167.16		7.0331	0
2022-05-20 16:49:20	4402.16		7.0331	0
2022-05-20 16:49:25	4790.62		7.0331	0
2022-05-20 16:49:30	4877.86		7.0331	0
2022-05-20 16:49:35	4479.85		7.0331	0
2022-05-20 16:49:40	4284.78		7.0331	0
2022-05-20 16:49:45	4247.8		7.0331	0
2022-05-20 16:49:50	4530.58		7.0331	0
2022-05-20 16:49:55	4247.81		7.0331	0
2022-05-20 16:50:00	3883.33		7.0331	0
2022-05-20 16:50:05	3551.33		7.0331	0
2022-05-20 16:50:10	3429.72		7.0331	0
2022-05-20 16:50:15	3362.07		7.0331	0
2022-05-20 16:50:20	3269.26		7.0331	0
2022-05-20 16:50:25	3103.54		7.0331	0
2022-05-20 16:50:30	3097.58		7.0331	0
2022-05-20 16:50:35	2693		7.0331	0
2022-05-20 16:50:40	2339.53		7.0331	0
2022-05-20 16:50:45	2101.81		7.0331	0
2022-05-20 16:50:50	1903.04		7.0331	0
2022-05-20 16:50:55	1795.97		7.0331	0
2022-05-20 16:51:00	1897.74		7.0331	0
2022-05-20 16:51:05	1901.74		7.0331	0
2022-05-20 16:51:10	1911.88		7.0331	0
2022-05-20 16:51:15	2123.93		7.0331	0
2022-05-20 16:51:20	2738.77		7.0331	0
2022-05-20 16:51:25	2992.31		7.0331	0
2022-05-20 16:51:30	2849.08		7.0331	0
2022-05-20 16:51:35	3030.08		7.0331	0
2022-05-20 16:51:40	3390.2		7.0331	0
2022-05-20 16:51:45	3588.71		7.0331	0
2022-05-20 16:51:50	3761.99		7.0331	0
2022-05-20 16:51:55	4235.62		7.0331	0
2022-05-20 16:52:00	4229.71		7.0331	0
2022-05-20 16:52:05	3959.23		7.0331	0
2022-05-20 16:52:10	3445.6		7.0331	0
2022-05-20 16:52:15	3051.46		7.0331	0
2022-05-20 16:52:20	2969.77		7.0331	0
2022-05-20 16:52:25	3346.78		7.0331	0
2022-05-20 16:52:30	3744.63		7.0331	0
2022-05-20 16:52:35	3694.1		7.0331	0
2022-05-20 16:52:40	3612.36		7.0331	0
2022-05-20 16:52:45	3555.27		7.0331	0
2022-05-20 16:52:50	3667.06		7.0331	0
2022-05-20 16:52:55	3047.69		7.0331	0
2022-05-20 16:53:00	2571.96		7.0331	0
2022-05-20 16:53:05	2699.85		7.0331	0
2022-05-20 16:53:10	2852.68		7.0331	0
2022-05-20 16:53:15	2327.16		7.0331	0
2022-05-20 16:53:20	1935.74		7.0331	0
2022-05-20 16:53:25	2071.6		7.0331	0
2022-05-20 16:53:30	2164.1		7.0331	0
2022-05-20 16:53:35	2333.85		7.0331	0
2022-05-20 16:53:40	2422.47		7.0331	0
2022-05-20 16:53:45	2872.05		7.0331	0
2022-05-20 16:53:50	3067.6		7.0331	0
2022-05-20 16:53:55	3017.02		7.0331	0
2022-05-20 16:54:00	3084.99		7.0331	0
2022-05-20 16:54:05	3269.11		7.0331	0
2022-05-20 16:54:10	3158.42		7.0331	0
2022-05-20 16:54:15	3226.57		7.0331	0
2022-05-20 16:54:20	3398.09		7.0331	0
2022-05-20 16:54:25	3658.21		7.0331	0
2022-05-20 16:54:30	4465.22		7.0331	0
2022-05-20 16:54:35	5102.38		7.0331	0
2022-05-20 16:54:40	5882.17		7.0331	0
2022-05-20 16:54:45	6767.63		7.0331	0
2022-05-20 16:54:50	7419.05		7.0331	0
2022-05-20 16:54:55	7951.6		7.0331	0
2022-05-20 16:55:00	8468.05		7.0331	0
2022-05-20 16:55:05	8133.67		7.0331	0
2022-05-20 16:55:10	8195.37		7.0331	0
2022-05-20 16:55:15	8765.46		7.0331	0
2022-05-20 16:55:20	9192.41		7.0331	0
2022-05-20 16:55:25	9119.23		7.0331	0
2022-05-20 16:55:30	7236.66		7.0331	0
2022-05-20 16:55:35	6997.96		7.0331	0
2022-05-20 16:55:40	6518.06		7.0331	0
2022-05-20 16:55:45	5855.45		7.0331	0
2022-05-20 16:55:50	5725.25		7.0331	0
2022-05-20 16:55:55	5367.18		7.0331	0
2022-05-20 16:56:00	4875.8		7.0331	0
2022-05-20 16:56:05	4050.39		7.0331	0
2022-05-20 16:56:10	4047.73		7.0331	0
2022-05-20 16:56:15	4116.08		7.0331	0
2022-05-20 16:56:20	4128.58		7.0331	0
2022-05-20 16:56:25	4244.79		7.0331	0
2022-05-20 16:56:30	4357.53		7.0331	0
2022-05-20 16:56:35	4588.43		7.0331	0
2022-05-20 16:56:40	5120.02		7.0331	0
2022-05-20 16:56:45	5141.1		7.0331	0
2022-05-20 16:56:50	4795.93		7.0331	0
2022-05-20 16:56:55	4772.38		7.0331	0
2022-05-20 16:57:00	4780.43		7.0331	0
2022-05-20 16:57:05	4758.98		7.0331	0
2022-05-20 16:57:10	5096.07		7.0331	0
2022-05-20 16:57:15	5269.12		7.0331	0
2022-05-20 16:57:20	5027.46		7.0331	0
2022-05-20 16:57:25	4671.86		7.0331	0
2022-05-20 16:57:30	4631.97		7.0331	0
2022-05-20 16:57:35	4428.59		7.0331	0
2022-05-20 16:57:40	4110.02		7.0331	0
2022-05-20 16:57:45	4185.37		7.0331	0
2022-05-20 16:57:50	4457.46		7.0331	0
2022-05-20 16:57:55	4435.01		7.0331	0
2022-05-20 16:58:00	4438.52		7.0331	0
2022-05-20 16:58:05	4194.41		7.0331	0
2022-05-20 16:58:10	4304.47		7.0331	0
2022-05-20 16:58:15	4312.03		7.0331	0
2022-05-20 16:58:20	4104.62		7.0331	0
2022-05-20 16:58:25	3666.08		7.0331	0
2022-05-20 16:58:30	3350.44		7.0331	0
2022-05-20 16:58:35	3098.03		7.0331	0
2022-05-20 16:58:40	3061.62		7.0331	0
2022-05-20 16:58:45	3180.13		7.0331	0
2022-05-20 16:58:50	3352.57		7.0331	0
2022-05-20 16:58:55	3795.98		7.0331	0
2022-05-20 16:59:00	3590.51		7.0331	0
2022-05-20 16:59:05	3543.02		7.0331	0
2022-05-20 16:59:10	3735.09		7.0331	0
2022-05-20 16:59:15	3880.28		7.0331	0
2022-05-20 16:59:20	3858.26		7.0331	0
2022-05-20 16:59:25	3955.22		7.0331	0
2022-05-20 16:59:30	3815.36		7.0331	0
2022-05-20 16:59:35	3557.35		7.0331	0
2022-05-20 16:59:40	3232.13		7.0331	0
2022-05-20 16:59:45	3073.52		7.0331	0
2022-05-20 16:59:50	3033.85		7.0331	0
2022-05-20 16:59:55	3488.45		7.0331	0
2022-05-20 17:00:05	4751.84		7.0331	0
2022-05-20 17:00:10	4877.24		7.0331	0
2022-05-20 17:00:15	5206.81		7.0331	0
2022-05-20 17:00:20	5129.24		7.0331	0
2022-05-20 17:00:25	4943.57		7.0331	0
2022-05-20 17:00:30	4882.58		7.0331	0
2022-05-20 17:00:35	5018.71		7.0331	0
2022-05-20 17:00:40	5102.26		7.0331	0
2022-05-20 17:00:45	4741.95		7.0331	0
2022-05-20 17:00:50	4151.81		7.0331	0
2022-05-20 17:00:55	3708.27		7.0331	0
2022-05-20 17:01:00	3618.46		7.0331	0
2022-05-20 17:01:05	3676.08		7.0331	0
2022-05-20 17:01:10	3575.55		7.0331	0
2022-05-20 17:01:15	3622.01		7.0331	0
2022-05-20 17:01:20	3586.1		7.0331	0
2022-05-20 17:01:25	3518.94		7.0331	0
2022-05-20 17:01:30	3564.36		7.0331	0
2022-05-20 17:01:35	3983.42		7.0331	0
2022-05-20 17:01:40	4275.73		7.0331	0
2022-05-20 17:01:45	4591.03		7.0331	0
2022-05-20 17:01:50	4389.86		7.0331	0
2022-05-20 17:01:55	4597.39		7.0331	0
2022-05-20 17:02:00	4503.45		7.0331	0
2022-05-20 17:02:05	4158.55		7.0331	0
2022-05-20 17:02:10	3695.93		7.0331	0
2022-05-20 17:02:15	3438.03		7.0331	0
2022-05-20 17:02:20	3553.9		7.0331	0
2022-05-20 17:02:25	3804.29		7.0331	0
2022-05-20 17:02:30	4270.96		7.0331	0
2022-05-20 17:02:35	4518.63		7.0331	0
2022-05-20 17:02:40	4099.71		7.0331	0
2022-05-20 17:02:45	4432.62		7.0331	0
2022-05-20 17:02:50	4676.92		7.0331	0
2022-05-20 17:02:55	4572.98		7.0331	0
2022-05-20 17:03:00	4446.84		7.0331	0
2022-05-20 17:03:05	4221.23		7.0331	0
2022-05-20 17:03:10	3966.98		7.0331	0
2022-05-20 17:03:15	3586.21		7.0331	0
2022-05-20 17:03:20	3548.37		7.0331	0
2022-05-20 17:03:25	3426.24		7.0331	0
2022-05-20 17:03:30	3258.25		7.0331	0
2022-05-20 17:03:35	3080.44		7.0331	0
2022-05-20 17:03:40	3004.65		7.0331	0
2022-05-20 17:03:45	2842.13		7.0331	0
2022-05-20 17:03:50	2669.3		7.0331	0
2022-05-20 17:03:55	2809.73		7.0331	0
2022-05-20 17:04:00	3022.88		7.0331	0
2022-05-20 17:04:05	3033.07		7.0331	0
2022-05-20 17:04:10	3396.97		7.0331	0
2022-05-20 17:04:15	3381.14		7.0331	0
2022-05-20 17:04:20	3255.77		7.0331	0
2022-05-20 17:04:25	3074.44		7.0331	0
2022-05-20 17:04:30	3100.05		7.0331	0
2022-05-20 17:04:35	3066.21		7.0331	0
2022-05-20 17:04:40	3095.2		7.0331	0
2022-05-20 17:04:45	3083.46		7.0331	0
2022-05-20 17:04:50	3095.64		7.0331	0
2022-05-20 17:04:55	2908.42		7.0331	0
2022-05-20 17:05:00	2242.77		5.56532	0
2022-05-20 17:05:05	2105.41		5.56532	0
2022-05-20 17:05:10	2114.07		5.56532	0
2022-05-20 17:05:15	2500.18		6.52486	0
2022-05-20 17:05:20	2453.4		6.52486	0
2022-05-20 17:05:25	2452.24		6.52486	0
2022-05-20 17:05:30	2849.75		6.52486	0
2022-05-20 17:05:35	3148.15		6.52486	0
2022-05-20 17:05:40	3382.22		6.52486	0
2022-05-20 17:05:45	3882.17		6.52486	0
2022-05-20 17:05:50	4098.28		6.52486	0
2022-05-20 17:05:55	4198.14		6.52486	0
2022-05-20 17:06:00	4268.86		6.52486	0
2022-05-20 17:06:05	4354.75		6.52486	0
2022-05-20 17:06:10	4362.31		6.52486	0
2022-05-20 17:06:15	4488.72		6.52486	0
2022-05-20 17:06:20	4430.78		6.52486	0
2022-05-20 17:06:25	4404.29		6.52486	0
2022-05-20 17:06:30	4078.61		6.52486	0
2022-05-20 17:06:35	4100.96		6.52486	0
2022-05-20 17:06:40	4196.37		6.52486	0
2022-05-20 17:06:45	4383.06		6.52486	0
2022-05-20 17:06:50	4470.45		6.52486	0
2022-05-20 17:06:55	4317.46		6.52486	0
2022-05-20 17:07:00	3884.44		6.52486	0
2022-05-20 17:07:05	3654.83		6.52486	0
2022-05-20 17:07:10	3731.54		6.52486	0
2022-05-20 17:07:15	3697.9		6.52486	0
2022-05-20 17:07:20	3344.68		6.52486	0
2022-05-20 17:07:25	2747.78		6.52486	0
2022-05-20 17:07:30	2699.03		6.52486	0
2022-05-20 17:07:35	2829.22		6.52486	0
2022-05-20 17:07:40	2825.81		6.52486	0
2022-05-20 17:07:45	2885.05		6.52486	0
2022-05-20 17:07:50	3178.27		6.52486	0
2022-05-20 17:07:55	3430.52		6.52486	0
2022-05-20 17:08:00	3556.52		6.52486	0
2022-05-20 17:08:05	3539.52		6.52486	0
2022-05-20 17:08:10	3460.78		6.52486	0
2022-05-20 17:08:15	3278.71		6.52486	0
2022-05-20 17:08:20	3228.15		6.52486	0
2022-05-20 17:08:25	3287.69		6.52486	0
2022-05-20 17:08:30	3119.42		6.52486	0
2022-05-20 17:08:35	3218.93		6.52486	0
2022-05-20 17:08:40	3477.3		6.52486	0
2022-05-20 17:08:45	3703.97		6.52486	0
2022-05-20 17:08:50	3957.58		6.52486	0
2022-05-20 17:08:55	4167.41		6.52486	0
2022-05-20 17:09:00	4132.42		6.52486	0
2022-05-20 17:09:05	4062.99		6.52486	0
2022-05-20 17:09:10	4000.16		6.52486	0
2022-05-20 17:09:15	3755.11		6.52486	0
2022-05-20 17:09:20	3563.25		6.52486	0
2022-05-20 17:09:25	3391.2		6.52486	0
2022-05-20 17:09:30	2978.8		6.52486	0
2022-05-20 17:09:35	2700.73		6.52486	0
2022-05-20 17:09:40	2629.14		6.52486	0
2022-05-20 17:09:45	2635.46		6.52486	0
2022-05-20 17:09:50	2609.23		6.52486	0
2022-05-20 17:09:55	2581.67		6.52486	0
2022-05-20 17:10:00	2491.6		6.52486	0
2022-05-20 17:10:05	2501.67		6.52486	0
2022-05-20 17:10:10	2597.81		6.52486	0
2022-05-20 17:10:15	2578.88		6.52486	0
2022-05-20 17:10:20	2573.49		6.52486	0
2022-05-20 17:10:25	2632.58		6.52486	0
2022-05-20 17:10:30	2807.18		6.52486	0
2022-05-20 17:10:35	3088.38		6.52486	0
2022-05-20 17:10:40	3376.29		6.52486	0
2022-05-20 17:10:45	3414.66		6.52486	0
2022-05-20 17:10:50	3483.05		6.52486	0
2022-05-20 17:10:55	3651.39		6.52486	0
2022-05-20 17:11:00	3654.86		6.52486	0
2022-05-20 17:11:05	3792.81		6.52486	0
2022-05-20 17:11:10	3587.88		6.52486	0
2022-05-20 17:11:15	3674		6.52486	0
2022-05-20 17:11:20	3717.8		6.52486	0
2022-05-20 17:11:25	3852.51		6.52486	0
2022-05-20 17:11:30	4251.08		6.52486	0
2022-05-20 17:11:35	4505.33		6.52486	0
2022-05-20 17:11:40	4684.02		6.52486	0
2022-05-20 17:11:45	4770.38		6.52486	0
2022-05-20 17:11:50	5119.17		6.52486	0
2022-05-20 17:11:55	5355.89		6.52486	0
2022-05-20 17:12:00	5447.86		6.52486	0
2022-05-20 17:12:05	5581.04		6.52486	0
2022-05-20 17:12:10	5448.44		6.52486	0
2022-05-20 17:12:15	4876.8		6.52486	0
2022-05-20 17:12:20	4274.44		6.52486	0
2022-05-20 17:12:25	3824.11		6.52486	0
2022-05-20 17:12:30	3582.33		6.52486	0
2022-05-20 17:12:35	3537.84		6.52486	0
2022-05-20 17:12:40	3308.37		6.52486	0
2022-05-20 17:12:45	3145.48		6.52486	0
2022-05-20 17:12:50	3121.04		6.52486	0
2022-05-20 17:12:55	2903.2		6.52486	0
2022-05-20 17:13:00	2636.36		6.52486	0
2022-05-20 17:13:05	2445.47		6.52486	0
2022-05-20 17:13:10	2412.84		6.52486	0
2022-05-20 17:13:15	2439.49		6.52486	0
2022-05-20 17:13:20	2511.71		6.52486	0
2022-05-20 17:13:25	2553.4		6.52486	0
2022-05-20 17:13:30	2572.16		6.52486	0
2022-05-20 17:13:35	2580.7		6.52486	0
2022-05-20 17:13:40	2583.89		6.52486	0
2022-05-20 17:13:45	2927.72		6.52486	0
2022-05-20 17:13:50	3563.78		6.52486	0
2022-05-20 17:13:55	4045.58		6.52486	0
2022-05-20 17:14:00	4163.47		6.52486	0
2022-05-20 17:14:05	4261.58		6.52486	0
2022-05-20 17:14:10	4446.56		6.52486	0
2022-05-20 17:14:15	4504.86		6.52486	0
2022-05-20 17:14:20	4625.1		6.52486	0
2022-05-20 17:14:25	4865.76		6.52486	0
2022-05-20 17:14:30	5044.75		6.52486	0
2022-05-20 17:14:35	5110.53		6.52486	0
2022-05-20 17:14:40	5252.26		6.52486	0
2022-05-20 17:14:45	5594.53		6.52486	0
2022-05-20 17:14:50	5732.45		6.52486	0
2022-05-20 17:14:55	5940.23		6.52486	0
2022-05-20 17:15:00	5817.56		6.52486	0
2022-05-20 17:15:05	5835.58		6.52486	0
2022-05-20 17:15:10	5730.22		6.52486	0
2022-05-20 17:15:15	5195.12		6.52486	0
2022-05-20 17:15:20	5042.36		6.52486	0
2022-05-20 17:15:25	4704.07		6.52486	0
2022-05-20 17:15:30	4266.87		6.52486	0
2022-05-20 17:15:35	3934.86		6.52486	0
2022-05-20 17:15:40	3749.14		6.52486	0
2022-05-20 17:15:45	3392.89		6.52486	0
2022-05-20 17:15:50	3376.03		6.52486	0
2022-05-20 17:15:55	3428.72		6.52486	0
2022-05-20 17:16:00	3521.27		6.52486	0
2022-05-20 17:16:05	3715.64		6.52486	0
2022-05-20 17:16:10	3695.27		6.52486	0
2022-05-20 17:16:15	3617.35		6.52486	0
2022-05-20 17:16:20	3735.74		6.52486	0
2022-05-20 17:16:25	3785.66		6.52486	0
2022-05-20 17:16:30	3875.28		6.52486	0
2022-05-20 17:16:35	3916.81		6.52486	0
2022-05-20 17:16:40	3894.65		6.52486	0
2022-05-20 17:16:45	3840.08		6.52486	0
2022-05-20 17:16:50	3563.56		6.52486	0
2022-05-20 17:16:55	3240.21		6.52486	0
2022-05-20 17:17:00	3127.08		6.52486	0
2022-05-20 17:17:05	3063.93		6.52486	0
2022-05-20 17:17:10	3240.55		6.52486	0
2022-05-20 17:17:15	3296.86		6.52486	0
2022-05-20 17:17:20	3417.89		6.52486	0
2022-05-20 17:17:25	3444.92		6.52486	0
2022-05-20 17:17:30	3470.85		6.52486	0
2022-05-20 17:17:35	3607.41		6.52486	0
2022-05-20 17:17:40	4057.6		6.52486	0
2022-05-20 17:17:45	4203.15		6.52486	0
2022-05-20 17:17:50	4398.84		6.52486	0
2022-05-20 17:17:55	4619.51		6.52486	0
2022-05-20 17:18:00	4892.34		6.52486	0
2022-05-20 17:18:05	4712.67		6.52486	0
2022-05-20 17:18:10	4581.43		6.52486	0
2022-05-20 17:18:15	4829.72		6.52486	0
2022-05-20 17:18:20	5131.43		6.52486	0
2022-05-20 17:18:25	5170.77		6.52486	0
2022-05-20 17:18:30	4805.46		6.52486	0
2022-05-20 17:18:35	4630.97		6.52486	0
2022-05-20 17:18:40	5006.56		6.52486	0
2022-05-20 17:18:45	5241.72		6.52486	0
2022-05-20 17:18:50	5460.11		6.52486	0
2022-05-20 17:18:55	5604.84		6.52486	0
2022-05-20 17:19:00	5708.84		6.52486	0
2022-05-20 17:19:05	5741.85		6.52486	0
2022-05-20 17:19:10	5245.48		6.52486	0
2022-05-20 17:19:15	4893.65		6.52486	0
2022-05-20 17:19:20	4906.41		6.52486	0
2022-05-20 17:19:25	5270.95		6.52486	0
2022-05-20 17:19:30	5534.81		6.52486	0
2022-05-20 17:19:35	5440.49		6.52486	0
2022-05-20 17:19:40	5557.67		6.52486	0
2022-05-20 17:19:45	5433.33		6.52486	0
2022-05-20 17:19:50	5010.21		6.52486	0
2022-05-20 17:19:55	4756.44		6.52486	0
2022-05-20 17:20:00	4690.45		6.52486	0
2022-05-20 17:20:05	4283.55		6.52486	0
2022-05-20 17:20:10	4098.43		6.52486	0
2022-05-20 17:20:15	3830.13		6.52486	0
2022-05-20 17:20:20	3687.99		6.52486	0
2022-05-20 17:20:25	3520.03		6.52486	0
2022-05-20 17:20:30	3212.21		6.52486	0
2022-05-20 17:20:35	3286.57		6.52486	0
2022-05-20 17:20:40	3276.35		6.52486	0
2022-05-20 17:20:45	3385.51		6.52486	0
2022-05-20 17:20:50	3354.96		6.52486	0
2022-05-20 17:20:55	3583.32		6.52486	0
2022-05-20 17:21:00	3673.72		6.52486	0
2022-05-20 17:21:05	3680.56		6.52486	0
2022-05-20 17:21:10	3767.8		6.52486	0
2022-05-20 17:21:15	3914.95		6.52486	0
2022-05-20 17:21:20	3942.36		6.52486	0
2022-05-20 17:21:25	3928.96		6.52486	0
2022-05-20 17:21:30	3884.41		6.52486	0
2022-05-20 17:21:35	3840.51		6.52486	0
2022-05-20 17:21:40	3866.18		6.52486	0
2022-05-20 17:21:45	3803.21		6.52486	0
2022-05-20 17:21:50	3752.38		6.52486	0
2022-05-20 17:21:55	3686.02		6.52486	0
2022-05-20 17:22:00	3744.29		6.52486	0
2022-05-20 17:22:05	4006.6		6.52486	0
2022-05-20 17:22:10	4348.09		6.52486	0
2022-05-20 17:22:15	4773.26		6.52486	0
2022-05-20 17:22:20	4807.62		6.52486	0
2022-05-20 17:22:25	4919.5		6.52486	0
2022-05-20 17:22:30	5032.36		6.52486	0
2022-05-20 17:22:35	4859.76		6.52486	0
2022-05-20 17:22:40	4970.78		6.52486	0
2022-05-20 17:22:45	4932.17		6.52486	0
2022-05-20 17:22:50	4358.74		6.52486	0
2022-05-20 17:22:55	3813.23		6.52486	0
2022-05-20 17:23:00	3155.34		6.52486	0
2022-05-20 17:23:05	2479.92		6.52486	0
2022-05-20 17:23:10	1748.05		6.52486	0
2022-05-20 17:23:15	1538.25		6.52486	0
2022-05-20 17:23:20	1529.29		6.52486	0
2022-05-20 17:23:25	1695.04		6.52486	0
2022-05-20 17:23:30	3162.8		6.52486	0
2022-05-20 17:23:35	3761.94		6.52486	0
2022-05-20 17:23:40	3934.4		6.52486	0
2022-05-20 17:23:45	3982.63		6.52486	0
2022-05-20 17:23:50	4274.03		6.52486	0
2022-05-20 17:23:55	3681.61		6.52486	0
2022-05-20 17:24:00	3895.09		6.52486	0
2022-05-20 17:24:05	4069.39		6.52486	0
2022-05-20 17:24:10	4334.73		6.52486	0
2022-05-20 17:24:15	4447.13		6.52486	0
2022-05-20 17:24:20	4458.31		6.52486	0
2022-05-20 17:24:25	4318.97		6.52486	0
2022-05-20 17:24:30	4135.03		6.52486	0
2022-05-20 17:24:35	4247.51		6.52486	0
2022-05-20 17:24:40	4022.33		6.52486	0
2022-05-20 17:24:45	3766		6.52486	0
2022-05-20 17:24:50	3757.48		6.52486	0
2022-05-20 17:24:55	3453.33		6.52486	0
2022-05-20 17:25:00	3267.69		6.52486	0
2022-05-20 17:25:05	3019.62		6.52486	0
2022-05-20 17:25:10	2753.24		6.52486	0
2022-05-20 17:25:15	2598.42		6.52486	0
2022-05-20 17:25:20	2361.3		6.52486	0
2022-05-20 17:25:25	2263.22		6.52486	0
2022-05-20 17:25:30	2101.08		6.52486	0
2022-05-20 17:25:35	2015.53		6.52486	0
2022-05-20 17:25:40	1873.82		6.52486	0
2022-05-20 17:25:45	1909.81		6.52486	0
2022-05-20 17:25:50	2233.44		6.52486	0
2022-05-20 17:25:55	2267.66		6.52486	0
2022-05-20 17:26:00	2323.48		6.52486	0
2022-05-20 17:26:05	2621.97		6.52486	0
2022-05-20 17:26:10	2772.9		6.52486	0
2022-05-20 17:26:15	3114.9		6.52486	0
2022-05-20 17:26:20	3584.12		6.52486	0
2022-05-20 17:26:25	3711.13		6.52486	0
2022-05-20 17:26:30	4118.73		6.52486	0
2022-05-20 17:26:35	4281.13		6.52486	0
2022-05-20 17:26:40	4580.77		6.52486	0
2022-05-20 17:26:45	4987.47		6.52486	0
2022-05-20 17:26:50	4934.42		6.52486	0
2022-05-20 17:26:55	4850.12		6.52486	0
2022-05-20 17:27:00	4704.38		6.52486	0
2022-05-20 17:27:05	4409.83		6.52486	0
2022-05-20 17:27:10	4069.55		6.52486	0
2022-05-20 17:27:15	3683.66		6.52486	0
2022-05-20 17:27:20	3322.34		6.52486	0
2022-05-20 17:27:25	2830.7		6.52486	0
2022-05-20 17:27:30	2419.47		6.52486	0
2022-05-20 17:27:35	2247.75		6.52486	0
2022-05-20 17:27:40	2122.07		6.52486	0
2022-05-20 17:27:45	1841.62		6.52486	0
2022-05-20 17:27:50	1635.62		6.52486	0
2022-05-20 17:27:55	1520.52		6.52486	0
2022-05-20 17:28:00	1661.34		6.52486	0
2022-05-20 17:28:05	1723.21		6.52486	0
2022-05-20 17:28:10	1974.33		6.52486	0
2022-05-20 17:28:15	2062.01		6.52486	0
2022-05-20 17:28:20	2288.96		6.52486	0
2022-05-20 17:28:25	2506.43		6.52486	0
2022-05-20 17:28:30	2580.8		6.52486	0
2022-05-20 17:28:35	2646.51		6.52486	0
2022-05-20 17:28:40	3016.83		6.52486	0
2022-05-20 17:28:45	3270.93		6.52486	0
2022-05-20 17:28:50	3306.45		6.52486	0
2022-05-20 17:28:55	3603.14		6.52486	0
2022-05-20 17:29:00	3703.98		6.52486	0
2022-05-20 17:29:05	4061.83		6.52486	0
2022-05-20 17:29:10	4418.85		6.52486	0
2022-05-20 17:29:15	4656.41		6.52486	0
2022-05-20 17:29:20	4817.54		6.52486	0
2022-05-20 17:29:25	4632.35		6.52486	0
2022-05-20 17:29:30	4968.21		6.52486	0
2022-05-20 17:29:35	5053.36		6.52486	0
2022-05-20 17:29:40	4728.71		6.52486	0
2022-05-20 17:29:45	4480.96		6.52486	0
2022-05-20 17:29:50	4728.69		6.52486	0
2022-05-20 17:29:55	4995.4		6.52486	0
2022-05-20 17:30:00	5164.96		6.52486	0
2022-05-20 17:30:05	5110.61		6.52486	0
2022-05-20 17:30:10	5089.44		6.52486	0
2022-05-20 17:30:15	5182.7		6.52486	0
2022-05-20 17:30:20	5241.22		6.52486	0
2022-05-20 17:30:25	4994.23		6.52486	0
2022-05-20 17:30:30	4835.42		6.52486	0
2022-05-20 17:30:35	4510.66		6.52486	0
2022-05-20 17:30:40	4249.3		6.52486	0
2022-05-20 17:30:45	4254.37		6.52486	0
2022-05-20 17:30:50	3864.9		6.52486	0
2022-05-20 17:30:55	3899.05		6.52486	0
2022-05-20 17:31:00	3892.28		6.52486	0
2022-05-20 17:31:05	3943.39		6.52486	0
2022-05-20 17:31:10	3940.25		6.52486	0
2022-05-20 17:31:15	4042.55		6.52486	0
2022-05-20 17:31:20	4226.93		6.52486	0
2022-05-20 17:31:25	4186.82		6.52486	0
2022-05-20 17:31:30	3774.06		6.52486	0
2022-05-20 17:31:35	3463.76		6.52486	0
2022-05-20 17:31:40	3124.39		6.52486	0
2022-05-20 17:31:45	2802.41		6.52486	0
2022-05-20 17:31:50	2494.31		6.52486	0
2022-05-20 17:31:55	2316.23		6.52486	0
2022-05-20 17:32:00	2294.66		6.52486	0
2022-05-20 17:32:05	2221.49		6.52486	0
2022-05-20 17:32:10	2248.96		6.52486	0
2022-05-20 17:32:15	2222.01		6.52486	0
2022-05-20 17:32:20	2172.09		6.52486	0
2022-05-20 17:32:25	2284.06		6.52486	0
2022-05-20 17:32:30	2497.83		6.52486	0
2022-05-20 17:32:35	2644.66		6.52486	0
2022-05-20 17:32:40	2772.55		6.52486	0
2022-05-20 17:32:45	2728.62		6.52486	0
2022-05-20 17:32:50	2979.38		6.52486	0
2022-05-20 17:32:55	2847.92		6.52486	0
2022-05-20 17:33:00	2680.49		6.52486	0
2022-05-20 17:33:05	2737.8		6.52486	0
2022-05-20 17:33:10	2781.93		6.52486	0
2022-05-20 17:33:15	2814.04		6.52486	0
2022-05-20 17:33:20	3012.8		6.52486	0
2022-05-20 17:33:25	3241.34		6.52486	0
2022-05-20 17:33:30	3289.79		6.52486	0
2022-05-20 17:33:35	3049.18		6.52486	0
2022-05-20 17:33:40	2572.9		6.52486	0
2022-05-20 17:33:45	2274.43		6.52486	0
2022-05-20 17:33:50	2149.51		6.52486	0
2022-05-20 17:33:55	2127.16		6.52486	0
2022-05-20 17:34:00	1894.13		6.52486	0
2022-05-20 17:34:05	1609.22		6.52486	0
2022-05-20 17:34:10	1587.21		6.52486	0
2022-05-20 17:34:15	1492.19		6.52486	0
2022-05-20 17:34:20	1274.35		6.52486	0
2022-05-20 17:34:25	1700.3		6.52486	0
2022-05-20 17:34:30	1711.03		6.52486	0
2022-05-20 17:34:35	1735.81		6.52486	0
2022-05-20 17:34:40	1778.34		6.52486	0
2022-05-20 17:34:45	1762.56		6.52486	0
2022-05-20 17:34:50	1879.94		6.52486	0
2022-05-20 17:34:55	1838.43		6.52486	0
2022-05-20 17:35:00	1924.2		6.52486	0
2022-05-20 17:35:05	1184.17		6.52486	0
2022-05-20 17:35:10	1338.68		6.52486	0
2022-05-20 17:35:15	1196.86		5.40631	0
2022-05-20 17:35:20	1324.33		5.40631	0
2022-05-20 17:35:25	1363.95		5.40631	0
2022-05-20 17:35:30	1353.73		5.40631	0
2022-05-20 17:35:35	1479.25		5.40631	0
2022-05-20 17:35:40	1731.75		5.40631	0
2022-05-20 17:35:45	1873.49		5.40631	0
2022-05-20 17:35:50	2150.83		5.40631	0
2022-05-20 17:35:55	2117.37		5.40631	0
2022-05-20 17:36:00	2085.09		5.40631	0
2022-05-20 17:36:05	2013.59		5.40631	0
2022-05-20 17:36:10	1978.5		5.40631	0
2022-05-20 17:36:15	2060.14		5.40631	0
2022-05-20 17:36:20	2219.72		5.40631	0
2022-05-20 17:36:25	2399.05		5.40631	0
2022-05-20 17:36:30	2303.93		5.40631	0
2022-05-20 17:36:35	2264.21		5.40631	0
2022-05-20 17:36:40	2297.71		5.40631	0
2022-05-20 17:36:45	2370.37		5.40631	0
2022-05-20 17:36:50	2339.88		5.40631	0
2022-05-20 17:36:55	2262.91		5.40631	0
2022-05-20 17:37:00	2193.65		5.40631	0
2022-05-20 17:37:05	2132.75		5.40631	0
2022-05-20 17:37:10	1982.65		5.40631	0
2022-05-20 17:37:15	1781.65		5.40631	0
2022-05-20 17:37:20	1667.91		5.40631	0
2022-05-20 17:37:25	1670.4		5.40631	0
2022-05-20 17:37:30	1718.56		5.40631	0
2022-05-20 17:37:35	1832.64		5.40631	0
2022-05-20 17:37:40	2016.11		5.40631	0
2022-05-20 17:37:45	2159.37		5.40631	0
2022-05-20 17:37:50	2184.33		5.40631	0
2022-05-20 17:37:55	2336.77		5.40631	0
2022-05-20 17:38:00	2448.67		5.40631	0
2022-05-20 17:38:05	2539.45		5.40631	0
2022-05-20 17:38:10	2343.97		5.40631	0
2022-05-20 17:38:15	2386.43		5.40631	0
2022-05-20 17:38:20	2516.67		5.40631	0
2022-05-20 17:38:25	2530.85		5.40631	0
2022-05-20 17:38:30	2655.43		5.40631	0
2022-05-20 17:38:35	2407.48		5.40631	0
2022-05-20 17:38:40	2050.45		5.40631	0
2022-05-20 17:38:45	2056.22		5.40631	0
2022-05-20 17:38:50	1976.9		5.40631	0
2022-05-20 17:38:55	1957.57		5.40631	0
2022-05-20 17:39:00	1905.99		5.40631	0
2022-05-20 17:39:05	2009.33		5.40631	0
2022-05-20 17:39:10	2181.85		5.40631	0
2022-05-20 17:39:15	2235.79		5.40631	0
2022-05-20 17:39:20	2120.14		5.40631	0
2022-05-20 17:39:25	2072.35		5.40631	0
2022-05-20 17:39:30	1900.63		5.40631	0
2022-05-20 17:39:35	1922.51		5.40631	0
2022-05-20 17:39:40	1946.27		5.40631	0
2022-05-20 17:39:45	2056.79		5.40631	0
2022-05-20 17:39:50	2110.83		5.40631	0
2022-05-20 17:39:55	2051.24		5.40631	0
2022-05-20 17:40:00	1955.37		5.40631	0
2022-05-20 17:40:05	2022.38		5.40631	0
2022-05-20 17:40:10	1987.02		5.40631	0
2022-05-20 17:40:15	1852.6		5.40631	0
2022-05-20 17:40:20	1612.05		5.40631	0
2022-05-20 17:40:25	1434.82		5.40631	0
2022-05-20 17:40:30	1395.34		5.40631	0
2022-05-20 17:40:35	1343.98		5.40631	0
2022-05-20 17:40:40	1295.9		5.40631	0
2022-05-20 17:40:45	1261.63		5.40631	0
2022-05-20 17:40:50	1295.16		5.40631	0
2022-05-20 17:40:55	1415.97		5.40631	0
2022-05-20 17:41:00	1705.27		5.40631	0
2022-05-20 17:41:05	1926.87		5.40631	0
2022-05-20 17:41:10	1998.24		5.40631	0
2022-05-20 17:41:15	2039		5.40631	0
2022-05-20 17:41:20	2160.22		5.40631	0
2022-05-20 17:41:25	2175.17		5.40631	0
2022-05-20 17:41:30	2227.33		5.40631	0
2022-05-20 17:41:35	2169.53		5.40631	0
2022-05-20 17:41:40	2122.3		5.40631	0
2022-05-20 17:41:45	2140.76		5.40631	0
2022-05-20 17:41:50	2393.88		5.40631	0
2022-05-20 17:41:55	2361.73		5.40631	0
2022-05-20 17:42:00	2267.91		5.40631	0
2022-05-20 17:42:05	2310.05		5.40631	0
2022-05-20 17:42:10	2244.22		5.40631	0
2022-05-20 17:42:15	2157.31		5.40631	0
2022-05-20 17:42:20	2046.77		5.40631	0
2022-05-20 17:42:25	1842.78		5.40631	0
2022-05-20 17:42:30	1745.19		5.40631	0
2022-05-20 17:42:35	1579.38		5.40631	0
2022-05-20 17:42:40	1468.13		5.40631	0
2022-05-20 17:42:45	1506.13		5.40631	0
2022-05-20 17:42:50	1572.71		5.40631	0
2022-05-20 17:42:55	1771.34		5.40631	0
2022-05-20 17:43:00	1826.58		5.40631	0
2022-05-20 17:43:05	1841.86		5.40631	0
2022-05-20 17:43:10	1831.39		5.40631	0
2022-05-20 17:43:15	2021.86		5.40631	0
2022-05-20 17:43:20	2092.26		5.40631	0
2022-05-20 17:43:25	2124.18		5.40631	0
2022-05-20 17:43:30	2146.64		5.40631	0
2022-05-20 17:43:35	2239.53		5.40631	0
2022-05-20 17:43:40	2344.09		5.40631	0
2022-05-20 17:43:45	2640.18		5.40631	0
2022-05-20 17:43:50	2802.8		5.40631	0
2022-05-20 17:43:55	2911.24		5.40631	0
2022-05-20 17:44:00	2762.4		5.40631	0
2022-05-20 17:44:05	2615.99		5.40631	0
2022-05-20 17:44:10	2512.97		5.40631	0
2022-05-20 17:44:15	2423.55		5.40631	0
2022-05-20 17:44:20	2441.98		5.40631	0
2022-05-20 17:44:25	2516.9		5.40631	0
2022-05-20 17:44:30	2548.96		5.40631	0
2022-05-20 17:44:35	2611.75		5.40631	0
2022-05-20 17:44:40	2731.65		5.40631	0
2022-05-20 17:44:45	2806.9		5.40631	0
2022-05-20 17:44:50	2971.48		5.40631	0
2022-05-20 17:44:55	3631.17		5.40631	0
2022-05-20 17:45:00	3770.92		5.40631	0
2022-05-20 17:45:05	3759.71		5.40631	0
2022-05-20 17:45:10	3952.19		5.40631	0
2022-05-20 17:45:15	3977.12		5.40631	0
2022-05-20 17:45:20	3929.1		5.40631	0
2022-05-20 17:45:25	3991.27		5.40631	0
2022-05-20 17:45:30	3974.33		5.40631	0
2022-05-20 17:45:35	3985.71		5.40631	0
2022-05-20 17:45:40	3832.4		5.40631	0
2022-05-20 17:45:45	3625.68		5.40631	0
2022-05-20 17:45:50	3398.53		5.40631	0
2022-05-20 17:45:55	3162.73		5.40631	0
2022-05-20 17:46:00	2822.3		5.40631	0
2022-05-20 17:46:05	2616.61		5.40631	0
2022-05-20 17:46:10	2239.24		5.40631	0
2022-05-20 17:46:15	2138.22		5.40631	0
2022-05-20 17:46:20	2250.5		5.40631	0
2022-05-20 17:46:25	2393.93		5.40631	0
2022-05-20 17:46:30	2472.87		5.40631	0
2022-05-20 17:46:35	2617.88		5.40631	0
2022-05-20 17:46:40	2890.59		5.40631	0
2022-05-20 17:46:45	2768.4		5.40631	0
2022-05-20 17:46:50	2738.34		5.40631	0
2022-05-20 17:46:55	2797.8		5.40631	0
2022-05-20 17:47:00	2842.48		5.40631	0
2022-05-20 17:47:05	2833.03		5.40631	0
2022-05-20 17:47:10	2914.63		5.40631	0
2022-05-20 17:47:15	3055.85		5.40631	0
2022-05-20 17:47:20	3265.67		5.40631	0
2022-05-20 17:47:25	3127.78		5.40631	0
2022-05-20 17:47:30	3021.23		5.40631	0
2022-05-20 17:47:35	2942.11		5.40631	0
2022-05-20 17:47:40	2863.06		5.40631	0
2022-05-20 17:47:45	2692.84		5.40631	0
2022-05-20 17:47:50	2488.35		5.40631	0
2022-05-20 17:47:55	2246.15		5.40631	0
2022-05-20 17:48:00	2185.24		5.40631	0
2022-05-20 17:48:05	2252.3		5.40631	0
2022-05-20 17:48:10	2247.73		5.40631	0
2022-05-20 17:48:15	2144.14		5.40631	0
2022-05-20 17:48:20	2073.19		5.40631	0
2022-05-20 17:48:25	2105.41		5.40631	0
2022-05-20 17:48:30	2206.33		5.40631	0
2022-05-20 17:48:35	2110.97		5.40631	0
2022-05-20 17:48:40	2077.91		5.40631	0
2022-05-20 17:48:45	2240.49		5.40631	0
2022-05-20 17:48:50	2289.22		5.40631	0
2022-05-20 17:48:55	2194.84		5.40631	0
2022-05-20 17:49:00	2238.89		5.40631	0
2022-05-20 17:49:05	2311.7		5.40631	0
2022-05-20 17:49:10	2497.26		5.40631	0
2022-05-20 17:49:15	2556.62		5.40631	0
2022-05-20 17:49:20	2612.28		5.40631	0
2022-05-20 17:49:25	2598.27		5.40631	0
2022-05-20 17:49:30	2609.8		5.40631	0
2022-05-20 17:49:35	2537.35		5.40631	0
2022-05-20 17:49:40	2543.64		5.40631	0
2022-05-20 17:49:45	2563.02		5.40631	0
2022-05-20 17:49:50	2562.95		5.40631	0
2022-05-20 17:49:55	2442.93		5.40631	0
2022-05-20 17:50:00	2303.76		5.40631	0
2022-05-20 17:50:05	2123.46		5.40631	0
2022-05-20 17:50:10	2018.82		5.40631	0
2022-05-20 17:50:15	1973.54		5.40631	0
2022-05-20 17:50:20	2061.86		5.40631	0
2022-05-20 17:50:25	2207		5.40631	0
2022-05-20 17:50:30	2063.84		5.40631	0
2022-05-20 17:50:35	2014.57		5.40631	0
2022-05-20 17:50:40	2023.1		5.40631	0
2022-05-20 17:50:45	1974.45		5.40631	0
2022-05-20 17:50:50	1834.89		5.40631	0
2022-05-20 17:50:55	1832.2		5.40631	0
2022-05-20 17:51:00	1875.51		5.40631	0
2022-05-20 17:51:05	2094.44		5.40631	0
2022-05-20 17:51:10	2180.47		5.40631	0
2022-05-20 17:51:15	2216.57		5.40631	0
2022-05-20 17:51:20	2541.98		5.40631	0
2022-05-20 17:51:25	2422.01		5.40631	0
2022-05-20 17:51:30	2418.34		5.40631	0
2022-05-20 17:51:35	2601.33		5.40631	0
2022-05-20 17:51:40	2691.95		5.40631	0
2022-05-20 17:51:45	2836.7		5.40631	0
2022-05-20 17:51:50	2641.6		5.40631	0
2022-05-20 17:51:55	2574.51		5.40631	0
2022-05-20 17:52:00	2511.94		5.40631	0
2022-05-20 17:52:05	2472.83		5.40631	0
2022-05-20 17:52:10	2497.65		5.40631	0
2022-05-20 17:52:15	2429		5.40631	0
2022-05-20 17:52:20	2320.83		5.40631	0
2022-05-20 17:52:25	2140.6		5.40631	0
2022-05-20 17:52:30	2054.09		5.40631	0
2022-05-20 17:52:35	1969.95		5.40631	0
2022-05-20 17:52:40	2138.11		5.40631	0
2022-05-20 17:52:45	2277.83		5.40631	0
2022-05-20 17:52:50	2516.24		5.40631	0
2022-05-20 17:52:55	2558.66		5.40631	0
2022-05-20 17:53:00	2521.26		5.40631	0
2022-05-20 17:53:05	2481.88		5.40631	0
2022-05-20 17:53:10	2406.34		5.40631	0
2022-05-20 17:53:15	2370.46		5.40631	0
2022-05-20 17:53:20	2371.51		5.40631	0
2022-05-20 17:53:25	2444.49		5.40631	0
2022-05-20 17:53:30	2479.89		5.40631	0
2022-05-20 17:53:35	2499.07		5.40631	0
2022-05-20 17:53:40	2462.44		5.40631	0
2022-05-20 17:53:45	2307.91		5.40631	0
2022-05-20 17:53:50	2332.47		5.40631	0
2022-05-20 17:53:55	2399.79		5.40631	0
2022-05-20 17:54:00	2361.65		5.40631	0
2022-05-20 17:54:05	2259.97		5.40631	0
2022-05-20 17:54:10	2100.1		5.40631	0
2022-05-20 17:54:15	1883.46		5.40631	0
2022-05-20 17:54:20	1854.83		5.40631	0
2022-05-20 17:54:25	2004.33		5.40631	0
2022-05-20 17:54:30	2079.68		5.40631	0
2022-05-20 17:54:35	1990.51		5.40631	0
2022-05-20 17:54:40	1886.42		5.40631	0
2022-05-20 17:54:45	1822.21		5.40631	0
2022-05-20 17:54:50	1935.29		5.40631	0
2022-05-20 17:54:55	2110.17		5.40631	0
2022-05-20 17:55:00	2135.73		5.40631	0
2022-05-20 17:55:05	2196.08		5.40631	0
2022-05-20 17:55:10	2213.9		5.40631	0
2022-05-20 17:55:15	2305.45		5.40631	0
2022-05-20 17:55:20	2424.7		5.40631	0
2022-05-20 17:55:25	2372.99		5.40631	0
2022-05-20 17:55:30	2346.99		5.40631	0
2022-05-20 17:55:35	2407.38		5.40631	0
2022-05-20 17:55:40	2343.47		5.40631	0
2022-05-20 17:55:45	2304.23		5.40631	0
2022-05-20 17:55:50	2242.31		5.40631	0
2022-05-20 17:55:55	2151.02		5.40631	0
2022-05-20 17:56:00	1995.39		5.40631	0
2022-05-20 17:56:05	1868.48		5.40631	0
2022-05-20 17:56:10	1801.85		5.40631	0
2022-05-20 17:56:15	1864.36		5.40631	0
2022-05-20 17:56:20	1933.96		5.40631	0
2022-05-20 17:56:25	2066.7		5.40631	0
2022-05-20 17:56:30	1993.4		5.40631	0
2022-05-20 17:56:35	2140.98		5.40631	0
2022-05-20 17:56:40	2119.03		5.40631	0
2022-05-20 17:56:45	2169.51		5.40631	0
2022-05-20 17:56:50	2104.48		5.40631	0
2022-05-20 17:56:55	1873.46		5.40631	0
2022-05-20 17:57:00	1721.56		5.40631	0
2022-05-20 17:57:05	1579.25		5.40631	0
2022-05-20 17:57:10	1447.13		5.40631	0
2022-05-20 17:57:15	1253.32		5.40631	0
2022-05-20 17:57:20	1163.82		5.40631	0
2022-05-20 17:57:25	1019.71		5.40631	0
2022-05-20 17:57:30	1262.57		5.40631	0
2022-05-20 17:57:35	1420.89		5.40631	0
2022-05-20 17:57:40	1698.25		5.40631	0
2022-05-20 17:57:45	1653.58		5.40631	0
2022-05-20 17:57:50	1832.48		5.40631	0
2022-05-20 17:57:55	2053.32		5.40631	0
2022-05-20 17:58:00	2091.84		5.40631	0
2022-05-20 17:58:05	2366.61		5.40631	0
2022-05-20 17:58:10	2697.47		5.40631	0
2022-05-20 17:58:15	3049.82		5.40631	0
2022-05-20 17:58:20	2892.2		5.40631	0
2022-05-20 17:58:25	3024.01		5.40631	0
2022-05-20 17:58:30	2838.98		5.40631	0
2022-05-20 17:58:35	2760.73		5.40631	0
2022-05-20 17:58:40	2626.22		5.40631	0
2022-05-20 17:58:45	2666.24		5.40631	0
2022-05-20 17:58:50	2474.77		5.40631	0
2022-05-20 17:58:55	2115.45		5.40631	0
2022-05-20 17:59:00	1995.25		5.40631	0
2022-05-20 17:59:05	2116.63		5.40631	0
2022-05-20 17:59:10	2114.63		5.40631	0
2022-05-20 17:59:15	2160.96		5.40631	0
2022-05-20 17:59:20	2121.96		5.40631	0
2022-05-20 17:59:25	1891.29		5.40631	0
2022-05-20 17:59:30	1880.58		5.40631	0
2022-05-20 17:59:35	1919.83		5.40631	0
2022-05-20 17:59:40	2057.58		5.40631	0
2022-05-20 17:59:45	1984.47		5.40631	0
2022-05-20 17:59:50	1983.76		5.40631	0
2022-05-20 17:59:55	1960.43		5.40631	0
2022-05-20 18:00:05	2243.88		5.40631	0
2022-05-20 18:00:10	2194.38		5.40631	0
2022-05-20 18:00:15	2163.79		5.40631	0
2022-05-20 18:00:20	2442.94		5.40631	0
2022-05-20 18:00:25	2889.65		5.40631	0
2022-05-20 18:00:30	2962.74		5.40631	0
2022-05-20 18:00:35	3040.93		5.40631	0
2022-05-20 18:00:40	3183.26		5.40631	0
2022-05-20 18:00:45	3313.7		5.40631	0
2022-05-20 18:00:50	3218.89		5.40631	0
2022-05-20 18:00:55	3046.02		5.40631	0
2022-05-20 18:01:00	3086.99		5.40631	0
2022-05-20 18:01:05	2943.51		5.40631	0
2022-05-20 18:01:10	2680.91		5.40631	0
2022-05-20 18:01:15	2376.29		5.40631	0
2022-05-20 18:01:20	1784.1		5.40631	0
2022-05-20 18:01:25	1461.72		5.40631	0
2022-05-20 18:01:30	1257.37		5.40631	0
2022-05-20 18:01:35	1178.84		5.40631	0
2022-05-20 18:01:40	1399.18		5.40631	0
2022-05-20 18:01:45	1386.79		5.40631	0
2022-05-20 18:01:50	1285.29		5.40631	0
2022-05-20 18:01:55	1271.25		5.40631	0
2022-05-20 18:02:00	1414.39		5.40631	0
2022-05-20 18:02:05	1408.94		5.40631	0
2022-05-20 18:02:10	1473.37		5.40631	0
2022-05-20 18:02:15	1565.41		5.40631	0
2022-05-20 18:02:20	1718.15		5.40631	0
2022-05-20 18:02:25	1906.82		5.40631	0
2022-05-20 18:02:30	1984.99		5.40631	0
2022-05-20 18:02:35	1908.38		5.40631	0
2022-05-20 18:02:40	1944.85		5.40631	0
2022-05-20 18:02:45	1922.18		5.40631	0
2022-05-20 18:02:50	1911.25		5.40631	0
2022-05-20 18:02:55	1981.1		5.40631	0
2022-05-20 18:03:00	1998.52		5.40631	0
2022-05-20 18:03:05	1979.56		5.40631	0
2022-05-20 18:03:10	2020.31		5.40631	0
2022-05-20 18:03:15	2142.62		5.40631	0
2022-05-20 18:03:20	2256.51		5.40631	0
2022-05-20 18:03:25	2344.91		5.40631	0
2022-05-20 18:03:30	2442.16		5.40631	0
2022-05-20 18:03:35	2570.34		5.40631	0
2022-05-20 18:03:40	2614.1		5.40631	0
2022-05-20 18:03:45	2587.85		5.40631	0
2022-05-20 18:03:50	2594.32		5.40631	0
2022-05-20 18:03:55	2575.49		5.40631	0
2022-05-20 18:04:00	2616.12		5.40631	0
2022-05-20 18:04:05	2356.34		5.40631	0
2022-05-20 18:04:10	2077.47		5.40631	0
2022-05-20 18:04:15	2131.24		5.40631	0
2022-05-20 18:04:20	2007.03		5.40631	0
2022-05-20 18:04:25	1948.8		5.40631	0
2022-05-20 18:04:30	1988.7		5.40631	0
2022-05-20 18:04:35	1865.29		5.40631	0
2022-05-20 18:04:40	1915.9		5.40631	0
2022-05-20 18:04:45	2108.56		5.40631	0
2022-05-20 18:04:50	2115.7		5.40631	0
2022-05-20 18:04:55	2139.45		5.40631	0
2022-05-20 18:05:00	2097.52		5.40631	0
2022-05-20 18:05:05	2066.23		5.40631	0
2022-05-20 18:05:10	2059.54		5.40631	0
2022-05-20 18:05:15	2158.62		5.56532	0
2022-05-20 18:05:20	2065.9		5.56532	0
2022-05-20 18:05:25	1906.46		5.56532	0
2022-05-20 18:05:30	1852.73		5.56532	0
2022-05-20 18:05:35	1869.83		5.56532	0
2022-05-20 18:05:40	2075.83		5.56532	0
2022-05-20 18:05:45	2196.15		5.56532	0
2022-05-20 18:05:50	2081.22		5.56532	0
2022-05-20 18:05:55	2084.59		5.56532	0
2022-05-20 18:06:00	2021.34		5.56532	0
2022-05-20 18:06:05	2073.4		5.56532	0
2022-05-20 18:06:10	1741.84		5.56532	0
2022-05-20 18:06:15	1724.42		5.56532	0
2022-05-20 18:06:20	1619.04		5.56532	0
2022-05-20 18:06:25	1544.95		5.56532	0
2022-05-20 18:06:30	1479.7		5.56532	0
2022-05-20 18:06:35	1341.46		5.56532	0
2022-05-20 18:06:40	1379.92		5.56532	0
2022-05-20 18:06:45	1576.94		5.56532	0
2022-05-20 18:06:50	1783		5.56532	0
2022-05-20 18:06:55	1649.28		5.56532	0
2022-05-20 18:07:00	1649.82		5.56532	0
2022-05-20 18:07:05	1803.9		5.56532	0
2022-05-20 18:07:10	1749.3		5.56532	0
2022-05-20 18:07:15	1584		5.56532	0
2022-05-20 18:07:20	1521.43		5.56532	0
2022-05-20 18:07:25	1544.38		5.56532	0
2022-05-20 18:07:30	1605.5		5.56532	0
2022-05-20 18:07:35	1660.86		5.56532	0
2022-05-20 18:07:40	1637.78		5.56532	0
2022-05-20 18:07:45	1837.27		5.56532	0
2022-05-20 18:07:50	1815.45		5.56532	0
2022-05-20 18:07:55	1752.3		5.56532	0
2022-05-20 18:08:00	1669.45		5.56532	0
2022-05-20 18:08:05	1727.64		5.56532	0
2022-05-20 18:08:10	1749.58		5.56532	0
2022-05-20 18:08:15	1654.05		5.56532	0
2022-05-20 18:08:20	1695.97		5.56532	0
2022-05-20 18:08:25	1694.54		5.56532	0
2022-05-20 18:08:30	1704.04		5.56532	0
2022-05-20 18:08:35	1669.31		5.56532	0
2022-05-20 18:08:40	1725.97		5.56532	0
2022-05-20 18:08:45	1869.35		5.56532	0
2022-05-20 18:08:50	2082.2		5.56532	0
2022-05-20 18:08:55	2209.5		5.56532	0
2022-05-20 18:09:00	2300.62		5.56532	0
2022-05-20 18:09:05	2325		5.56532	0
2022-05-20 18:09:10	2272.78		5.56532	0
2022-05-20 18:09:15	2243.61		5.56532	0
2022-05-20 18:09:20	2456.64		5.56532	0
2022-05-20 18:09:25	2407.77		5.56532	0
2022-05-20 18:09:30	2331.47		5.56532	0
2022-05-20 18:09:35	2205		5.56532	0
2022-05-20 18:09:40	1927.31		5.56532	0
2022-05-20 18:09:45	1719.5		5.56532	0
2022-05-20 18:09:50	1626.45		5.56532	0
2022-05-20 18:09:55	1529.74		5.56532	0
2022-05-20 18:10:00	1541.52		5.56532	0
2022-05-20 18:10:05	1457.05		5.56532	0
2022-05-20 18:10:10	1480.07		5.56532	0
2022-05-20 18:10:15	1562.42		5.56532	0
2022-05-20 18:10:20	1657.25		5.56532	0
2022-05-20 18:10:25	1949.98		5.56532	0
2022-05-20 18:10:30	2136.11		5.56532	0
2022-05-20 18:10:35	2047.51		5.56532	0
2022-05-20 18:10:40	1738.02		5.56532	0
2022-05-20 18:10:45	1503.26		5.56532	0
2022-05-20 18:10:50	1525.05		5.56532	0
2022-05-20 18:10:55	1647.89		5.56532	0
2022-05-20 18:11:00	1773.91		5.56532	0
2022-05-20 18:11:05	1819.97		5.56532	0
2022-05-20 18:11:10	2037.17		5.56532	0
2022-05-20 18:11:15	1952.9		5.56532	0
2022-05-20 18:11:20	2020.17		5.56532	0
2022-05-20 18:11:25	2003.72		5.56532	0
2022-05-20 18:11:30	2015.76		5.56532	0
2022-05-20 18:11:35	2052.97		5.56532	0
2022-05-20 18:11:40	2078.86		5.56532	0
2022-05-20 18:11:45	1989.66		5.56532	0
2022-05-20 18:11:50	1877.25		5.56532	0
2022-05-20 18:11:55	1811.06		5.56532	0
2022-05-20 18:12:00	1827.85		5.56532	0
2022-05-20 18:12:05	1987.62		5.56532	0
2022-05-20 18:12:10	2125.88		5.56532	0
2022-05-20 18:12:15	2055.95		5.56532	0
2022-05-20 18:12:20	2347.15		5.56532	0
2022-05-20 18:12:25	2281.55		5.56532	0
2022-05-20 18:12:30	2347.75		5.56532	0
2022-05-20 18:12:35	2168.14		5.56532	0
2022-05-20 18:12:40	2223.04		5.56532	0
2022-05-20 18:12:45	2326.22		5.56532	0
2022-05-20 18:12:50	2262.42		5.56532	0
2022-05-20 18:12:55	2440.42		5.56532	0
2022-05-20 18:13:00	2647.15		5.56532	0
2022-05-20 18:13:05	2791.56		5.56532	0
2022-05-20 18:13:10	2896.57		5.56532	0
2022-05-20 18:13:15	2963.76		5.56532	0
2022-05-20 18:13:20	2994.87		5.56532	0
2022-05-20 18:13:25	2958.37		5.56532	0
2022-05-20 18:13:30	2884.09		5.56532	0
2022-05-20 18:13:35	2873.3		5.56532	0
2022-05-20 18:13:40	2916.67		5.56532	0
2022-05-20 18:13:45	2879.37		5.56532	0
2022-05-20 18:13:50	2815.55		5.56532	0
2022-05-20 18:13:55	2659.57		5.56532	0
2022-05-20 18:14:00	2519.69		5.56532	0
2022-05-20 18:14:05	2336.42		5.56532	0
2022-05-20 18:14:10	2149.21		5.56532	0
2022-05-20 18:14:15	2243.54		5.56532	0
2022-05-20 18:14:20	2316.06		5.56532	0
2022-05-20 18:14:25	2325.6		5.56532	0
2022-05-20 18:14:30	2474.32		5.56532	0
2022-05-20 18:14:35	2349.41		5.56532	0
2022-05-20 18:14:40	2174.34		5.56532	0
2022-05-20 18:14:45	1974.25		5.56532	0
2022-05-20 18:14:50	2018.1		5.56532	0
2022-05-20 18:14:55	2252.22		5.56532	0
2022-05-20 18:15:00	2483.97		5.56532	0
2022-05-20 18:15:05	2561.33		5.56532	0
2022-05-20 18:15:10	2713		5.56532	0
2022-05-20 18:15:15	2912.56		5.56532	0
2022-05-20 18:15:20	2888.32		5.56532	0
2022-05-20 18:15:25	2808.48		5.56532	0
2022-05-20 18:15:30	2984.72		5.56532	0
2022-05-20 18:15:35	3226.14		5.56532	0
2022-05-20 18:15:40	3329.78		5.56532	0
2022-05-20 18:15:45	2931.88		5.56532	0
2022-05-20 18:15:50	2875.95		5.56532	0
2022-05-20 18:15:55	2714.24		5.56532	0
2022-05-20 18:16:00	2782.03		5.56532	0
2022-05-20 18:16:05	2717.79		5.56532	0
2022-05-20 18:16:10	2767.18		5.56532	0
2022-05-20 18:16:15	2856.53		5.56532	0
2022-05-20 18:16:20	2783.69		5.56532	0
2022-05-20 18:16:25	2718.97		5.56532	0
2022-05-20 18:16:30	2724.38		5.56532	0
2022-05-20 18:16:35	2809.74		5.56532	0
2022-05-20 18:16:40	3115.77		5.56532	0
2022-05-20 18:16:45	3185.92		5.56532	0
2022-05-20 18:16:50	2933.62		5.56532	0
2022-05-20 18:16:55	2841.74		5.56532	0
2022-05-20 18:17:00	2700.21		5.56532	0
2022-05-20 18:17:05	2653.24		5.56532	0
2022-05-20 18:17:10	2572.3		5.56532	0
2022-05-20 18:17:15	2491.22		5.56532	0
2022-05-20 18:17:20	2617.58		5.56532	0
2022-05-20 18:17:25	2800.55		5.56532	0
2022-05-20 18:17:30	3064.48		5.56532	0
2022-05-20 18:17:35	3129.98		5.56532	0
2022-05-20 18:17:40	3218.15		5.56532	0
2022-05-20 18:17:45	3219.44		5.56532	0
2022-05-20 18:17:50	3130.12		5.56532	0
2022-05-20 18:17:55	2916.82		5.56532	0
2022-05-20 18:18:00	2713.89		5.56532	0
2022-05-20 18:18:05	2670.34		5.56532	0
2022-05-20 18:18:10	2780.81		5.56532	0
2022-05-20 18:18:15	2918.88		5.56532	0
2022-05-20 18:18:20	2943.22		5.56532	0
2022-05-20 18:18:25	2651.43		5.56532	0
2022-05-20 18:18:30	2563.84		5.56532	0
2022-05-20 18:18:35	2571.08		5.56532	0
2022-05-20 18:18:40	2553.9		5.56532	0
2022-05-20 18:18:45	2990.22		5.56532	0
2022-05-20 18:18:50	3161.86		5.56532	0
2022-05-20 18:18:55	3166.36		5.56532	0
2022-05-20 18:19:00	3047.37		5.56532	0
2022-05-20 18:19:05	2811.91		5.56532	0
2022-05-20 18:19:10	2692.95		5.56532	0
2022-05-20 18:19:15	2536.51		5.56532	0
2022-05-20 18:19:20	2408.37		5.56532	0
2022-05-20 18:19:25	2430.43		5.56532	0
2022-05-20 18:19:30	2468.85		5.56532	0
2022-05-20 18:19:35	2417.95		5.56532	0
2022-05-20 18:19:40	2520.75		5.56532	0
2022-05-20 18:19:45	2612.11		5.56532	0
2022-05-20 18:19:50	2908.47		5.56532	0
2022-05-20 18:19:55	3168.03		5.56532	0
2022-05-20 18:20:00	3323.15		5.56532	0
2022-05-20 18:20:05	3138.75		5.56532	0
2022-05-20 18:20:10	3236.47		5.56532	0
2022-05-20 18:20:15	2994.63		5.56532	0
2022-05-20 18:20:20	2808.64		5.56532	0
2022-05-20 18:20:25	2743.14		5.56532	0
2022-05-20 18:20:30	2785.8		5.56532	0
2022-05-20 18:20:35	2879.73		5.56532	0
2022-05-20 18:20:40	2899.83		5.56532	0
2022-05-20 18:20:45	2992.86		5.56532	0
2022-05-20 18:20:50	3039.27		5.56532	0
2022-05-20 18:20:55	2951.11		5.56532	0
2022-05-20 18:21:00	2664.54		5.56532	0
2022-05-20 18:21:05	2523.13		5.56532	0
2022-05-20 18:21:10	2401.38		5.56532	0
2022-05-20 18:21:15	2320.27		5.56532	0
2022-05-20 18:21:20	2317.7		5.56532	0
2022-05-20 18:21:25	2349.48		5.56532	0
2022-05-20 18:21:30	2434.24		5.56532	0
2022-05-20 18:21:35	2426.8		5.56532	0
2022-05-20 18:21:40	2512.62		5.56532	0
2022-05-20 18:21:45	2404.98		5.56532	0
2022-05-20 18:21:50	2401.55		5.56532	0
2022-05-20 18:21:55	2480.18		5.56532	0
2022-05-20 18:22:00	2642.65		5.56532	0
2022-05-20 18:22:05	2800.21		5.56532	0
2022-05-20 18:22:10	2714.89		5.56532	0
2022-05-20 18:22:15	2592.95		5.56532	0
2022-05-20 18:22:20	2453.27		5.56532	0
2022-05-20 18:22:25	2333.15		5.56532	0
2022-05-20 18:22:30	2347.89		5.56532	0
2022-05-20 18:22:35	2351.26		5.56532	0
2022-05-20 18:22:40	2391.11		5.56532	0
2022-05-20 18:22:45	2179.73		5.56532	0
2022-05-20 18:22:50	1942.04		5.56532	0
2022-05-20 18:22:55	1824.68		5.56532	0
2022-05-20 18:23:00	1976.92		5.56532	0
2022-05-20 18:23:05	2288.9		5.56532	0
2022-05-20 18:23:10	2436.75		5.56532	0
2022-05-20 18:23:15	2581.91		5.56532	0
2022-05-20 18:23:20	2479.11		5.56532	0
2022-05-20 18:23:25	2250.43		5.56532	0
2022-05-20 18:23:30	2127.86		5.56532	0
2022-05-20 18:23:35	2070.31		5.56532	0
2022-05-20 18:23:40	2015.21		5.56532	0
2022-05-20 18:23:45	2119.38		5.56532	0
2022-05-20 18:23:50	2145.75		5.56532	0
2022-05-20 18:23:55	1884.77		5.56532	0
2022-05-20 18:24:00	1654.93		5.56532	0
2022-05-20 18:24:05	1690.09		5.56532	0
2022-05-20 18:24:10	1576.53		5.56532	0
2022-05-20 18:24:15	1554.65		5.56532	0
2022-05-20 18:24:20	1559.16		5.56532	0
2022-05-20 18:24:25	1623.7		5.56532	0
2022-05-20 18:24:30	1870.72		5.56532	0
2022-05-20 18:24:35	2043.17		5.56532	0
2022-05-20 18:24:40	2304.47		5.56532	0
2022-05-20 18:24:45	2362.46		5.56532	0
2022-05-20 18:24:50	2521.42		5.56532	0
2022-05-20 18:24:55	2384.81		5.56532	0
2022-05-20 18:25:00	2367.03		5.56532	0
2022-05-20 18:25:05	2390.32		5.56532	0
2022-05-20 18:25:10	2544.37		5.56532	0
2022-05-20 18:25:15	2497.64		5.56532	0
2022-05-20 18:25:20	2503.79		5.56532	0
2022-05-20 18:25:25	2502.58		5.56532	0
2022-05-20 18:25:30	2499.72		5.56532	0
2022-05-20 18:25:35	2685.25		5.56532	0
2022-05-20 18:25:40	2824.18		5.56532	0
2022-05-20 18:25:45	2979.64		5.56532	0
2022-05-20 18:25:50	3136.21		5.56532	0
2022-05-20 18:25:55	3096.2		5.56532	0
2022-05-20 18:26:00	3124.12		5.56532	0
2022-05-20 18:26:05	3160.4		5.56532	0
2022-05-20 18:26:10	3075.75		5.56532	0
2022-05-20 18:26:15	2866.74		5.56532	0
2022-05-20 18:26:20	3005.82		5.56532	0
2022-05-20 18:26:25	2927.21		5.56532	0
2022-05-20 18:26:30	2822.64		5.56532	0
2022-05-20 18:26:35	2732.79		5.56532	0
2022-05-20 18:26:40	2515.19		5.56532	0
2022-05-20 18:26:45	2410.19		5.56532	0
2022-05-20 18:26:50	2449.64		5.56532	0
2022-05-20 18:26:55	2373.18		5.56532	0
2022-05-20 18:27:00	2351.27		5.56532	0
2022-05-20 18:27:05	2230.09		5.56532	0
2022-05-20 18:27:10	1987.13		5.56532	0
2022-05-20 18:27:15	2035.52		5.56532	0
2022-05-20 18:27:20	1956.76		5.56532	0
2022-05-20 18:27:25	2275.39		5.56532	0
2022-05-20 18:27:30	2322.11		5.56532	0
2022-05-20 18:27:35	2349		5.56532	0
2022-05-20 18:27:40	2432.53		5.56532	0
2022-05-20 18:27:45	2483.91		5.56532	0
2022-05-20 18:27:50	2253.38		5.56532	0
2022-05-20 18:27:55	2027.79		5.56532	0
2022-05-20 18:28:00	1836.28		5.56532	0
2022-05-20 18:28:05	1790.07		5.56532	0
2022-05-20 18:28:10	1746.29		5.56532	0
2022-05-20 18:28:15	1926.51		5.56532	0
2022-05-20 18:28:20	1987.77		5.56532	0
2022-05-20 18:28:25	2246.82		5.56532	0
2022-05-20 18:28:30	2530.19		5.56532	0
2022-05-20 18:28:35	2613.15		5.56532	0
2022-05-20 18:28:40	2883.8		5.56532	0
2022-05-20 18:28:45	2908.25		5.56532	0
2022-05-20 18:28:50	2654.68		5.56532	0
2022-05-20 18:28:55	2570.03		5.56532	0
2022-05-20 18:29:00	2401.41		5.56532	0
2022-05-20 18:29:05	2250.26		5.56532	0
2022-05-20 18:29:10	2033.38		5.56532	0
2022-05-20 18:29:15	2012.96		5.56532	0
2022-05-20 18:29:20	2002.99		5.56532	0
2022-05-20 18:29:25	2029.46		5.56532	0
2022-05-20 18:29:30	2016.34		5.56532	0
2022-05-20 18:29:35	2166.5		5.56532	0
2022-05-20 18:29:40	2324.18		5.56532	0
2022-05-20 18:29:45	2427.73		5.56532	0
2022-05-20 18:29:50	2163.83		5.56532	0
2022-05-20 18:29:55	2153.78		5.56532	0
2022-05-20 18:30:00	2177.74		5.56532	0
2022-05-20 18:30:05	2187.93		5.56532	0
2022-05-20 18:30:10	2290.38		5.56532	0
2022-05-20 18:30:15	2313.45		5.56532	0
2022-05-20 18:30:20	2412.64		5.56532	0
2022-05-20 18:30:25	2414.74		5.56532	0
2022-05-20 18:30:30	2472.32		5.56532	0
2022-05-20 18:30:35	2188.47		5.56532	0
2022-05-20 18:30:40	2341.44		5.56532	0
2022-05-20 18:30:45	2380.42		5.56532	0
2022-05-20 18:30:50	2670.36		5.56532	0
2022-05-20 18:30:55	2905.16		5.56532	0
2022-05-20 18:31:00	3004.63		5.56532	0
2022-05-20 18:31:05	3007.29		5.56532	0
2022-05-20 18:31:10	3205.91		5.56532	0
2022-05-20 18:31:15	3360.83		5.56532	0
2022-05-20 18:31:20	3365.76		5.56532	0
2022-05-20 18:31:25	3220.22		5.56532	0
2022-05-20 18:31:30	3303.36		5.56532	0
2022-05-20 18:31:35	3542.91		5.56532	0
2022-05-20 18:31:40	3554.71		5.56532	0
2022-05-20 18:31:45	3528.85		5.56532	0
2022-05-20 18:31:50	3295.76		5.56532	0
2022-05-20 18:31:55	3369.14		5.56532	0
2022-05-20 18:32:00	3215.08		5.56532	0
2022-05-20 18:32:05	3233.81		5.56532	0
2022-05-20 18:32:10	3043.18		5.56532	0
2022-05-20 18:32:15	2853.23		5.56532	0
2022-05-20 18:32:20	2759.63		5.56532	0
2022-05-20 18:32:25	2677		5.56532	0
2022-05-20 18:32:30	2424.38		5.56532	0
2022-05-20 18:32:35	2261.99		5.56532	0
2022-05-20 18:32:40	2173.26		5.56532	0
2022-05-20 18:32:45	2158.26		5.56532	0
2022-05-20 18:32:50	2212.98		5.56532	0
2022-05-20 18:32:55	2107.27		5.56532	0
2022-05-20 18:33:00	2107.22		5.56532	0
2022-05-20 18:33:05	2022.78		5.56532	0
2022-05-20 18:33:10	2118.53		5.56532	0
2022-05-20 18:33:15	2146.78		5.56532	0
2022-05-20 18:33:20	2439.18		5.56532	0
2022-05-20 18:33:25	2744.31		5.56532	0
2022-05-20 18:33:30	2938.34		5.56532	0
2022-05-20 18:33:35	3033.08		5.56532	0
2022-05-20 18:33:40	2899.43		5.56532	0
2022-05-20 18:33:45	2951.62		5.56532	0
2022-05-20 18:33:50	3016.14		5.56532	0
2022-05-20 18:33:55	3134.73		5.56532	0
2022-05-20 18:34:00	3185.33		5.56532	0
2022-05-20 18:34:05	3103.02		5.56532	0
2022-05-20 18:34:10	2912.71		5.56532	0
2022-05-20 18:34:15	2714.09		5.56532	0
2022-05-20 18:34:20	2518.98		5.56532	0
2022-05-20 18:34:25	2474.67		5.56532	0
2022-05-20 18:34:30	2612.15		5.56532	0
2022-05-20 18:34:35	2466.02		5.56532	0
2022-05-20 18:34:40	2440.72		5.56532	0
2022-05-20 18:34:45	2439.35		5.56532	0
2022-05-20 18:34:50	2502.37		5.56532	0
2022-05-20 18:34:55	2494.16		5.56532	0
2022-05-20 18:35:00	2716.37		5.56532	0
2022-05-20 18:35:05	2795.61		5.56532	0
2022-05-20 18:35:10	2950.91		5.56532	0
2022-05-20 18:35:15	3785.77		6.52486	0
2022-05-20 18:35:20	3676.25		6.52486	0
2022-05-20 18:35:25	3679.21		6.52486	0
2022-05-20 18:35:30	3360.08		6.52486	0
2022-05-20 18:35:35	3240.69		6.52486	0
2022-05-20 18:35:40	3174.01		6.52486	0
2022-05-20 18:35:45	2917		6.52486	0
2022-05-20 18:35:50	2635.32		6.52486	0
2022-05-20 18:35:55	2762.96		6.52486	0
2022-05-20 18:36:00	2767.36		6.52486	0
2022-05-20 18:36:05	2571.8		6.52486	0
2022-05-20 18:36:10	2638.93		6.52486	0
2022-05-20 18:36:15	2684.43		6.52486	0
2022-05-20 18:36:20	2643.38		6.52486	0
2022-05-20 18:36:25	2657.24		6.52486	0
2022-05-20 18:36:30	2673.74		6.52486	0
2022-05-20 18:36:35	2638.17		6.52486	0
2022-05-20 18:36:40	2694.08		6.52486	0
2022-05-20 18:36:45	2727.71		6.52486	0
2022-05-20 18:36:50	2874.74		6.52486	0
2022-05-20 18:36:55	2983.38		6.52486	0
2022-05-20 18:37:00	2987.26		6.52486	0
2022-05-20 18:37:05	2895.29		6.52486	0
2022-05-20 18:37:10	2969.86		6.52486	0
2022-05-20 18:37:15	3152.47		6.52486	0
2022-05-20 18:37:20	3336.35		6.52486	0
2022-05-20 18:37:25	3128.07		6.52486	0
2022-05-20 18:37:30	3075.23		6.52486	0
2022-05-20 18:37:35	3140.14		6.52486	0
2022-05-20 18:37:40	3192.31		6.52486	0
2022-05-20 18:37:45	3260.76		6.52486	0
2022-05-20 18:37:50	3298.3		6.52486	0
2022-05-20 18:37:55	3317.46		6.52486	0
2022-05-20 18:38:00	3375.95		6.52486	0
2022-05-20 18:38:05	3436.98		6.52486	0
2022-05-20 18:38:10	3526.67		6.52486	0
2022-05-20 18:38:15	3552.12		6.52486	0
2022-05-20 18:38:20	3597.21		6.52486	0
2022-05-20 18:38:25	3530.32		6.52486	0
2022-05-20 18:38:30	3340.41		6.52486	0
2022-05-20 18:38:35	3245.25		6.52486	0
2022-05-20 18:38:40	3283.68		6.52486	0
2022-05-20 18:38:45	3236.64		6.52486	0
2022-05-20 18:38:50	3234.64		6.52486	0
2022-05-20 18:38:55	3292.99		6.52486	0
2022-05-20 18:39:00	3375.14		6.52486	0
2022-05-20 18:39:05	3434.75		6.52486	0
2022-05-20 18:39:10	3540.15		6.52486	0
2022-05-20 18:39:15	3765.58		6.52486	0
2022-05-20 18:39:20	3753.76		6.52486	0
2022-05-20 18:39:25	3807.45		6.52486	0
2022-05-20 18:39:30	3895.76		6.52486	0
2022-05-20 18:39:35	3845.29		6.52486	0
2022-05-20 18:39:40	3848.96		6.52486	0
2022-05-20 18:39:45	3695.33		6.52486	0
2022-05-20 18:39:50	3628.28		6.52486	0
2022-05-20 18:39:55	3473.34		6.52486	0
2022-05-20 18:40:00	3378.2		6.52486	0
2022-05-20 18:40:05	3278.9		6.52486	0
2022-05-20 18:40:10	3342.82		6.52486	0
2022-05-20 18:40:15	3311.04		6.52486	0
2022-05-20 18:40:20	3343.54		6.52486	0
2022-05-20 18:40:25	3402.55		6.52486	0
2022-05-20 18:40:30	3515.18		6.52486	0
2022-05-20 18:40:35	3516.61		6.52486	0
2022-05-20 18:40:40	3409.2		6.52486	0
2022-05-20 18:40:45	3279.87		6.52486	0
2022-05-20 18:40:50	3179.55		6.52486	0
2022-05-20 18:40:55	2984.81		6.52486	0
2022-05-20 18:41:00	2772.05		6.52486	0
2022-05-20 18:41:05	2964.97		6.52486	0
2022-05-20 18:41:10	2920.11		6.52486	0
2022-05-20 18:41:15	2714.54		6.52486	0
2022-05-20 18:41:20	2739.39		6.52486	0
2022-05-20 18:41:25	2577.31		6.52486	0
2022-05-20 18:41:30	2459.69		6.52486	0
2022-05-20 18:41:35	2443.69		6.52486	0
2022-05-20 18:41:40	2365.43		6.52486	0
2022-05-20 18:41:45	2383.33		6.52486	0
2022-05-20 18:41:50	2499.58		6.52486	0
2022-05-20 18:41:55	2581.62		6.52486	0
2022-05-20 18:42:00	2623.38		6.52486	0
2022-05-20 18:42:05	2538.97		6.52486	0
2022-05-20 18:42:10	2303.19		6.52486	0
2022-05-20 18:42:15	2183.73		6.52486	0
2022-05-20 18:42:20	2215.34		6.52486	0
2022-05-20 18:42:25	2079.44		6.52486	0
2022-05-20 18:42:30	1928.26		6.52486	0
2022-05-20 18:42:35	2022.09		6.52486	0
2022-05-20 18:42:40	2135.74		6.52486	0
2022-05-20 18:42:45	2181.43		6.52486	0
2022-05-20 18:42:50	2370.81		6.52486	0
2022-05-20 18:42:55	2185.13		6.52486	0
2022-05-20 18:43:00	2114.88		6.52486	0
2022-05-20 18:43:05	2066.55		6.52486	0
2022-05-20 18:43:10	2022.52		6.52486	0
2022-05-20 18:43:15	1802.99		6.52486	0
2022-05-20 18:43:20	1668.54		6.52486	0
2022-05-20 18:43:25	1779.98		6.52486	0
2022-05-20 18:43:30	1723.99		6.52486	0
2022-05-20 18:43:35	1770.22		6.52486	0
2022-05-20 18:43:40	1853.28		6.52486	0
2022-05-20 18:43:45	1898.89		6.52486	0
2022-05-20 18:43:50	1849.86		6.52486	0
2022-05-20 18:43:55	1974.75		6.52486	0
2022-05-20 18:44:00	1933.25		6.52486	0
2022-05-20 18:44:05	2024.35		6.52486	0
2022-05-20 18:44:10	2245.2		6.52486	0
2022-05-20 18:44:15	2434.8		6.52486	0
2022-05-20 18:44:20	2269.04		6.52486	0
2022-05-20 18:44:25	2246.86		6.52486	0
2022-05-20 18:44:30	2174.12		6.52486	0
2022-05-20 18:44:35	2178.44		6.52486	0
2022-05-20 18:44:40	2175.72		6.52486	0
2022-05-20 18:44:45	2103.66		6.52486	0
2022-05-20 18:44:50	1866.21		6.52486	0
2022-05-20 18:44:55	1776.01		6.52486	0
2022-05-20 18:45:00	2081.69		6.52486	0
2022-05-20 18:45:05	2345.41		6.52486	0
2022-05-20 18:45:10	2499.59		6.52486	0
2022-05-20 18:45:15	2583.75		6.52486	0
2022-05-20 18:45:20	2528.12		6.52486	0
2022-05-20 18:45:25	2572.81		6.52486	0
2022-05-20 18:45:30	2523.83		6.52486	0
2022-05-20 18:45:35	2712.75		6.52486	0
2022-05-20 18:45:40	2640.15		6.52486	0
2022-05-20 18:45:45	2534		6.52486	0
2022-05-20 18:45:50	2439.98		6.52486	0
2022-05-20 18:45:55	2394.66		6.52486	0
2022-05-20 18:46:00	2173.27		6.52486	0
2022-05-20 18:46:05	2226.66		6.52486	0
2022-05-20 18:46:10	2281.77		6.52486	0
2022-05-20 18:46:15	2406.75		6.52486	0
2022-05-20 18:46:20	2611.91		6.52486	0
2022-05-20 18:46:25	2707.77		6.52486	0
2022-05-20 18:46:30	2603.53		6.52486	0
2022-05-20 18:46:35	2622.39		6.52486	0
2022-05-20 18:46:40	2582.93		6.52486	0
2022-05-20 18:46:45	2614.81		6.52486	0
2022-05-20 18:46:50	2682.47		6.52486	0
2022-05-20 18:46:55	2759.83		6.52486	0
2022-05-20 18:47:00	2963.04		6.52486	0
2022-05-20 18:47:05	3207.98		6.52486	0
2022-05-20 18:47:10	3368.2		6.52486	0
2022-05-20 18:47:15	3431.12		6.52486	0
2022-05-20 18:47:20	3553.32		6.52486	0
2022-05-20 18:47:25	3579.91		6.52486	0
2022-05-20 18:47:30	3854.19		6.52486	0
2022-05-20 18:47:35	3873.84		6.52486	0
2022-05-20 18:47:40	3935.67		6.52486	0
2022-05-20 18:47:45	4124.9		6.52486	0
2022-05-20 18:47:50	4091.94		6.52486	0
2022-05-20 18:47:55	3923.32		6.52486	0
2022-05-20 18:48:00	3967.08		6.52486	0
2022-05-20 18:48:05	4015.03		6.52486	0
2022-05-20 18:48:10	4019.87		6.52486	0
2022-05-20 18:48:15	3879.1		6.52486	0
2022-05-20 18:48:20	3886.65		6.52486	0
2022-05-20 18:48:25	3758.94		6.52486	0
2022-05-20 18:48:30	3592.22		6.52486	0
2022-05-20 18:48:35	3361.75		6.52486	0
2022-05-20 18:48:40	3201.64		6.52486	0
2022-05-20 18:48:45	3429.12		6.52486	0
2022-05-20 18:48:50	3381.85		6.52486	0
2022-05-20 18:48:55	3023.43		6.52486	0
2022-05-20 18:49:00	2835.4		6.52486	0
2022-05-20 18:49:05	2673.95		6.52486	0
2022-05-20 18:49:10	2684.21		6.52486	0
2022-05-20 18:49:15	2766.2		6.52486	0
2022-05-20 18:49:20	2902.44		6.52486	0
2022-05-20 18:49:25	2900.66		6.52486	0
2022-05-20 18:49:30	2855.22		6.52486	0
2022-05-20 18:49:35	2758.05		6.52486	0
2022-05-20 18:49:40	2599.8		6.52486	0
2022-05-20 18:49:45	2651.34		6.52486	0
2022-05-20 18:49:50	2620.09		6.52486	0
2022-05-20 18:49:55	2501.35		6.52486	0
2022-05-20 18:50:00	2452.14		6.52486	0
2022-05-20 18:50:05	2431.35		6.52486	0
2022-05-20 18:50:10	2353.03		6.52486	0
2022-05-20 18:50:15	2374.37		6.52486	0
2022-05-20 18:50:20	2400.56		6.52486	0
2022-05-20 18:50:25	1997.68		6.52486	0
2022-05-20 18:50:30	1795.59		6.52486	0
2022-05-20 18:50:35	1963.73		6.52486	0
2022-05-20 18:50:40	2023.99		6.52486	0
2022-05-20 18:50:45	2059.08		6.52486	0
2022-05-20 18:50:50	2221.54		6.52486	0
2022-05-20 18:50:55	2614.96		6.52486	0
2022-05-20 18:51:00	2956.37		6.52486	0
2022-05-20 18:51:05	3193.81		6.52486	0
2022-05-20 18:51:10	3350.41		6.52486	0
2022-05-20 18:51:15	3491.87		6.52486	0
2022-05-20 18:51:20	3647.49		6.52486	0
2022-05-20 18:51:25	3703.27		6.52486	0
2022-05-20 18:51:30	3657.62		6.52486	0
2022-05-20 18:51:35	3550.08		6.52486	0
2022-05-20 18:51:40	3483.72		6.52486	0
2022-05-20 18:51:45	3376.86		6.52486	0
2022-05-20 18:51:50	3457.96		6.52486	0
2022-05-20 18:51:55	3368.44		6.52486	0
2022-05-20 18:52:00	3372.41		6.52486	0
2022-05-20 18:52:05	3163.97		6.52486	0
2022-05-20 18:52:10	3109.34		6.52486	0
[truncated: 5,113 more rows]

## Sheet: flow_glob LD not corrected
Date/Time [UTC]	_phi [g/s]	_phi_err	_velo_eff	_velo_eff_err	_frac_optflow_ok	_frac_optflow_ok_ica
2022-05-20 16:05:15	2776.54		7.0331	0
2022-05-20 16:05:20	2646.09		7.0331	0
2022-05-20 16:05:25	2695.44		7.0331	0
2022-05-20 16:05:30	2594.39		7.0331	0
2022-05-20 16:05:35	2695.04		7.0331	0
2022-05-20 16:05:40	2516.45		7.0331	0
2022-05-20 16:05:45	2635.99		7.0331	0
2022-05-20 16:05:50	2642.17		7.0331	0
2022-05-20 16:05:55	2510.44		7.0331	0
2022-05-20 16:06:00	2463.82		7.0331	0
2022-05-20 16:06:05	2349.52		7.0331	0
2022-05-20 16:06:10	2290.25		7.0331	0
2022-05-20 16:06:15	2312.4		7.0331	0
2022-05-20 16:06:20	2270.39		7.0331	0
2022-05-20 16:06:25	2041.84		7.0331	0
2022-05-20 16:06:30	1851.26		7.0331	0
2022-05-20 16:06:35	1762.92		7.0331	0
2022-05-20 16:06:40	1810.38		7.0331	0
2022-05-20 16:06:45	1920.71		7.0331	0
2022-05-20 16:06:50	1954.63		7.0331	0
2022-05-20 16:06:55	2141.17		7.0331	0
2022-05-20 16:07:00	2220.81		7.0331	0
2022-05-20 16:07:05	2217.05		7.0331	0
2022-05-20 16:07:10	2403.07		7.0331	0
2022-05-20 16:07:15	2476.46		7.0331	0
2022-05-20 16:07:20	2511.04		7.0331	0
2022-05-20 16:07:25	2716.69		7.0331	0
2022-05-20 16:07:30	2835.56		7.0331	0
2022-05-20 16:07:35	3060.72		7.0331	0
2022-05-20 16:07:40	3054.44		7.0331	0
2022-05-20 16:07:45	3047.57		7.0331	0
2022-05-20 16:07:50	2955.64		7.0331	0
2022-05-20 16:07:55	2892.26		7.0331	0
2022-05-20 16:08:00	2716.66		7.0331	0
2022-05-20 16:08:05	2606.94		7.0331	0
2022-05-20 16:08:10	2497.44		7.0331	0
2022-05-20 16:08:15	2284.24		7.0331	0
2022-05-20 16:08:20	2159.09		7.0331	0
2022-05-20 16:08:25	2068.47		7.0331	0
2022-05-20 16:08:30	2007.22		7.0331	0
2022-05-20 16:08:35	2202.22		7.0331	0
2022-05-20 16:08:40	2272.67		7.0331	0
2022-05-20 16:08:45	2398.98		7.0331	0
2022-05-20 16:08:50	2450.56		7.0331	0
2022-05-20 16:08:55	2465.81		7.0331	0
2022-05-20 16:09:00	2528.25		7.0331	0
2022-05-20 16:09:05	2587.44		7.0331	0
2022-05-20 16:09:10	2565.02		7.0331	0
2022-05-20 16:09:15	2397.26		7.0331	0
2022-05-20 16:09:20	2240.75		7.0331	0
2022-05-20 16:09:25	2147.05		7.0331	0
2022-05-20 16:09:30	2039.87		7.0331	0
2022-05-20 16:09:35	1975.76		7.0331	0
2022-05-20 16:09:40	2215.49		7.0331	0
2022-05-20 16:09:45	2221.22		7.0331	0
2022-05-20 16:09:50	2332.53		7.0331	0
2022-05-20 16:09:55	2265.86		7.0331	0
2022-05-20 16:10:00	2290.2		7.0331	0
2022-05-20 16:10:05	2346.55		7.0331	0
2022-05-20 16:10:10	2402.07		7.0331	0
2022-05-20 16:10:15	2698.93		7.0331	0
2022-05-20 16:10:20	2878.92		7.0331	0
2022-05-20 16:10:25	2716.05		7.0331	0
2022-05-20 16:10:30	2280.73		7.0331	0
2022-05-20 16:10:35	2201.3		7.0331	0
2022-05-20 16:10:40	2193.11		7.0331	0
2022-05-20 16:10:45	2181.92		7.0331	0
2022-05-20 16:10:50	2155.28		7.0331	0
2022-05-20 16:10:55	2649.59		7.0331	0
2022-05-20 16:11:00	2788.26		7.0331	0
2022-05-20 16:11:05	2760.18		7.0331	0
2022-05-20 16:11:10	2750.75		7.0331	0
2022-05-20 16:11:15	2750.61		7.0331	0
2022-05-20 16:11:20	2576.81		7.0331	0
2022-05-20 16:11:25	2493.99		7.0331	0
2022-05-20 16:11:30	2466.99		7.0331	0
2022-05-20 16:11:35	2513.9		7.0331	0
2022-05-20 16:11:40	2542.9		7.0331	0
2022-05-20 16:11:45	2479.59		7.0331	0
2022-05-20 16:11:50	2130		7.0331	0
2022-05-20 16:11:55	2013.46		7.0331	0
2022-05-20 16:12:00	2122.52		7.0331	0
2022-05-20 16:12:05	1875		7.0331	0
2022-05-20 16:12:10	1602.5		7.0331	0
2022-05-20 16:12:15	1457.96		7.0331	0
2022-05-20 16:12:20	1398.32		7.0331	0
2022-05-20 16:12:25	1298.93		7.0331	0
2022-05-20 16:12:30	1436.11		7.0331	0
2022-05-20 16:12:35	1789.11		7.0331	0
2022-05-20 16:12:40	1862.83		7.0331	0
2022-05-20 16:12:45	2065.68		7.0331	0
2022-05-20 16:12:50	2191.74		7.0331	0
2022-05-20 16:12:55	2381.43		7.0331	0
2022-05-20 16:13:00	2499.79		7.0331	0
2022-05-20 16:13:05	2354.85		7.0331	0
2022-05-20 16:13:10	2287.59		7.0331	0
2022-05-20 16:13:15	2171.67		7.0331	0
2022-05-20 16:13:20	2291.07		7.0331	0
2022-05-20 16:13:25	2289.25		7.0331	0
2022-05-20 16:13:30	2285.15		7.0331	0
2022-05-20 16:13:35	2315.91		7.0331	0
2022-05-20 16:13:40	2289.77		7.0331	0
2022-05-20 16:13:45	2273.64		7.0331	0
2022-05-20 16:13:50	2249.74		7.0331	0
2022-05-20 16:13:55	2022.45		7.0331	0
2022-05-20 16:14:05	1928.75		7.0331	0
2022-05-20 16:14:10	1911.79		7.0331	0
2022-05-20 16:14:15	1972.77		7.0331	0
2022-05-20 16:14:20	2045.78		7.0331	0
2022-05-20 16:14:25	2100.52		7.0331	0
2022-05-20 16:14:30	2050.82		7.0331	0
2022-05-20 16:14:35	1884.52		7.0331	0
2022-05-20 16:14:40	1813.65		7.0331	0
2022-05-20 16:14:45	1809.67		7.0331	0
2022-05-20 16:14:50	1794.76		7.0331	0
2022-05-20 16:14:55	1859.3		7.0331	0
2022-05-20 16:15:00	1908.17		7.0331	0
2022-05-20 16:15:05	2082.22		7.0331	0
2022-05-20 16:15:10	2216.79		7.0331	0
2022-05-20 16:15:15	2248.89		7.0331	0
2022-05-20 16:15:20	2293.25		7.0331	0
2022-05-20 16:15:25	2206.71		7.0331	0
2022-05-20 16:15:30	2028.35		7.0331	0
2022-05-20 16:15:35	2103.32		7.0331	0
2022-05-20 16:15:40	2178.55		7.0331	0
2022-05-20 16:15:45	2257.78		7.0331	0
2022-05-20 16:15:50	2732.18		7.0331	0
2022-05-20 16:15:55	2674.96		7.0331	0
2022-05-20 16:16:00	2627.31		7.0331	0
2022-05-20 16:16:05	2686.23		7.0331	0
2022-05-20 16:16:10	2807.28		7.0331	0
2022-05-20 16:16:15	2783.93		7.0331	0
2022-05-20 16:16:20	2875.02		7.0331	0
2022-05-20 16:16:25	3055.68		7.0331	0
2022-05-20 16:16:30	2853.1		7.0331	0
2022-05-20 16:16:35	2617.16		7.0331	0
2022-05-20 16:16:40	2560.52		7.0331	0
2022-05-20 16:16:45	2387.62		7.0331	0
2022-05-20 16:16:50	2343.92		7.0331	0
2022-05-20 16:16:55	2297.25		7.0331	0
2022-05-20 16:17:00	2322.35		7.0331	0
2022-05-20 16:17:05	2486.28		7.0331	0
2022-05-20 16:17:10	2608.12		7.0331	0
2022-05-20 16:17:15	2509.94		7.0331	0
2022-05-20 16:17:20	2479.04		7.0331	0
2022-05-20 16:17:25	2290.39		7.0331	0
2022-05-20 16:17:30	2196.16		7.0331	0
2022-05-20 16:17:35	2112.05		7.0331	0
2022-05-20 16:17:40	2067.77		7.0331	0
2022-05-20 16:17:45	1935.1		7.0331	0
2022-05-20 16:17:50	1694.26		7.0331	0
2022-05-20 16:17:55	1546.28		7.0331	0
2022-05-20 16:18:00	1500.68		7.0331	0
2022-05-20 16:18:05	1581.67		7.0331	0
2022-05-20 16:18:10	1637.26		7.0331	0
2022-05-20 16:18:15	1763.82		7.0331	0
2022-05-20 16:18:20	1927.48		7.0331	0
2022-05-20 16:18:25	2267.01		7.0331	0
2022-05-20 16:18:30	2331.37		7.0331	0
2022-05-20 16:18:35	2389.93		7.0331	0
2022-05-20 16:18:40	2381.44		7.0331	0
2022-05-20 16:18:45	2360.84		7.0331	0
2022-05-20 16:18:50	2418.02		7.0331	0
2022-05-20 16:18:55	2406.71		7.0331	0
2022-05-20 16:19:00	2455.69		7.0331	0
2022-05-20 16:19:05	2417.06		7.0331	0
2022-05-20 16:19:10	2580.71		7.0331	0
2022-05-20 16:19:15	2558.63		7.0331	0
2022-05-20 16:19:20	2252.85		7.0331	0
2022-05-20 16:19:25	2155.26		7.0331	0
2022-05-20 16:19:30	2090.73		7.0331	0
2022-05-20 16:19:35	2206.54		7.0331	0
2022-05-20 16:19:40	2416.04		7.0331	0
2022-05-20 16:19:45	2491.76		7.0331	0
2022-05-20 16:19:50	2295.12		7.0331	0
2022-05-20 16:19:55	2290.27		7.0331	0
2022-05-20 16:20:00	2476.26		7.0331	0
2022-05-20 16:20:05	2176.26		7.0331	0
2022-05-20 16:20:10	1914.28		7.0331	0
2022-05-20 16:20:15	1632.02		7.0331	0
2022-05-20 16:20:20	1408.95		7.0331	0
2022-05-20 16:20:25	1544.71		7.0331	0
2022-05-20 16:20:30	1787.09		7.0331	0
2022-05-20 16:20:35	1746.94		7.0331	0
2022-05-20 16:20:40	1899.42		7.0331	0
2022-05-20 16:20:45	2167.92		7.0331	0
2022-05-20 16:20:50	2411.69		7.0331	0
2022-05-20 16:20:55	2378.27		7.0331	0
2022-05-20 16:21:00	2745.9		7.0331	0
2022-05-20 16:21:05	2783.9		7.0331	0
2022-05-20 16:21:10	2714.19		7.0331	0
2022-05-20 16:21:15	2729.72		7.0331	0
2022-05-20 16:21:20	2860.37		7.0331	0
2022-05-20 16:21:25	2894.73		7.0331	0
2022-05-20 16:21:30	2847.85		7.0331	0
2022-05-20 16:21:35	2980.14		7.0331	0
2022-05-20 16:21:40	2860.74		7.0331	0
2022-05-20 16:21:45	2823.51		7.0331	0
2022-05-20 16:21:50	2717.14		7.0331	0
2022-05-20 16:21:55	2570.71		7.0331	0
2022-05-20 16:22:00	2649.45		7.0331	0
2022-05-20 16:22:05	2537.12		7.0331	0
2022-05-20 16:22:10	2469.39		7.0331	0
2022-05-20 16:22:15	2636.51		7.0331	0
2022-05-20 16:22:20	2432.43		7.0331	0
2022-05-20 16:22:25	2232.13		7.0331	0
2022-05-20 16:22:30	2200.42		7.0331	0
2022-05-20 16:22:35	2263.93		7.0331	0
2022-05-20 16:22:40	2279.16		7.0331	0
2022-05-20 16:22:45	2451.67		7.0331	0
2022-05-20 16:22:50	2541.08		7.0331	0
2022-05-20 16:22:55	2740.32		7.0331	0
2022-05-20 16:23:00	2757.02		7.0331	0
2022-05-20 16:23:05	2874.31		7.0331	0
2022-05-20 16:23:10	3010.14		7.0331	0
2022-05-20 16:23:15	2946.13		7.0331	0
2022-05-20 16:23:20	2793.66		7.0331	0
2022-05-20 16:23:25	2586.61		7.0331	0
2022-05-20 16:23:30	2422.65		7.0331	0
2022-05-20 16:23:35	2539.49		7.0331	0
2022-05-20 16:23:40	2520.92		7.0331	0
2022-05-20 16:23:45	2602.73		7.0331	0
2022-05-20 16:23:50	2381.42		7.0331	0
2022-05-20 16:23:55	2352.43		7.0331	0
2022-05-20 16:24:00	2458.01		7.0331	0
2022-05-20 16:24:05	2369.35		7.0331	0
2022-05-20 16:24:10	2164.99		7.0331	0
2022-05-20 16:24:15	2203.42		7.0331	0
2022-05-20 16:24:20	2202.53		7.0331	0
2022-05-20 16:24:25	2239.1		7.0331	0
2022-05-20 16:24:30	2211.29		7.0331	0
2022-05-20 16:24:35	2161.19		7.0331	0
2022-05-20 16:24:40	2260.46		7.0331	0
2022-05-20 16:24:45	2283.54		7.0331	0
2022-05-20 16:24:50	2649.77		7.0331	0
2022-05-20 16:24:55	3044.96		7.0331	0
2022-05-20 16:25:00	3167.29		7.0331	0
2022-05-20 16:25:05	3370.07		7.0331	0
2022-05-20 16:25:10	3544.63		7.0331	0
2022-05-20 16:25:15	3615.33		7.0331	0
2022-05-20 16:25:20	3870.66		7.0331	0
2022-05-20 16:25:25	3863.78		7.0331	0
2022-05-20 16:25:30	3645.96		7.0331	0
2022-05-20 16:25:35	3554.36		7.0331	0
2022-05-20 16:25:40	3575.77		7.0331	0
2022-05-20 16:25:45	3885.77		7.0331	0
2022-05-20 16:25:50	3825.67		7.0331	0
2022-05-20 16:25:55	3636.05		7.0331	0
2022-05-20 16:26:00	3382.65		7.0331	0
2022-05-20 16:26:05	3106.52		7.0331	0
2022-05-20 16:26:10	2729.32		7.0331	0
2022-05-20 16:26:15	2383.1		7.0331	0
2022-05-20 16:26:20	2207.72		7.0331	0
2022-05-20 16:26:25	2557.35		7.0331	0
2022-05-20 16:26:30	2788.82		7.0331	0
2022-05-20 16:26:35	2861.13		7.0331	0
2022-05-20 16:26:40	2878.14		7.0331	0
2022-05-20 16:26:45	2817.34		7.0331	0
2022-05-20 16:26:50	2721.01		7.0331	0
2022-05-20 16:26:55	2757.53		7.0331	0
2022-05-20 16:27:00	2790.35		7.0331	0
2022-05-20 16:27:05	2828.15		7.0331	0
2022-05-20 16:27:10	2686.26		7.0331	0
2022-05-20 16:27:15	2568.1		7.0331	0
2022-05-20 16:27:20	2543.46		7.0331	0
2022-05-20 16:27:25	2623.79		7.0331	0
2022-05-20 16:27:30	2580.67		7.0331	0
2022-05-20 16:27:35	2512.11		7.0331	0
2022-05-20 16:27:40	2285.55		7.0331	0
2022-05-20 16:27:45	1993.43		7.0331	0
2022-05-20 16:27:50	1916.63		7.0331	0
2022-05-20 16:27:55	2093.18		7.0331	0
2022-05-20 16:28:00	2305.71		7.0331	0
2022-05-20 16:28:05	2395.79		7.0331	0
2022-05-20 16:28:10	2635.95		7.0331	0
2022-05-20 16:28:15	2780.22		7.0331	0
2022-05-20 16:28:20	2750.16		7.0331	0
2022-05-20 16:28:25	2650.83		7.0331	0
2022-05-20 16:28:30	2760.74		7.0331	0
2022-05-20 16:28:35	2934.99		7.0331	0
2022-05-20 16:28:40	3128.62		7.0331	0
2022-05-20 16:28:45	3130.87		7.0331	0
2022-05-20 16:28:50	3204.82		7.0331	0
2022-05-20 16:28:55	3274.24		7.0331	0
2022-05-20 16:29:00	3293.47		7.0331	0
2022-05-20 16:29:05	3004.66		7.0331	0
2022-05-20 16:29:10	2797.3		7.0331	0
2022-05-20 16:29:15	2798.54		7.0331	0
2022-05-20 16:29:20	2525.09		7.0331	0
2022-05-20 16:29:25	2423.4		7.0331	0
2022-05-20 16:29:30	2148.51		7.0331	0
2022-05-20 16:29:35	2091.56		7.0331	0
2022-05-20 16:29:40	2017.21		7.0331	0
2022-05-20 16:29:45	2094.85		7.0331	0
2022-05-20 16:29:50	2171.28		7.0331	0
2022-05-20 16:29:55	2288.51		7.0331	0
2022-05-20 16:30:00	2380.22		7.0331	0
2022-05-20 16:30:05	2320.14		7.0331	0
2022-05-20 16:30:10	2581.57		7.0331	0
2022-05-20 16:30:15	2806.15		7.0331	0
2022-05-20 16:30:20	2960.89		7.0331	0
2022-05-20 16:30:25	2967.82		7.0331	0
2022-05-20 16:30:30	2963.16		7.0331	0
2022-05-20 16:30:35	2688.68		7.0331	0
2022-05-20 16:30:40	2510.69		7.0331	0
2022-05-20 16:30:45	2463.37		7.0331	0
2022-05-20 16:30:50	2431.61		7.0331	0
2022-05-20 16:30:55	2292.39		7.0331	0
2022-05-20 16:31:00	2172.69		7.0331	0
2022-05-20 16:31:05	1992.93		7.0331	0
2022-05-20 16:31:10	1835.91		7.0331	0
2022-05-20 16:31:15	1714.08		7.0331	0
2022-05-20 16:31:20	1784.34		7.0331	0
2022-05-20 16:31:25	1686.77		7.0331	0
2022-05-20 16:31:30	1754.84		7.0331	0
2022-05-20 16:31:35	2225.65		7.0331	0
2022-05-20 16:31:40	2641.43		7.0331	0
2022-05-20 16:31:45	2701.97		7.0331	0
2022-05-20 16:31:50	2803.16		7.0331	0
2022-05-20 16:31:55	3080.82		7.0331	0
2022-05-20 16:32:00	3036.11		7.0331	0
2022-05-20 16:32:05	3172.76		7.0331	0
2022-05-20 16:32:10	3311.36		7.0331	0
2022-05-20 16:32:15	3021.53		7.0331	0
2022-05-20 16:32:20	3031.06		7.0331	0
2022-05-20 16:32:25	2986.56		7.0331	0
2022-05-20 16:32:30	2951.99		7.0331	0
2022-05-20 16:32:35	2753.04		7.0331	0
2022-05-20 16:32:40	2661.75		7.0331	0
2022-05-20 16:32:45	2456.59		7.0331	0
2022-05-20 16:32:50	2648.49		7.0331	0
2022-05-20 16:32:55	2776.39		7.0331	0
2022-05-20 16:33:00	2872.04		7.0331	0
2022-05-20 16:33:05	3035.39		7.0331	0
2022-05-20 16:33:10	3473.49		7.0331	0
2022-05-20 16:33:15	3268.49		7.0331	0
2022-05-20 16:33:20	3213.99		7.0331	0
2022-05-20 16:33:25	3229.43		7.0331	0
2022-05-20 16:33:30	3081.55		7.0331	0
2022-05-20 16:33:35	3035.6		7.0331	0
2022-05-20 16:33:40	2791.42		7.0331	0
2022-05-20 16:33:45	3096.07		7.0331	0
2022-05-20 16:33:50	3183.73		7.0331	0
2022-05-20 16:33:55	3430.9		7.0331	0
2022-05-20 16:34:00	3578.26		7.0331	0
2022-05-20 16:34:05	4016.68		7.0331	0
2022-05-20 16:34:10	4093.6		7.0331	0
2022-05-20 16:34:15	4115.17		7.0331	0
2022-05-20 16:34:20	4110.72		7.0331	0
2022-05-20 16:34:25	4088.62		7.0331	0
2022-05-20 16:34:30	4066.46		7.0331	0
2022-05-20 16:34:35	3909.86		7.0331	0
2022-05-20 16:34:40	3763.1		7.0331	0
2022-05-20 16:34:45	3782.91		7.0331	0
2022-05-20 16:34:50	3802.21		7.0331	0
2022-05-20 16:35:05	3842.58		7.0331	0
2022-05-20 16:35:10	3990.81		7.0331	0
2022-05-20 16:35:15	4403.85		7.0331	0
2022-05-20 16:35:20	4519.78		7.0331	0
2022-05-20 16:35:25	4793.14		7.0331	0
2022-05-20 16:35:30	4935.44		7.0331	0
2022-05-20 16:35:35	4904.23		7.0331	0
2022-05-20 16:35:40	4849.84		7.0331	0
2022-05-20 16:35:45	4652.2		7.0331	0
2022-05-20 16:35:50	4635.96		7.0331	0
2022-05-20 16:35:55	4535.65		7.0331	0
2022-05-20 16:36:00	4666.83		7.0331	0
2022-05-20 16:36:05	4520.24		7.0331	0
2022-05-20 16:36:10	4277.95		7.0331	0
2022-05-20 16:36:15	4081.2		7.0331	0
2022-05-20 16:36:20	3626.02		7.0331	0
2022-05-20 16:36:25	3320.04		7.0331	0
2022-05-20 16:36:30	3146.73		7.0331	0
2022-05-20 16:36:35	2908.02		7.0331	0
2022-05-20 16:36:40	2866.44		7.0331	0
2022-05-20 16:36:45	3033.24		7.0331	0
2022-05-20 16:36:50	3508.68		7.0331	0
2022-05-20 16:36:55	3973		7.0331	0
2022-05-20 16:37:00	4378.24		7.0331	0
2022-05-20 16:37:05	4503.44		7.0331	0
2022-05-20 16:37:10	4504.54		7.0331	0
2022-05-20 16:37:15	4634.45		7.0331	0
2022-05-20 16:37:20	4609.73		7.0331	0
2022-05-20 16:37:25	4266.32		7.0331	0
2022-05-20 16:37:30	4065.77		7.0331	0
2022-05-20 16:37:35	3703.81		7.0331	0
2022-05-20 16:37:40	3439.36		7.0331	0
2022-05-20 16:37:45	3298.19		7.0331	0
2022-05-20 16:37:50	2867.59		7.0331	0
2022-05-20 16:37:55	2637.98		7.0331	0
2022-05-20 16:38:00	2618.38		7.0331	0
2022-05-20 16:38:05	2615.91		7.0331	0
2022-05-20 16:38:10	2686.41		7.0331	0
2022-05-20 16:38:15	2592.99		7.0331	0
2022-05-20 16:38:20	2441.96		7.0331	0
2022-05-20 16:38:25	3172.18		7.0331	0
2022-05-20 16:38:30	3834.5		7.0331	0
2022-05-20 16:38:35	4247.17		7.0331	0
2022-05-20 16:38:40	4467.11		7.0331	0
2022-05-20 16:38:45	4867.46		7.0331	0
2022-05-20 16:38:50	5199.22		7.0331	0
2022-05-20 16:38:55	5363.92		7.0331	0
2022-05-20 16:39:00	5517.38		7.0331	0
2022-05-20 16:39:05	5444.2		7.0331	0
2022-05-20 16:39:10	5498.01		7.0331	0
2022-05-20 16:39:15	5255.04		7.0331	0
2022-05-20 16:39:20	5153.05		7.0331	0
2022-05-20 16:39:25	5040.95		7.0331	0
2022-05-20 16:39:30	4892.91		7.0331	0
2022-05-20 16:39:35	4764.55		7.0331	0
2022-05-20 16:39:40	4262.05		7.0331	0
2022-05-20 16:39:45	4213.26		7.0331	0
2022-05-20 16:39:50	4103.85		7.0331	0
2022-05-20 16:39:55	3870.01		7.0331	0
2022-05-20 16:40:00	3854.31		7.0331	0
2022-05-20 16:40:05	3273.95		7.0331	0
2022-05-20 16:40:10	2544.34		7.0331	0
2022-05-20 16:40:15	2223.56		7.0331	0
2022-05-20 16:40:20	2238.42		7.0331	0
2022-05-20 16:40:25	2310.21		7.0331	0
2022-05-20 16:40:30	2781.77		7.0331	0
2022-05-20 16:40:35	2735.15		7.0331	0
2022-05-20 16:40:40	2739.67		7.0331	0
2022-05-20 16:40:45	2800.48		7.0331	0
2022-05-20 16:40:50	2806.32		7.0331	0
2022-05-20 16:40:55	2797.59		7.0331	0
2022-05-20 16:41:00	2751.22		7.0331	0
2022-05-20 16:41:05	3005.24		7.0331	0
2022-05-20 16:41:10	2976.66		7.0331	0
2022-05-20 16:41:15	2807.5		7.0331	0
2022-05-20 16:41:20	2667.18		7.0331	0
2022-05-20 16:41:25	2659.76		7.0331	0
2022-05-20 16:41:30	2725.9		7.0331	0
2022-05-20 16:41:35	2894.89		7.0331	0
2022-05-20 16:41:40	2875.48		7.0331	0
2022-05-20 16:41:45	2618.9		7.0331	0
2022-05-20 16:41:50	2707.98		7.0331	0
2022-05-20 16:41:55	2767.12		7.0331	0
2022-05-20 16:42:00	2721		7.0331	0
2022-05-20 16:42:05	2604.59		7.0331	0
2022-05-20 16:42:10	2593.36		7.0331	0
2022-05-20 16:42:15	2633.22		7.0331	0
2022-05-20 16:42:20	2621.83		7.0331	0
2022-05-20 16:42:25	2699.37		7.0331	0
2022-05-20 16:42:30	2696.69		7.0331	0
2022-05-20 16:42:35	2606.33		7.0331	0
2022-05-20 16:42:40	2587.99		7.0331	0
2022-05-20 16:42:45	2589.18		7.0331	0
2022-05-20 16:42:50	2887.87		7.0331	0
2022-05-20 16:42:55	2840.14		7.0331	0
2022-05-20 16:43:00	2636.52		7.0331	0
2022-05-20 16:43:05	2587.97		7.0331	0
2022-05-20 16:43:10	2566.94		7.0331	0
2022-05-20 16:43:15	2521.03		7.0331	0
2022-05-20 16:43:20	2645.4		7.0331	0
2022-05-20 16:43:25	2853.1		7.0331	0
2022-05-20 16:43:30	3064.69		7.0331	0
2022-05-20 16:43:35	3181.7		7.0331	0
2022-05-20 16:43:40	3248.84		7.0331	0
2022-05-20 16:43:45	3383.31		7.0331	0
2022-05-20 16:43:50	3161.74		7.0331	0
2022-05-20 16:43:55	3009.5		7.0331	0
2022-05-20 16:44:00	2932.92		7.0331	0
2022-05-20 16:44:05	2865.6		7.0331	0
2022-05-20 16:44:10	2864.62		7.0331	0
2022-05-20 16:44:15	2864.61		7.0331	0
2022-05-20 16:44:20	2775.67		7.0331	0
2022-05-20 16:44:25	2874.57		7.0331	0
2022-05-20 16:44:30	2873.97		7.0331	0
2022-05-20 16:44:35	2829.73		7.0331	0
2022-05-20 16:44:40	2957.84		7.0331	0
2022-05-20 16:44:45	2732.27		7.0331	0
2022-05-20 16:44:50	2605.71		7.0331	0
2022-05-20 16:44:55	2382.16		7.0331	0
2022-05-20 16:45:00	2219.49		7.0331	0
2022-05-20 16:45:05	2134.93		7.0331	0
2022-05-20 16:45:10	2091.6		7.0331	0
2022-05-20 16:45:15	1928.13		7.0331	0
2022-05-20 16:45:20	1906.58		7.0331	0
2022-05-20 16:45:25	2031.97		7.0331	0
2022-05-20 16:45:30	2248.89		7.0331	0
2022-05-20 16:45:35	2560.98		7.0331	0
2022-05-20 16:45:40	2629.01		7.0331	0
2022-05-20 16:45:45	2707.09		7.0331	0
2022-05-20 16:45:50	2612.72		7.0331	0
2022-05-20 16:45:55	2482.61		7.0331	0
2022-05-20 16:46:00	2592.15		7.0331	0
2022-05-20 16:46:05	2734.97		7.0331	0
2022-05-20 16:46:10	2638.85		7.0331	0
2022-05-20 16:46:15	2671.93		7.0331	0
2022-05-20 16:46:20	2587.37		7.0331	0
2022-05-20 16:46:25	2419.38		7.0331	0
2022-05-20 16:46:30	2438.09		7.0331	0
2022-05-20 16:46:35	2541.79		7.0331	0
2022-05-20 16:46:40	2552.47		7.0331	0
2022-05-20 16:46:45	2614.62		7.0331	0
2022-05-20 16:46:50	2708.94		7.0331	0
2022-05-20 16:46:55	2652.97		7.0331	0
2022-05-20 16:47:00	2327.95		7.0331	0
2022-05-20 16:47:05	2214.31		7.0331	0
2022-05-20 16:47:10	2174.96		7.0331	0
2022-05-20 16:47:15	2329.39		7.0331	0
2022-05-20 16:47:20	2408.23		7.0331	0
2022-05-20 16:47:25	2440.82		7.0331	0
2022-05-20 16:47:30	2434.13		7.0331	0
2022-05-20 16:47:35	2467.72		7.0331	0
2022-05-20 16:47:40	2591.39		7.0331	0
2022-05-20 16:47:45	2492.43		7.0331	0
2022-05-20 16:47:50	2203.51		7.0331	0
2022-05-20 16:47:55	2342.65		7.0331	0
2022-05-20 16:48:00	2437.57		7.0331	0
2022-05-20 16:48:05	2481.52		7.0331	0
2022-05-20 16:48:10	2640.97		7.0331	0
2022-05-20 16:48:15	2781.7		7.0331	0
2022-05-20 16:48:20	2986.6		7.0331	0
2022-05-20 16:48:25	3046.77		7.0331	0
2022-05-20 16:48:30	3052.05		7.0331	0
2022-05-20 16:48:35	3067.89		7.0331	0
2022-05-20 16:48:40	2862.74		7.0331	0
2022-05-20 16:48:45	3023.99		7.0331	0
2022-05-20 16:48:50	3151.74		7.0331	0
2022-05-20 16:48:55	3333.7		7.0331	0
2022-05-20 16:49:00	3176.6		7.0331	0
2022-05-20 16:49:05	3102.89		7.0331	0
2022-05-20 16:49:10	3226.3		7.0331	0
2022-05-20 16:49:15	3167.83		7.0331	0
2022-05-20 16:49:20	3306.13		7.0331	0
2022-05-20 16:49:25	3555.84		7.0331	0
2022-05-20 16:49:30	3622.93		7.0331	0
2022-05-20 16:49:35	3399.65		7.0331	0
2022-05-20 16:49:40	3248.24		7.0331	0
2022-05-20 16:49:45	3203.07		7.0331	0
2022-05-20 16:49:50	3394.51		7.0331	0
2022-05-20 16:49:55	3261.6		7.0331	0
2022-05-20 16:50:00	3035.17		7.0331	0
2022-05-20 16:50:05	2864.68		7.0331	0
2022-05-20 16:50:10	2804.86		7.0331	0
2022-05-20 16:50:15	2759.79		7.0331	0
2022-05-20 16:50:20	2713.76		7.0331	0
2022-05-20 16:50:25	2621.81		7.0331	0
2022-05-20 16:50:30	2577.66		7.0331	0
2022-05-20 16:50:35	2281.68		7.0331	0
2022-05-20 16:50:40	2015.72		7.0331	0
2022-05-20 16:50:45	1818.81		7.0331	0
2022-05-20 16:50:50	1658.96		7.0331	0
2022-05-20 16:50:55	1572.1		7.0331	0
2022-05-20 16:51:00	1650.86		7.0331	0
2022-05-20 16:51:05	1654.35		7.0331	0
2022-05-20 16:51:10	1665.85		7.0331	0
2022-05-20 16:51:15	1774.24		7.0331	0
2022-05-20 16:51:20	2174.84		7.0331	0
2022-05-20 16:51:25	2330.71		7.0331	0
2022-05-20 16:51:30	2221.07		7.0331	0
2022-05-20 16:51:35	2327.92		7.0331	0
2022-05-20 16:51:40	2581.93		7.0331	0
2022-05-20 16:51:45	2679.62		7.0331	0
2022-05-20 16:51:50	2809.74		7.0331	0
2022-05-20 16:51:55	3103.02		7.0331	0
2022-05-20 16:52:00	3121.45		7.0331	0
2022-05-20 16:52:05	2967.5		7.0331	0
2022-05-20 16:52:10	2661.76		7.0331	0
2022-05-20 16:52:15	2439.8		7.0331	0
2022-05-20 16:52:20	2411.91		7.0331	0
2022-05-20 16:52:25	2677.57		7.0331	0
2022-05-20 16:52:30	2923.71		7.0331	0
2022-05-20 16:52:35	2881.37		7.0331	0
2022-05-20 16:52:40	2815.9		7.0331	0
2022-05-20 16:52:45	2791.8		7.0331	0
2022-05-20 16:52:50	2838.07		7.0331	0
2022-05-20 16:52:55	2418.84		7.0331	0
2022-05-20 16:53:00	2072.16		7.0331	0
2022-05-20 16:53:05	2157.93		7.0331	0
2022-05-20 16:53:10	2240.06		7.0331	0
2022-05-20 16:53:15	1849.2		7.0331	0
2022-05-20 16:53:20	1622.13		7.0331	0
2022-05-20 16:53:25	1712.12		7.0331	0
2022-05-20 16:53:30	1759.47		7.0331	0
2022-05-20 16:53:35	1876.73		7.0331	0
2022-05-20 16:53:40	1957.5		7.0331	0
2022-05-20 16:53:45	2229.81		7.0331	0
2022-05-20 16:53:50	2335.81		7.0331	0
2022-05-20 16:53:55	2273.82		7.0331	0
2022-05-20 16:54:00	2314.94		7.0331	0
2022-05-20 16:54:05	2429.49		7.0331	0
2022-05-20 16:54:10	2365.02		7.0331	0
2022-05-20 16:54:15	2404.8		7.0331	0
2022-05-20 16:54:20	2515.6		7.0331	0
2022-05-20 16:54:25	2673.46		7.0331	0
2022-05-20 16:54:30	3182.08		7.0331	0
2022-05-20 16:54:35	3588.48		7.0331	0
2022-05-20 16:54:40	4067.17		7.0331	0
2022-05-20 16:54:45	4591.19		7.0331	0
2022-05-20 16:54:50	4997.21		7.0331	0
2022-05-20 16:54:55	5289.35		7.0331	0
2022-05-20 16:55:00	5586.36		7.0331	0
2022-05-20 16:55:05	5375.76		7.0331	0
2022-05-20 16:55:10	5384.85		7.0331	0
2022-05-20 16:55:15	5700.98		7.0331	0
2022-05-20 16:55:20	5964.86		7.0331	0
2022-05-20 16:55:25	5913.21		7.0331	0
2022-05-20 16:55:30	4734.41		7.0331	0
2022-05-20 16:55:35	4581.55		7.0331	0
2022-05-20 16:55:40	4265.12		7.0331	0
2022-05-20 16:55:45	3880.17		7.0331	0
2022-05-20 16:55:50	3804.26		7.0331	0
2022-05-20 16:55:55	3619.66		7.0331	0
2022-05-20 16:56:00	3355.3		7.0331	0
2022-05-20 16:56:05	2862.78		7.0331	0
2022-05-20 16:56:10	2849.69		7.0331	0
2022-05-20 16:56:15	2913.08		7.0331	0
2022-05-20 16:56:20	2944.37		7.0331	0
2022-05-20 16:56:25	3018.99		7.0331	0
2022-05-20 16:56:30	3091.4		7.0331	0
2022-05-20 16:56:35	3245.18		7.0331	0
2022-05-20 16:56:40	3583.59		7.0331	0
2022-05-20 16:56:45	3620.51		7.0331	0
2022-05-20 16:56:50	3408.91		7.0331	0
2022-05-20 16:56:55	3373.72		7.0331	0
2022-05-20 16:57:00	3390.54		7.0331	0
2022-05-20 16:57:05	3362.4		7.0331	0
2022-05-20 16:57:10	3580.45		7.0331	0
2022-05-20 16:57:15	3686.62		7.0331	0
2022-05-20 16:57:20	3498.69		7.0331	0
2022-05-20 16:57:25	3301.4		7.0331	0
2022-05-20 16:57:30	3297.99		7.0331	0
2022-05-20 16:57:35	3199.23		7.0331	0
2022-05-20 16:57:40	3013.58		7.0331	0
2022-05-20 16:57:45	3064.85		7.0331	0
2022-05-20 16:57:50	3245.53		7.0331	0
2022-05-20 16:57:55	3242.83		7.0331	0
2022-05-20 16:58:00	3263.07		7.0331	0
2022-05-20 16:58:05	3131.78		7.0331	0
2022-05-20 16:58:10	3175.99		7.0331	0
2022-05-20 16:58:15	3157.54		7.0331	0
2022-05-20 16:58:20	3011.64		7.0331	0
2022-05-20 16:58:25	2724.77		7.0331	0
2022-05-20 16:58:30	2536.58		7.0331	0
2022-05-20 16:58:35	2389.22		7.0331	0
2022-05-20 16:58:40	2362.27		7.0331	0
2022-05-20 16:58:45	2440.81		7.0331	0
2022-05-20 16:58:50	2552.79		7.0331	0
2022-05-20 16:58:55	2816.57		7.0331	0
2022-05-20 16:59:00	2680.45		7.0331	0
2022-05-20 16:59:05	2651.05		7.0331	0
2022-05-20 16:59:10	2761.96		7.0331	0
2022-05-20 16:59:15	2821.92		7.0331	0
2022-05-20 16:59:20	2803.57		7.0331	0
2022-05-20 16:59:25	2856.36		7.0331	0
2022-05-20 16:59:30	2726.93		7.0331	0
2022-05-20 16:59:35	2561.06		7.0331	0
2022-05-20 16:59:40	2331.43		7.0331	0
2022-05-20 16:59:45	2284.94		7.0331	0
2022-05-20 16:59:50	2279.04		7.0331	0
2022-05-20 16:59:55	2564.39		7.0331	0
2022-05-20 17:00:05	3366.3		7.0331	0
2022-05-20 17:00:10	3438.46		7.0331	0
2022-05-20 17:00:15	3643.75		7.0331	0
2022-05-20 17:00:20	3591.74		7.0331	0
2022-05-20 17:00:25	3480.23		7.0331	0
2022-05-20 17:00:30	3452.19		7.0331	0
2022-05-20 17:00:35	3540.99		7.0331	0
2022-05-20 17:00:40	3583.33		7.0331	0
2022-05-20 17:00:45	3338.03		7.0331	0
2022-05-20 17:00:50	2965.38		7.0331	0
2022-05-20 17:00:55	2659.25		7.0331	0
2022-05-20 17:01:00	2595.03		7.0331	0
2022-05-20 17:01:05	2653.04		7.0331	0
2022-05-20 17:01:10	2589.45		7.0331	0
2022-05-20 17:01:15	2596.5		7.0331	0
2022-05-20 17:01:20	2585.47		7.0331	0
2022-05-20 17:01:25	2549.94		7.0331	0
2022-05-20 17:01:30	2569.15		7.0331	0
2022-05-20 17:01:35	2823.01		7.0331	0
2022-05-20 17:01:40	3011.11		7.0331	0
2022-05-20 17:01:45	3215.79		7.0331	0
2022-05-20 17:01:50	3101.25		7.0331	0
2022-05-20 17:01:55	3211.25		7.0331	0
2022-05-20 17:02:00	3166.76		7.0331	0
2022-05-20 17:02:05	2951.67		7.0331	0
2022-05-20 17:02:10	2681.05		7.0331	0
2022-05-20 17:02:15	2531.17		7.0331	0
2022-05-20 17:02:20	2583.9		7.0331	0
2022-05-20 17:02:25	2750.19		7.0331	0
2022-05-20 17:02:30	3066.5		7.0331	0
2022-05-20 17:02:35	3215.94		7.0331	0
2022-05-20 17:02:40	2951.52		7.0331	0
2022-05-20 17:02:45	3161.9		7.0331	0
2022-05-20 17:02:50	3335.11		7.0331	0
2022-05-20 17:02:55	3282.16		7.0331	0
2022-05-20 17:03:00	3219.18		7.0331	0
2022-05-20 17:03:05	3079.08		7.0331	0
2022-05-20 17:03:10	2923.93		7.0331	0
2022-05-20 17:03:15	2678.73		7.0331	0
2022-05-20 17:03:20	2683.37		7.0331	0
2022-05-20 17:03:25	2647.7		7.0331	0
2022-05-20 17:03:30	2578		7.0331	0
2022-05-20 17:03:35	2487.29		7.0331	0
2022-05-20 17:03:40	2430.52		7.0331	0
2022-05-20 17:03:45	2307.82		7.0331	0
2022-05-20 17:03:50	2160.64		7.0331	0
2022-05-20 17:03:55	2247.31		7.0331	0
2022-05-20 17:04:00	2418.21		7.0331	0
2022-05-20 17:04:05	2421.7		7.0331	0
2022-05-20 17:04:10	2679.96		7.0331	0
2022-05-20 17:04:15	2658.99		7.0331	0
2022-05-20 17:04:20	2582.77		7.0331	0
2022-05-20 17:04:25	2449.3		7.0331	0
2022-05-20 17:04:30	2437.89		7.0331	0
2022-05-20 17:04:35	2409		7.0331	0
2022-05-20 17:04:40	2415.92		7.0331	0
2022-05-20 17:04:45	2418.91		7.0331	0
2022-05-20 17:04:50	2438.02		7.0331	0
2022-05-20 17:04:55	2302.92		7.0331	0

## Sheet: flow_histo LD corrected
Date/Time [UTC]	_phi [g/s]	_phi_err	_velo_eff	_velo_eff_err	_frac_optflow_ok	_frac_optflow_ok_ica
2022-05-20 16:05:15	3731.08		6.9232	0.325797
2022-05-20 16:05:20	2477.81		4.79173	0.278357
2022-05-20 16:05:25	3140.05		5.99509	0.420745
2022-05-20 16:05:30	3692.61		7.44387	0.377714
2022-05-20 16:05:35	2766.72		5.33394	0.272502
2022-05-20 16:05:40	3340.79		7.03539	0.453648
2022-05-20 16:05:45	3155.01		6.32025	0.457309
2022-05-20 16:05:50	3718.97		7.39787	0.446335
2022-05-20 16:05:55	2484.62		5.22039	0.160009
2022-05-20 16:06:00	3164.28		6.80765	0.375133
2022-05-20 16:06:05	3303.27		7.44418	0.136093
2022-05-20 16:06:10
2022-05-20 16:06:15
2022-05-20 16:06:20	2859.71		6.68217	0.107196
2022-05-20 16:06:25	1133.89		3.06089	0.0652677
2022-05-20 16:06:30
2022-05-20 16:06:35
2022-05-20 16:06:40
2022-05-20 16:06:45	1494.41		4.24026	0.416677
2022-05-20 16:06:50	2124.02		5.95988	0.531014
2022-05-20 16:06:55	2850.05		7.27961	0.348134
2022-05-20 16:07:00
2022-05-20 16:07:05	3369.59		8.27953	0.538799
2022-05-20 16:07:10	3665.7		8.09713	0.5029
2022-05-20 16:07:15	2300.14		4.90207	0.286254
2022-05-20 16:07:20
2022-05-20 16:07:25	-351.733		-0.668919	0.977409
2022-05-20 16:07:30	969.387		1.74816	3.02801
2022-05-20 16:07:35	1991.54		3.28612	1.29503
2022-05-20 16:07:40
2022-05-20 16:07:45	2300.74		3.83094	1.04461
2022-05-20 16:07:50
2022-05-20 16:07:55
2022-05-20 16:08:00
2022-05-20 16:08:05	1198.7		2.36447	0.252058
2022-05-20 16:08:10
2022-05-20 16:08:15
2022-05-20 16:08:20
2022-05-20 16:08:25	1735.64		4.64616	0.438083
2022-05-20 16:08:30	1455.2		4.06101	0.122052
2022-05-20 16:08:35	1941.45		4.85228	0.137894
2022-05-20 16:08:40	2330.33		5.59239	0.315601
2022-05-20 16:08:45	3253.28		7.32416	0.6127
2022-05-20 16:08:50	3188.19		6.922	0.648655
2022-05-20 16:08:55	780.775		1.66019	0.305988
2022-05-20 16:09:00	932.311		1.91993	0.385569
2022-05-20 16:09:05
2022-05-20 16:09:10	619.513		1.24146	0.326532
2022-05-20 16:09:15	1441.29		3.10918	0.418236
2022-05-20 16:09:20	1885.16		4.44608	0.280518
2022-05-20 16:09:25	1165.62		2.86949	0.138688
2022-05-20 16:09:30	1753.96		4.59891	0.18773
2022-05-20 16:09:35	2833.38		7.76233	0.492779
2022-05-20 16:09:40	1770.62		4.26961	0.150041
2022-05-20 16:09:45	2805.33		6.84537	0.253162
2022-05-20 16:09:50	1643.17		3.79261	1.39086
2022-05-20 16:09:55
2022-05-20 16:10:00
2022-05-20 16:10:05	2392.16		5.49662	0.517347
2022-05-20 16:10:10
2022-05-20 16:10:15	2135.68		4.15056	0.341405
2022-05-20 16:10:20	2211.79		3.98881	0.249094
2022-05-20 16:10:25	2236.49		4.27469	0.448568
2022-05-20 16:10:30	1710.16		3.99027	0.0841912
2022-05-20 16:10:35	2174.25		5.33542	1.10286
2022-05-20 16:10:40	2136.65		5.22551	0.860703
2022-05-20 16:10:45
2022-05-20 16:10:50	2730.65		6.66915	0.440482
2022-05-20 16:10:55	4219.07		8.13023	0.395397
2022-05-20 16:11:00	4796.47		8.715	0.438974
2022-05-20 16:11:05	3347.78		6.11587	0.524261
2022-05-20 16:11:10	3113.74		5.7535	0.290328
2022-05-20 16:11:15
2022-05-20 16:11:20	1875.34		3.72934	0.239378
2022-05-20 16:11:25	2508.65		5.14903	0.366201
2022-05-20 16:11:30	3264.37		6.80532	0.430736
2022-05-20 16:11:35	2728.29		5.59266	0.239724
2022-05-20 16:11:40	3080.81		6.21785	0.20942
2022-05-20 16:11:45	2324.68		4.79237	0.407323
2022-05-20 16:11:50	1601.4		3.93765	0.235159
2022-05-20 16:11:55	1456.66		3.78591	0.445597
2022-05-20 16:12:00	1486.55		3.70302	0.183333
2022-05-20 16:12:05	1463.34		4.28709	0.23213
2022-05-20 16:12:10	997.051		3.55143	0.0838356
2022-05-20 16:12:15
2022-05-20 16:12:20	1108.71		4.62566	0.500466
2022-05-20 16:12:25	1018.85		4.69487	0.108032
2022-05-20 16:12:30	1441.34		5.86297	0.299667
2022-05-20 16:12:35	2551.26		7.78498	0.330886
2022-05-20 16:12:40	1731.5		5.09332	0.22113
2022-05-20 16:12:45	2908.04		7.48374	0.244013
2022-05-20 16:12:50	3440.32		8.11467	0.134391
2022-05-20 16:12:55	3271.93		6.97892	0.410711
2022-05-20 16:13:00	3568.37		7.28278	0.308643
2022-05-20 16:13:05	3902.09		8.61695	0.367119
2022-05-20 16:13:10	2268		5.28718	0.445556
2022-05-20 16:13:15	2060.62		5.18612	0.322875
2022-05-20 16:13:20	2398.62		5.72248	0.725104
2022-05-20 16:13:25	1376.82		3.22502	0.461537
2022-05-20 16:13:30
2022-05-20 16:13:35
2022-05-20 16:13:40	1640.65		3.93077	0.25318
2022-05-20 16:13:45	1838.58		4.48593	0.398637
2022-05-20 16:13:50	2607.97		6.57359	0.238842
2022-05-20 16:13:55
2022-05-20 16:14:05	1164.62		3.59063	0.171169
2022-05-20 16:14:10	1402.54		4.34273	0.101547
2022-05-20 16:14:15	1011.25		3.01771	0.387706
2022-05-20 16:14:20	1024.27		2.92798	0.132449
2022-05-20 16:14:25	1234.09		3.37188	0.0715952
2022-05-20 16:14:30	1835.67		5.25172	0.175554
2022-05-20 16:14:35	1480.49		4.64486	0.0821575
2022-05-20 16:14:40	989.794		3.22809	0.174329
2022-05-20 16:14:45
2022-05-20 16:14:50	1072.12		3.62726	0.561541
2022-05-20 16:14:55	1693.88		5.53091	0.261797
2022-05-20 16:15:00	1579.66		4.9217	0.102386
2022-05-20 16:15:05	2453.24		6.79624	0.309577
2022-05-20 16:15:10	2766.38		6.91	0.361566
2022-05-20 16:15:15	2665.06		6.54381	0.314925
2022-05-20 16:15:20	2498.78		6.1174	0.411083
2022-05-20 16:15:25	1993.33		5.07407	0.26596
2022-05-20 16:15:30	2241.67		6.34172	0.180442
2022-05-20 16:15:35	2623.26		7.09234	0.469791
2022-05-20 16:15:40	2286.68		5.91512	0.308543
2022-05-20 16:15:45	2687.83		6.65314	0.229721
2022-05-20 16:15:50	3959.58		7.86068	0.300682
2022-05-20 16:15:55	3524.8		7.17598	0.274948
2022-05-20 16:16:00	1804.69		3.75362	1.16715
2022-05-20 16:16:05
2022-05-20 16:16:10	3113.62		6.02479	0.574237
2022-05-20 16:16:15	2577.69		5.10511	1.04101
2022-05-20 16:16:20	3893.83		7.42216	0.309682
2022-05-20 16:16:25	4794.6		8.44639	0.32886
2022-05-20 16:16:30	4093.11		7.83192	0.524639
2022-05-20 16:16:35	2991.79		6.36234	0.612158
2022-05-20 16:16:40	3259.7		7.10139	0.562168
2022-05-20 16:16:45	2497.4		5.90576	0.430628
2022-05-20 16:16:50	1960.71		4.72987	0.453385
2022-05-20 16:16:55
2022-05-20 16:17:00
2022-05-20 16:17:05	1840.06		4.03104	0.500828
2022-05-20 16:17:10	2543.09		5.18341	0.44284
2022-05-20 16:17:15	2111.95		4.51886	0.37618
2022-05-20 16:17:20	2292.6		4.94652	0.274349
2022-05-20 16:17:25	1876.93		4.47362	0.258336
2022-05-20 16:17:30	1777.38		4.46482	0.243603
2022-05-20 16:17:35	1643.23		4.38816	0.154716
2022-05-20 16:17:40	1675.53		4.52638	0.382978
2022-05-20 16:17:45	1357.77		3.92807	0.378778
2022-05-20 16:17:50	2013.55		6.68149	0.557442
2022-05-20 16:17:55	2290.62		8.41849	0.308333
2022-05-20 16:18:00	1788.54		6.76816	0.290814
2022-05-20 16:18:05	1535.68		5.51754	0.25475
2022-05-20 16:18:10	1484.27		5.19712	0.299441
2022-05-20 16:18:15	1550.22		4.96304	1.07182
2022-05-20 16:18:20	1769.48		5.05083	0.393026
2022-05-20 16:18:25	2842.75		6.71317	0.350265
2022-05-20 16:18:30	2621.02		6.03009	0.482637
2022-05-20 16:18:35	2725.28		6.06324	0.552716
2022-05-20 16:18:40
2022-05-20 16:18:45	3309.82		7.39741	0.459728
2022-05-20 16:18:50	2601.59		5.67516	0.280011
2022-05-20 16:18:55	1551.96		3.4323	0.494915
2022-05-20 16:19:00	1945.25		4.21341	0.479431
2022-05-20 16:19:05	1962.54		4.33725	0.675737
2022-05-20 16:19:10	1696		3.46207	0.371659
2022-05-20 16:19:15	2728.9		5.59448	0.480448
2022-05-20 16:19:20
2022-05-20 16:19:25	1340.5		3.37526	0.494792
2022-05-20 16:19:30	1520.86		3.9759	0.673651
2022-05-20 16:19:35	1200.45		2.87188	0.705091
2022-05-20 16:19:40	1554.14		3.34679	0.227675
2022-05-20 16:19:45	1670.74		3.46012	0.490475
2022-05-20 16:19:50	2563.15		5.8542	0.487076
2022-05-20 16:19:55	2285.83		5.2031	0.371881
2022-05-20 16:20:00	2809		5.73828	0.178331
2022-05-20 16:20:05	1341.92		3.12024	0.321827
2022-05-20 16:20:10	1811.29		4.89473	0.117193
2022-05-20 16:20:15	1710.36		5.58465	0.209493
2022-05-20 16:20:20
2022-05-20 16:20:25	1462.23		5.16112	0.549266
2022-05-20 16:20:30	2085.16		6.25903	0.517323
2022-05-20 16:20:35	1807.13		5.69527	0.346467
2022-05-20 16:20:40	2796.15		7.72537	0.310394
2022-05-20 16:20:45	3656.23		8.89245	0.28086
2022-05-20 16:20:50	3415.36		7.46543	0.29286
2022-05-20 16:20:55	3637.66		8.05904	0.317204
2022-05-20 16:21:00	3767.54		7.1362	0.360943
2022-05-20 16:21:05	3441.02		6.52765	0.462896
2022-05-20 16:21:10	3006.23		5.93798	0.421507
2022-05-20 16:21:15	2200.36		4.29322	0.748905
2022-05-20 16:21:20
2022-05-20 16:21:25	3358.39		6.12011	1.46016
2022-05-20 16:21:30	1933.86		3.59876	0.926989
2022-05-20 16:21:35	2854.94		4.96516	0.725122
2022-05-20 16:21:40
2022-05-20 16:21:45
2022-05-20 16:21:50
2022-05-20 16:21:55	2989.29		5.75287	0.394156
2022-05-20 16:22:00	2369.6		4.32308	0.206906
2022-05-20 16:22:05	2001.49		3.79187	0.0976428
2022-05-20 16:22:10	2302.84		4.49805	0.184681
2022-05-20 16:22:15
2022-05-20 16:22:20	2149.47		4.25865	0.19005
2022-05-20 16:22:25	1622.67		3.5559	0.178333
2022-05-20 16:22:30	1922.23		4.33449	0.0887392
2022-05-20 16:22:35
2022-05-20 16:22:40	2214.29		4.90036	0.445169
2022-05-20 16:22:45	2232.55		4.59332	0.495417
2022-05-20 16:22:50	1829.15		3.63108	0.261587
2022-05-20 16:22:55	2359.27		4.30836	0.317763
2022-05-20 16:23:00	2555.19		4.6547	0.536995
2022-05-20 16:23:05
2022-05-20 16:23:10
2022-05-20 16:23:15	2250.49		3.8742	0.63206
2022-05-20 16:23:20
2022-05-20 16:23:25
2022-05-20 16:23:30
2022-05-20 16:23:35	1653.37		3.43627	1.05903
2022-05-20 16:23:40	1929.91		4.05189	0.62505
2022-05-20 16:23:45	2253.63		4.51866	0.276579
2022-05-20 16:23:50	2126.52		4.67437	0.416577
2022-05-20 16:23:55	1995.13		4.43874	1.82838
2022-05-20 16:24:00	2151.12		4.55398	1.50399
2022-05-20 16:24:05	2436.67		5.40801	0.346483
2022-05-20 16:24:10	1728.94		4.26712	0.858509
2022-05-20 16:24:15	1254.36		3.04457	0.629401
2022-05-20 16:24:20	2124.05		5.1994	0.557932
2022-05-20 16:24:25	1879.69		4.51119	0.256275
2022-05-20 16:24:30	1917.19		4.6806	0.117728
2022-05-20 16:24:35	2052.67		5.23423	0.286743
2022-05-20 16:24:40	2959.56		7.30983	0.163754
2022-05-20 16:24:45
2022-05-20 16:24:50	3047.91		6.1471	0.459359
2022-05-20 16:24:55	3759.06		6.47672	0.24957
2022-05-20 16:25:00	3254.72		5.34056	0.251569
2022-05-20 16:25:05	4314.39		6.56896	0.315961
2022-05-20 16:25:10
2022-05-20 16:25:15	4291.22		6.00369	0.339724
2022-05-20 16:25:20	5107.77		6.62071	0.236895
2022-05-20 16:25:25	4007.48		5.16298	0.22946
2022-05-20 16:25:30	5278.32		7.19337	0.26343
2022-05-20 16:25:35
2022-05-20 16:25:40	3950.48		5.46557	0.65869
2022-05-20 16:25:45	4412.14		5.56302	0.681902
2022-05-20 16:25:50	4845.07		6.23522	0.676206
2022-05-20 16:25:55
2022-05-20 16:26:00	3792.35		5.47317	0.190784
2022-05-20 16:26:05	2978.67		4.68586	0.217384
2022-05-20 16:26:10	3528.16		6.33803	0.120776
2022-05-20 16:26:15	2994.23		6.35313	0.276671
2022-05-20 16:26:20	2257.84		5.2302	0.400856
2022-05-20 16:26:25	3198.3		6.23646	0.361224
2022-05-20 16:26:30	3397.28		6.14033	0.276587
2022-05-20 16:26:35
2022-05-20 16:26:40	3769.23		6.53579	0.995464
2022-05-20 16:26:45
2022-05-20 16:26:50	2191.68		4.12859	0.731964
2022-05-20 16:26:55
2022-05-20 16:27:00	2356.06		4.3716	0.322505
2022-05-20 16:27:05	2359.66		4.28505	0.324897
2022-05-20 16:27:10	1895.58		3.65329	0.469243
2022-05-20 16:27:15	2168.1		4.40412	0.278674
2022-05-20 16:27:20	3071.46		6.34794	0.328
2022-05-20 16:27:25	2380.93		4.79281	0.325129
2022-05-20 16:27:30	2601.01		5.26761	0.319931
2022-05-20 16:27:35	2514.34		5.23278	0.37331
2022-05-20 16:27:40	2263.23		5.2391	0.486301
2022-05-20 16:27:45
2022-05-20 16:27:50	1642.85		4.76746	0.361107
2022-05-20 16:27:55
2022-05-20 16:28:00
2022-05-20 16:28:05	2239.08		5.01416	0.790716
2022-05-20 16:28:10
2022-05-20 16:28:15	3115.2		5.94004	0.563089
2022-05-20 16:28:20	2367.49		4.62636	1.10374
2022-05-20 16:28:25	2501.67		5.1111	0.426376
2022-05-20 16:28:30	2866.58		5.67088	0.461032
2022-05-20 16:28:35	1193.14		2.19787	0.886359
2022-05-20 16:28:40	3285.1		5.662	0.422883
2022-05-20 16:28:45	2118.33		3.64083	0.360727
2022-05-20 16:28:50	2352.35		3.91983	0.224455
2022-05-20 16:28:55	2817.8		4.57254	0.534242
2022-05-20 16:29:00	3722.96		5.9451	0.701771
2022-05-20 16:29:05	2114.76		3.75006	0.555087
2022-05-20 16:29:10	1574.72		2.9643	0.594377
2022-05-20 16:29:15	3986.35		7.4884	0.659634
2022-05-20 16:29:20	3162.38		6.57557	0.336994
2022-05-20 16:29:25	3054.15		6.71548	0.312469
2022-05-20 16:29:30	2537.88		6.48366	0.33454
2022-05-20 16:29:35	1927.25		5.11803	0.214865
2022-05-20 16:29:40	1837.96		5.09685	0.935492
2022-05-20 16:29:45
2022-05-20 16:29:50	1720.28		4.24766	0.245119
2022-05-20 16:29:55	2796.26		6.48299	0.725964
2022-05-20 16:30:00	3014.11		6.5756	0.202541
2022-05-20 16:30:05	3075.94		6.96282	0.723383
2022-05-20 16:30:10	2826.23		5.70212	0.426077
2022-05-20 16:30:15	4314.69		7.87311	0.39924
2022-05-20 16:30:20	3685.91		6.39155	0.340365
2022-05-20 16:30:25	3744.26		6.47312	0.480024
2022-05-20 16:30:30	3299		5.73301	0.656109
2022-05-20 16:30:35	4115.79		7.95711	0.73366
2022-05-20 16:30:40	2260.41		4.69702	1.41213
2022-05-20 16:30:45
2022-05-20 16:30:50
2022-05-20 16:30:55	1863.96		4.2356	0.428422
2022-05-20 16:31:00	1863.69		4.48975	0.267364
2022-05-20 16:31:05	1850.74		4.83452	0.0769402
2022-05-20 16:31:10	1680.09		4.81618	0.0702614
2022-05-20 16:31:15	1677.04		5.10754	0.361197
2022-05-20 16:31:20	2250.38		6.50203	0.217435
2022-05-20 16:31:25	2148.74		6.60509	0.414765
2022-05-20 16:31:30	2406.87		7.35143	0.156249
2022-05-20 16:31:35	2688.61		6.20278	0.160485
2022-05-20 16:31:40	2918.63		5.62171	0.487462
2022-05-20 16:31:45	4121.14		7.67566	0.469714
2022-05-20 16:31:50	4175.85		7.43793	0.665704
2022-05-20 16:31:55	3858.2		6.17536	0.762288
2022-05-20 16:32:00	4855.97		7.88038	0.395966
2022-05-20 16:32:05	4787.09		7.37273	0.481347
2022-05-20 16:32:10	5202.09		7.66245	0.752052
2022-05-20 16:32:15	3505.94		5.67233	0.404084
2022-05-20 16:32:20	4763.53		7.67017	0.373338
2022-05-20 16:32:25	3920.62		6.38387	0.304299
2022-05-20 16:32:30	3676.39		6.06488	0.389624
2022-05-20 16:32:35	3349.73		5.96983	0.176094
2022-05-20 16:32:40	2973.98		5.53082	0.357691
2022-05-20 16:32:45
2022-05-20 16:32:50	2189.62		4.06497	0.191876
2022-05-20 16:32:55	2218.85		3.88819	0.2885
2022-05-20 16:33:00	3079.13		5.15817	0.351591
2022-05-20 16:33:05	4096.06		6.43767	0.343333
2022-05-20 16:33:10	5227.03		7.15679	0.346631
2022-05-20 16:33:15	4090.05		5.99385	0.281368
2022-05-20 16:33:20	3600.57		5.40696	0.075579
2022-05-20 16:33:25	4657.69		6.9775	0.322191
2022-05-20 16:33:30	3759.51		5.94332	0.401843
2022-05-20 16:33:35	3900.59		6.27662	0.27465
2022-05-20 16:33:40	2757.75		4.89373	0.143849
2022-05-20 16:33:45	4232.06		6.66226	0.168842
2022-05-20 16:33:50	3191.42		4.90224	0.35399
2022-05-20 16:33:55	4696.28		6.68991	0.301691
2022-05-20 16:34:00	4416.93		6.01422	0.354896
2022-05-20 16:34:05	3700.65		4.46642	0.414785
2022-05-20 16:34:10	4407.09		5.19415	0.690275
2022-05-20 16:34:15	5942.98		6.94526	0.129329
2022-05-20 16:34:20	4917.81		5.73578	0.38666
2022-05-20 16:34:25	4132.52		4.83607	0.334462
2022-05-20 16:34:30	4335.48		5.10407	0.429568
2022-05-20 16:34:35	3882.12		4.79486	0.333754
2022-05-20 16:34:40	3896.46		4.98656	0.547524
2022-05-20 16:34:45
2022-05-20 16:34:50	2325.05		2.94616	0.882969
2022-05-20 16:35:05	4623.19		5.77614	0.924297
2022-05-20 16:35:10	4995.23		5.97162	0.459294
2022-05-20 16:35:15	5685.17		6.06819	0.375771
2022-05-20 16:35:20
2022-05-20 16:35:25	4242.8		4.11732	0.627028
2022-05-20 16:35:30	5818.35		5.47061	0.563636
2022-05-20 16:35:35	4340.87		4.11398	1.00679
2022-05-20 16:35:40
2022-05-20 16:35:45	3692.76		3.75601	0.726381
2022-05-20 16:35:50	5548.3		5.65868	0.339332
2022-05-20 16:35:55	3987.22		4.15217	0.643712
2022-05-20 16:36:00	4123.89		4.1756	0.499811
2022-05-20 16:36:05
2022-05-20 16:36:10	3235.68		3.6596	0.975127
2022-05-20 16:36:15
2022-05-20 16:36:20	2430.45		3.35801	0.483212
2022-05-20 16:36:25
2022-05-20 16:36:30	1714.84		2.77409	0.172657
2022-05-20 16:36:35	1891.06		3.32971	0.3646
2022-05-20 16:36:40	2520.57		4.5287	1.30618
2022-05-20 16:36:45	2876.67		4.87907	1.60615
2022-05-20 16:36:50	5876.72		8.50402	0.737914
2022-05-20 16:36:55	6359.25		7.95018	0.738237
2022-05-20 16:37:00	4690.16		5.24544	0.695309
2022-05-20 16:37:05	6312.48		6.80295	0.648634
2022-05-20 16:37:10	6649.42		7.17642	1.03656
2022-05-20 16:37:15
2022-05-20 16:37:20	6984.78		7.31091	1.07921
2022-05-20 16:37:25
2022-05-20 16:37:30	4275.78		5.12552	0.635284
2022-05-20 16:37:35	3750.33		4.96435	0.807006
2022-05-20 16:37:40	3106.74		4.44012	0.452096
2022-05-20 16:37:45	2455.48		3.66599	0.586022
2022-05-20 16:37:50	1918.94		3.33545	0.520745
2022-05-20 16:37:55
2022-05-20 16:38:00
2022-05-20 16:38:05	3241.25		6.29656	0.638237
2022-05-20 16:38:10	2542.79		4.88274	1.12532
2022-05-20 16:38:15	3298.1		6.52053	1.05112
2022-05-20 16:38:20	3024.85		6.31446	0.462958
2022-05-20 16:38:25	3806.49		5.80675	1.08891
2022-05-20 16:38:30	5706.45		6.97873	0.431522
2022-05-20 16:38:35	7665.6		8.37123	0.469181
2022-05-20 16:38:40	7066.5		7.30622	0.390261
2022-05-20 16:38:45	6773.18		6.37046	0.35609
2022-05-20 16:38:50	6402.92		5.59339	0.538767
2022-05-20 16:38:55	5225.28		4.4276	0.812116
2022-05-20 16:39:00	3947.15		3.22733	0.67045
2022-05-20 16:39:05	4455.87		3.66991	0.462294
2022-05-20 16:39:10
2022-05-20 16:39:15	4705.74		3.99364	0.76839
2022-05-20 16:39:20
2022-05-20 16:39:25	4549.63		4.07967	0.545636
2022-05-20 16:39:30	4159.57		3.87795	0.407017
2022-05-20 16:39:35	3320.52		3.19316	0.72113
2022-05-20 16:39:40	4223.09		4.66228	0.424823
2022-05-20 16:39:45	4535.8		5.07105	0.79625
2022-05-20 16:39:50	3836.17		4.40637	0.343656
2022-05-20 16:39:55	2705.03		3.31326	0.38544
2022-05-20 16:40:00	3636.82		4.44918	0.36838
2022-05-20 16:40:05	3334.9		4.90967	0.242635
2022-05-20 16:40:10	2798.83		5.50445	1.21235
2022-05-20 16:40:15	1791.95		4.28998	0.982952
2022-05-20 16:40:20	2406.78		5.80673	1.66126
2022-05-20 16:40:25
2022-05-20 16:40:30
2022-05-20 16:40:35	2229.37		4.39319	0.793056
2022-05-20 16:40:40	2534.03		5.02201	1.51417
2022-05-20 16:40:45	2674.42		5.09411	0.605434
2022-05-20 16:40:50	3032.09		5.82687	0.684165
2022-05-20 16:40:55
2022-05-20 16:41:00	2669.3		5.25103	0.311517
2022-05-20 16:41:05	3898.16		6.83222	0.674979
2022-05-20 16:41:10	3267.74		5.89687	0.325216
2022-05-20 16:41:15	2071.37		4.04874	0.880787
2022-05-20 16:41:20
2022-05-20 16:41:25
2022-05-20 16:41:30
2022-05-20 16:41:35	2390.64		4.66822	0.388838
2022-05-20 16:41:40	2290.45		4.48272	0.452262
2022-05-20 16:41:45	2123.69		4.74265	0.086837
2022-05-20 16:41:50	2076.28		4.40378	0.33427
2022-05-20 16:41:55
2022-05-20 16:42:00	1932.65		4.05112	0.614557
2022-05-20 16:42:05	2114.35		4.62327	0.210679
2022-05-20 16:42:10	2505.05		5.54554	0.171419
2022-05-20 16:42:15	1907.76		4.14658	0.151365
2022-05-20 16:42:20	2414.5		5.35701	0.284331
2022-05-20 16:42:25	3276.86		7.03486	0.320937
2022-05-20 16:42:30	2821.06		6.12128	0.392385
2022-05-20 16:42:35
2022-05-20 16:42:40	2501.05		5.83159	0.284033
2022-05-20 16:42:45	2231.38		5.15391	0.527331
2022-05-20 16:42:50	3207.78		6.38292	0.384416
2022-05-20 16:42:55	3090.2		6.30087	0.37912
2022-05-20 16:43:00
2022-05-20 16:43:05	1984.76		4.5142	0.303998
2022-05-20 16:43:10	2567.83		6.05139	0.61184
2022-05-20 16:43:15	2335.22		5.71695	0.502689
2022-05-20 16:43:20	1472.01		3.40419	0.270648
2022-05-20 16:43:25	2544.41		5.35272	0.455804
2022-05-20 16:43:30	2339.57		4.49335	0.500619
2022-05-20 16:43:35	2841.16		5.22814	0.489745
2022-05-20 16:43:40	3426.98		6.16507	0.484104
2022-05-20 16:43:45	3176.92		5.43683	0.243204
2022-05-20 16:43:50	2747.61		5.10398	0.667649
2022-05-20 16:43:55	2671.55		5.26218	0.638611
2022-05-20 16:44:00	2595.41		5.3248	0.549314
2022-05-20 16:44:05	2818.29		6.01813	0.524442
2022-05-20 16:44:10	1709.79		3.58098	0.2072
2022-05-20 16:44:15	2429.18		5.10984	0.4348
2022-05-20 16:44:20	2218.68		4.80943	0.670537
2022-05-20 16:44:25	2523.72		5.21819	0.424473
2022-05-20 16:44:30	1894.49		3.94154	0.633163
2022-05-20 16:44:35	3680.13		7.72161	0.448402
2022-05-20 16:44:40	3261.26		6.5004	0.363625
2022-05-20 16:44:45	2562.77		5.58364	0.213513
2022-05-20 16:44:50	2314.98		5.47738	0.243493
2022-05-20 16:44:55	1577.87		4.12346	0.206248
2022-05-20 16:45:00	1285.59		3.68256	0.166882
2022-05-20 16:45:05	1475.19		4.48924	0.216878
2022-05-20 16:45:10	1590.34		5.00054	0.266784
2022-05-20 16:45:15	1296		4.49625	0.250441
2022-05-20 16:45:20	1152.5		4.25768	0.395416
2022-05-20 16:45:25	1234.8		4.14591	0.409084
2022-05-20 16:45:30	1976.46		5.8442	0.569476
2022-05-20 16:45:35	1095.9		2.73462	0.340113
2022-05-20 16:45:40	1602.7		3.87514	1.12438
2022-05-20 16:45:45	2894.34		6.68113	0.663407
2022-05-20 16:45:50	2676.52		6.44934	0.672963
2022-05-20 16:45:55
2022-05-20 16:46:00	2051.68		4.9358	0.37923
2022-05-20 16:46:05	1910.7		4.29258	1.15525
2022-05-20 16:46:10	1969.26		4.6452	0.463898
2022-05-20 16:46:15	2484.64		5.75588	0.368933
2022-05-20 16:46:20	2065.98		4.96974	0.322236
2022-05-20 16:46:25	1540.78		4.0041	0.333932
2022-05-20 16:46:30	2689.36		6.81824	0.476362
2022-05-20 16:46:35	2099.5		4.9844	0.192758
2022-05-20 16:46:40	2015.67		4.70437	0.590088
2022-05-20 16:46:45	2736.63		6.22231	0.48004
2022-05-20 16:46:50	1918.65		4.22019	0.187991
2022-05-20 16:46:55	2994.68		6.79987	0.93716
2022-05-20 16:47:00	1856.99		5.06112	0.493191
2022-05-20 16:47:05	1824.45		5.31987	0.463857
2022-05-20 16:47:10	1598.13		4.74617	0.535471
2022-05-20 16:47:15	1493.79		3.97426	0.711218
2022-05-20 16:47:20	2779.91		7.0331	0.270052
2022-05-20 16:47:25	2040.27		5.10024	0.0893871
2022-05-20 16:47:30	2470.11		6.21751	0.523427
2022-05-20 16:47:35	2541.1		6.21509	0.350238
2022-05-20 16:47:40	2656.45		6.13652	0.658037
2022-05-20 16:47:45	2288.26		5.54168	0.299746
2022-05-20 16:47:50	1915.58		5.42904	0.398156
2022-05-20 16:47:55	2282.08		6.0036	0.322684
2022-05-20 16:48:00	2274.03		5.61277	0.547597
2022-05-20 16:48:05	2182.45		5.2137	0.544597
2022-05-20 16:48:10	2412.05		5.34208	0.302884
2022-05-20 16:48:15	2475.45		5.12765	0.77359
2022-05-20 16:48:20	3625.83		6.89995	0.805332
2022-05-20 16:48:25	2705		5.00839	0.437144
2022-05-20 16:48:30	3308.13		6.17527	0.66761
2022-05-20 16:48:35
2022-05-20 16:48:40	2385.5		4.92017	0.528994
2022-05-20 16:48:45	1578.8		2.99773	0.317349
2022-05-20 16:48:50	3546.78		6.42153	0.645859
2022-05-20 16:48:55	3191.82		5.33252	0.27746
2022-05-20 16:49:00
2022-05-20 16:49:05	2502.35		4.53855	0.418106
2022-05-20 16:49:10	3663.48		6.22044	0.469824
2022-05-20 16:49:15	3901.64		6.58497	0.353372
2022-05-20 16:49:20
2022-05-20 16:49:25	4778.09		7.0147	0.529056
2022-05-20 16:49:30	5066.44		7.305	0.589248
2022-05-20 16:49:35	3569.32		5.60362	0.438073
2022-05-20 16:49:40	3513.22		5.76664	0.487642
2022-05-20 16:49:45
2022-05-20 16:49:50	4149.53		6.44157	0.504534
2022-05-20 16:49:55
2022-05-20 16:50:00	3185.14		5.7686	0.591877
2022-05-20 16:50:05	2215.74		4.38807	0.889454
2022-05-20 16:50:10	1545.04		3.16831	1.3255
2022-05-20 16:50:15	1323.46		2.76853	0.38659
2022-05-20 16:50:20	1794.37		3.86019	0.84202
2022-05-20 16:50:25	1870.8		4.23951	0.502553
2022-05-20 16:50:30	1195.92		2.71536	0.286569
2022-05-20 16:50:35	1426.48		3.72543	0.157043
2022-05-20 16:50:40
2022-05-20 16:50:45	852.725		2.85339	0.541334
2022-05-20 16:50:50
2022-05-20 16:50:55	490.303		1.92005	0.501196
2022-05-20 16:51:00
2022-05-20 16:51:05	1186.51		4.38801	0.283311
2022-05-20 16:51:10	916.031		3.36973	0.67856
2022-05-20 16:51:15	1016.97		3.36756	0.242099
2022-05-20 16:51:20	2641.29		6.78279	0.41057
2022-05-20 16:51:25	1830.51		4.30241	0.355655
2022-05-20 16:51:30	839.709		2.07287	0.435787
2022-05-20 16:51:35	2341.35		5.4345	0.339422
2022-05-20 16:51:40	3164.52		6.56491	0.439439
2022-05-20 16:51:45	3526.94		6.91204	0.385619
2022-05-20 16:51:50	4497.2		8.40758	0.39549
2022-05-20 16:51:55	4204.18		6.98089	0.598485
2022-05-20 16:52:00	2962.72		4.92637	1.2897
2022-05-20 16:52:05	4266.65		7.5792	0.713566
2022-05-20 16:52:10	2307.73		4.7105	0.723065
2022-05-20 16:52:15	1582.72		3.6479	0.58117
2022-05-20 16:52:20	2155.31		5.10427	0.611195
2022-05-20 16:52:25	2957.37		6.21478	1.02503
2022-05-20 16:52:30	1403.49		2.636	0.475066
2022-05-20 16:52:35	1125.4		2.14262	0.822938
2022-05-20 16:52:40	1930.02		3.75767	0.88752
2022-05-20 16:52:45
2022-05-20 16:52:50	2847.47		5.4612	0.532403
2022-05-20 16:52:55	2399.63		5.53759	0.501774
2022-05-20 16:53:00
2022-05-20 16:53:05	1641.14		4.27516	0.647412
2022-05-20 16:53:10	2310.12		5.69543	0.609499
2022-05-20 16:53:15	1486.5		4.49246	0.2317
2022-05-20 16:53:20	1163.49		4.22727	0.231738
2022-05-20 16:53:25
2022-05-20 16:53:30	1463.03		4.75469	0.372653
2022-05-20 16:53:35	1404.93		4.23378	0.192806
2022-05-20 16:53:40	1625.24		4.71852	0.136824
2022-05-20 16:53:45	2596.93		6.35938	0.30675
2022-05-20 16:53:50	2305.4		5.2856	0.131545
2022-05-20 16:53:55	2698.85		6.29138	0.112303
2022-05-20 16:54:00	3118.27		7.10898	0.429227
2022-05-20 16:54:05	3527.64		7.58929	0.28076
2022-05-20 16:54:10	1780.28		3.96429	0.461075
2022-05-20 16:54:15
2022-05-20 16:54:20	3061.08		6.33558	0.777519
2022-05-20 16:54:25	1660.41		3.19223	0.479212
2022-05-20 16:54:30	2708.77		4.26655	1.3172
2022-05-20 16:54:35	1149.93		1.58506	1.46704
2022-05-20 16:54:40	5025.15		6.00839	2.37069
2022-05-20 16:54:45	5516.94		5.73335	0.785821
2022-05-20 16:54:50	7684.29		7.28453	2.2437
2022-05-20 16:54:55	6601.56		5.83901	0.943268
2022-05-20 16:55:00	7174.77		5.95897	1.56712
2022-05-20 16:55:05	7457.09		6.44807	1.17987
2022-05-20 16:55:10	7045.99		6.04673	0.91646
2022-05-20 16:55:15	7320.43		5.87366	0.463167
2022-05-20 16:55:20	6787.71		5.19326	0.780614
2022-05-20 16:55:25
2022-05-20 16:55:30	5822.07		5.6583	0.317355
2022-05-20 16:55:35	5421.99		5.44922	0.337987
2022-05-20 16:55:40	4775.98		5.15336	1.41875
2022-05-20 16:55:45	4100.87		4.92563	0.622271
2022-05-20 16:55:50	3675.92		4.51564	0.499075
2022-05-20 16:55:55	4601.24		6.02942	0.605831
2022-05-20 16:56:00	4028.72		5.81123	0.777522
2022-05-20 16:56:05	3151.09		5.47156	0.439186
2022-05-20 16:56:10	4015.47		6.97704	0.333173
2022-05-20 16:56:15	3289.21		5.62023	0.815283
2022-05-20 16:56:20	2633.35		4.48596	0.605104
2022-05-20 16:56:25	3246.6		5.37922	0.78573
2022-05-20 16:56:30	2500.11		4.03521	0.873587
2022-05-20 16:56:35	2445.13		3.74786	0.390715
2022-05-20 16:56:40	3319.27		4.5595	0.74642
2022-05-20 16:56:45	2719.16		3.71985	1.08334
2022-05-20 16:56:50	3989.66		5.85072	0.705123
2022-05-20 16:56:55	3540.87		5.21821	0.519957
2022-05-20 16:57:00	3046.2		4.48165	0.654111
2022-05-20 16:57:05	2961.09		4.37608	0.51699
2022-05-20 16:57:10
2022-05-20 16:57:15	4476.1		5.97458	0.523398
2022-05-20 16:57:20	3774.81		5.28072	0.446152
2022-05-20 16:57:25	3149.23		4.7409	0.313079
2022-05-20 16:57:30	2653.06		4.02835	0.997553
2022-05-20 16:57:35	2805.15		4.45489	0.635855
2022-05-20 16:57:40	3136.66		5.36748	0.496967
2022-05-20 16:57:45	2660.16		4.47014	0.517603
2022-05-20 16:57:50	2756.44		4.34919	0.346457
2022-05-20 16:57:55	2904.32		4.60571	0.241314
2022-05-20 16:58:00	2049.21		3.2471	0.247178
2022-05-20 16:58:05	2365.27		3.96604	0.612749
2022-05-20 16:58:10	3213.2		5.25007	0.568267
2022-05-20 16:58:15
2022-05-20 16:58:20	2490.6		4.26753	0.489748
2022-05-20 16:58:25	2502.83		4.80148	0.571225
2022-05-20 16:58:30	2274.93		4.77544	0.28078
2022-05-20 16:58:35	1781.63		4.04462	0.482764
2022-05-20 16:58:40	1587.18		3.64604	0.86187
2022-05-20 16:58:45	1651.8		3.65307	0.367591
2022-05-20 16:58:50	2513.41		5.27268	0.79395
2022-05-20 16:58:55	2221.05		4.1151	0.413332
2022-05-20 16:59:00	2844.18		5.57119	0.922175
2022-05-20 16:59:05	2596.39		5.15398	0.546191
2022-05-20 16:59:10
2022-05-20 16:59:15	1706.28		3.09266	0.263124
2022-05-20 16:59:20	2688.91		4.90153	0.124644
2022-05-20 16:59:25	3143.91		5.59044	0.112544
2022-05-20 16:59:30	2211.36		4.07635	0.471316
2022-05-20 16:59:35	2188.76		4.3273	0.505713
2022-05-20 16:59:40	2180.83		4.74546	0.738838
2022-05-20 16:59:45	1721.42		3.9391	0.460562
2022-05-20 16:59:50	2113.77		4.90016	0.392456
2022-05-20 16:59:55
2022-05-20 17:00:05	4094.59		6.06032	0.508688
2022-05-20 17:00:10	4191.93		6.04486	1.0734
2022-05-20 17:00:15	4649.12		6.2798	1.13683
2022-05-20 17:00:20	2257.28		3.09513	0.632219
2022-05-20 17:00:25	3363.75		4.78553	0.502687
2022-05-20 17:00:30	3198.9		4.60784	0.456348
2022-05-20 17:00:35	3265.29		4.57591	0.34921
2022-05-20 17:00:40	3066.83		4.22741	0.59193
2022-05-20 17:00:45	2876.74		4.26667	0.294436
2022-05-20 17:00:50
2022-05-20 17:00:55
2022-05-20 17:01:00	2172.8		4.2232	0.159992
2022-05-20 17:01:05	2548.89		4.87656	0.380988
2022-05-20 17:01:10	1917.66		3.77204	0.50749
2022-05-20 17:01:15	2627.77		5.10251	0.223756
2022-05-20 17:01:20	2051.75		4.02392	0.386326
2022-05-20 17:01:25	3024.31		6.04452	0.253734
2022-05-20 17:01:30	2475.89		4.88537	0.214596
2022-05-20 17:01:35	2440.71		4.3093	0.22283
2022-05-20 17:01:40	3218.51		5.29408	0.23216
2022-05-20 17:01:45
2022-05-20 17:01:50	3179.49		5.09394	0.139149
2022-05-20 17:01:55	2955.55		4.5214	0.335929
2022-05-20 17:02:00	2672.33		4.1734	0.15957
2022-05-20 17:02:05	2120.29		3.58592	0.225871
2022-05-20 17:02:10	2609.79		4.96625	0.349351
2022-05-20 17:02:15	2315.93		4.73764	0.279519
2022-05-20 17:02:20	2537.76		5.02217	0.165052
2022-05-20 17:02:25	2585.72		4.78029	0.341918
2022-05-20 17:02:30	3127.76		5.15055	0.324326
2022-05-20 17:02:35	3354.62		5.22135	0.69955
2022-05-20 17:02:40	2771.52		4.75458	0.413001
2022-05-20 17:02:45	4005.16		6.35486	0.330982
2022-05-20 17:02:50	4282.3		6.43967	0.265612
2022-05-20 17:02:55	4077.68		6.27134	0.30536
2022-05-20 17:03:00	3781		5.98	0.269101
2022-05-20 17:03:05	3846.94		6.40948	0.62431
2022-05-20 17:03:10	3191.68		5.65856	0.483029
2022-05-20 17:03:15	3776.62		7.40651	0.429081
2022-05-20 17:03:20
2022-05-20 17:03:25	2017.28		4.14089	0.992745
2022-05-20 17:03:30	2276.44		4.91381	0.57886
2022-05-20 17:03:35	2114.36		4.82739	0.418241
2022-05-20 17:03:40	2483.85		5.81404	0.407846
2022-05-20 17:03:45	2428.13		6.0086	0.636812
2022-05-20 17:03:50	1112.63		2.93157	0.333238
2022-05-20 17:03:55
2022-05-20 17:04:00
2022-05-20 17:04:05	2206.29		5.11595	0.813106
2022-05-20 17:04:10	2227.03		4.61086	0.436076
2022-05-20 17:04:15	1899.86		3.95189	0.719702
2022-05-20 17:04:20	1865.13		4.02904	0.234724
2022-05-20 17:04:25
2022-05-20 17:04:30
2022-05-20 17:04:35
2022-05-20 17:04:40
2022-05-20 17:04:45	1311.25		2.99083	0.534256
2022-05-20 17:04:50	1499.8		3.40745	0.456243
2022-05-20 17:04:55	1218.38		2.94626	0.202913

## Sheet: flow_raw LD corrected
Date/Time [UTC]	_phi [g/s]	_phi_err	_velo_eff	_velo_eff_err	_frac_optflow_ok	_frac_optflow_ok_ica
2022-05-20 16:05:15	3277.91		6.26433	0.939649
2022-05-20 16:05:20	2177.45		4.29773	0.64466
2022-05-20 16:05:25	2836.32		5.11003	0.766504
2022-05-20 16:05:30	3442.25		6.63477	0.995215
2022-05-20 16:05:35	2433.95		4.30695	0.646042
2022-05-20 16:05:40	2292.11		5.45944	0.818916
2022-05-20 16:05:45	1184.37		3.50931	0.526397
2022-05-20 16:05:50	1242.22		4.61683	0.692524
2022-05-20 16:05:55	930.349		2.90914	0.436371
2022-05-20 16:06:00	1695.16		5.05096	0.757643
2022-05-20 16:06:05	2176.91		5.42372	0.813558
2022-05-20 16:06:10	161.945		1.04022	0.156033
2022-05-20 16:06:15	707.267		2.96752	0.445128
2022-05-20 16:06:20	1424.81		4.41033	0.661549
2022-05-20 16:06:25	373.017		1.63693	0.245539
2022-05-20 16:06:30	40.1147		0.235248	0.0352871
2022-05-20 16:06:35	85.6236		0.37586	0.0563791
2022-05-20 16:06:40	1195.55		2.63827	0.395741
2022-05-20 16:06:45	625.158		2.33901	0.350852
2022-05-20 16:06:50	890.452		4.14699	0.622048
2022-05-20 16:06:55	1443.1		5.84421	0.876632
2022-05-20 16:07:00	818.207		4.11696	0.617544
2022-05-20 16:07:05	2300.55		7.08105	1.06216
2022-05-20 16:07:10	2369.1		6.37198	0.955797
2022-05-20 16:07:15	1634.32		4.05611	0.608416
2022-05-20 16:07:20	575.647		2.66879	0.400318
2022-05-20 16:07:25	-158.202		-0.133353	-0.020003
2022-05-20 16:07:30	628.352		2.08063	0.312095
2022-05-20 16:07:35	867.058		2.06516	0.309775
2022-05-20 16:07:40	453.49		1.67671	0.251506
2022-05-20 16:07:45	830.413		2.06246	0.309369
2022-05-20 16:07:50	-132.029		0.673325	0.100999
2022-05-20 16:07:55	469.347		1.25529	0.188293
2022-05-20 16:08:00	420.98		1.53833	0.23075
2022-05-20 16:08:05	365.846		1.04134	0.156201
2022-05-20 16:08:10	1213.12		3.00182	0.450272
2022-05-20 16:08:15	143.895		0.481637	0.0722456
2022-05-20 16:08:20	778.327		2.44916	0.367373
2022-05-20 16:08:25	1066.13		3.59604	0.539406
2022-05-20 16:08:30	1061.61		3.38356	0.507535
2022-05-20 16:08:35	651.324		2.64027	0.396041
2022-05-20 16:08:40	1565.87		3.92092	0.588138
2022-05-20 16:08:45	2321.91		4.95694	0.743541
2022-05-20 16:08:50	2169.04		4.39224	0.658836
2022-05-20 16:08:55	168.135		0.568169	0.0852253
2022-05-20 16:09:00	418.132		0.894241	0.134136
2022-05-20 16:09:05	685.974		1.96295	0.294442
2022-05-20 16:09:10	67.8373		0.177207	0.026581
2022-05-20 16:09:15	595.248		1.62475	0.243712
2022-05-20 16:09:20	1296.21		2.95563	0.443345
2022-05-20 16:09:25	797.101		2.1141	0.317115
2022-05-20 16:09:30	1306.96		3.28579	0.492869
2022-05-20 16:09:35	2592.02		5.9881	0.898215
2022-05-20 16:09:40	1357.57		3.08279	0.462418
2022-05-20 16:09:45	2594.38		5.39824	0.809736
2022-05-20 16:09:50	1868.78		3.20816	0.481223
2022-05-20 16:09:55	1795.79		4.00227	0.60034
2022-05-20 16:10:00	77.7951		1.06878	0.160317
2022-05-20 16:10:05	784.952		3.40535	0.510802
2022-05-20 16:10:10	1007.02		3.69981	0.554971
2022-05-20 16:10:15	1548.44		3.37555	0.506333
2022-05-20 16:10:20	1714.48		3.13172	0.469757
2022-05-20 16:10:25	2144.41		3.33105	0.499658
2022-05-20 16:10:30	1496.82		2.99951	0.449927
2022-05-20 16:10:35	1390.04		4.30234	0.645351
2022-05-20 16:10:40	1421.5		4.00794	0.601191
2022-05-20 16:10:45	637.92		2.25948	0.338922
2022-05-20 16:10:50	2019.54		5.06627	0.75994
2022-05-20 16:10:55	3569.43		5.96907	0.895361
2022-05-20 16:11:00	4646.2		7.82283	1.17342
2022-05-20 16:11:05	2979.74		4.91647	0.73747
2022-05-20 16:11:10	1956.02		3.66499	0.549749
2022-05-20 16:11:15	3154.33		4.63056	0.694585
2022-05-20 16:11:20	1487.09		3.20815	0.481222
2022-05-20 16:11:25	2264.35		4.13813	0.620719
2022-05-20 16:11:30	3328.9		5.61021	0.841532
2022-05-20 16:11:35	2591.82		4.70729	0.706093
2022-05-20 16:11:40	2038.97		3.68583	0.552874
2022-05-20 16:11:45	1311.5		3.09651	0.464477
2022-05-20 16:11:50	1528.7		3.02892	0.454338
2022-05-20 16:11:55	1139.41		2.67604	0.401406
2022-05-20 16:12:00	635.787		1.95492	0.293238
2022-05-20 16:12:05	988.211		3.4071	0.511066
2022-05-20 16:12:10	536.923		2.49839	0.374759
2022-05-20 16:12:15	192.549		1.12503	0.168755
2022-05-20 16:12:20	1100.31		3.38733	0.5081
2022-05-20 16:12:25	874.668		3.53054	0.52958
2022-05-20 16:12:30	1223.96		4.37051	0.655577
2022-05-20 16:12:35	2151.69		5.65427	0.84814
2022-05-20 16:12:40	1404		3.65536	0.548304
2022-05-20 16:12:45	1334.18		4.03993	0.60599
2022-05-20 16:12:50	1632.52		4.37017	0.655526
2022-05-20 16:12:55	2993.81		6.01792	0.902688
2022-05-20 16:13:00	3003.74		5.78445	0.867668
2022-05-20 16:13:05	3529.85		7.04475	1.05671
2022-05-20 16:13:10	1480.79		4.19989	0.629984
2022-05-20 16:13:15	1018.68		3.57454	0.536181
2022-05-20 16:13:20	1325		4.0522	0.607831
2022-05-20 16:13:25	659.568		2.26122	0.339183
2022-05-20 16:13:30	6.20323		0.0902306	0.0135346
2022-05-20 16:13:35	-68.4619		0.0293173	0.0043976
2022-05-20 16:13:40	1079.36		2.5178	0.37767
2022-05-20 16:13:45	1075.16		3.03464	0.455196
2022-05-20 16:13:50	1527.58		5.29569	0.794354
2022-05-20 16:13:55	226.82		1.23997	0.185996
2022-05-20 16:14:05	624.626		2.44426	0.366639
2022-05-20 16:14:10	604.866		2.37641	0.356462
2022-05-20 16:14:15	356.64		1.55426	0.233139
2022-05-20 16:14:20	310.495		1.31394	0.19709
2022-05-20 16:14:25	744.203		1.9075	0.286124
2022-05-20 16:14:30	965.574		2.33249	0.349873
2022-05-20 16:14:35	674.233		1.91386	0.287079
2022-05-20 16:14:40	659.907		1.51826	0.227739
2022-05-20 16:14:45	196.745		0.319272	0.0478909
2022-05-20 16:14:50	469.965		1.7878	0.26817
2022-05-20 16:14:55	883.467		2.56773	0.38516
2022-05-20 16:15:00	721.881		2.27852	0.341778
2022-05-20 16:15:05	1182.43		3.32781	0.499172
2022-05-20 16:15:10	1297.95		3.12763	0.469145
2022-05-20 16:15:15	1480.86		3.50452	0.525678
2022-05-20 16:15:20	1719.51		4.10694	0.616041
2022-05-20 16:15:25	1619.26		3.43212	0.514818
2022-05-20 16:15:30	1329.84		3.88106	0.582159
2022-05-20 16:15:35	1772.93		4.23038	0.634557
2022-05-20 16:15:40	1753		4.1705	0.625576
2022-05-20 16:15:45	1550.92		4.50331	0.675497
2022-05-20 16:15:50	2002.7		5.56616	0.834925
2022-05-20 16:15:55	2729.09		6.26599	0.939899
2022-05-20 16:16:00	1517.04		3.01891	0.452837
2022-05-20 16:16:05	1529.65		4.07178	0.610767
2022-05-20 16:16:10	1869.81		4.62348	0.693522
2022-05-20 16:16:15	1220.03		3.57504	0.536256
2022-05-20 16:16:20	2332.23		5.74503	0.861754
2022-05-20 16:16:25	2633.4		5.60618	0.840927
2022-05-20 16:16:30	3345.53		6.29614	0.944421
2022-05-20 16:16:35	2833.53		5.05997	0.758995
2022-05-20 16:16:40	3015.22		6.15139	0.922709
2022-05-20 16:16:45	1933.22		4.77263	0.715894
2022-05-20 16:16:50	1022.84		3.28494	0.492741
2022-05-20 16:16:55	957.781		2.84992	0.427488
2022-05-20 16:17:00	1296.58		2.97947	0.446921
2022-05-20 16:17:05	1541.08		3.11299	0.466949
2022-05-20 16:17:10	2009.72		4.02703	0.604055
2022-05-20 16:17:15	1906.06		3.46375	0.519562
2022-05-20 16:17:20	1930.39		3.56869	0.535304
2022-05-20 16:17:25	1661.25		3.53421	0.530131
2022-05-20 16:17:30	1687.17		3.49745	0.524618
2022-05-20 16:17:35	1268.92		3.13849	0.470773
2022-05-20 16:17:40	1116.64		3.2768	0.49152
2022-05-20 16:17:45	927.659		2.40849	0.361273
2022-05-20 16:17:50	1541.53		4.5441	0.681614
2022-05-20 16:17:55	1663.11		5.3221	0.798315
2022-05-20 16:18:00	1236.22		4.65948	0.698921
2022-05-20 16:18:05	1309.79		4.00972	0.601457
2022-05-20 16:18:10	1556.32		4.16916	0.625374
2022-05-20 16:18:15	1471.82		2.94019	0.441028
2022-05-20 16:18:20	1364.8		3.85259	0.577889
2022-05-20 16:18:25	1393.16		3.92672	0.589008
2022-05-20 16:18:30	2166.76		4.06835	0.610253
2022-05-20 16:18:35	1995.22		4.26447	0.639671
2022-05-20 16:18:40	1966.2		4.33214	0.649822
2022-05-20 16:18:45	2940.44		6.04101	0.906152
2022-05-20 16:18:50	1253.16		3.41659	0.512488
2022-05-20 16:18:55	478.37		1.7283	0.259245
2022-05-20 16:19:00	953.829		3.01157	0.451735
2022-05-20 16:19:05	1587.61		3.29402	0.494102
2022-05-20 16:19:10	1263.28		2.45036	0.367554
2022-05-20 16:19:15	1759.46		4.21086	0.63163
2022-05-20 16:19:20	665.639		2.80995	0.421492
2022-05-20 16:19:25	229.599		1.64207	0.246311
2022-05-20 16:19:30	1358.1		3.03139	0.454708
2022-05-20 16:19:35	1049.14		2.30225	0.345338
2022-05-20 16:19:40	858.738		1.79622	0.269434
2022-05-20 16:19:45	625.998		2.07683	0.311524
2022-05-20 16:19:50	2004.03		4.54463	0.681694
2022-05-20 16:19:55	2122.69		4.41785	0.662677
2022-05-20 16:20:00	1863.52		3.70562	0.555843
2022-05-20 16:20:05	799.741		1.95237	0.292856
2022-05-20 16:20:10	1602.28		3.37353	0.506029
2022-05-20 16:20:15	1713.41		4.20045	0.630068
2022-05-20 16:20:20	829.867		2.64673	0.39701
2022-05-20 16:20:25	1364.2		3.8438	0.57657
2022-05-20 16:20:30	1870.9		4.87741	0.731612
2022-05-20 16:20:35	1095.96		4.15453	0.623179
2022-05-20 16:20:40	1529.66		4.71994	0.707991
2022-05-20 16:20:45	2027.97		5.96909	0.895364
2022-05-20 16:20:50	1903.47		4.55385	0.683078
2022-05-20 16:20:55	1998.68		5.25112	0.787669
2022-05-20 16:21:00	2999.12		5.73768	0.860652
2022-05-20 16:21:05	2863.28		5.50988	0.826482
2022-05-20 16:21:10	1544.09		3.42797	0.514196
2022-05-20 16:21:15	1053.4		2.45579	0.368369
2022-05-20 16:21:20	1772.95		3.50683	0.526025
2022-05-20 16:21:25	3056.73		5.0552	0.758279
2022-05-20 16:21:30	1496.3		2.62845	0.394268
2022-05-20 16:21:35	2056.12		3.73051	0.559577
2022-05-20 16:21:40	1143.48		2.66085	0.399127
2022-05-20 16:21:45	454.821		2.18316	0.327474
2022-05-20 16:21:50	736.876		1.68158	0.252236
2022-05-20 16:21:55	1400.59		3.40456	0.510683
2022-05-20 16:22:00	1568.63		2.47341	0.371012
2022-05-20 16:22:05	670.881		1.65812	0.248718
2022-05-20 16:22:10	1249.2		2.53626	0.380439
2022-05-20 16:22:15	1867.84		3.17613	0.476419
2022-05-20 16:22:20	1009.31		2.16472	0.324708
2022-05-20 16:22:25	439.157		1.2701	0.190515
2022-05-20 16:22:30	785.37		1.9173	0.287596
2022-05-20 16:22:35	728.842		1.13327	0.16999
2022-05-20 16:22:40	965.44		2.58451	0.387677
2022-05-20 16:22:45	831.648		2.08724	0.313086
2022-05-20 16:22:50	635.622		1.80697	0.271046
2022-05-20 16:22:55	931.667		2.03837	0.305756
2022-05-20 16:23:00	763.633		2.16741	0.325112
2022-05-20 16:23:05	1315.16		3.35551	0.503326
2022-05-20 16:23:10	1206.78		2.8217	0.423255
2022-05-20 16:23:15	1184.12		2.73519	0.410279
2022-05-20 16:23:20	1176.95		2.79092	0.418637
2022-05-20 16:23:25	1328.83		3.46879	0.520319
2022-05-20 16:23:30	1141.02		3.14934	0.472401
2022-05-20 16:23:35	476.615		1.77222	0.265833
2022-05-20 16:23:40	1437		2.84231	0.426346
2022-05-20 16:23:45	1542.1		2.94937	0.442406
2022-05-20 16:23:50	1058.32		2.33137	0.349705
2022-05-20 16:23:55	709.924		2.69724	0.404586
2022-05-20 16:24:00	457.834		2.59954	0.389931
2022-05-20 16:24:05	1281.23		3.71444	0.557166
2022-05-20 16:24:10	808.311		2.88496	0.432744
2022-05-20 16:24:15	712.192		1.95576	0.293365
2022-05-20 16:24:20	965.752		3.33484	0.500226
2022-05-20 16:24:25	823.69		2.3746	0.35619
2022-05-20 16:24:30	599.636		2.30892	0.346339
2022-05-20 16:24:35	888.081		3.04002	0.456003
2022-05-20 16:24:40	2017.22		5.08748	0.763122
2022-05-20 16:24:45	1509.46		3.8438	0.57657
2022-05-20 16:24:50	1628.48		3.8442	0.57663
2022-05-20 16:24:55	2061.47		4.18185	0.627278
2022-05-20 16:25:00	1759.38		3.63808	0.545712
2022-05-20 16:25:05	2684.11		5.06641	0.759962
2022-05-20 16:25:10	2726.19		5.00789	0.751183
2022-05-20 16:25:15	2808.81		4.68257	0.702385
2022-05-20 16:25:20	2999.68		5.17173	0.77576
2022-05-20 16:25:25	1955.59		3.69065	0.553597
2022-05-20 16:25:30	2842.5		5.25795	0.788692
2022-05-20 16:25:35	2949.52		5.94795	0.892192
2022-05-20 16:25:40	2147.32		4.12481	0.618722
2022-05-20 16:25:45	2193.8		4.04607	0.606911
2022-05-20 16:25:50	2899.68		4.8521	0.727815
2022-05-20 16:25:55	1963.87		3.65494	0.548241
2022-05-20 16:26:00	2430.9		3.73839	0.560759
2022-05-20 16:26:05	2165.39		2.96259	0.444389
2022-05-20 16:26:10	3110.42		4.92145	0.738217
2022-05-20 16:26:15	2712.88		4.68115	0.702172
2022-05-20 16:26:20	1941.28		4.01455	0.602183
2022-05-20 16:26:25	2872.16		5.1701	0.775515
2022-05-20 16:26:30	2886.88		5.1537	0.773055
2022-05-20 16:26:35	3005.86		4.89543	0.734315
2022-05-20 16:26:40	2893.76		5.00618	0.750927
2022-05-20 16:26:45	2449.37		4.03346	0.605019
2022-05-20 16:26:50	1652.31		3.59708	0.539561
2022-05-20 16:26:55	2357.98		3.99882	0.599824
2022-05-20 16:27:00	1636.25		2.73123	0.409685
2022-05-20 16:27:05	1418.39		2.79925	0.419888
2022-05-20 16:27:10	1142.76		2.47925	0.371888
2022-05-20 16:27:15	1140.66		3.04111	0.456167
2022-05-20 16:27:20	2261.5		4.75514	0.71327
2022-05-20 16:27:25	742.397		2.4528	0.36792
2022-05-20 16:27:30	1655.88		4.14317	0.621475
2022-05-20 16:27:35	1656.4		3.66775	0.550163
2022-05-20 16:27:40	1609.23		3.63114	0.54467
2022-05-20 16:27:45	1178.82		3.27577	0.491366
2022-05-20 16:27:50	1133.3		3.64797	0.547196
2022-05-20 16:27:55	1134.75		3.05085	0.457628
2022-05-20 16:28:00	944.255		2.26808	0.340212
2022-05-20 16:28:05	1050.67		2.8543	0.428145
2022-05-20 16:28:10	2926.35		4.8795	0.731925
2022-05-20 16:28:15	2419.23		5.33595	0.800392
2022-05-20 16:28:20	1561.94		3.89587	0.58438
2022-05-20 16:28:25	1632.29		3.99502	0.599253
2022-05-20 16:28:30	2279.5		4.55401	0.683102
2022-05-20 16:28:35	829.31		1.1653	0.174795
2022-05-20 16:28:40	1929.37		4.23841	0.635761
2022-05-20 16:28:45	839.925		2.33388	0.350082
2022-05-20 16:28:50	2360.64		2.7246	0.408691
2022-05-20 16:28:55	1380.51		2.62068	0.393102
2022-05-20 16:29:00	2406		4.0633	0.609495
2022-05-20 16:29:05	1217.52		2.64902	0.397353
2022-05-20 16:29:10	899.797		1.98853	0.298279
2022-05-20 16:29:15	3107.16		5.91818	0.887727
2022-05-20 16:29:20	2363.71		5.18183	0.777275
2022-05-20 16:29:25	2356.68		4.90925	0.736388
2022-05-20 16:29:30	2265.04		5.23467	0.7852
2022-05-20 16:29:35	1205.78		4.12827	0.619241
2022-05-20 16:29:40	843.817		3.15033	0.47255
2022-05-20 16:29:45	1257.01		4.22947	0.634421
2022-05-20 16:29:50	1320.22		3.10229	0.465344
2022-05-20 16:29:55	1945.74		4.84379	0.726568
2022-05-20 16:30:00	1582.39		3.32012	0.498019
2022-05-20 16:30:05	2338.32		5.47994	0.821991
2022-05-20 16:30:10	1838.95		4.09794	0.614691
2022-05-20 16:30:15	3866.7		6.68858	1.00329
2022-05-20 16:30:20	2572.99		5.35564	0.803346
2022-05-20 16:30:25	2816.47		5.35706	0.803559
2022-05-20 16:30:30	2626.26		5.02355	0.753533
2022-05-20 16:30:35	3911.04		6.87153	1.03073
2022-05-20 16:30:40	1526.12		3.45791	0.518687
2022-05-20 16:30:45	2774.27		5.98722	0.898083
2022-05-20 16:30:50	2493.68		5.24863	0.787295
2022-05-20 16:30:55	1140.93		3.17054	0.475582
2022-05-20 16:31:00	1244.96		3.06082	0.459123
2022-05-20 16:31:05	1071.78		3.30233	0.49535
2022-05-20 16:31:10	1015.52		3.37959	0.506938
2022-05-20 16:31:15	841.299		3.24045	0.486067
2022-05-20 16:31:20	1685.93		4.96062	0.744093
2022-05-20 16:31:25	1522.92		4.51827	0.677741
2022-05-20 16:31:30	1443.71		5.00102	0.750153
2022-05-20 16:31:35	2052.01		5.01048	0.751572
2022-05-20 16:31:40	2259.14		5.14872	0.772308
2022-05-20 16:31:45	3378.2		6.65888	0.998832
2022-05-20 16:31:50	3572.84		6.77361	1.01604
2022-05-20 16:31:55	3460		5.35855	0.803783
2022-05-20 16:32:00	4132.99		7.17109	1.07566
2022-05-20 16:32:05	3642.61		7.05122	1.05768
2022-05-20 16:32:10	4818.83		7.40449	1.11067
2022-05-20 16:32:15	2511		4.88315	0.732473
2022-05-20 16:32:20	3908.18		7.36475	1.10471
2022-05-20 16:32:25	3046.95		5.73918	0.860877
2022-05-20 16:32:30	2857.65		5.59563	0.839344
2022-05-20 16:32:35	2280.86		4.93387	0.74008
2022-05-20 16:32:40	2211.43		4.94896	0.742344
2022-05-20 16:32:45	2044.52		4.20355	0.630533
2022-05-20 16:32:50	867.642		1.8871	0.283065
2022-05-20 16:32:55	1279.09		2.34844	0.352266
2022-05-20 16:33:00	1890.32		3.94197	0.591296
2022-05-20 16:33:05	2279.78		4.62011	0.693016
2022-05-20 16:33:10	2938.57		5.53859	0.830789
2022-05-20 16:33:15	2070.65		4.09356	0.614034
2022-05-20 16:33:20	1911.46		4.04788	0.607182
2022-05-20 16:33:25	1725.62		3.86729	0.580093
2022-05-20 16:33:30	3281.84		5.25527	0.788291
2022-05-20 16:33:35	2415.04		5.31488	0.797232
2022-05-20 16:33:40	2427.17		4.12501	0.618752
2022-05-20 16:33:45	3280.78		5.51944	0.827915
2022-05-20 16:33:50	2841.18		3.89055	0.583583
2022-05-20 16:33:55	4356.45		5.97896	0.896845
2022-05-20 16:34:00	4458.52		5.50798	0.826196
2022-05-20 16:34:05	3193.94		3.84099	0.576148
2022-05-20 16:34:10	3334.16		3.95233	0.59285
2022-05-20 16:34:15	4583.22		4.94893	0.74234
2022-05-20 16:34:20	3531.37		4.14663	0.621994
2022-05-20 16:34:25	2913.69		3.46548	0.519822
2022-05-20 16:34:30	4010.76		4.11556	0.617333
2022-05-20 16:34:35	2606.37		3.5445	0.531675
2022-05-20 16:34:40	2291.19		3.28089	0.492134
2022-05-20 16:34:45	571.871		2.04703	0.307054
2022-05-20 16:34:50	986.161		1.47108	0.220662
2022-05-20 16:35:05	2998.59		3.91227	0.586841
2022-05-20 16:35:10	3041.4		4.17907	0.62686
2022-05-20 16:35:15	3344.32		4.09965	0.614947
2022-05-20 16:35:20	2139.1		2.77782	0.416672
2022-05-20 16:35:25	2835.14		2.85355	0.428032
2022-05-20 16:35:30	3555.64		3.88434	0.582651
2022-05-20 16:35:35	4019.89		3.37217	0.505826
2022-05-20 16:35:40	1371.76		2.09422	0.314133
2022-05-20 16:35:45	2868.95		2.89532	0.434299
2022-05-20 16:35:50	3778.1		4.43414	0.665122
2022-05-20 16:35:55	1726.68		2.69589	0.404383
2022-05-20 16:36:00	2388.95		2.89678	0.434517
2022-05-20 16:36:05	-209.508		1.05557	0.158335
2022-05-20 16:36:10	2741.49		3.04896	0.457345
2022-05-20 16:36:15	2614.92		3.28693	0.49304
2022-05-20 16:36:20	696.498		2.02574	0.303861
2022-05-20 16:36:25	483.429		0.836028	0.125404
2022-05-20 16:36:30	637.34		1.49075	0.223612
2022-05-20 16:36:35	1079.35		2.03305	0.304958
2022-05-20 16:36:40	1581.82		2.8776	0.43164
2022-05-20 16:36:45	2136.86		4.45829	0.668744
2022-05-20 16:36:50	5879.66		8.54252	1.28138
2022-05-20 16:36:55	5493.52		7.70239	1.15536
2022-05-20 16:37:00	3867.41		4.29707	0.644561
2022-05-20 16:37:05	4815.32		5.89508	0.884262
2022-05-20 16:37:10	4420.11		6.00985	0.901478
2022-05-20 16:37:15	5152.35		5.86854	0.88028
2022-05-20 16:37:20	5321.67		6.56722	0.985084
2022-05-20 16:37:25	4066.03		5.04084	0.756125
2022-05-20 16:37:30	3996.09		5.00657	0.750986
2022-05-20 16:37:35	3288.53		4.76834	0.715251
2022-05-20 16:37:40	2388.23		3.86493	0.57974
2022-05-20 16:37:45	2142.65		2.8948	0.43422
2022-05-20 16:37:50	1241.58		2.29391	0.344086
2022-05-20 16:37:55	1739.19		2.74126	0.411188
2022-05-20 16:38:00	1932.26		4.23805	0.635707
2022-05-20 16:38:05	2101.23		4.3594	0.65391
2022-05-20 16:38:10	1410.41		3.31844	0.497766
2022-05-20 16:38:15	2726.01		4.88076	0.732114
2022-05-20 16:38:20	3152.88		5.0956	0.764341
2022-05-20 16:38:25	1805.28		4.0625	0.609375
2022-05-20 16:38:30	5255.25		6.01232	0.901847
2022-05-20 16:38:35	7354.58		7.2963	1.09444
2022-05-20 16:38:40	6199.07		5.77777	0.866665
2022-05-20 16:38:45	5719.7		4.73778	0.710666
2022-05-20 16:38:50	5311.55		4.9763	0.746445
2022-05-20 16:38:55	4562.03		3.93803	0.590704
2022-05-20 16:39:00	2815.56		2.066	0.3099
2022-05-20 16:39:05	4039.75		3.1118	0.46677
2022-05-20 16:39:10	661.79		1.50802	0.226203
2022-05-20 16:39:15	2638.33		2.83753	0.425629
2022-05-20 16:39:20	1912.95		2.47414	0.371121
2022-05-20 16:39:25	2923.29		3.16678	0.475017
2022-05-20 16:39:30	3966.64		3.57564	0.536346
2022-05-20 16:39:35	2234.58		2.54294	0.381441
2022-05-20 16:39:40	4034.41		3.98215	0.597323
2022-05-20 16:39:45	4276.34		4.50461	0.675691
2022-05-20 16:39:50	3009.2		3.77973	0.56696
2022-05-20 16:39:55	1631.26		2.54156	0.381234
2022-05-20 16:40:00	2925.34		3.39803	0.509705
2022-05-20 16:40:05	2557.71		3.34017	0.501026
2022-05-20 16:40:10	2641.17		3.86783	0.580174
2022-05-20 16:40:15	1127.43		2.79519	0.419278
2022-05-20 16:40:20	1579.94		3.37868	0.506801
2022-05-20 16:40:25	2188.34		4.0307	0.604605
2022-05-20 16:40:30	3214.89		4.78935	0.718402
2022-05-20 16:40:35	1903.43		3.333	0.499951
2022-05-20 16:40:40	1453.94		2.94138	0.441207
2022-05-20 16:40:45	2811.1		4.19949	0.629923
2022-05-20 16:40:50	3037.9		4.26291	0.639436
2022-05-20 16:40:55	2601.92		4.01188	0.601782
2022-05-20 16:41:00	2146.3		3.48615	0.522923
2022-05-20 16:41:05	3181.78		4.33266	0.649899
2022-05-20 16:41:10	2369.43		3.80478	0.570717
2022-05-20 16:41:15	1183.95		2.75326	0.412989
2022-05-20 16:41:20	227.93		1.56032	0.234048
2022-05-20 16:41:25	22.7597		0.910947	0.136642
2022-05-20 16:41:30	-224.544		1.1286	0.169289
2022-05-20 16:41:35	2206.15		3.07231	0.460846
2022-05-20 16:41:40	2273.03		2.33508	0.350262
2022-05-20 16:41:45	1590.36		2.64657	0.396985
2022-05-20 16:41:50	1481.45		2.33132	0.349698
2022-05-20 16:41:55	647.004		1.69907	0.254861
2022-05-20 16:42:00	1474.08		2.07724	0.311585
2022-05-20 16:42:05	1632.45		1.93613	0.290419
2022-05-20 16:42:10	1496.82		2.65813	0.39872
2022-05-20 16:42:15	966.063		1.79454	0.269181
2022-05-20 16:42:20	1368.34		2.60063	0.390095
2022-05-20 16:42:25	2139.55		4.08427	0.612641
2022-05-20 16:42:30	2394.68		4.21909	0.632863
2022-05-20 16:42:35	1910.69		4.42705	0.664058
2022-05-20 16:42:40	1460.95		3.62319	0.543479
2022-05-20 16:42:45	1187.62		2.89371	0.434057
2022-05-20 16:42:50	2671.29		4.16316	0.624473
2022-05-20 16:42:55	2795.48		4.98094	0.74714
2022-05-20 16:43:00	2001.8		3.89596	0.584393
2022-05-20 16:43:05	1885.63		2.93355	0.440032
2022-05-20 16:43:10	1462.44		2.70254	0.40538
2022-05-20 16:43:15	2100.28		3.67393	0.55109
2022-05-20 16:43:20	1115.25		1.38862	0.208293
2022-05-20 16:43:25	1693.1		3.30998	0.496497
2022-05-20 16:43:30	2330.57		3.44252	0.516377
2022-05-20 16:43:35	2808.78		3.91772	0.587659
2022-05-20 16:43:40	1643.9		3.3426	0.501391
2022-05-20 16:43:45	2126.03		3.85642	0.578462
2022-05-20 16:43:50	762.884		2.4143	0.362145
2022-05-20 16:43:55	1450.62		3.43253	0.51488
2022-05-20 16:44:00	1836.67		4.17189	0.625783
2022-05-20 16:44:05	1663.58		4.70579	0.705869
2022-05-20 16:44:10	1665.25		2.47894	0.371842
2022-05-20 16:44:15	2149.31		3.73668	0.560503
2022-05-20 16:44:20	1842.32		2.94939	0.442409
2022-05-20 16:44:25	2690.21		4.10268	0.615401
2022-05-20 16:44:30	1434.26		2.81804	0.422705
2022-05-20 16:44:35	2626.27		4.88568	0.732852
2022-05-20 16:44:40	3102.57		5.1707	0.775605
2022-05-20 16:44:45	1566.66		3.4385	0.515775
2022-05-20 16:44:50	1180.32		3.50353	0.525529
2022-05-20 16:44:55	1388.17		2.6924	0.40386
2022-05-20 16:45:00	1115.15		2.20157	0.330236
2022-05-20 16:45:05	1308.47		3.03721	0.455582
2022-05-20 16:45:10	1192.59		2.95835	0.443753
2022-05-20 16:45:15	1091.44		2.85853	0.42878
2022-05-20 16:45:20	1002.5		2.91614	0.437421
2022-05-20 16:45:25	959.958		3.58763	0.538144
2022-05-20 16:45:30	1943.34		5.04358	0.756538
2022-05-20 16:45:35	908.234		1.53975	0.230963
2022-05-20 16:45:40	1142.73		2.97117	0.445675
2022-05-20 16:45:45	1787.22		4.89577	0.734366
2022-05-20 16:45:50	2487.46		5.78789	0.868184
2022-05-20 16:45:55	1054.27		3.13045	0.469567
2022-05-20 16:46:00	1575.02		4.08349	0.612524
2022-05-20 16:46:05	1673.3		3.52588	0.528882
2022-05-20 16:46:10	1459.65		3.88039	0.582059
2022-05-20 16:46:15	2255.69		4.32929	0.649393
2022-05-20 16:46:20	649.527		2.75585	0.413377
2022-05-20 16:46:25	692		2.73053	0.409579
2022-05-20 16:46:30	1845.44		5.67365	0.851047
2022-05-20 16:46:35	1206.09		3.93833	0.590749
2022-05-20 16:46:40	1004.57		3.39227	0.50884
2022-05-20 16:46:45	2177.56		5.16656	0.774984
2022-05-20 16:46:50	1566.87		3.39032	0.508548
2022-05-20 16:46:55	2534.12		5.88188	0.882282
2022-05-20 16:47:00	1564.52		4.07305	0.610958
2022-05-20 16:47:05	1350.62		3.97489	0.596233
2022-05-20 16:47:10	1033.65		3.37674	0.506511
2022-05-20 16:47:15	1208.48		3.00183	0.450274
2022-05-20 16:47:20	2013.25		4.38227	0.657341
2022-05-20 16:47:25	1243.07		3.3152	0.49728
2022-05-20 16:47:30	1800.85		4.57109	0.685664
2022-05-20 16:47:35	2172.79		5.21478	0.782217
2022-05-20 16:47:40	1654.58		4.77994	0.716992
2022-05-20 16:47:45	2156.68		4.82096	0.723145
2022-05-20 16:47:50	1181.69		4.41971	0.662957
2022-05-20 16:47:55	1668.42		5.26928	0.790392
2022-05-20 16:48:00	1806.88		4.61778	0.692667
2022-05-20 16:48:05	1656.62		4.23338	0.635007
2022-05-20 16:48:10	1440.67		3.78845	0.568267
2022-05-20 16:48:15	1410.47		3.02641	0.453962
2022-05-20 16:48:20	2869.8		4.77484	0.716226
2022-05-20 16:48:25	2314.18		3.93868	0.590801
2022-05-20 16:48:30	2998.42		5.23006	0.784509
2022-05-20 16:48:35	3014.13		5.25029	0.787544
2022-05-20 16:48:40	2050.72		4.16978	0.625467
2022-05-20 16:48:45	1398.57		2.2218	0.33327
2022-05-20 16:48:50	3906.5		5.12601	0.768902
2022-05-20 16:48:55	2712.57		4.15505	0.623258
2022-05-20 16:49:00	2677.22		4.23287	0.63493
2022-05-20 16:49:05	2321.81		3.57648	0.536472
2022-05-20 16:49:10	3604.52		4.7634	0.71451
2022-05-20 16:49:15	2784.67		3.91526	0.587289
2022-05-20 16:49:20	2586.46		4.11872	0.617808
2022-05-20 16:49:25	4067.94		5.44026	0.816038
2022-05-20 16:49:30	4508.41		6.0521	0.907815
2022-05-20 16:49:35	3755.29		4.36527	0.65479
2022-05-20 16:49:40	3495.38		4.80821	0.721231
2022-05-20 16:49:45	2312.81		3.95111	0.592667
2022-05-20 16:49:50	3782.4		5.52218	0.828328
2022-05-20 16:49:55	2390.93		4.46131	0.669196
2022-05-20 16:50:00	2491.23		4.51823	0.677735
2022-05-20 16:50:05	2117.62		3.06399	0.459598
2022-05-20 16:50:10	1059.67		2.2487	0.337305
2022-05-20 16:50:15	968.722		2.16796	0.325194
2022-05-20 16:50:20	1482		2.99869	0.449804
2022-05-20 16:50:25	1453.87		3.53988	0.530982
2022-05-20 16:50:30	659.828		1.94494	0.291741
2022-05-20 16:50:35	1292.01		2.83516	0.425274
2022-05-20 16:50:40	342.185		1.2813	0.192195
2022-05-20 16:50:45	547.276		1.16331	0.174496
2022-05-20 16:50:50	665.575		2.02817	0.304225
2022-05-20 16:50:55	198.617		0.76925	0.115388
2022-05-20 16:51:00	462.74		2.25811	0.338717
2022-05-20 16:51:05	856.779		3.04919	0.457379
2022-05-20 16:51:10	482.979		1.914	0.2871
2022-05-20 16:51:15	330.79		1.69124	0.253685
2022-05-20 16:51:20	1573.12		4.33404	0.650106
2022-05-20 16:51:25	637.729		2.46875	0.370312
2022-05-20 16:51:30	426.272		0.765398	0.11481
2022-05-20 16:51:35	1433.5		3.35949	0.503923
2022-05-20 16:51:40	2701.58		5.39845	0.809768
2022-05-20 16:51:45	3266.98		5.45958	0.818937
2022-05-20 16:51:50	2960.78		5.065	0.75975
2022-05-20 16:51:55	3414.65		5.12407	0.768611
2022-05-20 16:52:00	2304.9		3.84485	0.576728
2022-05-20 16:52:05	4227.85		6.52168	0.978252
2022-05-20 16:52:10	1930.39		3.6637	0.549556
2022-05-20 16:52:15	1163.04		2.85682	0.428523
2022-05-20 16:52:20	2056.86		4.40502	0.660752
2022-05-20 16:52:25	2814.37		5.23888	0.785832
2022-05-20 16:52:30	392.817		1.34334	0.201501
2022-05-20 16:52:35	527.128		1.57222	0.235834
2022-05-20 16:52:40	1407.65		3.01363	0.452045
2022-05-20 16:52:45	2490.22		4.89249	0.733874
2022-05-20 16:52:50	2701.23		4.72905	0.709358
2022-05-20 16:52:55	2126.62		4.30055	0.645083
2022-05-20 16:53:00	2866.85		6.38289	0.957434
2022-05-20 16:53:05	1302.97		3.19369	0.479054
2022-05-20 16:53:10	1403.79		4.12962	0.619443
2022-05-20 16:53:15	1207.9		3.5207	0.528105
2022-05-20 16:53:20	947.297		2.70336	0.405504
2022-05-20 16:53:25	896.036		2.37348	0.356021
2022-05-20 16:53:30	1205.56		3.08792	0.463188
2022-05-20 16:53:35	944.73		2.70731	0.406096
2022-05-20 16:53:40	913.953		2.83772	0.425659
2022-05-20 16:53:45	1212.57		3.59169	0.538753
2022-05-20 16:53:50	1062.97		2.62452	0.393677
2022-05-20 16:53:55	1193.71		2.58427	0.38764
2022-05-20 16:54:00	1777.38		3.73291	0.559936
2022-05-20 16:54:05	2097.05		4.48983	0.673475
2022-05-20 16:54:10	1063.55		2.83094	0.424641
2022-05-20 16:54:15	546.347		1.47796	0.221694
2022-05-20 16:54:20	2563.41		4.36102	0.654153
2022-05-20 16:54:25	988.447		2.43199	0.364798
2022-05-20 16:54:30	1492.31		4.00907	0.601361
2022-05-20 16:54:35	943.762		1.60066	0.2401
2022-05-20 16:54:40	2228.17		4.43113	0.66467
2022-05-20 16:54:45	4303.97		5.45749	0.818624
2022-05-20 16:54:50	3335.36		5.52438	0.828658
2022-05-20 16:54:55	5007.59		5.2923	0.793844
2022-05-20 16:55:00	5067.15		4.78681	0.718021
2022-05-20 16:55:05	6335.05		6.03196	0.904794
2022-05-20 16:55:10	5405.96		5.4877	0.823155
2022-05-20 16:55:15	5529.47		5.38675	0.808012
2022-05-20 16:55:20	4211.42		4.61367	0.69205
2022-05-20 16:55:25	6896.1		5.81119	0.871679
2022-05-20 16:55:30	5527.24		5.70988	0.856483
2022-05-20 16:55:35	4689.21		4.39122	0.658682
2022-05-20 16:55:40	3971.25		4.59893	0.68984
2022-05-20 16:55:45	3491.26		3.77097	0.565645
2022-05-20 16:55:50	3495.05		3.64852	0.547277
2022-05-20 16:55:55	3519.84		4.80007	0.72001
2022-05-20 16:56:00	3035.83		4.63607	0.69541
2022-05-20 16:56:05	1984.51		3.85513	0.578269
2022-05-20 16:56:10	2406.64		5.20179	0.780268
2022-05-20 16:56:15	2189.68		3.84979	0.577469
2022-05-20 16:56:20	1224.64		2.94475	0.441712
2022-05-20 16:56:25	2518.38		4.52822	0.679233
2022-05-20 16:56:30	1992.19		3.30604	0.495906
2022-05-20 16:56:35	1797.17		2.91363	0.437045
2022-05-20 16:56:40	3378.87		3.79853	0.56978
2022-05-20 16:56:45	778.577		2.65216	0.397825
2022-05-20 16:56:50	2136.43		4.23367	0.63505
2022-05-20 16:56:55	2222.72		3.77039	0.565559
2022-05-20 16:57:00	2022.43		3.50163	0.525244
2022-05-20 16:57:05	1098.23		2.37981	0.356972
2022-05-20 16:57:10	2099.69		3.48377	0.522566
2022-05-20 16:57:15	3321.82		5.17054	0.77558
2022-05-20 16:57:20	2517.14		3.77385	0.566077
2022-05-20 16:57:25	567.538		1.57723	0.236585
2022-05-20 16:57:30	1028.71		2.77579	0.416368
2022-05-20 16:57:35	1230.68		2.82453	0.42368
2022-05-20 16:57:40	2454.97		4.16571	0.624856
2022-05-20 16:57:45	2472.57		3.52572	0.528858
2022-05-20 16:57:50	2678.4		3.61627	0.542441
2022-05-20 16:57:55	2364.14		3.4818	0.52227
2022-05-20 16:58:00	861.661		1.84918	0.277376
2022-05-20 16:58:05	1752.88		3.17416	0.476123
2022-05-20 16:58:10	2286.94		3.65707	0.54856
2022-05-20 16:58:15	2350.19		4.03845	0.605768
2022-05-20 16:58:20	2225.19		3.42138	0.513207
2022-05-20 16:58:25	2226.49		3.90321	0.585481
2022-05-20 16:58:30	1438.06		3.2932	0.493979
2022-05-20 16:58:35	919.836		2.46487	0.36973
2022-05-20 16:58:40	1404.14		3.06872	0.460307
2022-05-20 16:58:45	1490.81		3.10268	0.465403
2022-05-20 16:58:50	2641.3		4.77925	0.716888
2022-05-20 16:58:55	1706.9		3.5264	0.52896
2022-05-20 16:59:00	1817.5		4.06145	0.609217
2022-05-20 16:59:05	2047.55		4.6307	0.694606
2022-05-20 16:59:10	2402.44		5.02329	0.753494
2022-05-20 16:59:15	678.724		2.06227	0.30934
2022-05-20 16:59:20	1527.91		3.42755	0.514132
2022-05-20 16:59:25	1871.71		3.40479	0.510719
2022-05-20 16:59:30	1108.32		2.2971	0.344564
2022-05-20 16:59:35	1555		3.19843	0.479764
2022-05-20 16:59:40	2235.46		3.81473	0.572209
2022-05-20 16:59:45	1182.5		3.05217	0.457825
2022-05-20 16:59:50	1400.04		3.63667	0.5455
2022-05-20 16:59:55	2547.09		6.12783	0.919175
2022-05-20 17:00:05	3407.5		5.79013	0.86852
2022-05-20 17:00:10	3744.69		5.62622	0.843933
2022-05-20 17:00:15	4464.08		5.62071	0.843107
2022-05-20 17:00:20	1042.37		2.10267	0.3154
2022-05-20 17:00:25	2871.64		3.86958	0.580438
2022-05-20 17:00:30	2658.57		3.51985	0.527978
2022-05-20 17:00:35	2370.98		3.49239	0.523859
2022-05-20 17:00:40	1175.28		2.45002	0.367503
2022-05-20 17:00:45	1185.41		2.5512	0.38268
2022-05-20 17:00:50	107.462		1.40012	0.210018
2022-05-20 17:00:55	227.691		1.09301	0.163951
2022-05-20 17:01:00	1336.78		2.92717	0.439075
2022-05-20 17:01:05	1982.83		3.77627	0.566441
2022-05-20 17:01:10	1412.12		2.67254	0.400881
2022-05-20 17:01:15	1545.4		2.91626	0.437438
2022-05-20 17:01:20	1822.29		3.26191	0.489286
2022-05-20 17:01:25	2561.97		4.90382	0.735572
2022-05-20 17:01:30	2357.97		3.8011	0.570164
2022-05-20 17:01:35	2129.61		3.3673	0.505096
2022-05-20 17:01:40	2450.2		3.6952	0.55428
2022-05-20 17:01:45	583.967		0.465861	0.0698791
2022-05-20 17:01:50	1969.18		3.11201	0.466801
2022-05-20 17:01:55	1492.38		2.08641	0.312962
2022-05-20 17:02:00	1926.26		2.67665	0.401498
2022-05-20 17:02:05	1658.72		2.3259	0.348885
2022-05-20 17:02:10	1463.95		2.92043	0.438064
2022-05-20 17:02:15	1927.91		3.33888	0.500832
2022-05-20 17:02:20	1367.38		2.7637	0.414555
2022-05-20 17:02:25	1673.23		3.03364	0.455046
2022-05-20 17:02:30	2096.67		3.1691	0.475365
2022-05-20 17:02:35	2921.36		4.46908	0.670362
2022-05-20 17:02:40	1998.07		3.88947	0.583421
2022-05-20 17:02:45	2886.75		5.01428	0.752142
2022-05-20 17:02:50	3672.15		5.71195	0.856793
2022-05-20 17:02:55	1730.91		3.99211	0.598817
2022-05-20 17:03:00	2921.5		5.34431	0.801647
2022-05-20 17:03:05	2167.07		4.32055	0.648083
2022-05-20 17:03:10	2221.58		4.61956	0.692935
2022-05-20 17:03:15	3374.42		6.63441	0.995162
2022-05-20 17:03:20	2022.31		5.29769	0.794653
2022-05-20 17:03:25	1528.31		3.3003	0.495045
2022-05-20 17:03:30	906.041		3.12564	0.468847
2022-05-20 17:03:35	1619.02		4.03585	0.605377
2022-05-20 17:03:40	1388.56		3.64636	0.546953
2022-05-20 17:03:45	2407.71		5.55163	0.832744
2022-05-20 17:03:50	478.464		1.92623	0.288935
2022-05-20 17:03:55	368.786		0.95603	0.143405
2022-05-20 17:04:00	-33.0515		0.859444	0.128917
2022-05-20 17:04:05	1593.13		3.95784	0.593676
2022-05-20 17:04:10	1755.17		3.85201	0.577801
2022-05-20 17:04:15	1064.07		2.79641	0.419461
2022-05-20 17:04:20	579.59		2.86565	0.429848
2022-05-20 17:04:25	15.4611		0.0769347	0.0115402
2022-05-20 17:04:30	41.9386		0.168957	0.0253435
2022-05-20 17:04:35	-0.149382		0.0169918	0.00254877
2022-05-20 17:04:40	-143.355		-0.142721	-0.0214082
2022-05-20 17:04:45	733.456		2.19441	0.329161
2022-05-20 17:04:50	955.282		1.87335	0.281002
2022-05-20 17:04:55	959.399		1.73855	0.260783
