# Supplementary material for: A new permanent, low-cost, low-power SO2 camera for continuous measurement of volcanic emissions
Source: Frontiers journal article supplement (doi:10.3389/feart.2023.1088992), 2023-04-04
Supplement: Table_2.xlsx [file Table_2.xlsx]

## Sheet: Light dilution corrected
Date/Time [BST, UTC+1]	_phi [g/s]	_phi_err	_velo_eff	_velo_eff_err	_frac_optflow_ok	_frac_optflow_ok_ica
2022-07-25 21:01:05	7727.15		9.66351	0
2022-07-25 21:01:10	6662.47		9.66351	0
2022-07-25 21:01:15	7007.05		9.66351	0
2022-07-25 21:01:20	7070.62		9.66351	0
2022-07-25 21:01:25	6865.06		9.66351	0
2022-07-25 21:01:30	6222.45		9.66351	0
2022-07-25 21:01:35	5847.11		9.66351	0
2022-07-25 21:01:40	6813.57		9.66351	0
2022-07-25 21:01:45	7787.62		9.66351	0
2022-07-25 21:01:50	9232.88		9.66351	0
2022-07-25 21:01:55	11086.3		9.66351	0
2022-07-25 21:02:00	12551.5		9.66351	0
2022-07-25 21:02:05	14721.6		9.66351	0
2022-07-25 21:02:10	16816		9.66351	0
2022-07-25 21:02:15	20232.1		9.66351	0
2022-07-25 21:02:20	22181.3		9.66351	0
2022-07-25 21:02:25	23286.4		9.66351	0
2022-07-25 21:02:30	22517.7		9.66351	0
2022-07-25 21:02:35	20969.9		9.66351	0
2022-07-25 21:02:40	18141.5		9.66351	0
2022-07-25 21:02:45	20149.5		9.66351	0
2022-07-25 21:02:50	21590.4		9.66351	0
2022-07-25 21:02:55	21092.1		9.66351	0
2022-07-25 21:03:00	22905.6		9.66351	0
2022-07-25 21:03:05	20933.3		9.66351	0
2022-07-25 21:03:10	19205.1		9.66351	0
2022-07-25 21:03:15	15200.8		9.66351	0
2022-07-25 21:03:20	11053.7		9.66351	0
2022-07-25 21:03:25	7830.83		9.66351	0
2022-07-25 21:03:30	4834.3		9.66351	0
2022-07-25 21:03:35	3763.68		9.66351	0
2022-07-25 21:03:40	4470.22		9.66351	0
2022-07-25 21:03:45	6494.51		9.66351	0
2022-07-25 21:03:50	7935.69		9.66351	0
2022-07-25 21:03:55	7992.02		9.66351	0
2022-07-25 21:04:00	9529.14		9.66351	0
2022-07-25 21:04:05	8117.41		9.66351	0
2022-07-25 21:04:10	7949.18		9.66351	0
2022-07-25 21:04:15	9601.72		9.66351	0
2022-07-25 21:04:20	11031.7		9.66351	0
2022-07-25 21:04:25	13053.4		9.66351	0
2022-07-25 21:04:30	16108.9		9.66351	0
2022-07-25 21:04:35	17557.7		9.66351	0
2022-07-25 21:04:40	20098.1		9.66351	0
2022-07-25 21:04:45	20061.2		9.66351	0
2022-07-25 21:04:50	17616.3		9.66351	0
2022-07-25 21:04:55	17573.9		9.66351	0
2022-07-25 21:05:00	17719.9		9.66351	0
2022-07-25 21:05:05	16693.3		9.66351	0
2022-07-25 21:05:10	15710.3		9.66351	0
2022-07-25 21:05:15	13374.3		9.66351	0
2022-07-25 21:05:20	11833.3		9.66351	0
2022-07-25 21:05:25	11381.1		9.66351	0
2022-07-25 21:05:30	11951.1		9.66351	0
2022-07-25 21:05:35	12594.9		9.66351	0
2022-07-25 21:05:40	13866.6		9.66351	0
2022-07-25 21:05:45	14575.3		9.66351	0
2022-07-25 21:05:50	13889.1		9.66351	0
2022-07-25 21:05:55	12427.2		9.66351	0
2022-07-25 21:06:00	9060.67		9.66351	0
2022-07-25 21:06:05	7591.31		9.66351	0
2022-07-25 21:06:10	6517.69		9.66351	0
2022-07-25 21:06:15	6917.03		9.66351	0
2022-07-25 21:06:20	7149.7		9.66351	0
2022-07-25 21:06:25	8668.76		9.66351	0
2022-07-25 21:06:30	9985.84		9.66351	0
2022-07-25 21:06:35	9825.63		9.66351	0
2022-07-25 21:06:40	11158		9.66351	0
2022-07-25 21:06:45	11167.2		9.66351	0
2022-07-25 21:06:50	9676.89		9.66351	0
2022-07-25 21:06:55	9597.1		9.66351	0
2022-07-25 21:07:00	10107.1		9.66351	0
2022-07-25 21:07:05	9576.78		9.66351	0
2022-07-25 21:07:10	9743.64		9.66351	0
2022-07-25 21:07:15	10396.1		9.66351	0
2022-07-25 21:07:20	10534.1		9.66351	0
2022-07-25 21:07:25	10708.4		9.66351	0
2022-07-25 21:07:30	10490.9		9.66351	0
2022-07-25 21:07:35	9472.56		9.66351	0
2022-07-25 21:07:40	8486.42		9.66351	0
2022-07-25 21:07:45	6825.56		9.66351	0
2022-07-25 21:07:50	5860.3		9.66351	0
2022-07-25 21:07:55	5997.66		9.66351	0
2022-07-25 21:08:00	6913.8		9.66351	0
2022-07-25 21:08:05	8122.49		9.66351	0
2022-07-25 21:08:10	9714.74		9.66351	0
2022-07-25 21:08:15	9656.75		9.66351	0
2022-07-25 21:08:20	10208.6		9.66351	0
2022-07-25 21:08:25	10057.2		9.66351	0
2022-07-25 21:08:30	10379.1		9.66351	0
2022-07-25 21:08:35	10801.9		9.66351	0
2022-07-25 21:08:40	10617		9.66351	0
2022-07-25 21:08:45	10747.7		9.66351	0
2022-07-25 21:08:50	11427.8		9.66351	0
2022-07-25 21:08:55	12304.8		9.66351	0
2022-07-25 21:09:00	11641.3		9.66351	0
2022-07-25 21:09:05	11889.9		9.66351	0
2022-07-25 21:09:10	12958.8		9.66351	0
2022-07-25 21:09:15	12695.5		9.66351	0
2022-07-25 21:09:20	12889.9		9.66351	0
2022-07-25 21:09:25	12979		9.66351	0
2022-07-25 21:09:30	12098		9.66351	0
2022-07-25 21:09:35	12584.3		9.66351	0
2022-07-25 21:09:40	12636.8		9.66351	0
2022-07-25 21:09:45	12065.9		9.66351	0
2022-07-25 21:09:50	11624.4		9.66351	0
2022-07-25 21:09:55	11354		9.66351	0
2022-07-25 21:10:00	10934.1		9.66351	0
2022-07-25 21:10:05	11144.4		9.66351	0
2022-07-25 21:10:10	10387.2		9.66351	0
2022-07-25 21:10:15	11138.8		9.66351	0
2022-07-25 21:10:20	11600.2		9.66351	0
2022-07-25 21:10:25	12643.4		9.66351	0
2022-07-25 21:10:30	14314		9.66351	0
2022-07-25 21:10:35	15566.1		9.66351	0
2022-07-25 21:10:40	16128.2		9.66351	0
2022-07-25 21:10:45	14790.7		9.66351	0
2022-07-25 21:10:50	13850.8		9.66351	0
2022-07-25 21:10:55	12454.9		9.66351	0
2022-07-25 21:11:00	10267.5		9.66351	0
2022-07-25 21:11:05	9179.61		9.66351	0
2022-07-25 21:11:10	7905.2		9.66351	0
2022-07-25 21:11:15	7810.49		9.66351	0
2022-07-25 21:11:20	7648.34		9.66351	0
2022-07-25 21:11:25	6758		9.66351	0
2022-07-25 21:11:30	7268.55		9.66351	0
2022-07-25 21:11:35	8418.05		9.66351	0
2022-07-25 21:11:40	10650.4		9.66351	0
2022-07-25 21:11:45	12150.7		9.66351	0
2022-07-25 21:11:50	13358.8		9.66351	0
2022-07-25 21:11:55	13431.3		9.66351	0
2022-07-25 21:12:00	12911.3		9.66351	0
2022-07-25 21:12:05	12713.3		9.66351	0
2022-07-25 21:12:10	11849.1		9.66351	0
2022-07-25 21:12:15	12249.4		9.66351	0
2022-07-25 21:12:20	11560.1		9.66351	0
2022-07-25 21:12:25	8871.07		9.66351	0
2022-07-25 21:12:30	6515.57		9.66351	0
2022-07-25 21:12:35	4386.94		9.66351	0
2022-07-25 21:12:40	4862.56		9.66351	0
2022-07-25 21:12:45	5389.64		9.66351	0
2022-07-25 21:12:50	5246.17		9.66351	0
2022-07-25 21:12:55	5765.48		9.66351	0
2022-07-25 21:13:00	5225.49		9.66351	0
2022-07-25 21:13:05	4689.37		9.66351	0
2022-07-25 21:13:10	3680.42		9.66351	0
2022-07-25 21:13:15	3102.46		9.66351	0
2022-07-25 21:13:20	3406.12		9.66351	0
2022-07-25 21:13:25	2806.3		9.66351	0
2022-07-25 21:13:30	3093.22		9.66351	0
2022-07-25 21:13:35	3629.25		9.66351	0
2022-07-25 21:13:40	4286.6		9.66351	0
2022-07-25 21:13:45	3961.87		9.66351	0
2022-07-25 21:13:50	3551.89		9.66351	0
2022-07-25 21:13:55	3501.98		9.66351	0
2022-07-25 21:14:00	3355.59		9.66351	0
2022-07-25 21:14:05	3335.31		9.66351	0
2022-07-25 21:14:10	4625.44		9.66351	0
2022-07-25 21:14:15	4491.08		9.66351	0
2022-07-25 21:14:20	5201.11		9.66351	0
2022-07-25 21:14:25	5104.95		9.66351	0
2022-07-25 21:14:30	4574.86		9.66351	0
2022-07-25 21:14:35	5055.62		9.66351	0
2022-07-25 21:14:40	5130.26		9.66351	0
2022-07-25 21:14:45	5093.97		9.66351	0
2022-07-25 21:14:50	3345.96		9.66351	0
2022-07-25 21:14:55	3040.42		9.66351	0
2022-07-25 21:15:00	5058.05		9.66351	0
2022-07-25 21:15:05	6254.14		9.66351	0
2022-07-25 21:15:10	8169.38		9.66351	0
2022-07-25 21:15:15	9206.11		9.66351	0
2022-07-25 21:15:20	9429.75		9.66351	0
2022-07-25 21:15:25	10986.5		9.66351	0
2022-07-25 21:15:30	13265.7		9.66351	0
2022-07-25 21:15:35	14613.5		9.66351	0
2022-07-25 21:15:40	15251.6		9.66351	0
2022-07-25 21:15:45	16227.7		9.66351	0
2022-07-25 21:15:50	15611.4		9.66351	0
2022-07-25 21:15:55	16388.8		9.66351	0
2022-07-25 21:16:00	17389.1		9.66351	0
2022-07-25 21:16:05	18341.6		9.66351	0
2022-07-25 21:16:10	18231.2		9.66351	0
2022-07-25 21:16:15	17801.7		9.66351	0
2022-07-25 21:16:20	17917		9.66351	0
2022-07-25 21:16:25	16583.1		9.66351	0
2022-07-25 21:16:30	16977.4		9.66351	0
2022-07-25 21:16:35	18472.6		9.66351	0
2022-07-25 21:16:40	18130.6		9.66351	0
2022-07-25 21:16:45	14552.7		9.66351	0
2022-07-25 21:16:50	14823.3		9.66351	0
2022-07-25 21:16:55	15420.6		9.66351	0
2022-07-25 21:17:00	16005.3		9.66351	0
2022-07-25 21:17:05	15960.2		9.66351	0
2022-07-25 21:17:10	16649.6		9.66351	0
2022-07-25 21:17:15	16067.2		9.66351	0
2022-07-25 21:17:20	15758.7		9.66351	0
2022-07-25 21:17:25	15226.2		9.66351	0
2022-07-25 21:17:30	15867		9.66351	0
2022-07-25 21:17:35	16440.2		9.66351	0
2022-07-25 21:17:40	13606.1		9.66351	0
2022-07-25 21:17:45	12513.3		9.66351	0
2022-07-25 21:17:50	12071.4		9.66351	0
2022-07-25 21:17:55	12932.7		9.66351	0
2022-07-25 21:18:00	12576.1		9.66351	0
2022-07-25 21:18:05	12513.7		9.66351	0
2022-07-25 21:18:10	12823.6		9.66351	0
2022-07-25 21:18:15	12073.9		9.66351	0
2022-07-25 21:18:20	12644.8		9.66351	0
2022-07-25 21:18:25	13225.4		9.66351	0
2022-07-25 21:18:30	12727.3		9.66351	0
2022-07-25 21:18:35	14068		9.66351	0
2022-07-25 21:18:40	14617.8		9.66351	0
2022-07-25 21:18:45	15988.9		9.66351	0
2022-07-25 21:18:50	16176		9.66351	0
2022-07-25 21:18:55	16356.1		9.66351	0
2022-07-25 21:19:00	16231.2		9.66351	0
2022-07-25 21:19:05	15735.1		9.66351	0
2022-07-25 21:19:10	15597.8		9.66351	0
2022-07-25 21:19:15	15259.5		9.66351	0
2022-07-25 21:19:20	14250.3		9.66351	0
2022-07-25 21:19:25	12845.9		9.66351	0
2022-07-25 21:19:30	11562.9		9.66351	0
2022-07-25 21:19:35	11557.9		9.66351	0
2022-07-25 21:19:40	10323.7		9.66351	0
2022-07-25 21:19:45	10537.9		9.66351	0
2022-07-25 21:19:50	9685.2		9.66351	0
2022-07-25 21:19:55	9894.09		9.66351	0
2022-07-25 21:20:00	9181.66		9.66351	0
2022-07-25 21:20:05	9435.9		9.66351	0
2022-07-25 21:20:10	9717.87		9.66351	0
2022-07-25 21:20:15	9939.33		9.66351	0
2022-07-25 21:20:20	11083.1		9.66351	0
2022-07-25 21:20:25	11204.3		9.66351	0
2022-07-25 21:20:30	11843.8		9.66351	0
2022-07-25 21:20:35	11734.5		9.66351	0
2022-07-25 21:20:40	10699.3		9.66351	0
2022-07-25 21:20:45	9036.72		9.66351	0
2022-07-25 21:20:50	8143.89		9.66351	0
2022-07-25 21:20:55	8472.73		9.66351	0
2022-07-25 21:21:00	8732.55		9.66351	0
2022-07-25 21:21:05	8210.51		9.66351	0
2022-07-25 21:21:10	8206.95		9.66351	0
2022-07-25 21:21:15	7990		9.66351	0
2022-07-25 21:21:20	7731.91		9.66351	0
2022-07-25 21:21:25	8035.94		9.66351	0
2022-07-25 21:21:30	7834		9.66351	0
2022-07-25 21:21:35	9171.82		9.66351	0
2022-07-25 21:21:40	10529.2		9.66351	0
2022-07-25 21:21:45	10558.3		9.66351	0
2022-07-25 21:21:50	11686.9		9.66351	0
2022-07-25 21:21:55	11824		9.66351	0
2022-07-25 21:22:00	11580.9		9.66351	0
2022-07-25 21:22:05	11801.8		9.66351	0
2022-07-25 21:22:10	11375.7		9.66351	0
2022-07-25 21:22:15	10482.3		9.66351	0
2022-07-25 21:22:20	10890.7		9.66351	0
2022-07-25 21:22:25	8626.29		9.66351	0
2022-07-25 21:22:30	5542.44		9.66351	0
2022-07-25 21:22:35	3415.68		9.66351	0
2022-07-25 21:22:40	562.067		9.66351	0
2022-07-25 21:22:45	892.14		9.66351	0
2022-07-25 21:22:50	6245.83		9.66351	0
2022-07-25 21:22:55	6604.19		9.66351	0
2022-07-25 21:23:00	5753.8		9.66351	0
2022-07-25 21:23:05	5128.98		9.66351	0
2022-07-25 21:23:10	2408.34		9.66351	0
2022-07-25 21:23:15	1516.66		9.66351	0
2022-07-25 21:23:20	4892.92		9.66351	0
2022-07-25 21:23:25	5467.5		9.66351	0
2022-07-25 21:23:30	6995.95		9.66351	0
2022-07-25 21:23:35	6930.09		9.66351	0
2022-07-25 21:23:40	7014.28		9.66351	0
2022-07-25 21:23:45	6740.01		9.66351	0
2022-07-25 21:23:50	6673.85		9.66351	0
2022-07-25 21:23:55	5717.64		9.66351	0
2022-07-25 21:24:00	1400.01		9.66351	0
2022-07-25 21:24:05	11.0617		9.66351	0
2022-07-25 21:24:10	2204.28		9.66351	0
2022-07-25 21:24:15	4760.18		9.66351	0
2022-07-25 21:24:20	5178.4		9.66351	0
2022-07-25 21:24:25	4621.41		9.66351	0
2022-07-25 21:24:30	5874.02		9.66351	0
2022-07-25 21:24:35	6932.5		9.66351	0
2022-07-25 21:24:40	7386.08		9.66351	0
2022-07-25 21:24:45	8320.97		9.66351	0
2022-07-25 21:24:50	9615.39		9.66351	0
2022-07-25 21:24:55	10967.9		9.66351	0
2022-07-25 21:25:00	12981		9.66351	0
2022-07-25 21:25:05	14963		9.66351	0
2022-07-25 21:25:10	16446.8		9.66351	0
2022-07-25 21:25:15	17303.8		9.66351	0
2022-07-25 21:25:20	16541.1		9.66351	0
2022-07-25 21:25:25	18191.8		9.66351	0
2022-07-25 21:25:30	18853.9		9.66351	0
2022-07-25 21:25:35	18099.3		9.66351	0
2022-07-25 21:25:40	17418.8		9.66351	0
2022-07-25 21:25:45	17991.1		9.66351	0
2022-07-25 21:25:50	17618.5		9.66351	0
2022-07-25 21:25:55	17636.6		9.66351	0
2022-07-25 21:26:00	17632.5		9.66351	0
2022-07-25 21:26:05	16201.9		9.66351	0
2022-07-25 21:26:10	16014.5		9.66351	0
2022-07-25 21:26:15	15906.4		9.66351	0
2022-07-25 21:26:20	13415.2		9.66351	0
2022-07-25 21:26:25	11520.1		9.66351	0
2022-07-25 21:26:30	10472.2		9.66351	0
2022-07-25 21:26:35	7853.33		9.66351	0
2022-07-25 21:26:40	7604.85		9.66351	0
2022-07-25 21:26:45	7019.1		9.66351	0
2022-07-25 21:26:50	7199.32		9.66351	0
2022-07-25 21:26:55	7384.98		9.66351	0
2022-07-25 21:27:00	7572.12		9.66351	0
2022-07-25 21:27:05	7684.36		9.66351	0
2022-07-25 21:27:10	7943.98		9.66351	0
2022-07-25 21:27:15	8512.87		9.66351	0
2022-07-25 21:27:20	9371.45		9.66351	0
2022-07-25 21:27:25	10119.9		9.66351	0
2022-07-25 21:27:30	9809.51		9.66351	0
2022-07-25 21:27:35	9287.78		9.66351	0
2022-07-25 21:27:40	9616.52		9.66351	0
2022-07-25 21:27:45	9638.12		9.66351	0
2022-07-25 21:27:50	9190.05		9.66351	0
2022-07-25 21:27:55	8734.54		9.66351	0
2022-07-25 21:28:00	8434.91		9.66351	0
2022-07-25 21:28:05	8059.75		9.66351	0
2022-07-25 21:28:10	8092.12		9.66351	0
2022-07-25 21:28:15	8322.15		9.66351	0
2022-07-25 21:28:20	9711.63		9.66351	0
2022-07-25 21:28:25	9553.68		9.66351	0
2022-07-25 21:28:30	9472.02		9.66351	0
2022-07-25 21:28:35	10326.3		9.66351	0
2022-07-25 21:28:40	10476.9		9.66351	0
2022-07-25 21:28:45	10683		9.66351	0
2022-07-25 21:28:50	11515.8		9.66351	0
2022-07-25 21:28:55	12338.7		9.66351	0
2022-07-25 21:29:00	12798.8		9.66351	0
2022-07-25 21:29:05	12696.9		9.66351	0
2022-07-25 21:29:10	11987.8		9.66351	0
2022-07-25 21:29:15	12649.3		9.66351	0
2022-07-25 21:29:20	14250.2		9.66351	0
2022-07-25 21:29:25	16059.1		9.66351	0
2022-07-25 21:29:30	16693.4		9.66351	0
2022-07-25 21:29:35	17784.8		9.66351	0
2022-07-25 21:29:40	19105.7		9.66351	0
2022-07-25 21:29:45	20135		9.66351	0
2022-07-25 21:29:50	21213.1		9.66351	0
2022-07-25 21:29:55	22938.2		9.66351	0
2022-07-25 21:30:00	22867.2		9.66351	0
2022-07-25 21:30:05	22867.5		9.66351	0
2022-07-25 21:30:10	21881.6		9.66351	0
2022-07-25 21:30:15	23086.8		9.66351	0
2022-07-25 21:30:20	23231.6		9.66351	0
2022-07-25 21:30:25	22770.6		9.66351	0
2022-07-25 21:30:30	22854.3		9.66351	0
2022-07-25 21:30:35	22216.3		9.66351	0
2022-07-25 21:30:40	22074.4		9.66351	0
2022-07-25 21:30:45	23078.3		9.66351	0
2022-07-25 21:31:00	25316.3		9.66351	0
2022-07-25 21:31:05	24905.9		9.66351	0
2022-07-25 21:31:10	24735.3		9.66351	0
2022-07-25 21:31:15	25480.3		9.66351	0
2022-07-25 21:31:20	25055.7		9.66351	0
2022-07-25 21:31:25	23832.6		9.66351	0
2022-07-25 21:31:30	22087.5		9.66351	0
2022-07-25 21:31:35	20571.6		9.66351	0
2022-07-25 21:31:40	19400.9		9.66351	0
2022-07-25 21:31:45	17596.5		9.66351	0
2022-07-25 21:31:50	16526		9.66351	0
2022-07-25 21:31:55	15168.1		9.66351	0
2022-07-25 21:32:00	13493.4		9.66351	0
2022-07-25 21:32:05	12544.2		9.66351	0
2022-07-25 21:32:10	12564.2		9.66351	0
2022-07-25 21:32:15	12586.2		9.66351	0
2022-07-25 21:32:20	13141.5		9.66351	0
2022-07-25 21:32:25	12940.7		9.66351	0
2022-07-25 21:32:30	11552.6		9.66351	0
2022-07-25 21:32:35	11580.7		9.66351	0
2022-07-25 21:32:40	12406.5		9.66351	0
2022-07-25 21:32:45	13157.2		9.66351	0
2022-07-25 21:32:50	13683.5		9.66351	0
2022-07-25 21:32:55	13737.8		9.66351	0
2022-07-25 21:33:00	12810.7		9.66351	0
2022-07-25 21:33:05	12246.1		9.66351	0
2022-07-25 21:33:10	11057.9		9.66351	0
2022-07-25 21:33:15	9339.03		9.66351	0
2022-07-25 21:33:20	8932.79		9.66351	0
2022-07-25 21:33:25	8136.06		9.66351	0
2022-07-25 21:33:30	8540.95		9.66351	0
2022-07-25 21:33:35	9441.37		9.66351	0
2022-07-25 21:33:40	9573.51		9.66351	0
2022-07-25 21:33:45	10463.1		9.66351	0
2022-07-25 21:33:50	10113.3		9.66351	0
2022-07-25 21:33:55	10157		9.66351	0
2022-07-25 21:34:00	10126.1		9.66351	0
2022-07-25 21:34:05	10091.5		9.66351	0
2022-07-25 21:34:10	9863.39		9.66351	0
2022-07-25 21:34:15	10293.4		9.66351	0
2022-07-25 21:34:20	10803.6		9.66351	0
2022-07-25 21:34:25	11305.7		9.66351	0
2022-07-25 21:34:30	11563.4		9.66351	0
2022-07-25 21:34:35	13142.4		9.66351	0
2022-07-25 21:34:40	12138.1		9.66351	0
2022-07-25 21:34:45	12553.1		9.66351	0
2022-07-25 21:34:50	14049.8		9.66351	0
2022-07-25 21:34:55	15092.5		9.66351	0
2022-07-25 21:35:00	14212.1		9.66351	0
2022-07-25 21:35:05	13716.1		9.66351	0
2022-07-25 21:35:10	13692.5		9.66351	0
2022-07-25 21:35:15	14292.1		9.66351	0
2022-07-25 21:35:20	12988		9.66351	0
2022-07-25 21:35:25	14023.1		9.66351	0
2022-07-25 21:35:30	11924.9		9.66351	0
2022-07-25 21:35:35	11524.4		9.66351	0
2022-07-25 21:35:40	11407.4		9.66351	0
2022-07-25 21:35:45	11723		9.66351	0
2022-07-25 21:35:50	9967.98		9.66351	0
2022-07-25 21:35:55	5709.76		9.66351	0
2022-07-25 21:36:00	3742.92		9.66351	0
2022-07-25 21:36:05	2833.28		9.66351	0
2022-07-25 21:36:10	4116.76		9.66351	0
2022-07-25 21:36:15	6336.62		9.66351	0
2022-07-25 21:36:20	5801.58		9.66351	0
2022-07-25 21:36:25	5158.14		9.66351	0
2022-07-25 21:36:30	4696.44		9.66351	0
2022-07-25 21:36:35	5481.88		9.66351	0
2022-07-25 21:36:40	6929.59		9.66351	0
2022-07-25 21:36:45	9704.94		9.66351	0
2022-07-25 21:36:50	11488.9		9.66351	0
2022-07-25 21:36:55	12107.2		9.66351	0
2022-07-25 21:37:00	11635.9		9.66351	0
2022-07-25 21:37:05	10155.4		9.66351	0
2022-07-25 21:37:10	9677.41		9.66351	0
2022-07-25 21:37:15	10140.8		9.66351	0
2022-07-25 21:37:20	10299.8		9.66351	0
2022-07-25 21:37:25	10699.5		9.66351	0
2022-07-25 21:37:30	10700.8		9.66351	0
2022-07-25 21:37:35	10209.4		9.66351	0
2022-07-25 21:37:40	9615.39		9.66351	0
2022-07-25 21:37:45	8320.96		9.66351	0
2022-07-25 21:37:50	8300.6		9.66351	0
2022-07-25 21:37:55	7476.16		9.66351	0
2022-07-25 21:38:00	4550.58		9.66351	0
2022-07-25 21:38:05	2424.27		9.66351	0
2022-07-25 21:38:10	2196.51		9.66351	0
2022-07-25 21:38:15	1699.64		9.66351	0
2022-07-25 21:38:20	2568.84		9.66351	0
2022-07-25 21:38:25	1315.86		9.66351	0
2022-07-25 21:38:30	3165.77		9.66351	0
2022-07-25 21:38:35	3907.55		9.66351	0
2022-07-25 21:38:40	4139.5		9.66351	0
2022-07-25 21:38:45	4135.28		9.66351	0
2022-07-25 21:38:50	3981.49		9.66351	0
2022-07-25 21:38:55	4574.72		9.66351	0
2022-07-25 21:39:00	2898.84		9.66351	0
2022-07-25 21:39:05	2934.99		9.66351	0
2022-07-25 21:39:10	2521.24		9.66351	0
2022-07-25 21:39:15	1028.72		9.66351	0
2022-07-25 21:39:20	508.744		9.66351	0
2022-07-25 21:39:25	51.2449		9.66351	0
2022-07-25 21:39:30	0	0	9.66351	0
2022-07-25 21:39:35	0	0	9.66351	0
2022-07-25 21:39:40	14.2098		9.66351	0
2022-07-25 21:39:45	21.4235		9.66351	0
2022-07-25 21:39:50	1174.67		9.66351	0
2022-07-25 21:39:55	2470.92		9.66351	0
2022-07-25 21:40:00	4452.94		9.66351	0
2022-07-25 21:40:05	4889.98		9.66351	0
2022-07-25 21:40:10	5065.53		9.66351	0
2022-07-25 21:40:15	4537.05		9.66351	0
2022-07-25 21:40:20	3949.55		9.66351	0
2022-07-25 21:40:25	5330.54		9.66351	0
2022-07-25 21:40:30	7617.07		9.66351	0
2022-07-25 21:40:35	8795.88		9.66351	0
2022-07-25 21:40:40	9060.99		9.66351	0
2022-07-25 21:40:45	9582.49		9.66351	0
2022-07-25 21:40:50	9676.97		9.66351	0
2022-07-25 21:40:55	9800.85		9.66351	0
2022-07-25 21:41:00	9538.49		9.66351	0
2022-07-25 21:41:05	9576.95		9.66351	0
2022-07-25 21:41:10	9143.86		9.66351	0
2022-07-25 21:41:15	10518.1		9.66351	0
2022-07-25 21:41:20	12840.8		9.66351	0
2022-07-25 21:41:25	14653.5		9.66351	0
2022-07-25 21:41:30	15106.4		9.66351	0
2022-07-25 21:41:35	17278.1		9.66351	0
2022-07-25 21:41:40	17225.3		9.66351	0
2022-07-25 21:41:45	16289.5		9.66351	0
2022-07-25 21:41:50	15892.2		9.66351	0
2022-07-25 21:41:55	15539.9		9.66351	0
2022-07-25 21:42:00	15680.3		9.66351	0
2022-07-25 21:42:05	15682.7		9.66351	0
2022-07-25 21:42:10	14772.7		9.66351	0
2022-07-25 21:42:15	13144.6		9.66351	0
2022-07-25 21:42:20	14382.2		9.66351	0
2022-07-25 21:42:25	15582.7		9.66351	0
2022-07-25 21:42:30	17145		9.66351	0
2022-07-25 21:42:35	16741.9		9.66351	0
2022-07-25 21:42:40	15077		9.66351	0
2022-07-25 21:42:45	13267		9.66351	0
2022-07-25 21:42:50	12909.5		9.66351	0
2022-07-25 21:42:55	11663.4		9.66351	0
2022-07-25 21:43:00	10114.3		9.66351	0
2022-07-25 21:43:05	9604.03		9.66351	0
2022-07-25 21:43:10	9830.53		9.66351	0
2022-07-25 21:43:15	10497.7		9.66351	0
2022-07-25 21:43:20	11062.5		9.66351	0
2022-07-25 21:43:25	11912.9		9.66351	0
2022-07-25 21:43:30	12268.1		9.66351	0
2022-07-25 21:43:35	12709.6		9.66351	0
2022-07-25 21:43:40	11748		9.66351	0
2022-07-25 21:43:45	11954		9.66351	0
2022-07-25 21:43:50	12164.6		9.66351	0
2022-07-25 21:43:55	11463.3		9.66351	0
2022-07-25 21:44:00	11074.8		9.66351	0
2022-07-25 21:44:05	11143.9		9.66351	0
2022-07-25 21:44:10	12917.8		9.66351	0
2022-07-25 21:44:15	15122.8		9.66351	0
2022-07-25 21:44:20	15618.1		9.66351	0
2022-07-25 21:44:25	15750.6		9.66351	0
2022-07-25 21:44:30	16447.4		9.66351	0
2022-07-25 21:44:35	15338.6		9.66351	0
2022-07-25 21:44:40	14987		9.66351	0
2022-07-25 21:44:45	15526.2		9.66351	0
2022-07-25 21:44:50	15650.4		9.66351	0
2022-07-25 21:44:55	15368.9		9.66351	0
2022-07-25 21:45:00	14765.4		9.66351	0
2022-07-25 21:45:05	14222.4		9.66351	0
2022-07-25 21:45:10	13620.5		9.66351	0
2022-07-25 21:45:15	13555.4		9.66351	0
2022-07-25 21:45:20	14328.4		9.66351	0
2022-07-25 21:45:25	14608.5		9.66351	0
2022-07-25 21:45:30	14236.1		9.66351	0
2022-07-25 21:45:35	13229.3		9.66351	0
2022-07-25 21:45:40	11361		9.66351	0
2022-07-25 21:45:45	10156.7		9.66351	0
2022-07-25 21:45:50	10101.8		9.66351	0
2022-07-25 21:45:55	11017.7		9.66351	0
2022-07-25 21:46:00	10221.1		9.66351	0
2022-07-25 21:46:05	7900.22		9.66351	0
2022-07-25 21:46:10	5475.66		9.66351	0
2022-07-25 21:46:15	2810.56		9.66351	0
2022-07-25 21:46:20	1511.03		9.66351	0
2022-07-25 21:46:25	779.064		9.66351	0
2022-07-25 21:46:30	652.959		9.66351	0
2022-07-25 21:46:35	1330.84		9.66351	0
2022-07-25 21:46:40	3339.7		9.66351	0
2022-07-25 21:46:45	6431.53		9.66351	0
2022-07-25 21:46:50	8550.31		9.66351	0
2022-07-25 21:46:55	8856.77		9.66351	0
2022-07-25 21:47:00	9422.82		9.66351	0
2022-07-25 21:47:05	9579.36		9.66351	0
2022-07-25 21:47:10	11257.5		9.66351	0
2022-07-25 21:47:15	13128.6		9.66351	0
2022-07-25 21:47:20	13438.5		9.66351	0
2022-07-25 21:47:25	14088.1		9.66351	0
2022-07-25 21:47:30	14529.4		9.66351	0
2022-07-25 21:47:35	17398.3		9.66351	0
2022-07-25 21:47:40	17826.3		9.66351	0
2022-07-25 21:47:45	17605.2		9.66351	0
2022-07-25 21:47:50	17253.3		9.66351	0
2022-07-25 21:47:55	16577.1		9.66351	0
2022-07-25 21:48:00	15487.7		9.66351	0
2022-07-25 21:48:05	14486.1		9.66351	0
2022-07-25 21:48:10	14277.6		9.66351	0
2022-07-25 21:48:15	12683.2		9.66351	0
2022-07-25 21:48:20	11806.4		9.66351	0
2022-07-25 21:48:25	10382.6		9.66351	0
2022-07-25 21:48:30	9788.97		9.66351	0
2022-07-25 21:48:35	10425.8		9.66351	0
2022-07-25 21:48:40	10482.5		9.66351	0
2022-07-25 21:48:45	11444.1		9.66351	0
2022-07-25 21:48:50	13201.8		9.66351	0
2022-07-25 21:48:55	13643.8		9.66351	0
2022-07-25 21:49:00	13293.5		9.66351	0
2022-07-25 21:49:05	13417.2		9.66351	0
2022-07-25 21:49:10	14163.8		9.66351	0
2022-07-25 21:49:15	14971.6		9.66351	0
2022-07-25 21:49:20	15221.7		9.66351	0
2022-07-25 21:49:25	16149.1		9.66351	0
2022-07-25 21:49:30	16591.8		9.66351	0
2022-07-25 21:49:35	17399.3		9.66351	0
2022-07-25 21:49:40	17074.6		9.66351	0
2022-07-25 21:49:45	17764.6		9.66351	0
2022-07-25 21:49:50	17432.4		9.66351	0
2022-07-25 21:49:55	17574		9.66351	0
2022-07-25 21:50:00	17526.5		9.66351	0
2022-07-25 21:50:05	18342.6		9.66351	0
2022-07-25 21:50:10	17701.7		9.66351	0
2022-07-25 21:50:15	16306.3		9.66351	0
2022-07-25 21:50:20	13470.1		9.66351	0
2022-07-25 21:50:25	12664.5		9.66351	0
2022-07-25 21:50:30	11478.2		9.66351	0
2022-07-25 21:50:35	10883		9.66351	0
2022-07-25 21:50:40	9767.48		9.66351	0
2022-07-25 21:50:45	8929.95		9.66351	0
2022-07-25 21:50:50	9193.82		9.66351	0
2022-07-25 21:50:55	9063.8		9.66351	0
2022-07-25 21:51:00	7452.49		9.66351	0
2022-07-25 21:51:05	2835.28		9.66351	0
2022-07-25 21:51:10	967.311		9.66351	0
2022-07-25 21:51:15	960.533		9.66351	0
2022-07-25 21:51:20	1512.58		9.66351	0
2022-07-25 21:51:25	3992.67		9.66351	0
2022-07-25 21:51:30	6207.96		9.66351	0
2022-07-25 21:51:35	7087.25		9.66351	0
2022-07-25 21:51:40	7822.65		9.66351	0
2022-07-25 21:51:45	9503.7		9.66351	0
2022-07-25 21:51:50	10104.8		9.66351	0
2022-07-25 21:51:55	10998.5		9.66351	0
2022-07-25 21:52:00	13413.4		9.66351	0
2022-07-25 21:52:05	14469.1		9.66351	0
2022-07-25 21:52:10	16886.2		9.66351	0
2022-07-25 21:52:15	19051.5		9.66351	0
2022-07-25 21:52:20	19895.7		9.66351	0
2022-07-25 21:52:25	18894.1		9.66351	0
2022-07-25 21:52:30	17141		9.66351	0
2022-07-25 21:52:35	16665.6		9.66351	0
2022-07-25 21:52:40	15393.6		9.66351	0
2022-07-25 21:52:45	14462.9		9.66351	0
2022-07-25 21:52:50	13988.5		9.66351	0
2022-07-25 21:52:55	13946.5		9.66351	0
2022-07-25 21:53:00	14172.6		9.66351	0
2022-07-25 21:53:05	15224.3		9.66351	0
2022-07-25 21:53:10	16679.6		9.66351	0
2022-07-25 21:53:15	16040.5		9.66351	0
2022-07-25 21:53:20	16589.7		9.66351	0
2022-07-25 21:53:25	16077.3		9.66351	0
2022-07-25 21:53:30	15927.8		9.66351	0
2022-07-25 21:53:35	15052.7		9.66351	0
2022-07-25 21:53:40	14678.9		9.66351	0
2022-07-25 21:53:45	13394.3		9.66351	0
2022-07-25 21:53:50	13096.8		9.66351	0
2022-07-25 21:53:55	13581.4		9.66351	0
2022-07-25 21:54:00	12521.1		9.66351	0
2022-07-25 21:54:05	12270.7		9.66351	0
2022-07-25 21:54:10	12383.9		9.66351	0
2022-07-25 21:54:15	11812.5		9.66351	0
2022-07-25 21:54:20	11190		9.66351	0
2022-07-25 21:54:25	11592.3		9.66351	0
2022-07-25 21:54:30	11798.9		9.66351	0
2022-07-25 21:54:35	11852.8		9.66351	0
2022-07-25 21:54:40	13720.2		9.66351	0
2022-07-25 21:54:45	14667.8		9.66351	0
2022-07-25 21:54:50	14997.2		9.66351	0
2022-07-25 21:54:55	15212		9.66351	0
2022-07-25 21:55:00	15353.9		9.66351	0
2022-07-25 21:55:05	14160.5		9.66351	0
2022-07-25 21:55:10	13521.9		9.66351	0
2022-07-25 21:55:15	13440.9		9.66351	0
2022-07-25 21:55:20	15034.8		9.66351	0
2022-07-25 21:55:25	16942.9		9.66351	0
2022-07-25 21:55:30	17417.3		9.66351	0
2022-07-25 21:55:35	17462.1		9.66351	0
2022-07-25 21:55:40	18347		9.66351	0
2022-07-25 21:55:45	19267.2		9.66351	0
2022-07-25 21:55:50	18085.6		9.66351	0
2022-07-25 21:55:55	15754.8		9.66351	0
2022-07-25 21:56:00	13884		9.66351	0
2022-07-25 21:56:05	12426.3		9.66351	0
2022-07-25 21:56:10	11213		9.66351	0
2022-07-25 21:56:15	9229.6		9.66351	0
2022-07-25 21:56:20	8514.16		9.66351	0
2022-07-25 21:56:25	8116.63		9.66351	0
2022-07-25 21:56:30	8356.73		9.66351	0
2022-07-25 21:56:35	9949.32		9.66351	0
2022-07-25 21:56:40	12164.9		9.66351	0
2022-07-25 21:56:45	13025.4		9.66351	0
2022-07-25 21:56:50	13410.3		9.66351	0
2022-07-25 21:56:55	12202.4		9.66351	0
2022-07-25 21:57:00	11249.5		9.66351	0
2022-07-25 21:57:05	9959.21		9.66351	0
2022-07-25 21:57:10	10424.4		9.66351	0
2022-07-25 21:57:15	9599.15		9.66351	0
2022-07-25 21:57:20	6494.43		9.66351	0
2022-07-25 21:57:25	4488.55		9.66351	0
2022-07-25 21:57:30	3632.18		9.66351	0
2022-07-25 21:57:35	2452.96		9.66351	0
2022-07-25 21:57:40	2178.98		9.66351	0
2022-07-25 21:57:45	3235.59		9.66351	0
2022-07-25 21:57:50	4054.53		9.66351	0
2022-07-25 21:57:55	3955.99		9.66351	0
2022-07-25 21:58:00	3736.46		9.66351	0
2022-07-25 21:58:05	3895.61		9.66351	0
2022-07-25 21:58:10	4993.07		9.66351	0
2022-07-25 21:58:15	7481.4		9.66351	0
2022-07-25 21:58:20	10606.2		9.66351	0
2022-07-25 21:58:25	11904.4		9.66351	0
2022-07-25 21:58:30	13361.3		9.66351	0
2022-07-25 21:58:35	14323.6		9.66351	0
2022-07-25 21:58:40	15673.7		9.66351	0
2022-07-25 21:58:45	17438.6		9.66351	0
2022-07-25 21:58:50	16900.8		9.66351	0
2022-07-25 21:58:55	16203		9.66351	0
2022-07-25 21:59:00	15193.6		9.66351	0
2022-07-25 21:59:05	15594.9		9.66351	0
2022-07-25 21:59:10	18167.1		9.66351	0
2022-07-25 21:59:15	18819		9.66351	0
2022-07-25 21:59:20	19580.1		9.66351	0
2022-07-25 21:59:25	18429.8		9.66351	0
2022-07-25 21:59:30	17045.6		9.66351	0
2022-07-25 21:59:35	16184.6		9.66351	0
2022-07-25 21:59:40	15602.6		9.66351	0
2022-07-25 21:59:45	13302.8		9.66351	0
2022-07-25 21:59:50	11988.1		9.66351	0
2022-07-25 21:59:55	11010.2		9.66351	0
2022-07-25 22:00:05	10507.9		9.66351	0
2022-07-25 22:00:10	10834.9		9.66351	0
2022-07-25 22:00:15	11368.5		9.66351	0
2022-07-25 22:00:20	12246.4		9.66351	0
2022-07-25 22:00:25	12810.2		9.66351	0
2022-07-25 22:00:30	14009.9		9.66351	0
2022-07-25 22:00:35	14025.2		9.66351	0
2022-07-25 22:00:40	13971.7		9.66351	0
2022-07-25 22:00:45	13750.9		9.66351	0
2022-07-25 22:00:50	12903.1		9.66351	0
2022-07-25 22:00:55	12567		9.66351	0
2022-07-25 22:01:00	16282.4		12.5626	0
2022-07-25 22:01:05	15598		12.5626	0
2022-07-25 22:01:10	12851.4		12.5626	0
2022-07-25 22:01:15	11421.3		12.5626	0
2022-07-25 22:01:20	11569.1		12.5626	0
2022-07-25 22:01:25	11798.1		12.5626	0
2022-07-25 22:01:30	11706.1		12.5626	0
2022-07-25 22:01:35	12157.7		12.5626	0
2022-07-25 22:01:40	12084		12.5626	0
2022-07-25 22:01:45	11790.2		12.5626	0
2022-07-25 22:01:50	11233.2		12.5626	0
2022-07-25 22:01:55	11750		12.5626	0
2022-07-25 22:02:00	12513.7		12.5626	0
2022-07-25 22:02:05	11761.2		12.5626	0
2022-07-25 22:02:10	11494.4		12.5626	0
2022-07-25 22:02:15	11817.3		12.5626	0
2022-07-25 22:02:20	12070.6		12.5626	0
2022-07-25 22:02:25	10666.2		12.5626	0
2022-07-25 22:02:30	10779.2		12.5626	0
2022-07-25 22:02:35	15484		12.5626	0
2022-07-25 22:02:40	16418.7		12.5626	0
2022-07-25 22:02:45	17216.9		12.5626	0
2022-07-25 22:02:50	17373.8		12.5626	0
2022-07-25 22:02:55	17390.3		12.5626	0
2022-07-25 22:03:00	17167.7		12.5626	0
2022-07-25 22:03:05	16985.6		12.5626	0
2022-07-25 22:03:10	16818		12.5626	0
2022-07-25 22:03:15	16329.2		12.5626	0
2022-07-25 22:03:20	15201.9		12.5626	0
2022-07-25 22:03:25	15174.6		12.5626	0
2022-07-25 22:03:30	14468.6		12.5626	0
2022-07-25 22:03:35	14555.9		12.5626	0
2022-07-25 22:03:40	16033.9		12.5626	0
2022-07-25 22:03:45	17101		12.5626	0
2022-07-25 22:03:50	17562.3		12.5626	0
2022-07-25 22:03:55	18254.7		12.5626	0
2022-07-25 22:04:00	18348.7		12.5626	0
2022-07-25 22:04:05	17619		12.5626	0
2022-07-25 22:04:10	16873.4		12.5626	0
2022-07-25 22:04:15	17050		12.5626	0
2022-07-25 22:04:20	16134.4		12.5626	0
2022-07-25 22:04:25	17104.4		12.5626	0
2022-07-25 22:04:30	17835.4		12.5626	0
2022-07-25 22:04:35	18182.8		12.5626	0
2022-07-25 22:04:40	16973.8		12.5626	0
2022-07-25 22:04:45	17414.4		12.5626	0
2022-07-25 22:04:50	18227.3		12.5626	0
2022-07-25 22:04:55	16332.1		12.5626	0
2022-07-25 22:05:00	15107.4		12.5626	0
2022-07-25 22:05:05	14268		12.5626	0
2022-07-25 22:05:10	13695		12.5626	0
2022-07-25 22:05:15	13300.8		12.5626	0
2022-07-25 22:05:20	14365.8		12.5626	0
2022-07-25 22:05:25	15602.2		12.5626	0
2022-07-25 22:05:30	14245.9		12.5626	0
2022-07-25 22:05:35	15431.8		12.5626	0
2022-07-25 22:05:40	15552.3		12.5626	0
2022-07-25 22:05:45	16493.4		12.5626	0
2022-07-25 22:05:50	17415.4		12.5626	0
2022-07-25 22:05:55	17829.1		12.5626	0
2022-07-25 22:06:00	16597.9		12.5626	0
2022-07-25 22:06:05	13412.3		12.5626	0
2022-07-25 22:06:10	12020.6		12.5626	0
2022-07-25 22:06:15	11528.2		12.5626	0
2022-07-25 22:06:20	11691.7		12.5626	0
2022-07-25 22:06:25	11919.7		12.5626	0
2022-07-25 22:06:30	11960		12.5626	0
2022-07-25 22:06:35	11853.8		12.5626	0
2022-07-25 22:06:40	11569.4		12.5626	0
2022-07-25 22:06:45	10112.8		12.5626	0
2022-07-25 22:06:50	9498.74		12.5626	0
2022-07-25 22:06:55	9114.33		12.5626	0
2022-07-25 22:07:00	9773.46		12.5626	0
2022-07-25 22:07:05	10354.8		12.5626	0
2022-07-25 22:07:10	11199		12.5626	0
2022-07-25 22:07:15	12991.7		12.5626	0
2022-07-25 22:07:20	14572.5		12.5626	0
2022-07-25 22:07:25	14168		12.5626	0
2022-07-25 22:07:30	15280.3		12.5626	0
2022-07-25 22:07:35	14771.3		12.5626	0
2022-07-25 22:07:40	14119.1		12.5626	0
2022-07-25 22:07:45	14214.6		12.5626	0
2022-07-25 22:07:50	14508.4		12.5626	0
2022-07-25 22:07:55	14565.5		12.5626	0
2022-07-25 22:08:00	14399.7		12.5626	0
2022-07-25 22:08:05	13028.1		12.5626	0
2022-07-25 22:08:10	11640.5		12.5626	0
2022-07-25 22:08:15	12010.5		12.5626	0
2022-07-25 22:08:20	12689.1		12.5626	0
2022-07-25 22:08:25	12731.7		12.5626	0
2022-07-25 22:08:30	13683		12.5626	0
2022-07-25 22:08:35	13853.3		12.5626	0
2022-07-25 22:08:40	12741.7		12.5626	0
2022-07-25 22:08:45	11770.3		12.5626	0
2022-07-25 22:08:50	11950.7		12.5626	0
2022-07-25 22:08:55	12305.6		12.5626	0
2022-07-25 22:09:00	13081.2		12.5626	0
2022-07-25 22:09:05	13481.5		12.5626	0
2022-07-25 22:09:10	14316		12.5626	0
2022-07-25 22:09:15	14700.7		12.5626	0
2022-07-25 22:09:20	15086.8		12.5626	0
2022-07-25 22:09:25	16611.6		12.5626	0
2022-07-25 22:09:30	18145.4		12.5626	0
2022-07-25 22:09:35	19115.2		12.5626	0
2022-07-25 22:09:40	19648.4		12.5626	0
2022-07-25 22:09:45	19905.5		12.5626	0
2022-07-25 22:09:50	19354.3		12.5626	0
2022-07-25 22:09:55	19213.2		12.5626	0
2022-07-25 22:10:00	18928.6		12.5626	0
2022-07-25 22:10:05	19149.9		12.5626	0
2022-07-25 22:10:10	19089.6		12.5626	0
2022-07-25 22:10:15	19627.6		12.5626	0
2022-07-25 22:10:20	19586.5		12.5626	0
2022-07-25 22:10:25	19890.7		12.5626	0
2022-07-25 22:10:30	19826.1		12.5626	0
2022-07-25 22:10:35	20992.9		12.5626	0
2022-07-25 22:10:40	21224.7		12.5626	0
2022-07-25 22:10:45	20838.5		12.5626	0
2022-07-25 22:10:50	21752.9		12.5626	0
2022-07-25 22:10:55	20332.4		12.5626	0
2022-07-25 22:11:00	19710.2		12.5626	0
2022-07-25 22:11:05	18979.6		12.5626	0
2022-07-25 22:11:10	18250.7		12.5626	0
2022-07-25 22:11:15	16928.1		12.5626	0
2022-07-25 22:11:20	16668.8		12.5626	0
2022-07-25 22:11:25	15765		12.5626	0
2022-07-25 22:11:30	15096.2		12.5626	0
2022-07-25 22:11:35	14963		12.5626	0
2022-07-25 22:11:40	15212.8		12.5626	0
2022-07-25 22:11:45	15093.9		12.5626	0
2022-07-25 22:11:50	14324.5		12.5626	0
2022-07-25 22:11:55	12056.3		12.5626	0
2022-07-25 22:12:00	11792.8		12.5626	0
2022-07-25 22:12:05	12996		12.5626	0
2022-07-25 22:12:10	12950.8		12.5626	0
2022-07-25 22:12:15	11299.3		12.5626	0
2022-07-25 22:12:20	11193.9		12.5626	0
2022-07-25 22:12:25	10970.6		12.5626	0
2022-07-25 22:12:30	11601.2		12.5626	0
2022-07-25 22:12:35	12754.8		12.5626	0
2022-07-25 22:12:40	12379.2		12.5626	0
2022-07-25 22:12:45	11881.7		12.5626	0
2022-07-25 22:12:50	11444.7		12.5626	0
2022-07-25 22:12:55	10037.8		12.5626	0
2022-07-25 22:13:00	10601.3		12.5626	0
2022-07-25 22:13:05	10590		12.5626	0
2022-07-25 22:13:10	10276.7		12.5626	0
2022-07-25 22:13:15	10022.9		12.5626	0
2022-07-25 22:13:20	9363.22		12.5626	0
2022-07-25 22:13:25	8526.19		12.5626	0
2022-07-25 22:13:30	8699.66		12.5626	0
2022-07-25 22:13:35	7888.88		12.5626	0
2022-07-25 22:13:40	7869.09		12.5626	0
2022-07-25 22:13:45	6982.62		12.5626	0
2022-07-25 22:13:50	7706.81		12.5626	0
2022-07-25 22:13:55	7807		12.5626	0
2022-07-25 22:14:00	8635.99		12.5626	0
2022-07-25 22:14:05	7667.37		12.5626	0
2022-07-25 22:14:10	7891.29		12.5626	0
2022-07-25 22:14:15	8019.81		12.5626	0
2022-07-25 22:14:20	7455.4		12.5626	0
2022-07-25 22:14:25	7604.19		12.5626	0
2022-07-25 22:14:30	7984.22		12.5626	0
2022-07-25 22:14:35	8491.15		12.5626	0
2022-07-25 22:14:40	9302.18		12.5626	0
2022-07-25 22:14:45	9523.87		12.5626	0
2022-07-25 22:14:50	10017		12.5626	0
2022-07-25 22:14:55	10594.9		12.5626	0
2022-07-25 22:15:00	13109.5		12.5626	0
2022-07-25 22:15:05	15914.8		12.5626	0
2022-07-25 22:15:10	16905.1		12.5626	0
2022-07-25 22:15:15	19328.2		12.5626	0
2022-07-25 22:15:20	20739.2		12.5626	0
2022-07-25 22:15:25	21980.3		12.5626	0
2022-07-25 22:15:30	22015.9		12.5626	0
2022-07-25 22:15:35	22675.6		12.5626	0
2022-07-25 22:15:40	23289.6		12.5626	0
2022-07-25 22:15:45	23922.4		12.5626	0
2022-07-25 22:15:50	23942.1		12.5626	0
2022-07-25 22:15:55	23458.3		12.5626	0
2022-07-25 22:16:00	22953.5		12.5626	0
2022-07-25 22:16:05	22752.1		12.5626	0
2022-07-25 22:16:10	22221.7		12.5626	0
2022-07-25 22:16:15	21907.7		12.5626	0
2022-07-25 22:16:20	22295.4		12.5626	0
2022-07-25 22:16:25	22336.2		12.5626	0
2022-07-25 22:16:30	22096.5		12.5626	0
2022-07-25 22:16:35	21879.1		12.5626	0
2022-07-25 22:16:40	21469.4		12.5626	0
2022-07-25 22:16:45	20564.5		12.5626	0
2022-07-25 22:16:50	20661.1		12.5626	0
2022-07-25 22:16:55	19639.3		12.5626	0
2022-07-25 22:17:00	19451.8		12.5626	0
2022-07-25 22:17:05	18054.6		12.5626	0
2022-07-25 22:17:10	17271		12.5626	0
2022-07-25 22:17:15	17000.5		12.5626	0
2022-07-25 22:17:20	17393.3		12.5626	0
2022-07-25 22:17:25	17717.9		12.5626	0
2022-07-25 22:17:30	17385.6		12.5626	0
2022-07-25 22:17:35	15682.5		12.5626	0
2022-07-25 22:17:40	15072.9		12.5626	0
2022-07-25 22:17:45	14609.2		12.5626	0
2022-07-25 22:17:50	13677.7		12.5626	0
2022-07-25 22:17:55	14106.1		12.5626	0
2022-07-25 22:18:00	12401.1		12.5626	0
2022-07-25 22:18:05	11031.2		12.5626	0
2022-07-25 22:18:10	9845.98		12.5626	0
2022-07-25 22:18:15	10406.4		12.5626	0
2022-07-25 22:18:20	10142.7		12.5626	0
2022-07-25 22:18:25	9872.82		12.5626	0
2022-07-25 22:18:30	10172.5		12.5626	0
2022-07-25 22:18:35	10505.3		12.5626	0
2022-07-25 22:18:40	10773.9		12.5626	0
2022-07-25 22:18:45	11369.5		12.5626	0
2022-07-25 22:18:50	11453		12.5626	0
2022-07-25 22:18:55	10843.3		12.5626	0
2022-07-25 22:19:00	10768.4		12.5626	0
2022-07-25 22:19:05	10434.5		12.5626	0
2022-07-25 22:19:10	10716.8		12.5626	0
2022-07-25 22:19:15	11203.2		12.5626	0
2022-07-25 22:19:20	11273.2		12.5626	0
2022-07-25 22:19:25	12043.3		12.5626	0
2022-07-25 22:19:30	11798.2		12.5626	0
2022-07-25 22:19:35	11206.2		12.5626	0
2022-07-25 22:19:40	12015.2		12.5626	0
2022-07-25 22:19:45	13377.1		12.5626	0
2022-07-25 22:19:50	14646.4		12.5626	0
2022-07-25 22:19:55	15018.2		12.5626	0
2022-07-25 22:20:00	14368		12.5626	0
2022-07-25 22:20:05	13324.2		12.5626	0
2022-07-25 22:20:10	12607.1		12.5626	0
2022-07-25 22:20:15	12622.5		12.5626	0
2022-07-25 22:20:20	12605.8		12.5626	0
2022-07-25 22:20:25	12479.1		12.5626	0
2022-07-25 22:20:30	13725.9		12.5626	0
2022-07-25 22:20:35	15526		12.5626	0
2022-07-25 22:20:40	15825.3		12.5626	0
2022-07-25 22:20:45	17614.9		12.5626	0
2022-07-25 22:20:50	18417.3		12.5626	0
2022-07-25 22:20:55	18311.4		12.5626	0
2022-07-25 22:21:00	17834.8		12.5626	0
2022-07-25 22:21:05	17757.3		12.5626	0
2022-07-25 22:21:10	17094.6		12.5626	0
2022-07-25 22:21:15	16861.5		12.5626	0
2022-07-25 22:21:20	16230.7		12.5626	0
2022-07-25 22:21:25	14570.2		12.5626	0
2022-07-25 22:21:30	13581.8		12.5626	0
2022-07-25 22:21:35	13979.6		12.5626	0
2022-07-25 22:21:40	14411.5		12.5626	0
2022-07-25 22:21:45	14387.9		12.5626	0
2022-07-25 22:21:50	14822.4		12.5626	0
2022-07-25 22:21:55	15294.6		12.5626	0
2022-07-25 22:22:00	14102.9		12.5626	0
2022-07-25 22:22:05	13741.3		12.5626	0
2022-07-25 22:22:10	13229.2		12.5626	0
2022-07-25 22:22:15	12633.7		12.5626	0
2022-07-25 22:22:20	12801.4		12.5626	0
2022-07-25 22:22:25	13123.2		12.5626	0
2022-07-25 22:22:30	13906.5		12.5626	0
2022-07-25 22:22:35	14171.7		12.5626	0
2022-07-25 22:22:40	14732.6		12.5626	0
2022-07-25 22:22:45	14692.9		12.5626	0
2022-07-25 22:22:50	15369		12.5626	0
2022-07-25 22:22:55	16079.4		12.5626	0
2022-07-25 22:23:00	17018.4		12.5626	0
2022-07-25 22:23:05	17407.2		12.5626	0
2022-07-25 22:23:10	18098.2		12.5626	0
2022-07-25 22:23:15	18287		12.5626	0
2022-07-25 22:23:20	18890.4		12.5626	0
2022-07-25 22:23:25	18899.7		12.5626	0
2022-07-25 22:23:30	19505		12.5626	0
2022-07-25 22:23:35	19795.8		12.5626	0
2022-07-25 22:23:40	20410.5		12.5626	0
2022-07-25 22:23:45	20656.3		12.5626	0
2022-07-25 22:23:50	20143		12.5626	0
2022-07-25 22:23:55	20362.4		12.5626	0
2022-07-25 22:24:00	19778		12.5626	0
2022-07-25 22:24:05	18119.6		12.5626	0
2022-07-25 22:24:10	16912.7		12.5626	0
2022-07-25 22:24:15	16501.1		12.5626	0
2022-07-25 22:24:20	16487.8		12.5626	0
2022-07-25 22:24:25	16711.3		12.5626	0
2022-07-25 22:24:30	16719.5		12.5626	0
2022-07-25 22:24:35	15237		12.5626	0
2022-07-25 22:24:40	16354.9		12.5626	0
2022-07-25 22:24:45	16279.9		12.5626	0
2022-07-25 22:24:50	15690.8		12.5626	0
2022-07-25 22:24:55	14311.8		12.5626	0
2022-07-25 22:25:00	14513.4		12.5626	0
2022-07-25 22:25:05	15680.4		12.5626	0
2022-07-25 22:25:10	15636.3		12.5626	0
2022-07-25 22:25:15	14391.3		12.5626	0
2022-07-25 22:25:20	13927		12.5626	0
2022-07-25 22:25:25	14905		12.5626	0
2022-07-25 22:25:30	15789		12.5626	0
2022-07-25 22:25:35	14456.4		12.5626	0
2022-07-25 22:25:40	14199.6		12.5626	0
2022-07-25 22:25:45	14797.5		12.5626	0
2022-07-25 22:25:50	15881.6		12.5626	0
2022-07-25 22:25:55	17925.5		12.5626	0
2022-07-25 22:26:00	19379.5		12.5626	0
2022-07-25 22:26:05	19531		12.5626	0
2022-07-25 22:26:10	19857.5		12.5626	0
2022-07-25 22:26:15	17973.5		12.5626	0
2022-07-25 22:26:20	17285		12.5626	0
2022-07-25 22:26:25	16139.5		12.5626	0
2022-07-25 22:26:30	14611.5		12.5626	0
2022-07-25 22:26:35	12399.3		12.5626	0
2022-07-25 22:26:40	12601.3		12.5626	0
2022-07-25 22:26:45	13517.3		12.5626	0
2022-07-25 22:26:50	14699.9		12.5626	0
2022-07-25 22:26:55	16431.4		12.5626	0
2022-07-25 22:27:00	16988		12.5626	0
2022-07-25 22:27:05	17139.2		12.5626	0
2022-07-25 22:27:10	17602.9		12.5626	0
2022-07-25 22:27:15	18574		12.5626	0
2022-07-25 22:27:20	18519		12.5626	0
2022-07-25 22:27:25	19159.5		12.5626	0
2022-07-25 22:27:30	20278.1		12.5626	0
2022-07-25 22:27:35	20621.9		12.5626	0
2022-07-25 22:27:40	20364.1		12.5626	0
2022-07-25 22:27:45	20189.4		12.5626	0
2022-07-25 22:27:50	22218.8		12.5626	0
2022-07-25 22:27:55	24768.5		12.5626	0
2022-07-25 22:28:00	26976.4		12.5626	0
2022-07-25 22:28:05	27975.4		12.5626	0
2022-07-25 22:28:10	27673.1		12.5626	0
2022-07-25 22:28:15	26554.2		12.5626	0
2022-07-25 22:28:20	25841.8		12.5626	0
2022-07-25 22:28:25	23794.7		12.5626	0
2022-07-25 22:28:30	20610.4		12.5626	0
2022-07-25 22:28:35	18756.4		12.5626	0
2022-07-25 22:28:40	15152.9		12.5626	0
2022-07-25 22:28:45	12356.9		12.5626	0
2022-07-25 22:28:50	11251.4		12.5626	0
2022-07-25 22:28:55	10780.8		12.5626	0
2022-07-25 22:29:00	12300.4		12.5626	0
2022-07-25 22:29:05	13046.9		12.5626	0
2022-07-25 22:29:10	12529.2		12.5626	0
2022-07-25 22:29:15	11669.2		12.5626	0
2022-07-25 22:29:20	10907.8		12.5626	0
2022-07-25 22:29:25	10871.1		12.5626	0
2022-07-26 00:00:05	5560.06		8.17353	0
2022-07-26 00:00:10	4184.21		8.17353	0
2022-07-26 00:00:15	4231.46		8.17353	0
2022-07-26 00:00:20	3830.09		8.17353	0
2022-07-26 00:00:25	4409.94		8.17353	0
2022-07-26 00:00:30	5197.63		8.17353	0
2022-07-26 00:00:35	6868.11		8.17353	0
2022-07-26 00:00:40	9111.04		8.17353	0
2022-07-26 00:00:45	12371.8		8.17353	0
2022-07-26 00:00:50	13119		8.17353	0
2022-07-26 00:00:55	13574.6		8.17353	0
2022-07-26 00:01:00	13126.2		8.17353	0
2022-07-26 00:01:05	10434.4		8.17353	0
2022-07-26 00:01:10	8554.93		8.17353	0
2022-07-26 00:01:15	6340.8		8.17353	0
2022-07-26 00:01:20	5803.33		8.17353	0
2022-07-26 00:01:25	5278.29		8.17353	0
2022-07-26 00:01:30	5290.87		8.17353	0
2022-07-26 00:01:35	8586.56		8.17353	0
2022-07-26 00:01:40	9929.01		8.17353	0
2022-07-26 00:01:45	9568.45		8.17353	0
2022-07-26 00:01:50	8876.85		8.17353	0
2022-07-26 00:01:55	7709.56		8.17353	0
2022-07-26 00:02:00	6629.11		8.17353	0
2022-07-26 00:02:05	6070.9		8.17353	0
2022-07-26 00:02:10	5746.74		8.17353	0
2022-07-26 00:02:15	5644.03		8.17353	0
2022-07-26 00:02:20	7776.26		8.17353	0
2022-07-26 00:02:25	6916.87		8.17353	0
2022-07-26 00:02:30	6963.65		8.17353	0
2022-07-26 00:02:35	7566.45		8.17353	0
2022-07-26 00:02:40	8827.4		8.17353	0
2022-07-26 00:02:45	9451.08		8.17353	0
2022-07-26 00:02:50	8722.04		8.17353	0
2022-07-26 00:02:55	7573.81		8.17353	0
2022-07-26 00:03:00	8393.2		8.17353	0
2022-07-26 00:03:05	8108.18		8.17353	0
2022-07-26 00:03:10	6951.86		8.17353	0
2022-07-26 00:03:15	6578.74		8.17353	0
2022-07-26 00:03:20	7995.88		8.17353	0
2022-07-26 00:03:25	8314.05		8.17353	0
2022-07-26 00:03:30	8321.83		8.17353	0
2022-07-26 00:03:35	7333.93		8.17353	0
2022-07-26 00:03:40	7194.7		8.17353	0
2022-07-26 00:03:45	7308.11		8.17353	0
2022-07-26 00:03:50	7702.68		8.17353	0
2022-07-26 00:03:55	7878.17		8.17353	0
2022-07-26 00:04:00	8063.53		8.17353	0
2022-07-26 00:04:05	9052.31		8.17353	0
2022-07-26 00:04:10	9565.94		8.17353	0
2022-07-26 00:04:15	11612.3		8.17353	0
2022-07-26 00:04:20	12268.4		8.17353	0
2022-07-26 00:04:25	14326.9		8.17353	0
2022-07-26 00:04:30	14749.9		8.17353	0
2022-07-26 00:04:35	14409.2		8.17353	0
2022-07-26 00:04:40	15058.2		8.17353	0
2022-07-26 00:04:45	15900.3		8.17353	0
2022-07-26 00:04:50	17322.8		8.17353	0
2022-07-26 00:04:55	17027.9		8.17353	0
2022-07-26 00:05:00	17388.9		8.17353	0
2022-07-26 00:05:05	14815.7		8.17353	0
2022-07-26 00:05:10	11927.8		8.17353	0
2022-07-26 00:05:15	11585.3		8.17353	0
2022-07-26 00:05:20	10575.4		8.17353	0
2022-07-26 00:05:25	11242.7		8.17353	0
2022-07-26 00:05:30	11461.3		8.17353	0
2022-07-26 00:05:35	9130.7		8.17353	0
2022-07-26 00:05:40	8739.13		8.17353	0
2022-07-26 00:05:45	7245.44		8.17353	0
2022-07-26 00:05:50	7869.06		8.17353	0
2022-07-26 00:05:55	9205.73		8.17353	0
2022-07-26 00:06:00	9861.43		8.17353	0
2022-07-26 00:06:05	11951.6		8.17353	0
2022-07-26 00:06:10	13785.9		8.17353	0
2022-07-26 00:06:15	12128.5		8.17353	0
2022-07-26 00:06:20	11380.3		8.17353	0
2022-07-26 00:06:25	12300.5		8.17353	0
2022-07-26 00:06:30	11518.2		8.17353	0
2022-07-26 00:06:35	9851.6		8.17353	0
2022-07-26 00:06:40	9924.59		8.17353	0
2022-07-26 00:06:45	10579.1		8.17353	0
2022-07-26 00:06:50	10246.1		8.17353	0
2022-07-26 00:06:55	10373		8.17353	0
2022-07-26 00:07:00	12494		8.17353	0
2022-07-26 00:07:05	12894.2		8.17353	0
2022-07-26 00:07:10	12521.7		8.17353	0
2022-07-26 00:07:15	10046.8		8.17353	0
2022-07-26 00:07:20	8114.57		8.17353	0
2022-07-26 00:07:25	7169.14		8.17353	0
2022-07-26 00:07:30	6667.33		8.17353	0
2022-07-26 00:07:35	6797.32		8.17353	0
2022-07-26 00:07:40	6671.61		8.17353	0
2022-07-26 00:07:45	6308.79		8.17353	0
2022-07-26 00:07:50	5871.15		8.17353	0
2022-07-26 00:07:55	6113.04		8.17353	0
2022-07-26 00:08:00	6102.29		8.17353	0
2022-07-26 00:08:05	6711.13		8.17353	0
2022-07-26 00:08:10	6747.61		8.17353	0
2022-07-26 00:08:15	6262.4		8.17353	0
2022-07-26 00:08:20	4432.63		8.17353	0
2022-07-26 00:08:25	4986.71		8.17353	0
2022-07-26 00:08:30	5116.58		8.17353	0
2022-07-26 00:08:35	5847.79		8.17353	0
2022-07-26 00:08:40	5652.98		8.17353	0
2022-07-26 00:08:45	4377.16		8.17353	0
2022-07-26 00:08:50	3309.48		8.17353	0
2022-07-26 00:08:55	3277.43		8.17353	0
2022-07-26 00:09:00	3449.78		8.17353	0
2022-07-26 00:09:05	3803.21		8.17353	0
2022-07-26 00:09:10	4754.11		8.17353	0
2022-07-26 00:09:15	4781.12		8.17353	0
2022-07-26 00:09:20	4712.74		8.17353	0
2022-07-26 00:09:25	5306.65		8.17353	0
2022-07-26 00:09:30	5826.02		8.17353	0
2022-07-26 00:09:35	7456.75		8.17353	0
2022-07-26 00:09:40	7769.52		8.17353	0
2022-07-26 00:09:45	8332.75		8.17353	0
2022-07-26 00:09:50	8230.04		8.17353	0
2022-07-26 00:09:55	8505.17		8.17353	0
2022-07-26 00:10:00	9234.53		8.17353	0
2022-07-26 00:10:05	10386.4		8.17353	0
2022-07-26 00:10:10	11607.3		8.17353	0
2022-07-26 00:10:15	11622.2		8.17353	0
2022-07-26 00:10:20	12227.7		8.17353	0
2022-07-26 00:10:25	11796.8		8.17353	0
2022-07-26 00:10:30	11678.9		8.17353	0
2022-07-26 00:10:35	10746.4		8.17353	0
2022-07-26 00:10:40	9509.11		8.17353	0
2022-07-26 00:10:45	10318.6		8.17353	0
2022-07-26 00:10:50	10140.8		8.17353	0
2022-07-26 00:10:55	9501.55		8.17353	0
2022-07-26 00:11:00	9345.7		8.17353	0
2022-07-26 00:11:05	8797.59		8.17353	0
2022-07-26 00:11:10	9653.17		8.17353	0
2022-07-26 00:11:15	9353.99		8.17353	0
2022-07-26 00:11:20	7493.76		8.17353	0
2022-07-26 00:11:25	5660.98		8.17353	0
2022-07-26 00:11:30	4711.77		8.17353	0
2022-07-26 00:11:35	4574.94		8.17353	0
2022-07-26 00:11:40	3488.84		8.17353	0
2022-07-26 00:11:45	4780.1		8.17353	0
2022-07-26 00:11:50	5702.48		8.17353	0
2022-07-26 00:11:55	6236.56		8.17353	0
2022-07-26 00:12:00	5679.4		8.17353	0
2022-07-26 00:12:05	6162.38		8.17353	0
2022-07-26 00:12:10	7211.16		8.17353	0
2022-07-26 00:12:15	7162.76		8.17353	0
2022-07-26 00:12:20	6394.43		8.17353	0
2022-07-26 00:12:25	5712.77		8.17353	0
2022-07-26 00:12:30	7619.09		8.17353	0
2022-07-26 00:12:35	8969.21		8.17353	0
2022-07-26 00:12:40	9263.72		8.17353	0
2022-07-26 00:12:45	9132.47		8.17353	0
2022-07-26 00:12:50	8668.37		8.17353	0
2022-07-26 00:12:55	7673.46		8.17353	0
2022-07-26 00:13:00	6411.94		8.17353	0
2022-07-26 00:13:05	5554.58		8.17353	0
2022-07-26 00:13:10	5281.09		8.17353	0
2022-07-26 00:13:15	5726.47		8.17353	0
2022-07-26 00:13:20	5738.14		8.17353	0
2022-07-26 00:13:25	6766.97		8.17353	0
2022-07-26 00:13:30	7024.41		8.17353	0
2022-07-26 00:13:35	8545.34		8.17353	0
2022-07-26 00:13:40	9468.5		8.17353	0
2022-07-26 00:13:45	9707.32		8.17353	0
2022-07-26 00:13:50	9374.56		8.17353	0
2022-07-26 00:13:55	9016.52		8.17353	0
2022-07-26 00:14:00	5931.01		8.17353	0
2022-07-26 00:14:05	4222.88		8.17353	0
2022-07-26 00:14:10	4291.32		8.17353	0
2022-07-26 00:14:15	3977.38		8.17353	0
2022-07-26 00:14:20	4087.38		8.17353	0
2022-07-26 00:14:25	4988.98		8.17353	0
2022-07-26 00:14:30	5541.24		8.17353	0
2022-07-26 00:14:35	5897		8.17353	0
2022-07-26 00:14:40	8421.77		8.17353	0
2022-07-26 00:14:45	10810.2		8.17353	0
2022-07-26 00:14:50	13361.6		8.17353	0
2022-07-26 00:14:55	13450.5		8.17353	0
2022-07-26 00:15:00	14270.3		8.17353	0
2022-07-26 00:15:05	14036		8.17353	0
2022-07-26 00:15:10	13669.6		8.17353	0
2022-07-26 00:15:15	13630.3		8.17353	0
2022-07-26 00:15:20	11982.9		8.17353	0
2022-07-26 00:15:25	11158.7		8.17353	0
2022-07-26 00:15:30	10765.4		8.17353	0
2022-07-26 00:15:35	10000.4		8.17353	0
2022-07-26 00:15:40	9041.03		8.17353	0
2022-07-26 00:15:45	6793.53		8.17353	0
2022-07-26 00:15:50	6438.31		8.17353	0
2022-07-26 00:15:55	7108.96		8.17353	0
2022-07-26 00:16:00	5933.87		8.17353	0
2022-07-26 00:16:05	6302.68		8.17353	0
2022-07-26 00:16:10	7462.84		8.17353	0
2022-07-26 00:16:15	8315.03		8.17353	0
2022-07-26 00:16:20	9027		8.17353	0
2022-07-26 00:16:25	9512.34		8.17353	0
2022-07-26 00:16:30	10058.1		8.17353	0
2022-07-26 00:16:35	12390.6		8.17353	0
2022-07-26 00:16:40	14289.7		8.17353	0
2022-07-26 00:16:45	15106.9		8.17353	0
2022-07-26 00:16:50	16770.7		8.17353	0
2022-07-26 00:16:55	16746.9		8.17353	0
2022-07-26 00:17:00	16679.5		8.17353	0
2022-07-26 00:17:05	14975		8.17353	0
2022-07-26 00:17:10	13605.4		8.17353	0
2022-07-26 00:17:15	12749.7		8.17353	0
2022-07-26 00:17:20	9114.98		8.17353	0
2022-07-26 00:17:25	5877.76		8.17353	0
2022-07-26 00:17:30	7990.74		8.17353	0
2022-07-26 00:17:35	11232.5		8.17353	0
2022-07-26 00:17:40	14378.9		8.17353	0
2022-07-26 00:17:45	16341.5		8.17353	0
2022-07-26 00:17:50	17531.3		8.17353	0
2022-07-26 00:17:55	18283.4		8.17353	0
2022-07-26 00:18:00	19008.3		8.17353	0
2022-07-26 00:18:05	18132		8.17353	0
2022-07-26 00:18:10	15828.2		8.17353	0
2022-07-26 00:18:15	10622.4		8.17353	0
2022-07-26 00:18:20	9511.35		8.17353	0
2022-07-26 00:18:25	9931.66		8.17353	0
2022-07-26 00:18:30	9755.18		8.17353	0
2022-07-26 00:18:35	9839.63		8.17353	0
2022-07-26 00:18:40	11166.9		8.17353	0
2022-07-26 00:18:45	10467.6		8.17353	0
2022-07-26 00:18:50	10116.6		8.17353	0
2022-07-26 00:18:55	10764.5		8.17353	0
2022-07-26 00:19:00	8768.73		8.17353	0
2022-07-26 00:19:05	7019.47		8.17353	0
2022-07-26 00:19:10	5986.07		8.17353	0
2022-07-26 00:19:15	5736.6		8.17353	0
2022-07-26 00:19:20	5141.3		8.17353	0
2022-07-26 00:19:25	5020.4		8.17353	0
2022-07-26 00:19:30	5263.33		8.17353	0
2022-07-26 00:19:35	5148.65		8.17353	0
2022-07-26 00:19:40	6246.15		8.17353	0
2022-07-26 00:19:45	8463.16		8.17353	0
2022-07-26 00:19:50	10332.5		8.17353	0
2022-07-26 00:19:55	10175.5		8.17353	0
2022-07-26 00:20:00	8302.77		8.17353	0
2022-07-26 00:20:05	7394.16		8.17353	0
2022-07-26 00:20:10	7437.69		8.17353	0
2022-07-26 00:20:15	7472.49		8.17353	0
2022-07-26 00:20:20	7305.27		8.17353	0
2022-07-26 00:20:25	7111.47		8.17353	0
2022-07-26 00:20:30	5313.6		8.17353	0
2022-07-26 00:20:35	4704.69		8.17353	0
2022-07-26 00:20:40	6079.91		8.17353	0
2022-07-26 00:20:45	6678.3		8.17353	0
2022-07-26 00:20:50	6756.84		8.17353	0
2022-07-26 00:20:55	8114.97		8.17353	0
2022-07-26 00:21:00	7742.7		8.17353	0
2022-07-26 00:21:05	8492.82		8.17353	0
2022-07-26 00:21:10	7529.12		8.17353	0
2022-07-26 00:21:15	7204.51		8.17353	0
2022-07-26 00:21:20	8035.92		8.17353	0
2022-07-26 00:21:25	10554.6		8.17353	0
2022-07-26 00:21:30	11276.5		8.17353	0
2022-07-26 00:21:35	12903.7		8.17353	0
2022-07-26 00:21:40	15302.4		8.17353	0
2022-07-26 00:21:45	17064.8		8.17353	0
2022-07-26 00:21:50	16869.2		8.17353	0
2022-07-26 00:21:55	16124.1		8.17353	0
2022-07-26 00:22:00	13927.9		8.17353	0
2022-07-26 00:22:05	10027.8		8.17353	0
2022-07-26 00:22:10	7109.62		8.17353	0
2022-07-26 00:22:15	7514.98		8.17353	0
2022-07-26 00:22:20	7951.61		8.17353	0
2022-07-26 00:22:25	7889.14		8.17353	0
2022-07-26 00:22:30	8352.2		8.17353	0
2022-07-26 00:22:35	9508.61		8.17353	0
2022-07-26 00:22:40	9491.56		8.17353	0
2022-07-26 00:22:45	10952.6		8.17353	0
2022-07-26 00:22:50	12070.2		8.17353	0
2022-07-26 00:22:55	12570.7		8.17353	0
2022-07-26 00:23:00	13594		8.17353	0
2022-07-26 00:23:05	12225.6		8.17353	0
2022-07-26 00:23:10	10232.3		8.17353	0
2022-07-26 00:23:15	8224.17		8.17353	0
2022-07-26 00:23:20	9012.43		8.17353	0
2022-07-26 00:23:25	10168.3		8.17353	0
2022-07-26 00:23:30	7482.28		8.17353	0
2022-07-26 00:23:35	5746.46		8.17353	0
2022-07-26 00:23:40	5963.41		8.17353	0
2022-07-26 00:23:45	7294.53		8.17353	0
2022-07-26 00:23:50	7304.73		8.17353	0
2022-07-26 00:23:55	6821.82		8.17353	0
2022-07-26 00:24:00	5992.22		8.17353	0
2022-07-26 00:24:05	7098.97		8.17353	0
2022-07-26 00:24:10	8140.08		8.17353	0
2022-07-26 00:24:15	6709.26		8.17353	0
2022-07-26 00:24:20	5487.56		8.17353	0
2022-07-26 00:24:25	4395.67		8.17353	0
2022-07-26 00:24:30	4073.81		8.17353	0
2022-07-26 00:24:35	4069.94		8.17353	0
2022-07-26 00:24:40	3846.48		8.17353	0
2022-07-26 00:24:45	4195.14		8.17353	0
2022-07-26 00:24:50	5322.44		8.17353	0
2022-07-26 00:24:55	5942.74		8.17353	0
2022-07-26 00:25:00	6453.65		8.17353	0
2022-07-26 00:25:05	6596.53		8.17353	0
2022-07-26 00:25:10	6293.53		8.17353	0
2022-07-26 00:25:15	6975.79		8.17353	0
2022-07-26 00:25:20	8638.29		8.17353	0
2022-07-26 00:25:25	9551.18		8.17353	0
2022-07-26 00:25:30	9314.28		8.17353	0
2022-07-26 00:25:35	8710.03		8.17353	0
2022-07-26 00:25:40	7616.58		8.17353	0
2022-07-26 00:25:45	6247.79		8.17353	0
2022-07-26 00:25:50	5575.01		8.17353	0
2022-07-26 00:25:55	5234.32		8.17353	0
2022-07-26 00:26:00	5880.47		8.17353	0
2022-07-26 00:26:05	6452.13		8.17353	0
2022-07-26 00:26:10	7134.36		8.17353	0
2022-07-26 00:26:15	7988.18		8.17353	0
2022-07-26 00:26:20	8409.14		8.17353	0
2022-07-26 00:26:25	8027		8.17353	0
2022-07-26 00:26:30	7109		8.17353	0
2022-07-26 00:26:35	6733.17		8.17353	0
2022-07-26 00:26:40	6552.26		8.17353	0
2022-07-26 00:26:45	6089.92		8.17353	0
2022-07-26 00:26:50	5900.95		8.17353	0
2022-07-26 00:26:55	5262.38		8.17353	0
2022-07-26 00:27:00	6173.92		8.17353	0
2022-07-26 00:27:05	7246.41		8.17353	0
2022-07-26 00:27:10	6230.24		8.17353	0
2022-07-26 00:27:15	4848.72		8.17353	0
2022-07-26 00:27:20	4219.26		8.17353	0
2022-07-26 00:27:25	5862.11		8.17353	0
2022-07-26 00:27:30	6261.17		8.17353	0
2022-07-26 00:27:35	6932.45		8.17353	0
2022-07-26 00:27:40	6045.45		8.17353	0
2022-07-26 00:27:45	6423.19		8.17353	0
2022-07-26 00:27:50	6269.66		8.17353	0
2022-07-26 00:27:55	7003.88		8.17353	0
2022-07-26 00:28:00	7370.56		8.17353	0
2022-07-26 00:28:05	7686.54		8.17353	0
2022-07-26 00:28:10	6837.96		8.17353	0
2022-07-26 00:28:15	5208.93		8.17353	0
2022-07-26 00:28:20	4430.46		8.17353	0
2022-07-26 00:28:25	4030.33		8.17353	0
2022-07-26 00:28:30	3531.47		8.17353	0
2022-07-26 00:28:35	3971.1		8.17353	0
2022-07-26 00:28:40	4887.35		8.17353	0
2022-07-26 00:28:45	6419.81		8.17353	0
2022-07-26 00:28:50	6711.32		8.17353	0
2022-07-26 00:28:55	9052.14		8.17353	0
2022-07-26 00:29:00	11197.1		8.17353	0
2022-07-26 00:29:05	10411.4		8.17353	0
2022-07-26 00:29:10	11637.2		8.17353	0
2022-07-26 00:29:15	10384.7		8.17353	0
2022-07-26 00:29:20	10086.2		8.17353	0
2022-07-26 00:29:25	9239.26		8.17353	0
2022-07-26 00:29:30	11193		8.17353	0
2022-07-26 00:29:35	11914		8.17353	0
2022-07-26 00:29:40	11432.8		8.17353	0
2022-07-26 00:29:45	8977.67		8.17353	0
2022-07-26 00:30:00	4987.86		8.17353	0
2022-07-26 00:30:05	4949.54		8.17353	0
2022-07-26 00:30:10	4838.64		8.17353	0
2022-07-26 00:30:15	5425.64		8.17353	0
2022-07-26 00:30:20	6291.25		8.17353	0
2022-07-26 00:30:25	7883.56		8.17353	0
2022-07-26 00:30:30	7468.59		8.17353	0
2022-07-26 00:30:35	8054.55		8.17353	0
2022-07-26 00:30:40	8526.48		8.17353	0
2022-07-26 00:30:45	9202.14		8.17353	0
2022-07-26 00:30:50	9403.9		8.17353	0
2022-07-26 00:30:55	8423.51		8.17353	0
2022-07-26 00:31:00	8769.9		8.17353	0
2022-07-26 00:31:05	8881.06		8.17353	0
2022-07-26 00:31:10	8025.57		8.17353	0
2022-07-26 00:31:15	7489.79		8.17353	0
2022-07-26 00:31:20	6834.02		8.17353	0
2022-07-26 00:31:25	5273.98		8.17353	0
2022-07-26 00:31:30	3989.35		8.17353	0
2022-07-26 00:31:35	3603.39		8.17353	0
2022-07-26 00:31:40	3903.67		8.17353	0
2022-07-26 00:31:45	5938.07		8.17353	0
2022-07-26 00:31:50	8088.34		8.17353	0
2022-07-26 00:31:55	8456.23		8.17353	0
2022-07-26 00:32:00	7993.58		8.17353	0
2022-07-26 00:32:05	7423.92		8.17353	0
2022-07-26 00:32:10	7675.48		8.17353	0
2022-07-26 00:32:15	8334.29		8.17353	0
2022-07-26 00:32:20	6640.38		8.17353	0
2022-07-26 00:32:25	6112.39		8.17353	0
2022-07-26 00:32:30	6281.59		8.17353	0
2022-07-26 00:32:35	6316.25		8.17353	0
2022-07-26 00:32:40	6868.66		8.17353	0
2022-07-26 00:32:45	6924.72		8.17353	0
2022-07-26 00:32:50	6490.49		8.17353	0
2022-07-26 00:32:55	6231.73		8.17353	0
2022-07-26 00:33:00	5769.25		8.17353	0
2022-07-26 00:33:05	6180.58		8.17353	0
2022-07-26 00:33:10	7614.16		8.17353	0
2022-07-26 00:33:15	9577.28		8.17353	0
2022-07-26 00:33:20	9194.6		8.17353	0
2022-07-26 00:33:25	8988.56		8.17353	0
2022-07-26 00:33:30	8964.25		8.17353	0
2022-07-26 00:33:35	7918.99		8.17353	0
2022-07-26 00:33:40	8607.8		8.17353	0
2022-07-26 00:33:45	8588.09		8.17353	0
2022-07-26 00:33:50	8677.76		8.17353	0
2022-07-26 00:33:55	9883.17		8.17353	0
2022-07-26 00:34:00	13610.8		8.17353	0
2022-07-26 00:34:05	14782.9		8.17353	0
2022-07-26 00:34:10	14081.5		8.17353	0
2022-07-26 00:34:15	12016.1		8.17353	0
2022-07-26 00:34:20	10301		8.17353	0
2022-07-26 00:34:25	7945.01		8.17353	0
2022-07-26 00:34:30	4932.59		8.17353	0
2022-07-26 00:34:35	4936.83		8.17353	0
2022-07-26 00:34:40	6139.93		8.17353	0
2022-07-26 00:34:45	8315.12		8.17353	0
2022-07-26 00:34:50	7414.65		8.17353	0
2022-07-26 00:34:55	5529.89		8.17353	0
2022-07-26 00:35:00	5081.04		8.17353	0
2022-07-26 00:35:05	4653.4		8.17353	0
2022-07-26 00:35:10	4452.82		8.17353	0
2022-07-26 00:35:15	5188.33		8.17353	0
2022-07-26 00:35:20	5416.38		8.17353	0
2022-07-26 00:35:25	5933.45		8.17353	0
2022-07-26 00:35:30	7163.57		8.17353	0
2022-07-26 00:35:35	6869.27		8.17353	0
2022-07-26 00:35:40	8251.98		8.17353	0
2022-07-26 00:35:45	8961.3		8.17353	0
2022-07-26 00:35:50	8391.03		8.17353	0
2022-07-26 00:35:55	8221.12		8.17353	0
2022-07-26 00:36:00	8147.67		8.17353	0
2022-07-26 00:36:05	7521.57		8.17353	0
2022-07-26 00:36:10	8090.32		8.17353	0
2022-07-26 00:36:15	8200.49		8.17353	0
2022-07-26 00:36:20	6959.86		8.17353	0
2022-07-26 00:36:25	5170.47		8.17353	0
2022-07-26 00:36:30	4055.93		8.17353	0
2022-07-26 00:36:35	5178.15		8.17353	0
2022-07-26 00:36:40	6033.5		8.17353	0
2022-07-26 00:36:45	6107.17		8.17353	0
2022-07-26 00:36:50	5554.64		8.17353	0
2022-07-26 00:36:55	6401.65		8.17353	0
2022-07-26 00:37:00	6462.22		8.17353	0
2022-07-26 00:37:05	6968.82		8.17353	0
2022-07-26 00:37:10	7163.97		8.17353	0
2022-07-26 00:37:15	7547.47		8.17353	0
2022-07-26 00:37:20	7928.82		8.17353	0
2022-07-26 00:37:25	7852.72		8.17353	0
2022-07-26 00:37:30	7620.27		8.17353	0
2022-07-26 00:37:35	7238.05		8.17353	0
2022-07-26 00:37:40	6265.12		8.17353	0
2022-07-26 00:37:45	5811.12		8.17353	0
2022-07-26 00:37:50	6060.9		8.17353	0
2022-07-26 00:37:55	7814.08		8.17353	0
2022-07-26 00:38:00	8467.37		8.17353	0
2022-07-26 00:38:05	7666.04		8.17353	0
2022-07-26 00:38:10	8074.71		8.17353	0
2022-07-26 00:38:15	8942.39		8.17353	0
2022-07-26 00:38:20	9692.1		8.17353	0
2022-07-26 00:38:25	9663.38		8.17353	0
2022-07-26 00:38:30	8570.38		8.17353	0
2022-07-26 00:38:35	8709.34		8.17353	0
2022-07-26 00:38:40	9032.22		8.17353	0
2022-07-26 00:38:45	8806.33		8.17353	0
2022-07-26 00:38:50	8664.38		8.17353	0
2022-07-26 00:38:55	8845.71		8.17353	0
2022-07-26 00:39:00	10026		8.17353	0
2022-07-26 00:39:05	10142.1		8.17353	0
2022-07-26 00:39:10	12507.3		8.17353	0
2022-07-26 00:39:15	13382.7		8.17353	0
2022-07-26 00:39:20	12387.9		8.17353	0
2022-07-26 00:39:25	12226.6		8.17353	0
2022-07-26 00:39:30	12256.4		8.17353	0
2022-07-26 00:39:35	11529.2		8.17353	0
2022-07-26 00:39:40	10721.7		8.17353	0
2022-07-26 00:39:45	10830.7		8.17353	0
2022-07-26 00:39:50	11310.2		8.17353	0
2022-07-26 00:39:55	12061.4		8.17353	0
2022-07-26 00:40:00	11647.9		8.17353	0
2022-07-26 00:40:05	10618.1		8.17353	0
2022-07-26 00:40:10	9773.48		8.17353	0
2022-07-26 00:40:15	9774.05		8.17353	0
2022-07-26 00:40:20	9198.51		8.17353	0
2022-07-26 00:40:25	10372.1		8.17353	0
2022-07-26 00:40:30	10314.4		8.17353	0
2022-07-26 00:40:35	9424.38		8.17353	0
2022-07-26 00:40:40	8087.29		8.17353	0
2022-07-26 00:40:45	6730.72		8.17353	0
2022-07-26 00:40:50	6166.18		8.17353	0
2022-07-26 00:40:55	5438.86		8.17353	0
2022-07-26 00:41:00	4727.07		8.17353	0
2022-07-26 00:41:05	4653.77		8.17353	0
2022-07-26 00:41:10	5227.22		8.17353	0
2022-07-26 00:41:15	5343.31		8.17353	0
2022-07-26 00:41:20	5065.22		8.17353	0
2022-07-26 00:41:25	4727.16		8.17353	0
2022-07-26 00:41:30	4353.79		8.17353	0
2022-07-26 00:41:35	4234.46		8.17353	0
2022-07-26 00:41:40	3683.57		8.17353	0
2022-07-26 00:41:45	3159.67		8.17353	0
2022-07-26 00:41:50	3743.22		8.17353	0
2022-07-26 00:41:55	6230.13		8.17353	0
2022-07-26 00:42:00	10542.6		8.17353	0
2022-07-26 00:42:05	12161		8.17353	0
2022-07-26 00:42:10	12566.1		8.17353	0
2022-07-26 00:42:15	12265.9		8.17353	0
2022-07-26 00:42:20	13170		8.17353	0
2022-07-26 00:42:25	13926.6		8.17353	0
2022-07-26 00:42:30	13451.2		8.17353	0
2022-07-26 00:42:35	12045.1		8.17353	0
2022-07-26 00:42:40	10758.8		8.17353	0
2022-07-26 00:42:45	9091.5		8.17353	0
2022-07-26 00:42:50	7511.9		8.17353	0
2022-07-26 00:42:55	6611.49		8.17353	0
2022-07-26 00:43:00	7692.58		8.17353	0
2022-07-26 00:43:05	9543.98		8.17353	0
2022-07-26 00:43:10	11199.8		8.17353	0
2022-07-26 00:43:15	13104		8.17353	0
2022-07-26 00:43:20	14605.6		8.17353	0
2022-07-26 00:43:25	15719.6		8.17353	0
2022-07-26 00:43:30	15636.3		8.17353	0
2022-07-26 00:43:35	13944.5		8.17353	0
2022-07-26 00:43:40	12576		8.17353	0
2022-07-26 00:43:45	10777.3		8.17353	0
2022-07-26 00:43:50	9379.56		8.17353	0
2022-07-26 00:43:55	8967.24		8.17353	0
2022-07-26 00:44:00	9233.58		8.17353	0
2022-07-26 00:44:05	10356.1		8.17353	0
2022-07-26 00:44:10	10341.8		8.17353	0
2022-07-26 00:44:15	9972.32		8.17353	0
2022-07-26 00:44:20	8839.23		8.17353	0
2022-07-26 00:44:25	7375.6		8.17353	0
2022-07-26 00:44:30	7710.7		8.17353	0
2022-07-26 00:44:35	8653.11		8.17353	0
2022-07-26 00:44:40	9611.02		8.17353	0
2022-07-26 00:44:45	7794.16		8.17353	0
2022-07-26 00:44:50	7327.36		8.17353	0
2022-07-26 00:44:55	7647.99		8.17353	0
2022-07-26 00:45:00	8413.8		8.17353	0
2022-07-26 00:45:05	9773.21		8.17353	0
2022-07-26 00:45:10	11293.2		8.17353	0
2022-07-26 00:45:15	11639.5		8.17353	0
2022-07-26 00:45:20	12319.7		8.17353	0
2022-07-26 00:45:25	11784.4		8.17353	0
2022-07-26 00:45:30	11951.5		8.17353	0
2022-07-26 00:45:35	12896.5		8.17353	0
2022-07-26 00:45:40	12720.6		8.17353	0
2022-07-26 00:45:45	11780.7		8.17353	0
2022-07-26 00:45:50	10367.4		8.17353	0
2022-07-26 00:45:55	9095.99		8.17353	0
2022-07-26 00:46:00	8475.23		8.17353	0
2022-07-26 00:46:05	8191.5		8.17353	0
2022-07-26 00:46:10	7993.35		8.17353	0
2022-07-26 00:46:15	7043.08		8.17353	0
2022-07-26 00:46:20	7200.69		8.17353	0
2022-07-26 00:46:25	7762.56		8.17353	0
2022-07-26 00:46:30	9033.62		8.17353	0
2022-07-26 00:46:35	10027.9		8.17353	0
2022-07-26 00:46:40	10922.6		8.17353	0
2022-07-26 00:46:45	10296.9		8.17353	0
2022-07-26 00:46:50	10506.4		8.17353	0
2022-07-26 00:46:55	11166.2		8.17353	0
2022-07-26 00:47:00	11614.4		8.17353	0
2022-07-26 00:47:05	11801.2		8.17353	0
2022-07-26 00:47:10	10645.2		8.17353	0
2022-07-26 00:47:15	9914.53		8.17353	0
2022-07-26 00:47:20	9932.71		8.17353	0
2022-07-26 00:47:25	9656.96		8.17353	0
2022-07-26 00:47:30	10161.6		8.17353	0
2022-07-26 00:47:35	10727		8.17353	0
2022-07-26 00:47:40	12511		8.17353	0
2022-07-26 00:47:45	12719.1		8.17353	0
2022-07-26 00:47:50	13320.8		8.17353	0
2022-07-26 00:47:55	12444.4		8.17353	0
2022-07-26 00:48:00	11420.2		8.17353	0
2022-07-26 00:48:05	11114.7		8.17353	0
2022-07-26 00:48:10	11415		8.17353	0
2022-07-26 00:48:15	12400.3		8.17353	0
2022-07-26 00:48:20	12583		8.17353	0
2022-07-26 00:48:25	12677		8.17353	0
2022-07-26 00:48:30	12814.6		8.17353	0
2022-07-26 00:48:35	12427.1		8.17353	0
2022-07-26 00:48:40	12336.7		8.17353	0
2022-07-26 00:48:45	11361.4		8.17353	0
2022-07-26 00:48:50	9582.49		8.17353	0
2022-07-26 00:48:55	10583		8.17353	0
2022-07-26 00:49:00	10610.2		8.17353	0
2022-07-26 00:49:05	10417.8		8.17353	0
2022-07-26 00:49:10	12272.7		8.17353	0
2022-07-26 00:49:15	13363		8.17353	0
2022-07-26 00:49:20	13380.6		8.17353	0
2022-07-26 00:49:25	13500.5		8.17353	0
2022-07-26 00:49:30	14430.4		8.17353	0
2022-07-26 00:49:35	15035.4		8.17353	0
2022-07-26 00:49:40	15157.3		8.17353	0
2022-07-26 00:49:45	14595		8.17353	0
2022-07-26 00:49:50	13577.6		8.17353	0
2022-07-26 00:49:55	12415.4		8.17353	0
2022-07-26 00:50:00	11580.2		8.17353	0
2022-07-26 00:50:05	9728.64		8.17353	0
2022-07-26 00:50:10	8143.29		8.17353	0
2022-07-26 00:50:15	7706.65		8.17353	0
2022-07-26 00:50:20	7518.25		8.17353	0
2022-07-26 00:50:25	7587.63		8.17353	0
2022-07-26 00:50:30	6997.95		8.17353	0
2022-07-26 00:50:35	7081.63		8.17353	0
2022-07-26 00:50:40	7390.56		8.17353	0
2022-07-26 00:50:45	8086.56		8.17353	0
2022-07-26 00:50:50	8611.43		8.17353	0
2022-07-26 00:50:55	8163.75		8.17353	0
2022-07-26 00:51:00	8989.11		8.17353	0
2022-07-26 00:51:05	8597.66		8.17353	0
2022-07-26 00:51:10	8830.31		8.17353	0
2022-07-26 00:51:15	8638.49		8.17353	0
2022-07-26 00:51:20	9563.28		8.17353	0
2022-07-26 00:51:25	9720.03		8.17353	0
2022-07-26 00:51:30	9305.49		8.17353	0
2022-07-26 00:51:35	9731.58		8.17353	0
2022-07-26 00:51:40	10617.5		8.17353	0
2022-07-26 00:51:45	10173.1		8.17353	0
2022-07-26 00:51:50	9492.27		8.17353	0
2022-07-26 00:51:55	9409.45		8.17353	0
2022-07-26 00:52:00	9147.23		8.17353	0
2022-07-26 00:52:05	9524.85		8.17353	0
2022-07-26 00:52:10	9339.37		8.17353	0
2022-07-26 00:52:15	10477.2		8.17353	0
2022-07-26 00:52:20	11061.5		8.17353	0
2022-07-26 00:52:25	11730.4		8.17353	0
2022-07-26 00:52:30	11268.1		8.17353	0
2022-07-26 00:52:35	9927.2		8.17353	0
2022-07-26 00:52:40	9549.32		8.17353	0
2022-07-26 00:52:45	9362.41		8.17353	0
2022-07-26 00:52:50	8887.81		8.17353	0
2022-07-26 00:52:55	8050.24		8.17353	0
2022-07-26 00:53:00	8442.2		8.17353	0
2022-07-26 00:53:05	9175.46		8.17353	0
2022-07-26 00:53:10	11924.4		8.17353	0
2022-07-26 00:53:15	12948.9		8.17353	0
2022-07-26 00:53:20	12168.4		8.17353	0
2022-07-26 00:53:25	11676.1		8.17353	0
2022-07-26 00:53:30	11355.7		8.17353	0
2022-07-26 00:53:35	10865.9		8.17353	0
2022-07-26 00:53:40	9706.19		8.17353	0
2022-07-26 00:53:45	9194.38		8.17353	0
2022-07-26 00:53:50	10303.6		8.17353	0
2022-07-26 00:53:55	9408.97		8.17353	0
2022-07-26 00:54:00	10655.6		8.17353	0
2022-07-26 00:54:05	10994.2		8.17353	0
2022-07-26 00:54:10	11813		8.17353	0
2022-07-26 00:54:15	11773.9		8.17353	0
2022-07-26 00:54:20	13189.5		8.17353	0
2022-07-26 00:54:25	13492.8		8.17353	0
2022-07-26 00:54:30	13839.1		8.17353	0
2022-07-26 00:54:35	10985.2		8.17353	0
2022-07-26 00:54:40	8604.55		8.17353	0
2022-07-26 00:54:45	5818.74		8.17353	0
2022-07-26 00:54:50	3701.59		8.17353	0
2022-07-26 00:54:55	3640.62		8.17353	0
2022-07-26 00:55:00	3796.65		8.17353	0
2022-07-26 00:55:05	4404.26		8.17353	0
2022-07-26 00:55:10	4970.58		8.17353	0
2022-07-26 00:55:15	5800.15		8.17353	0
2022-07-26 00:55:20	6278.09		8.17353	0
2022-07-26 00:55:25	6461.05		8.17353	0
2022-07-26 00:55:30	6326.71		8.17353	0
2022-07-26 00:55:35	6436.66		8.17353	0
2022-07-26 00:55:40	6713.04		8.17353	0
2022-07-26 00:55:45	5731.2		8.17353	0
2022-07-26 00:55:50	4942.15		8.17353	0
2022-07-26 00:55:55	5854.54		8.17353	0
2022-07-26 00:56:00	8441.87		8.17353	0
2022-07-26 00:56:05	9941.4		8.17353	0
2022-07-26 00:56:10	9475.46		8.17353	0
2022-07-26 00:56:15	7820.42		8.17353	0
2022-07-26 00:56:20	7653.4		8.17353	0
2022-07-26 00:56:25	8370.59		8.17353	0
2022-07-26 00:56:30	9263.45		8.17353	0
2022-07-26 00:56:35	8072.45		8.17353	0
2022-07-26 00:56:40	6694.15		8.17353	0
2022-07-26 00:56:45	6251.56		8.17353	0
2022-07-26 00:56:50	5994.33		8.17353	0
2022-07-26 00:56:55	5940.71		8.17353	0
2022-07-26 00:57:00	5229.06		8.17353	0
2022-07-26 00:57:05	4938.9		8.17353	0
2022-07-26 00:57:10	4469.23		8.17353	0
2022-07-26 00:57:15	5294.66		8.17353	0
2022-07-26 00:57:20	6093.74		8.17353	0
2022-07-26 00:57:25	6118.65		8.17353	0
2022-07-26 00:57:30	6307.8		8.17353	0
2022-07-26 00:57:35	6204.93		8.17353	0
2022-07-26 00:57:40	5511.84		8.17353	0
2022-07-26 00:57:45	5059.98		8.17353	0
2022-07-26 00:57:50	5504.18		8.17353	0
2022-07-26 00:57:55	6308.35		8.17353	0
2022-07-26 00:58:00	6907.12		8.17353	0
2022-07-26 00:58:05	7982		8.17353	0
2022-07-26 00:58:10	9333.94		8.17353	0
2022-07-26 00:58:15	9801.11		8.17353	0
2022-07-26 00:58:20	9980.48		8.17353	0
2022-07-26 00:58:25	10228.2		8.17353	0
2022-07-26 00:58:30	9992.47		8.17353	0
2022-07-26 00:58:35	8848.77		8.17353	0
2022-07-26 00:58:40	8875.64		8.17353	0
2022-07-26 00:58:45	10643.2		8.17353	0
2022-07-26 00:58:50	12600.7		8.17353	0
2022-07-26 00:58:55	12498.4		8.17353	0
2022-07-26 00:59:00	10666.2		8.17353	0
2022-07-26 00:59:05	9701.37		8.17353	0
2022-07-26 00:59:10	7723.88		8.17353	0
2022-07-26 00:59:15	6493.07		8.17353	0
2022-07-26 00:59:20	6688.69		8.17353	0
2022-07-26 00:59:25	6086.18		8.17353	0
2022-07-26 00:59:30	5864.62		8.17353	0
2022-07-26 00:59:35	5914.22		8.17353	0
2022-07-26 00:59:40	6180.69		8.17353	0
2022-07-26 00:59:45	5595.76		8.17353	0
2022-07-26 00:59:50	5912.01		8.17353	0
2022-07-26 00:59:55	5889.04		8.17353	0
2022-07-26 01:00:05	7731.71		7.51081	0
2022-07-26 01:00:10	8731.02		7.51081	0
2022-07-26 01:00:15	10083.8		7.51081	0
2022-07-26 01:00:20	11382.6		7.51081	0
2022-07-26 01:00:25	12555		7.51081	0
2022-07-26 01:00:30	12137.7		7.51081	0
2022-07-26 01:00:35	11358.1		7.51081	0
2022-07-26 01:00:40	9836.37		7.51081	0
2022-07-26 01:00:45	8653.33		7.51081	0
2022-07-26 01:00:50	7689.47		7.51081	0
2022-07-26 01:00:55	6678.38		7.51081	0
2022-07-26 01:01:00	7158.55		7.51081	0
2022-07-26 01:01:05	8084.76		7.51081	0
2022-07-26 01:01:10	8106.97		7.51081	0
2022-07-26 01:01:15	6690.04		7.51081	0
2022-07-26 01:01:20	6388.83		7.51081	0
2022-07-26 01:01:25	6701.85		7.51081	0
2022-07-26 01:01:30	7625.8		7.51081	0
2022-07-26 01:01:35	8960.13		7.51081	0
2022-07-26 01:01:40	7780.41		7.51081	0
2022-07-26 01:01:45	6334.34		7.51081	0
2022-07-26 01:01:50	5309.71		7.51081	0
2022-07-26 01:01:55	4250.74		7.51081	0
2022-07-26 01:02:00	5146.62		7.51081	0
2022-07-26 01:02:05	7167.2		7.51081	0
2022-07-26 01:02:10	8778.53		7.51081	0
2022-07-26 01:02:15	8957.16		7.51081	0
2022-07-26 01:02:20	7743.94		7.51081	0
2022-07-26 01:02:25	7851.48		7.51081	0
2022-07-26 01:02:30	6896.32		7.51081	0
2022-07-26 01:02:35	5326.69		7.51081	0
2022-07-26 01:02:40	4826.26		7.51081	0
2022-07-26 01:02:45	4748.88		7.51081	0
2022-07-26 01:02:50	5319.46		7.51081	0
2022-07-26 01:02:55	5736.5		7.51081	0
2022-07-26 01:03:00	5391.81		7.51081	0
2022-07-26 01:03:05	5510.56		7.51081	0
2022-07-26 01:03:10	7428.6		7.51081	0
2022-07-26 01:03:15	8996.4		7.51081	0
2022-07-26 01:03:20	10361.8		7.51081	0
2022-07-26 01:03:25	11527.8		7.51081	0
2022-07-26 01:03:30	12129.3		7.51081	0
2022-07-26 01:03:35	11245.4		7.51081	0
2022-07-26 01:03:40	11400.8		7.51081	0
2022-07-26 01:03:45	11511.8		7.51081	0
2022-07-26 01:03:50	11786.4		7.51081	0
2022-07-26 01:03:55	12791.5		7.51081	0
2022-07-26 01:04:00	13347.4		7.51081	0
2022-07-26 01:04:05	13834.8		7.51081	0
2022-07-26 01:04:10	14242.3		7.51081	0
2022-07-26 01:04:15	15177.9		7.51081	0
2022-07-26 01:04:20	15483.1		7.51081	0
2022-07-26 01:04:25	15201.7		7.51081	0
2022-07-26 01:04:30	14299.9		7.51081	0
2022-07-26 01:04:35	15016.9		7.51081	0
2022-07-26 01:04:40	15172.4		7.51081	0
2022-07-26 01:04:45	14717.5		7.51081	0
2022-07-26 01:04:50	12002.7		7.51081	0
2022-07-26 01:04:55	9232.58		7.51081	0
2022-07-26 01:05:00	6635.55		7.51081	0
2022-07-26 01:05:05	5419.08		7.51081	0
2022-07-26 01:05:10	5906.18		7.51081	0
2022-07-26 01:05:15	6578.86		7.51081	0
2022-07-26 01:05:20	8199.44		7.51081	0
2022-07-26 01:05:25	8679.83		7.51081	0
2022-07-26 01:05:30	9163.91		7.51081	0
2022-07-26 01:05:35	7925.97		7.51081	0
2022-07-26 01:05:40	6307.89		7.51081	0
2022-07-26 01:05:45	6666.8		7.51081	0
2022-07-26 01:05:50	7347.16		7.51081	0
2022-07-26 01:05:55	7237.01		7.51081	0
2022-07-26 01:06:00	7344.27		7.51081	0
2022-07-26 01:06:05	7231.75		7.51081	0
2022-07-26 01:06:10	7583.96		7.51081	0
2022-07-26 01:06:15	7275.85		7.51081	0
2022-07-26 01:06:20	7511.62		7.51081	0
2022-07-26 01:06:25	7512.6		7.51081	0
2022-07-26 01:06:30	7512.7		7.51081	0
2022-07-26 01:06:35	6093.28		7.51081	0
2022-07-26 01:06:40	5078.34		7.51081	0
2022-07-26 01:06:45	5725.98		7.51081	0
2022-07-26 01:06:50	6216.69		7.51081	0
2022-07-26 01:06:55	6022.59		7.51081	0
2022-07-26 01:07:00	5337.48		7.51081	0
2022-07-26 01:07:05	6098.99		7.51081	0
2022-07-26 01:07:10	6784.88		7.51081	0
2022-07-26 01:07:15	6676.11		7.51081	0
2022-07-26 01:07:20	6607.6		7.51081	0
2022-07-26 01:07:25	7407.41		7.51081	0
2022-07-26 01:07:30	7636.44		7.51081	0
2022-07-26 01:07:35	7326.57		7.51081	0
2022-07-26 01:07:40	6024.65		7.51081	0
2022-07-26 01:07:45	5533.15		7.51081	0
2022-07-26 01:07:50	5251.73		7.51081	0
2022-07-26 01:07:55	5459.59		7.51081	0
2022-07-26 01:08:00	5326.72		7.51081	0
2022-07-26 01:08:05	6311.99		7.51081	0
2022-07-26 01:08:10	5619.06		7.51081	0
2022-07-26 01:08:15	5262.85		7.51081	0
2022-07-26 01:08:20	4559.17		7.51081	0
2022-07-26 01:08:25	4199.79		7.51081	0
2022-07-26 01:08:30	3869.04		7.51081	0
2022-07-26 01:08:35	4110.28		7.51081	0
2022-07-26 01:08:40	4936.68		7.51081	0
2022-07-26 01:08:45	5823.76		7.51081	0
2022-07-26 01:08:50	6521.95		7.51081	0
2022-07-26 01:08:55	6252.38		7.51081	0
2022-07-26 01:09:00	5825.36		7.51081	0
2022-07-26 01:09:05	4808.79		7.51081	0
2022-07-26 01:09:10	3922.63		7.51081	0
2022-07-26 01:09:15	3881.45		7.51081	0
2022-07-26 01:09:20	4768.84		7.51081	0
2022-07-26 01:09:25	5734.06		7.51081	0
2022-07-26 01:09:30	5855.3		7.51081	0
2022-07-26 01:09:35	6425.34		7.51081	0
2022-07-26 01:09:40	7020.49		7.51081	0
2022-07-26 01:09:45	7284.95		7.51081	0
2022-07-26 01:09:50	7260.48		7.51081	0
2022-07-26 01:09:55	6512.64		7.51081	0
2022-07-26 01:10:00	6108.44		7.51081	0
2022-07-26 01:10:05	3105.95		7.51081	0
2022-07-26 01:10:10	5129.01		7.51081	0
2022-07-26 01:10:15	5454.57		7.51081	0
2022-07-26 01:10:20	6091.8		7.51081	0
2022-07-26 01:10:25	6289.96		7.51081	0
2022-07-26 01:10:30	7339.34		7.51081	0
2022-07-26 01:10:35	8813.04		7.51081	0
2022-07-26 01:10:40	8921.33		7.51081	0
2022-07-26 01:10:45	8138.53		7.51081	0
2022-07-26 01:10:50	6975.42		7.51081	0
2022-07-26 01:10:55	5063.4		7.51081	0
2022-07-26 01:11:00	3744.24		7.51081	0
2022-07-26 01:11:05	2470.63		7.51081	0
2022-07-26 01:11:10	2397.19		7.51081	0
2022-07-26 01:11:15	2256.23		7.51081	0
2022-07-26 01:11:20	1840.2		7.51081	0
2022-07-26 01:11:25	1949.31		7.51081	0
2022-07-26 01:11:30	2604.16		7.51081	0
2022-07-26 01:11:35	3449.14		7.51081	0
2022-07-26 01:11:40	3936.49		7.51081	0
2022-07-26 01:11:45	4523.43		7.51081	0
2022-07-26 01:11:50	4832.33		7.51081	0
2022-07-26 01:11:55	5390.29		7.51081	0
2022-07-26 01:12:00	5305.81		7.51081	0
2022-07-26 01:12:05	5145.32		7.51081	0
2022-07-26 01:12:10	5563.99		7.51081	0
2022-07-26 01:12:15	7136.42		7.51081	0
2022-07-26 01:12:20	7913.74		7.51081	0
2022-07-26 01:12:25	9681.56		7.51081	0
2022-07-26 01:12:30	11587.8		7.51081	0
2022-07-26 01:12:35	12011.7		7.51081	0
2022-07-26 01:12:40	12665.4		7.51081	0
2022-07-26 01:12:45	13078.1		7.51081	0
2022-07-26 01:12:50	12567.8		7.51081	0
2022-07-26 01:12:55	12454.2		7.51081	0
2022-07-26 01:13:00	12096.7		7.51081	0
2022-07-26 01:13:05	10506.5		7.51081	0
2022-07-26 01:13:10	8110.44		7.51081	0
2022-07-26 01:13:15	7116.99		7.51081	0
2022-07-26 01:13:20	7374.19		7.51081	0
2022-07-26 01:13:25	7685.89		7.51081	0
2022-07-26 01:13:30	7867.93		7.51081	0
2022-07-26 01:13:35	8826.98		7.51081	0
2022-07-26 01:13:40	9921		7.51081	0
2022-07-26 01:13:45	9731.03		7.51081	0
2022-07-26 01:13:50	9243.43		7.51081	0
2022-07-26 01:13:55	8995.36		7.51081	0
2022-07-26 01:14:00	8822.39		7.51081	0
2022-07-26 01:14:05	8043.35		7.51081	0
2022-07-26 01:14:10	6752.06		7.51081	0
2022-07-26 01:14:15	5312.06		7.51081	0
2022-07-26 01:14:20	5361.05		7.51081	0
2022-07-26 01:14:25	4992.38		7.51081	0
2022-07-26 01:14:30	3888.58		7.51081	0
2022-07-26 01:14:35	3349.42		7.51081	0
2022-07-26 01:14:40	3816.72		7.51081	0
2022-07-26 01:14:45	4457.59		7.51081	0
2022-07-26 01:14:50	5221.49		7.51081	0
2022-07-26 01:14:55	5784.67		7.51081	0
2022-07-26 01:15:00	5197.93		7.51081	0
2022-07-26 01:15:05	4828.71		7.51081	0
2022-07-26 01:15:10	6157.84		7.51081	0
2022-07-26 01:15:15	7311.12		7.51081	0
2022-07-26 01:15:20	10333.2		7.51081	0
2022-07-26 01:15:25	13205.5		7.51081	0
2022-07-26 01:15:30	13327.4		7.51081	0
2022-07-26 01:15:35	13514.3		7.51081	0
2022-07-26 01:15:40	12980.8		7.51081	0
2022-07-26 01:15:45	10342.7		7.51081	0
2022-07-26 01:15:50	8033.77		7.51081	0
2022-07-26 01:15:55	7323.88		7.51081	0
2022-07-26 01:16:00	7161.83		7.51081	0
2022-07-26 01:16:05	6650.42		7.51081	0
2022-07-26 01:16:10	6946.41		7.51081	0
2022-07-26 01:16:15	6036.18		7.51081	0
2022-07-26 01:16:20	6190.31		7.51081	0
2022-07-26 01:16:25	6533.36		7.51081	0
2022-07-26 01:16:30	7133.76		7.51081	0
2022-07-26 01:16:35	6712.27		7.51081	0
2022-07-26 01:16:40	6124.29		7.51081	0
2022-07-26 01:16:45	6466.64		7.51081	0
2022-07-26 01:16:50	7755.29		7.51081	0
2022-07-26 01:16:55	8038.67		7.51081	0
2022-07-26 01:17:00	7079.23		7.51081	0
2022-07-26 01:17:05	5743.39		7.51081	0
2022-07-26 01:17:10	5976.74		7.51081	0
2022-07-26 01:17:15	4637.77		7.51081	0
2022-07-26 01:17:20	3177.84		7.51081	0
2022-07-26 01:17:25	2854.15		7.51081	0
2022-07-26 01:17:30	2478.12		7.51081	0
2022-07-26 01:17:35	2519.32		7.51081	0
2022-07-26 01:17:40	2943.98		7.51081	0
2022-07-26 01:17:45	3163.16		7.51081	0
2022-07-26 01:17:50	3124.16		7.51081	0
2022-07-26 01:17:55	3145.22		7.51081	0
2022-07-26 01:18:00	3185.63		7.51081	0
2022-07-26 01:18:05	4134.4		7.51081	0
2022-07-26 01:18:10	5961.4		7.51081	0
2022-07-26 01:18:15	8024.54		7.51081	0
2022-07-26 01:18:20	8423.27		7.51081	0
2022-07-26 01:18:25	7380.86		7.51081	0
2022-07-26 01:18:30	6520.34		7.51081	0
2022-07-26 01:18:35	7031.15		7.51081	0
2022-07-26 01:18:40	6848.94		7.51081	0
[truncated: 495 more rows]

## Sheet: Light dilution not corrected
Date/Time [BST, UTC+1]	_phi [g/s]	_phi_err	_velo_eff	_velo_eff_err	_frac_optflow_ok	_frac_optflow_ok_ica
2022-07-25 21:01:05	3553.72		7.7568	0
2022-07-25 21:01:10	3001.65		7.7568	0
2022-07-25 21:01:15	3098.81		7.7568	0
2022-07-25 21:01:20	3055.6		7.7568	0
2022-07-25 21:01:25	3082.93		7.7568	0
2022-07-25 21:01:30	2734.35		7.7568	0
2022-07-25 21:01:35	2556.2		7.7568	0
2022-07-25 21:01:40	3071.73		7.7568	0
2022-07-25 21:01:45	3579.7		7.7568	0
2022-07-25 21:01:50	4622.22		7.7568	0
2022-07-25 21:01:55	5595.48		7.7568	0
2022-07-25 21:02:00	6493.92		7.7568	0
2022-07-25 21:02:05	7388.3		7.7568	0
2022-07-25 21:02:10	8242.7		7.7568	0
2022-07-25 21:02:15	10269		7.7568	0
2022-07-25 21:02:20	11164.4		7.7568	0
2022-07-25 21:02:25	11518.9		7.7568	0
2022-07-25 21:02:30	10662.6		7.7568	0
2022-07-25 21:02:35	9270.53		7.7568	0
2022-07-25 21:02:40	9041.24		7.7568	0
2022-07-25 21:02:45	10029.1		7.7568	0
2022-07-25 21:02:50	9962.45		7.7568	0
2022-07-25 21:02:55	10156.3		7.7568	0
2022-07-25 21:03:00	10988.1		7.7568	0
2022-07-25 21:03:05	9897.03		7.7568	0
2022-07-25 21:03:10	8675.16		7.7568	0
2022-07-25 21:03:15	6489.86		7.7568	0
2022-07-25 21:03:20	4847.15		7.7568	0
2022-07-25 21:03:25	2864.89		7.7568	0
2022-07-25 21:03:30	1613.29		7.7568	0
2022-07-25 21:03:35	1524.59		7.7568	0
2022-07-25 21:03:40	1933.96		7.7568	0
2022-07-25 21:03:45	3069.1		7.7568	0
2022-07-25 21:03:50	3863.25		7.7568	0
2022-07-25 21:03:55	3991.08		7.7568	0
2022-07-25 21:04:00	5180.95		7.7568	0
2022-07-25 21:04:05	3735.19		7.7568	0
2022-07-25 21:04:10	3792.12		7.7568	0
2022-07-25 21:04:15	4400.31		7.7568	0
2022-07-25 21:04:20	5748.5		7.7568	0
2022-07-25 21:04:25	7501.54		7.7568	0
2022-07-25 21:04:30	8116.55		7.7568	0
2022-07-25 21:04:35	9577.85		7.7568	0
2022-07-25 21:04:40	9959.85		7.7568	0
2022-07-25 21:04:45	9481.29		7.7568	0
2022-07-25 21:04:50	8657.91		7.7568	0
2022-07-25 21:04:55	8711.73		7.7568	0
2022-07-25 21:05:00	8353.65		7.7568	0
2022-07-25 21:05:05	7792.29		7.7568	0
2022-07-25 21:05:10	7117.21		7.7568	0
2022-07-25 21:05:15	5942.78		7.7568	0
2022-07-25 21:05:20	5542.23		7.7568	0
2022-07-25 21:05:25	5734.37		7.7568	0
2022-07-25 21:05:30	5927.56		7.7568	0
2022-07-25 21:05:35	6324.64		7.7568	0
2022-07-25 21:05:40	6893.84		7.7568	0
2022-07-25 21:05:45	7101.11		7.7568	0
2022-07-25 21:05:50	6641.74		7.7568	0
2022-07-25 21:05:55	5237.74		7.7568	0
2022-07-25 21:06:00	3737.75		7.7568	0
2022-07-25 21:06:05	3288.87		7.7568	0
2022-07-25 21:06:10	3113.65		7.7568	0
2022-07-25 21:06:15	3239.96		7.7568	0
2022-07-25 21:06:20	3345.41		7.7568	0
2022-07-25 21:06:25	4159.18		7.7568	0
2022-07-25 21:06:30	4747.85		7.7568	0
2022-07-25 21:06:35	5076.57		7.7568	0
2022-07-25 21:06:40	5679.4		7.7568	0
2022-07-25 21:06:45	5345.57		7.7568	0
2022-07-25 21:06:50	4760.91		7.7568	0
2022-07-25 21:06:55	4794.17		7.7568	0
2022-07-25 21:07:00	4839.44		7.7568	0
2022-07-25 21:07:05	4287.91		7.7568	0
2022-07-25 21:07:10	4614.5		7.7568	0
2022-07-25 21:07:15	4847.94		7.7568	0
2022-07-25 21:07:20	5079.55		7.7568	0
2022-07-25 21:07:25	5240.49		7.7568	0
2022-07-25 21:07:30	5031.92		7.7568	0
2022-07-25 21:07:35	4317.31		7.7568	0
2022-07-25 21:07:40	3881.81		7.7568	0
2022-07-25 21:07:45	2975.28		7.7568	0
2022-07-25 21:07:50	2370.81		7.7568	0
2022-07-25 21:07:55	2628.45		7.7568	0
2022-07-25 21:08:00	3015.11		7.7568	0
2022-07-25 21:08:05	3801.82		7.7568	0
2022-07-25 21:08:10	4661.91		7.7568	0
2022-07-25 21:08:15	4492.34		7.7568	0
2022-07-25 21:08:20	4764.33		7.7568	0
2022-07-25 21:08:25	4905.19		7.7568	0
2022-07-25 21:08:30	5137.85		7.7568	0
2022-07-25 21:08:35	5421.99		7.7568	0
2022-07-25 21:08:40	4933.9		7.7568	0
2022-07-25 21:08:45	4984.08		7.7568	0
2022-07-25 21:08:50	5299.09		7.7568	0
2022-07-25 21:08:55	5143.38		7.7568	0
2022-07-25 21:09:00	5655.9		7.7568	0
2022-07-25 21:09:05	5899.77		7.7568	0
2022-07-25 21:09:10	5892.09		7.7568	0
2022-07-25 21:09:15	6281.18		7.7568	0
2022-07-25 21:09:20	6156.22		7.7568	0
2022-07-25 21:09:25	5830.23		7.7568	0
2022-07-25 21:09:30	5820.17		7.7568	0
2022-07-25 21:09:35	6091.95		7.7568	0
2022-07-25 21:09:40	5899.75		7.7568	0
2022-07-25 21:09:45	5703.27		7.7568	0
2022-07-25 21:09:50	5613.27		7.7568	0
2022-07-25 21:09:55	5487.17		7.7568	0
2022-07-25 21:10:00	5058.45		7.7568	0
2022-07-25 21:10:05	5265.21		7.7568	0
2022-07-25 21:10:10	4681.27		7.7568	0
2022-07-25 21:10:15	4910.17		7.7568	0
2022-07-25 21:10:20	5356.36		7.7568	0
2022-07-25 21:10:25	6432.69		7.7568	0
2022-07-25 21:10:30	6903.63		7.7568	0
2022-07-25 21:10:35	7654.25		7.7568	0
2022-07-25 21:10:40	7245.99		7.7568	0
2022-07-25 21:10:45	6765.64		7.7568	0
2022-07-25 21:10:50	6461.74		7.7568	0
2022-07-25 21:10:55	5102.5		7.7568	0
2022-07-25 21:11:00	4678.69		7.7568	0
2022-07-25 21:11:05	4024.6		7.7568	0
2022-07-25 21:11:10	3451.97		7.7568	0
2022-07-25 21:11:15	3457.11		7.7568	0
2022-07-25 21:11:20	3339.4		7.7568	0
2022-07-25 21:11:25	3236.06		7.7568	0
2022-07-25 21:11:30	3428.87		7.7568	0
2022-07-25 21:11:35	4293.99		7.7568	0
2022-07-25 21:11:40	5546.31		7.7568	0
2022-07-25 21:11:45	6030.21		7.7568	0
2022-07-25 21:11:50	6095.74		7.7568	0
2022-07-25 21:11:55	6180.38		7.7568	0
2022-07-25 21:12:00	5883.06		7.7568	0
2022-07-25 21:12:05	5701.17		7.7568	0
2022-07-25 21:12:10	5702.33		7.7568	0
2022-07-25 21:12:15	5738.17		7.7568	0
2022-07-25 21:12:20	5215.55		7.7568	0
2022-07-25 21:12:25	3661.26		7.7568	0
2022-07-25 21:12:30	2450.75		7.7568	0
2022-07-25 21:12:35	1799.75		7.7568	0
2022-07-25 21:12:40	2222.79		7.7568	0
2022-07-25 21:12:45	2584.02		7.7568	0
2022-07-25 21:12:50	2467.41		7.7568	0
2022-07-25 21:12:55	2599.04		7.7568	0
2022-07-25 21:13:00	2567.12		7.7568	0
2022-07-25 21:13:05	2138.71		7.7568	0
2022-07-25 21:13:10	1530.95		7.7568	0
2022-07-25 21:13:15	1252.07		7.7568	0
2022-07-25 21:13:20	1513.49		7.7568	0
2022-07-25 21:13:25	1140.99		7.7568	0
2022-07-25 21:13:30	1155.51		7.7568	0
2022-07-25 21:13:35	1517.68		7.7568	0
2022-07-25 21:13:40	1788.11		7.7568	0
2022-07-25 21:13:45	1504.62		7.7568	0
2022-07-25 21:13:50	1295.21		7.7568	0
2022-07-25 21:13:55	1475.58		7.7568	0
2022-07-25 21:14:00	1626.04		7.7568	0
2022-07-25 21:14:05	1437.23		7.7568	0
2022-07-25 21:14:10	1975.73		7.7568	0
2022-07-25 21:14:15	1939.8		7.7568	0
2022-07-25 21:14:20	2294.23		7.7568	0
2022-07-25 21:14:25	2295.05		7.7568	0
2022-07-25 21:14:30	1877.99		7.7568	0
2022-07-25 21:14:35	2225.77		7.7568	0
2022-07-25 21:14:40	3275.5		7.7568	0
2022-07-25 21:14:45	3874.95		7.7568	0
2022-07-25 21:14:50	3332.82		7.7568	0
2022-07-25 21:14:55	3982.05		7.7568	0
2022-07-25 21:15:00	3811.3		7.7568	0
2022-07-25 21:15:05	5387.27		7.7568	0
2022-07-25 21:15:10	4741.4		7.7568	0
2022-07-25 21:15:15	4377.31		7.7568	0
2022-07-25 21:15:20	4224		7.7568	0
2022-07-25 21:15:25	6451.61		7.7568	0
2022-07-25 21:15:30	7524.49		7.7568	0
2022-07-25 21:15:35	7679.44		7.7568	0
2022-07-25 21:15:40	7822.93		7.7568	0
2022-07-25 21:15:45	8035.59		7.7568	0
2022-07-25 21:15:50	8152.83		7.7568	0
2022-07-25 21:15:55	8356.18		7.7568	0
2022-07-25 21:16:00	8659.95		7.7568	0
2022-07-25 21:16:05	8806.38		7.7568	0
2022-07-25 21:16:10	8930.16		7.7568	0
2022-07-25 21:16:15	8618.4		7.7568	0
2022-07-25 21:16:20	8550.19		7.7568	0
2022-07-25 21:16:25	7717.06		7.7568	0
2022-07-25 21:16:30	8341.31		7.7568	0
2022-07-25 21:16:35	9158.86		7.7568	0
2022-07-25 21:16:40	8765.33		7.7568	0
2022-07-25 21:16:45	8049.62		7.7568	0
2022-07-25 21:16:50	8470.69		7.7568	0
2022-07-25 21:16:55	8452.48		7.7568	0
2022-07-25 21:17:00	8721.54		7.7568	0
2022-07-25 21:17:05	8702.21		7.7568	0
2022-07-25 21:17:10	8470		7.7568	0
2022-07-25 21:17:15	8163.46		7.7568	0
2022-07-25 21:17:20	7933.88		7.7568	0
2022-07-25 21:17:25	7613.21		7.7568	0
2022-07-25 21:17:30	8002.74		7.7568	0
2022-07-25 21:17:35	7682.48		7.7568	0
2022-07-25 21:17:40	6522.32		7.7568	0
2022-07-25 21:17:45	5928.99		7.7568	0
2022-07-25 21:17:50	6382.83		7.7568	0
2022-07-25 21:17:55	6514.85		7.7568	0
2022-07-25 21:18:00	6227.69		7.7568	0
2022-07-25 21:18:05	6116.61		7.7568	0
2022-07-25 21:18:10	5995.43		7.7568	0
2022-07-25 21:18:15	5910.45		7.7568	0
2022-07-25 21:18:20	6198.95		7.7568	0
2022-07-25 21:18:25	6311.02		7.7568	0
2022-07-25 21:18:30	6383.36		7.7568	0
2022-07-25 21:18:35	7057.68		7.7568	0
2022-07-25 21:18:40	7940.61		7.7568	0
2022-07-25 21:18:45	7995.45		7.7568	0
2022-07-25 21:18:50	7690.72		7.7568	0
2022-07-25 21:18:55	8388.98		7.7568	0
2022-07-25 21:19:00	7952.21		7.7568	0
2022-07-25 21:19:05	7834.96		7.7568	0
2022-07-25 21:19:10	7429.01		7.7568	0
2022-07-25 21:19:15	6852.95		7.7568	0
2022-07-25 21:19:20	6728.69		7.7568	0
2022-07-25 21:19:25	6166.16		7.7568	0
2022-07-25 21:19:30	5394.67		7.7568	0
2022-07-25 21:19:35	5228.44		7.7568	0
2022-07-25 21:19:40	4567.61		7.7568	0
2022-07-25 21:19:45	4674.36		7.7568	0
2022-07-25 21:19:50	4175.57		7.7568	0
2022-07-25 21:19:55	4158.7		7.7568	0
2022-07-25 21:20:00	4191.57		7.7568	0
2022-07-25 21:20:05	4265.47		7.7568	0
2022-07-25 21:20:10	4631.15		7.7568	0
2022-07-25 21:20:15	4848.66		7.7568	0
2022-07-25 21:20:20	5236.2		7.7568	0
2022-07-25 21:20:25	5290.98		7.7568	0
2022-07-25 21:20:30	5554.29		7.7568	0
2022-07-25 21:20:35	5552.85		7.7568	0
2022-07-25 21:20:40	5204.05		7.7568	0
2022-07-25 21:20:45	4455.56		7.7568	0
2022-07-25 21:20:50	4091.49		7.7568	0
2022-07-25 21:20:55	4262.21		7.7568	0
2022-07-25 21:21:00	4261.57		7.7568	0
2022-07-25 21:21:05	3786.07		7.7568	0
2022-07-25 21:21:10	3812.81		7.7568	0
2022-07-25 21:21:15	3659.88		7.7568	0
2022-07-25 21:21:20	3479.04		7.7568	0
2022-07-25 21:21:25	3699.77		7.7568	0
2022-07-25 21:21:30	3599.41		7.7568	0
2022-07-25 21:21:35	4362.63		7.7568	0
2022-07-25 21:21:40	5154.83		7.7568	0
2022-07-25 21:21:45	5139.97		7.7568	0
2022-07-25 21:21:50	5860.82		7.7568	0
2022-07-25 21:21:55	6007.09		7.7568	0
2022-07-25 21:22:00	5550.21		7.7568	0
2022-07-25 21:22:05	5437.3		7.7568	0
2022-07-25 21:22:10	5214.88		7.7568	0
2022-07-25 21:22:15	5190.56		7.7568	0
2022-07-25 21:22:20	5329.02		7.7568	0
2022-07-25 21:22:25	4756.52		7.7568	0
2022-07-25 21:22:30	3132.7		7.7568	0
2022-07-25 21:22:35	1837.26		7.7568	0
2022-07-25 21:22:40	682.301		7.7568	0
2022-07-25 21:22:45	19.0725		7.7568	0
2022-07-25 21:22:50	2633.69		7.7568	0
2022-07-25 21:22:55	3041.02		7.7568	0
2022-07-25 21:23:00	2453.15		7.7568	0
2022-07-25 21:23:05	1859.96		7.7568	0
2022-07-25 21:23:10	1307.88		7.7568	0
2022-07-25 21:23:15	699.632		7.7568	0
2022-07-25 21:23:20	2442.21		7.7568	0
2022-07-25 21:23:25	3085.5		7.7568	0
2022-07-25 21:23:30	3883.07		7.7568	0
2022-07-25 21:23:35	3979.25		7.7568	0
2022-07-25 21:23:40	3642.02		7.7568	0
2022-07-25 21:23:45	3995.15		7.7568	0
2022-07-25 21:23:50	3780.64		7.7568	0
2022-07-25 21:23:55	3724.47		7.7568	0
2022-07-25 21:24:00	2447.4		7.7568	0
2022-07-25 21:24:05	0	0	7.7568	0
2022-07-25 21:24:10	27.0581		7.7568	0
2022-07-25 21:24:15	978.486		7.7568	0
2022-07-25 21:24:20	1630.26		7.7568	0
2022-07-25 21:24:25	2804.13		7.7568	0
2022-07-25 21:24:30	3277.48		7.7568	0
2022-07-25 21:24:35	3518.29		7.7568	0
2022-07-25 21:24:40	3494.06		7.7568	0
2022-07-25 21:24:45	4283.4		7.7568	0
2022-07-25 21:24:50	4701.24		7.7568	0
2022-07-25 21:24:55	5491.4		7.7568	0
2022-07-25 21:25:00	6608.76		7.7568	0
2022-07-25 21:25:05	7270.57		7.7568	0
2022-07-25 21:25:10	8184.49		7.7568	0
2022-07-25 21:25:15	8063.92		7.7568	0
2022-07-25 21:25:20	8262.84		7.7568	0
2022-07-25 21:25:25	8877.65		7.7568	0
2022-07-25 21:25:30	9260.37		7.7568	0
2022-07-25 21:25:35	8743.78		7.7568	0
2022-07-25 21:25:40	8770.19		7.7568	0
2022-07-25 21:25:45	8913.31		7.7568	0
2022-07-25 21:25:50	8837.54		7.7568	0
2022-07-25 21:25:55	8705.02		7.7568	0
2022-07-25 21:26:00	8610.58		7.7568	0
2022-07-25 21:26:05	7987.45		7.7568	0
2022-07-25 21:26:10	7603.63		7.7568	0
2022-07-25 21:26:15	7377.38		7.7568	0
2022-07-25 21:26:20	6008.76		7.7568	0
2022-07-25 21:26:25	5634.38		7.7568	0
2022-07-25 21:26:30	3890.23		7.7568	0
2022-07-25 21:26:35	3216.79		7.7568	0
2022-07-25 21:26:40	3480.64		7.7568	0
2022-07-25 21:26:45	3109.37		7.7568	0
2022-07-25 21:26:50	3267.35		7.7568	0
2022-07-25 21:26:55	3336.28		7.7568	0
2022-07-25 21:27:00	3382.95		7.7568	0
2022-07-25 21:27:05	3368.86		7.7568	0
2022-07-25 21:27:10	3606.16		7.7568	0
2022-07-25 21:27:15	4023.3		7.7568	0
2022-07-25 21:27:20	4541.08		7.7568	0
2022-07-25 21:27:25	4975.35		7.7568	0
2022-07-25 21:27:30	4705.06		7.7568	0
2022-07-25 21:27:35	4620.73		7.7568	0
2022-07-25 21:27:40	4765.72		7.7568	0
2022-07-25 21:27:45	4728.99		7.7568	0
2022-07-25 21:27:50	4577.96		7.7568	0
2022-07-25 21:27:55	4386.69		7.7568	0
2022-07-25 21:28:00	4320.89		7.7568	0
2022-07-25 21:28:05	4192.44		7.7568	0
2022-07-25 21:28:10	4198.7		7.7568	0
2022-07-25 21:28:15	4684.13		7.7568	0
2022-07-25 21:28:20	5208.35		7.7568	0
2022-07-25 21:28:25	5159.11		7.7568	0
2022-07-25 21:28:30	5598.04		7.7568	0
2022-07-25 21:28:35	5851.58		7.7568	0
2022-07-25 21:28:40	6181.37		7.7568	0
2022-07-25 21:28:45	6914.14		7.7568	0
2022-07-25 21:28:50	7280.25		7.7568	0
2022-07-25 21:28:55	7693.18		7.7568	0
2022-07-25 21:29:00	7528.64		7.7568	0
2022-07-25 21:29:05	7346.27		7.7568	0
2022-07-25 21:29:10	6983.22		7.7568	0
2022-07-25 21:29:15	7311.22		7.7568	0
2022-07-25 21:29:20	7847.33		7.7568	0
2022-07-25 21:29:25	8803.5		7.7568	0
2022-07-25 21:29:30	9294.23		7.7568	0
2022-07-25 21:29:35	10036.3		7.7568	0
2022-07-25 21:29:40	10815.9		7.7568	0
2022-07-25 21:29:45	11429		7.7568	0
2022-07-25 21:29:50	11595.2		7.7568	0
2022-07-25 21:29:55	11661.9		7.7568	0
2022-07-25 21:30:00	11742.3		7.7568	0
2022-07-25 21:30:05	11767.3		7.7568	0
2022-07-25 21:30:10	11209		7.7568	0
2022-07-25 21:30:15	11605.5		7.7568	0
2022-07-25 21:30:20	11232.9		7.7568	0
2022-07-25 21:30:25	11062		7.7568	0
2022-07-25 21:30:30	11897.2		7.7568	0
2022-07-25 21:30:35	11567.7		7.7568	0
2022-07-25 21:30:40	11193.8		7.7568	0
2022-07-25 21:30:45	11311.1		7.7568	0
2022-07-25 21:31:00	12457.4		7.7568	0
2022-07-25 21:31:05	11885.7		7.7568	0
2022-07-25 21:31:10	12051.8		7.7568	0
2022-07-25 21:31:15	12380		7.7568	0
2022-07-25 21:31:20	11700.5		7.7568	0
2022-07-25 21:31:25	10885		7.7568	0
2022-07-25 21:31:30	10014.7		7.7568	0
2022-07-25 21:31:35	9056		7.7568	0
2022-07-25 21:31:40	7956.57		7.7568	0
2022-07-25 21:31:45	7042.94		7.7568	0
2022-07-25 21:31:50	6958.9		7.7568	0
2022-07-25 21:31:55	7164.03		7.7568	0
2022-07-25 21:32:00	6629.63		7.7568	0
2022-07-25 21:32:05	6227.6		7.7568	0
2022-07-25 21:32:10	6013.07		7.7568	0
2022-07-25 21:32:15	6322.92		7.7568	0
2022-07-25 21:32:20	6398.16		7.7568	0
2022-07-25 21:32:25	6088.92		7.7568	0
2022-07-25 21:32:30	5588.46		7.7568	0
2022-07-25 21:32:35	5738.98		7.7568	0
2022-07-25 21:32:40	6147.44		7.7568	0
2022-07-25 21:32:45	6047.77		7.7568	0
2022-07-25 21:32:50	6269		7.7568	0
2022-07-25 21:32:55	6560.89		7.7568	0
2022-07-25 21:33:00	6215.47		7.7568	0
2022-07-25 21:33:05	5893.9		7.7568	0
2022-07-25 21:33:10	5311.39		7.7568	0
2022-07-25 21:33:15	4493.17		7.7568	0
2022-07-25 21:33:20	4414.25		7.7568	0
2022-07-25 21:33:25	3965.65		7.7568	0
2022-07-25 21:33:30	4148.38		7.7568	0
2022-07-25 21:33:35	4441.89		7.7568	0
2022-07-25 21:33:40	4526.19		7.7568	0
2022-07-25 21:33:45	5180.08		7.7568	0
2022-07-25 21:33:50	4781.39		7.7568	0
2022-07-25 21:33:55	4785.66		7.7568	0
2022-07-25 21:34:00	4807.07		7.7568	0
2022-07-25 21:34:05	5167.73		7.7568	0
2022-07-25 21:34:10	4757.14		7.7568	0
2022-07-25 21:34:15	4680.53		7.7568	0
2022-07-25 21:34:20	5052.29		7.7568	0
2022-07-25 21:34:25	5418.33		7.7568	0
2022-07-25 21:34:30	5264.86		7.7568	0
2022-07-25 21:34:35	5949.33		7.7568	0
2022-07-25 21:34:40	5836.96		7.7568	0
2022-07-25 21:34:45	6106.37		7.7568	0
2022-07-25 21:34:50	6609.38		7.7568	0
2022-07-25 21:34:55	6929.44		7.7568	0
2022-07-25 21:35:00	6802.57		7.7568	0
2022-07-25 21:35:05	6598.25		7.7568	0
2022-07-25 21:35:10	6397.47		7.7568	0
2022-07-25 21:35:15	6512.9		7.7568	0
2022-07-25 21:35:20	6109.77		7.7568	0
2022-07-25 21:35:25	6246.47		7.7568	0
2022-07-25 21:35:30	5677.33		7.7568	0
2022-07-25 21:35:35	5397.69		7.7568	0
2022-07-25 21:35:40	5706.08		7.7568	0
2022-07-25 21:35:45	5409.52		7.7568	0
2022-07-25 21:35:50	4742.83		7.7568	0
2022-07-25 21:35:55	2177.62		7.7568	0
2022-07-25 21:36:00	1849.74		7.7568	0
2022-07-25 21:36:05	1542.58		7.7568	0
2022-07-25 21:36:10	1875.44		7.7568	0
2022-07-25 21:36:15	2680.08		7.7568	0
2022-07-25 21:36:20	2785.22		7.7568	0
2022-07-25 21:36:25	2896.69		7.7568	0
2022-07-25 21:36:30	2981.24		7.7568	0
2022-07-25 21:36:35	3458.11		7.7568	0
2022-07-25 21:36:40	4155.99		7.7568	0
2022-07-25 21:36:45	5387.2		7.7568	0
2022-07-25 21:36:50	5143.23		7.7568	0
2022-07-25 21:36:55	5759.99		7.7568	0
2022-07-25 21:37:00	5817.56		7.7568	0
2022-07-25 21:37:05	4667.87		7.7568	0
2022-07-25 21:37:10	4768.63		7.7568	0
2022-07-25 21:37:15	4747.77		7.7568	0
2022-07-25 21:37:20	4873.02		7.7568	0
2022-07-25 21:37:25	4601.36		7.7568	0
2022-07-25 21:37:30	4938.31		7.7568	0
2022-07-25 21:37:35	4647.18		7.7568	0
2022-07-25 21:37:40	4421.18		7.7568	0
2022-07-25 21:37:45	3943.97		7.7568	0
2022-07-25 21:37:50	4356.67		7.7568	0
2022-07-25 21:37:55	3689.35		7.7568	0
2022-07-25 21:38:00	2390.28		7.7568	0
2022-07-25 21:38:05	2201.37		7.7568	0
2022-07-25 21:38:10	1972.39		7.7568	0
2022-07-25 21:38:15	785.539		7.7568	0
2022-07-25 21:38:20	729.638		7.7568	0
2022-07-25 21:38:25	1199.72		7.7568	0
2022-07-25 21:38:30	1123.49		7.7568	0
2022-07-25 21:38:35	2780.57		7.7568	0
2022-07-25 21:38:40	2479.92		7.7568	0
2022-07-25 21:38:45	2344.95		7.7568	0
2022-07-25 21:38:50	1823.26		7.7568	0
2022-07-25 21:38:55	1478.56		7.7568	0
2022-07-25 21:39:00	1291.36		7.7568	0
2022-07-25 21:39:05	1480.34		7.7568	0
2022-07-25 21:39:10	1447.52		7.7568	0
2022-07-25 21:39:15	412.839		7.7568	0
2022-07-25 21:39:20	214.176		7.7568	0
2022-07-25 21:39:25	46.3872		7.7568	0
2022-07-25 21:39:30	0	0	7.7568	0
2022-07-25 21:39:35	0	0	7.7568	0
2022-07-25 21:39:40	0	0	7.7568	0
2022-07-25 21:39:45	0	0	7.7568	0
2022-07-25 21:39:50	268.157		7.7568	0
2022-07-25 21:39:55	832.046		7.7568	0
2022-07-25 21:40:00	1495.42		7.7568	0
2022-07-25 21:40:05	2051.16		7.7568	0
2022-07-25 21:40:10	2239.69		7.7568	0
2022-07-25 21:40:15	2085.35		7.7568	0
2022-07-25 21:40:20	2094.24		7.7568	0
2022-07-25 21:40:25	3138.53		7.7568	0
2022-07-25 21:40:30	3658.85		7.7568	0
2022-07-25 21:40:35	3912.39		7.7568	0
2022-07-25 21:40:40	4339.24		7.7568	0
2022-07-25 21:40:45	4663.78		7.7568	0
2022-07-25 21:40:50	4578.02		7.7568	0
2022-07-25 21:40:55	4538.95		7.7568	0
2022-07-25 21:41:00	4456.53		7.7568	0
2022-07-25 21:41:05	4546.02		7.7568	0
2022-07-25 21:41:10	4402.08		7.7568	0
2022-07-25 21:41:15	5113.46		7.7568	0
2022-07-25 21:41:20	6455.94		7.7568	0
2022-07-25 21:41:25	7156.17		7.7568	0
2022-07-25 21:41:30	7626.62		7.7568	0
2022-07-25 21:41:35	8538.78		7.7568	0
2022-07-25 21:41:40	8306.79		7.7568	0
2022-07-25 21:41:45	8054		7.7568	0
2022-07-25 21:41:50	7857.7		7.7568	0
2022-07-25 21:41:55	7872.71		7.7568	0
2022-07-25 21:42:00	7924.65		7.7568	0
2022-07-25 21:42:05	7841.84		7.7568	0
2022-07-25 21:42:10	7047.62		7.7568	0
2022-07-25 21:42:15	6109.67		7.7568	0
2022-07-25 21:42:20	6579.38		7.7568	0
2022-07-25 21:42:25	7386.32		7.7568	0
2022-07-25 21:42:30	8456.03		7.7568	0
2022-07-25 21:42:35	8136.71		7.7568	0
2022-07-25 21:42:40	7470.55		7.7568	0
2022-07-25 21:42:45	6521.41		7.7568	0
2022-07-25 21:42:50	6391.58		7.7568	0
2022-07-25 21:42:55	5779.4		7.7568	0
2022-07-25 21:43:00	4778.89		7.7568	0
2022-07-25 21:43:05	4733.83		7.7568	0
2022-07-25 21:43:10	5070.13		7.7568	0
2022-07-25 21:43:15	5398.19		7.7568	0
2022-07-25 21:43:20	5731.21		7.7568	0
2022-07-25 21:43:25	5847.08		7.7568	0
2022-07-25 21:43:30	5855.49		7.7568	0
2022-07-25 21:43:35	5961.95		7.7568	0
2022-07-25 21:43:40	6365.14		7.7568	0
2022-07-25 21:43:45	6834.82		7.7568	0
2022-07-25 21:43:50	5926.88		7.7568	0
2022-07-25 21:43:55	5557.11		7.7568	0
2022-07-25 21:44:00	5196.99		7.7568	0
2022-07-25 21:44:05	6077.12		7.7568	0
2022-07-25 21:44:10	7330.84		7.7568	0
2022-07-25 21:44:15	8543.75		7.7568	0
2022-07-25 21:44:20	8968.43		7.7568	0
2022-07-25 21:44:25	9266.48		7.7568	0
2022-07-25 21:44:30	8839.32		7.7568	0
2022-07-25 21:44:35	7902.99		7.7568	0
2022-07-25 21:44:40	7971.31		7.7568	0
2022-07-25 21:44:45	8324.12		7.7568	0
2022-07-25 21:44:50	7905.37		7.7568	0
2022-07-25 21:44:55	7469.56		7.7568	0
2022-07-25 21:45:00	7234.43		7.7568	0
2022-07-25 21:45:05	6761.27		7.7568	0
2022-07-25 21:45:10	6751.87		7.7568	0
2022-07-25 21:45:15	7272.37		7.7568	0
2022-07-25 21:45:20	7443.31		7.7568	0
2022-07-25 21:45:25	7521.2		7.7568	0
2022-07-25 21:45:30	7301.93		7.7568	0
2022-07-25 21:45:35	6668.7		7.7568	0
2022-07-25 21:45:40	5879.72		7.7568	0
2022-07-25 21:45:45	5076.92		7.7568	0
2022-07-25 21:45:50	4930.48		7.7568	0
2022-07-25 21:45:55	5781.51		7.7568	0
2022-07-25 21:46:00	5559.31		7.7568	0
2022-07-25 21:46:05	4223.67		7.7568	0
2022-07-25 21:46:10	3132.84		7.7568	0
2022-07-25 21:46:15	2384.35		7.7568	0
2022-07-25 21:46:20	1327.37		7.7568	0
2022-07-25 21:46:25	922.672		7.7568	0
2022-07-25 21:46:30	632.324		7.7568	0
2022-07-25 21:46:35	1161.54		7.7568	0
2022-07-25 21:46:40	2107.59		7.7568	0
2022-07-25 21:46:45	3220.4		7.7568	0
2022-07-25 21:46:50	4522.63		7.7568	0
2022-07-25 21:46:55	4697.57		7.7568	0
2022-07-25 21:47:00	4935.05		7.7568	0
2022-07-25 21:47:05	5626.94		7.7568	0
2022-07-25 21:47:10	6874.71		7.7568	0
2022-07-25 21:47:15	6747.21		7.7568	0
2022-07-25 21:47:20	6974.31		7.7568	0
2022-07-25 21:47:25	7136.97		7.7568	0
2022-07-25 21:47:30	7746.9		7.7568	0
2022-07-25 21:47:35	9412.42		7.7568	0
2022-07-25 21:47:40	9151.04		7.7568	0
2022-07-25 21:47:45	9219.69		7.7568	0
2022-07-25 21:47:50	9109.71		7.7568	0
2022-07-25 21:47:55	8875.09		7.7568	0
2022-07-25 21:48:00	8522.64		7.7568	0
2022-07-25 21:48:05	8265.41		7.7568	0
2022-07-25 21:48:10	7708.32		7.7568	0
2022-07-25 21:48:15	6934.71		7.7568	0
2022-07-25 21:48:20	6678.54		7.7568	0
2022-07-25 21:48:25	6661.59		7.7568	0
2022-07-25 21:48:30	6979.03		7.7568	0
2022-07-25 21:48:35	7110.92		7.7568	0
2022-07-25 21:48:40	6557.78		7.7568	0
2022-07-25 21:48:45	7125.45		7.7568	0
2022-07-25 21:48:50	7522.23		7.7568	0
2022-07-25 21:48:55	7829.86		7.7568	0
2022-07-25 21:49:00	7586.57		7.7568	0
2022-07-25 21:49:05	7723.05		7.7568	0
2022-07-25 21:49:10	7714.06		7.7568	0
2022-07-25 21:49:15	7835.91		7.7568	0
2022-07-25 21:49:20	7542.35		7.7568	0
2022-07-25 21:49:25	7974.54		7.7568	0
2022-07-25 21:49:30	8154.91		7.7568	0
2022-07-25 21:49:35	8697.14		7.7568	0
2022-07-25 21:49:40	8746.82		7.7568	0
2022-07-25 21:49:45	9388.71		7.7568	0
2022-07-25 21:49:50	8986.39		7.7568	0
2022-07-25 21:49:55	9016.57		7.7568	0
2022-07-25 21:50:00	8738.78		7.7568	0
2022-07-25 21:50:05	9049.29		7.7568	0
2022-07-25 21:50:10	8591.71		7.7568	0
2022-07-25 21:50:15	7604.83		7.7568	0
2022-07-25 21:50:20	6497.55		7.7568	0
2022-07-25 21:50:25	5916.08		7.7568	0
2022-07-25 21:50:30	5596.95		7.7568	0
2022-07-25 21:50:35	5346.69		7.7568	0
2022-07-25 21:50:40	4953.55		7.7568	0
2022-07-25 21:50:45	4535.47		7.7568	0
2022-07-25 21:50:50	4043.12		7.7568	0
2022-07-25 21:50:55	4202.97		7.7568	0
2022-07-25 21:51:00	4137.05		7.7568	0
2022-07-25 21:51:05	3562.25		7.7568	0
2022-07-25 21:51:10	970.341		7.7568	0
2022-07-25 21:51:15	571.261		7.7568	0
2022-07-25 21:51:20	660.692		7.7568	0
2022-07-25 21:51:25	724.95		7.7568	0
2022-07-25 21:51:30	1989.71		7.7568	0
2022-07-25 21:51:35	3144.49		7.7568	0
2022-07-25 21:51:40	3750.77		7.7568	0
2022-07-25 21:51:45	4443.99		7.7568	0
2022-07-25 21:51:50	5093.15		7.7568	0
2022-07-25 21:51:55	6185.85		7.7568	0
2022-07-25 21:52:00	7249.35		7.7568	0
2022-07-25 21:52:05	8203.18		7.7568	0
2022-07-25 21:52:10	9692.88		7.7568	0
2022-07-25 21:52:15	10183.9		7.7568	0
2022-07-25 21:52:20	10179.7		7.7568	0
2022-07-25 21:52:25	9223.73		7.7568	0
2022-07-25 21:52:30	8344.82		7.7568	0
2022-07-25 21:52:35	7954.92		7.7568	0
2022-07-25 21:52:40	7604.74		7.7568	0
2022-07-25 21:52:45	7320.48		7.7568	0
2022-07-25 21:52:50	7193.43		7.7568	0
2022-07-25 21:52:55	6835.51		7.7568	0
2022-07-25 21:53:00	7135.26		7.7568	0
2022-07-25 21:53:05	7484.19		7.7568	0
2022-07-25 21:53:10	8307.01		7.7568	0
2022-07-25 21:53:15	8365.6		7.7568	0
2022-07-25 21:53:20	8621.07		7.7568	0
2022-07-25 21:53:25	7961.73		7.7568	0
2022-07-25 21:53:30	7756.08		7.7568	0
2022-07-25 21:53:35	7304.49		7.7568	0
2022-07-25 21:53:40	7152.7		7.7568	0
2022-07-25 21:53:45	6510.01		7.7568	0
2022-07-25 21:53:50	6516.72		7.7568	0
2022-07-25 21:53:55	6799.76		7.7568	0
2022-07-25 21:54:00	6081.66		7.7568	0
2022-07-25 21:54:05	5976.18		7.7568	0
2022-07-25 21:54:10	5978.16		7.7568	0
2022-07-25 21:54:15	5612.38		7.7568	0
2022-07-25 21:54:20	5434.56		7.7568	0
2022-07-25 21:54:25	5481.15		7.7568	0
2022-07-25 21:54:30	5843.27		7.7568	0
2022-07-25 21:54:35	6073.06		7.7568	0
2022-07-25 21:54:40	7331.8		7.7568	0
2022-07-25 21:54:45	7421.16		7.7568	0
2022-07-25 21:54:50	7863.01		7.7568	0
2022-07-25 21:54:55	7949.46		7.7568	0
2022-07-25 21:55:00	7872.3		7.7568	0
2022-07-25 21:55:05	6999.08		7.7568	0
2022-07-25 21:55:10	6856.98		7.7568	0
2022-07-25 21:55:15	6919.63		7.7568	0
2022-07-25 21:55:20	7477.81		7.7568	0
2022-07-25 21:55:25	8446.03		7.7568	0
2022-07-25 21:55:30	8776.92		7.7568	0
2022-07-25 21:55:35	8926.52		7.7568	0
2022-07-25 21:55:40	9335.89		7.7568	0
2022-07-25 21:55:45	9458.79		7.7568	0
2022-07-25 21:55:50	8737.16		7.7568	0
2022-07-25 21:55:55	7360.41		7.7568	0
2022-07-25 21:56:00	6252.61		7.7568	0
2022-07-25 21:56:05	5789.49		7.7568	0
2022-07-25 21:56:10	5062.49		7.7568	0
2022-07-25 21:56:15	4330.69		7.7568	0
2022-07-25 21:56:20	4195.77		7.7568	0
2022-07-25 21:56:25	4064.35		7.7568	0
2022-07-25 21:56:30	4273.68		7.7568	0
2022-07-25 21:56:35	5380.05		7.7568	0
2022-07-25 21:56:40	6598.23		7.7568	0
2022-07-25 21:56:45	6796.66		7.7568	0
2022-07-25 21:56:50	6649.76		7.7568	0
2022-07-25 21:56:55	6267.76		7.7568	0
2022-07-25 21:57:00	5651.38		7.7568	0
2022-07-25 21:57:05	5655.22		7.7568	0
2022-07-25 21:57:10	5395.64		7.7568	0
2022-07-25 21:57:15	4555.77		7.7568	0
2022-07-25 21:57:20	4461.08		7.7568	0
2022-07-25 21:57:25	2780.74		7.7568	0
2022-07-25 21:57:30	2785.71		7.7568	0
2022-07-25 21:57:35	2546.75		7.7568	0
2022-07-25 21:57:40	2332.56		7.7568	0
2022-07-25 21:57:45	2487.46		7.7568	0
2022-07-25 21:57:50	2414.97		7.7568	0
2022-07-25 21:57:55	2208.46		7.7568	0
2022-07-25 21:58:00	2118.34		7.7568	0
2022-07-25 21:58:05	1496.75		7.7568	0
2022-07-25 21:58:10	1576.35		7.7568	0
2022-07-25 21:58:15	2914.89		7.7568	0
2022-07-25 21:58:20	4305.63		7.7568	0
2022-07-25 21:58:25	5613.75		7.7568	0
2022-07-25 21:58:30	6695.01		7.7568	0
2022-07-25 21:58:35	7343.28		7.7568	0
2022-07-25 21:58:40	8452.35		7.7568	0
2022-07-25 21:58:45	8888.32		7.7568	0
2022-07-25 21:58:50	8389.49		7.7568	0
2022-07-25 21:58:55	7952.1		7.7568	0
2022-07-25 21:59:00	7617.48		7.7568	0
2022-07-25 21:59:05	8307.16		7.7568	0
2022-07-25 21:59:10	9057.5		7.7568	0
2022-07-25 21:59:15	9803.66		7.7568	0
2022-07-25 21:59:20	9678.07		7.7568	0
2022-07-25 21:59:25	9154.35		7.7568	0
2022-07-25 21:59:30	8312.78		7.7568	0
2022-07-25 21:59:35	7793.95		7.7568	0
2022-07-25 21:59:40	7215.34		7.7568	0
2022-07-25 21:59:45	6212.84		7.7568	0
2022-07-25 21:59:50	5661.07		7.7568	0
2022-07-25 21:59:55	5434.41		7.7568	0
2022-07-25 22:00:05	5166.05		7.7568	0
2022-07-25 22:00:10	5197.24		7.7568	0
2022-07-25 22:00:15	5468.7		7.7568	0
2022-07-25 22:00:20	5963.28		7.7568	0
2022-07-25 22:00:25	6482.68		7.7568	0
2022-07-25 22:00:30	6965.17		7.7568	0
2022-07-25 22:00:35	6924.84		7.7568	0
2022-07-25 22:00:40	6869.08		7.7568	0
2022-07-25 22:00:45	6757.11		7.7568	0
2022-07-25 22:00:50	6496.78		7.7568	0
2022-07-25 22:00:55	6216.65		7.7568	0
2022-07-25 22:01:00	6628.01		8.46196	0
2022-07-25 22:01:05	6164.15		8.46196	0
2022-07-25 22:01:10	4997.31		8.46196	0
2022-07-25 22:01:15	4880.73		8.46196	0
2022-07-25 22:01:20	4816.77		8.46196	0
2022-07-25 22:01:25	4898.85		8.46196	0
2022-07-25 22:01:30	4869.53		8.46196	0
2022-07-25 22:01:35	5062.74		8.46196	0
2022-07-25 22:01:40	5165.59		8.46196	0
2022-07-25 22:01:45	5017.18		8.46196	0
2022-07-25 22:01:50	4702.65		8.46196	0
2022-07-25 22:01:55	4873.32		8.46196	0
2022-07-25 22:02:00	5038.05		8.46196	0
2022-07-25 22:02:05	4968.39		8.46196	0
2022-07-25 22:02:10	4845.12		8.46196	0
2022-07-25 22:02:15	5017.64		8.46196	0
2022-07-25 22:02:20	5087.37		8.46196	0
2022-07-25 22:02:25	4736.63		8.46196	0
2022-07-25 22:02:30	4841.65		8.46196	0
2022-07-25 22:02:35	6548.83		8.46196	0
2022-07-25 22:02:40	7077.89		8.46196	0
2022-07-25 22:02:45	7478.32		8.46196	0
2022-07-25 22:02:50	7579.38		8.46196	0
2022-07-25 22:02:55	7334.17		8.46196	0
2022-07-25 22:03:00	7405.77		8.46196	0
2022-07-25 22:03:05	7104.37		8.46196	0
2022-07-25 22:03:10	7157.73		8.46196	0
2022-07-25 22:03:15	7098.44		8.46196	0
2022-07-25 22:03:20	6772.71		8.46196	0
2022-07-25 22:03:25	6434.79		8.46196	0
2022-07-25 22:03:30	6130.94		8.46196	0
2022-07-25 22:03:35	6289.7		8.46196	0
2022-07-25 22:03:40	6803.73		8.46196	0
2022-07-25 22:03:45	7185.19		8.46196	0
2022-07-25 22:03:50	7496.22		8.46196	0
2022-07-25 22:03:55	7767.72		8.46196	0
2022-07-25 22:04:00	7592.25		8.46196	0
2022-07-25 22:04:05	7304.9		8.46196	0
2022-07-25 22:04:10	6731.94		8.46196	0
2022-07-25 22:04:15	6831.95		8.46196	0
2022-07-25 22:04:20	6874.25		8.46196	0
2022-07-25 22:04:25	7415.85		8.46196	0
2022-07-25 22:04:30	7578.11		8.46196	0
2022-07-25 22:04:35	7391.34		8.46196	0
2022-07-25 22:04:40	7305.16		8.46196	0
2022-07-25 22:04:45	8085.48		8.46196	0
2022-07-25 22:04:50	7387.06		8.46196	0
2022-07-25 22:04:55	6449.72		8.46196	0
2022-07-25 22:05:00	6246.36		8.46196	0
2022-07-25 22:05:05	5726.68		8.46196	0
2022-07-25 22:05:10	5388.87		8.46196	0
2022-07-25 22:05:15	5562.1		8.46196	0
2022-07-25 22:05:20	6202.19		8.46196	0
2022-07-25 22:05:25	6421.86		8.46196	0
2022-07-25 22:05:30	5960.08		8.46196	0
2022-07-25 22:05:35	6641.21		8.46196	0
2022-07-25 22:05:40	6696.76		8.46196	0
2022-07-25 22:05:45	7089.93		8.46196	0
2022-07-25 22:05:50	7255.99		8.46196	0
2022-07-25 22:05:55	7179.88		8.46196	0
2022-07-25 22:06:00	6546.22		8.46196	0
2022-07-25 22:06:05	5402.42		8.46196	0
2022-07-25 22:06:10	5009.91		8.46196	0
2022-07-25 22:06:15	4979		8.46196	0
2022-07-25 22:06:20	4959.49		8.46196	0
2022-07-25 22:06:25	5044.5		8.46196	0
2022-07-25 22:06:30	5102.09		8.46196	0
2022-07-25 22:06:35	4949.57		8.46196	0
2022-07-25 22:06:40	4781.28		8.46196	0
2022-07-25 22:06:45	4172.68		8.46196	0
2022-07-25 22:06:50	4062.18		8.46196	0
2022-07-25 22:06:55	3741.78		8.46196	0
2022-07-25 22:07:00	4032.73		8.46196	0
2022-07-25 22:07:05	4364.95		8.46196	0
2022-07-25 22:07:10	4644.27		8.46196	0
2022-07-25 22:07:15	5701.04		8.46196	0
2022-07-25 22:07:20	6140.2		8.46196	0
2022-07-25 22:07:25	6151.97		8.46196	0
2022-07-25 22:07:30	6461		8.46196	0
2022-07-25 22:07:35	6207.36		8.46196	0
2022-07-25 22:07:40	6095.11		8.46196	0
2022-07-25 22:07:45	6296.09		8.46196	0
2022-07-25 22:07:50	6259.57		8.46196	0
2022-07-25 22:07:55	5975.13		8.46196	0
2022-07-25 22:08:00	5804.07		8.46196	0
2022-07-25 22:08:05	5308.92		8.46196	0
2022-07-25 22:08:10	5024.03		8.46196	0
2022-07-25 22:08:15	5294.42		8.46196	0
2022-07-25 22:08:20	5446.91		8.46196	0
2022-07-25 22:08:25	5626.72		8.46196	0
2022-07-25 22:08:30	5920.05		8.46196	0
2022-07-25 22:08:35	5745.96		8.46196	0
2022-07-25 22:08:40	5329.68		8.46196	0
2022-07-25 22:08:45	5082.14		8.46196	0
2022-07-25 22:08:50	5233.54		8.46196	0
2022-07-25 22:08:55	5434.04		8.46196	0
2022-07-25 22:09:00	5585.5		8.46196	0
2022-07-25 22:09:05	5633.92		8.46196	0
2022-07-25 22:09:10	6032		8.46196	0
2022-07-25 22:09:15	6262.19		8.46196	0
2022-07-25 22:09:20	6608.91		8.46196	0
2022-07-25 22:09:25	7405.67		8.46196	0
2022-07-25 22:09:30	8045.61		8.46196	0
2022-07-25 22:09:35	8302.09		8.46196	0
2022-07-25 22:09:40	8534.31		8.46196	0
2022-07-25 22:09:45	8722.95		8.46196	0
2022-07-25 22:09:50	8495.72		8.46196	0
2022-07-25 22:09:55	8440.43		8.46196	0
2022-07-25 22:10:00	8289.15		8.46196	0
2022-07-25 22:10:05	8273.72		8.46196	0
2022-07-25 22:10:10	8362.04		8.46196	0
2022-07-25 22:10:15	8429.75		8.46196	0
2022-07-25 22:10:20	8285.76		8.46196	0
2022-07-25 22:10:25	8194.87		8.46196	0
2022-07-25 22:10:30	8731.03		8.46196	0
2022-07-25 22:10:35	9179.71		8.46196	0
2022-07-25 22:10:40	8923.93		8.46196	0
2022-07-25 22:10:45	8937.44		8.46196	0
2022-07-25 22:10:50	9256.55		8.46196	0
2022-07-25 22:10:55	8620.8		8.46196	0
2022-07-25 22:11:00	8226.07		8.46196	0
2022-07-25 22:11:05	7706.31		8.46196	0
2022-07-25 22:11:10	7505.91		8.46196	0
2022-07-25 22:11:15	7231.5		8.46196	0
2022-07-25 22:11:20	6890.53		8.46196	0
2022-07-25 22:11:25	6489.92		8.46196	0
2022-07-25 22:11:30	6010.41		8.46196	0
2022-07-25 22:11:35	6050.94		8.46196	0
2022-07-25 22:11:40	6444.91		8.46196	0
2022-07-25 22:11:45	6437.11		8.46196	0
2022-07-25 22:11:50	5882.56		8.46196	0
2022-07-25 22:11:55	5197.95		8.46196	0
2022-07-25 22:12:00	4928.74		8.46196	0
2022-07-25 22:12:05	5529.42		8.46196	0
2022-07-25 22:12:10	5416.87		8.46196	0
2022-07-25 22:12:15	4801.94		8.46196	0
2022-07-25 22:12:20	4645.53		8.46196	0
2022-07-25 22:12:25	4499.46		8.46196	0
2022-07-25 22:12:30	4789.55		8.46196	0
2022-07-25 22:12:35	5329.84		8.46196	0
2022-07-25 22:12:40	5200.66		8.46196	0
2022-07-25 22:12:45	4958.93		8.46196	0
2022-07-25 22:12:50	4993.95		8.46196	0
2022-07-25 22:12:55	4469.29		8.46196	0
2022-07-25 22:13:00	4630.15		8.46196	0
2022-07-25 22:13:05	4676.09		8.46196	0
2022-07-25 22:13:10	4392.7		8.46196	0
2022-07-25 22:13:15	4301.57		8.46196	0
2022-07-25 22:13:20	3926.8		8.46196	0
2022-07-25 22:13:25	3711.48		8.46196	0
2022-07-25 22:13:30	3668.19		8.46196	0
2022-07-25 22:13:35	3491.55		8.46196	0
2022-07-25 22:13:40	3322.14		8.46196	0
2022-07-25 22:13:45	3165.22		8.46196	0
2022-07-25 22:13:50	3467.48		8.46196	0
2022-07-25 22:13:55	3879.65		8.46196	0
2022-07-25 22:14:00	3912.03		8.46196	0
2022-07-25 22:14:05	3738.14		8.46196	0
2022-07-25 22:14:10	3710.65		8.46196	0
2022-07-25 22:14:15	3009.3		8.46196	0
2022-07-25 22:14:20	3041.86		8.46196	0
2022-07-25 22:14:25	2939.76		8.46196	0
2022-07-25 22:14:30	3051.36		8.46196	0
2022-07-25 22:14:35	3306.93		8.46196	0
2022-07-25 22:14:40	3693.99		8.46196	0
2022-07-25 22:14:45	4067.35		8.46196	0
2022-07-25 22:14:50	4172.39		8.46196	0
2022-07-25 22:14:55	5066.3		8.46196	0
2022-07-25 22:15:00	6455.04		8.46196	0
2022-07-25 22:15:05	7050.62		8.46196	0
2022-07-25 22:15:10	7831.66		8.46196	0
2022-07-25 22:15:15	8741.82		8.46196	0
2022-07-25 22:15:20	9049.51		8.46196	0
2022-07-25 22:15:25	9127.41		8.46196	0
2022-07-25 22:15:30	9379.71		8.46196	0
2022-07-25 22:15:35	9749.13		8.46196	0
2022-07-25 22:15:40	10294.4		8.46196	0
2022-07-25 22:15:45	10487.2		8.46196	0
2022-07-25 22:15:50	10280.8		8.46196	0
2022-07-25 22:15:55	10044.8		8.46196	0
2022-07-25 22:16:00	9857.92		8.46196	0
2022-07-25 22:16:05	9815.49		8.46196	0
2022-07-25 22:16:10	9687.15		8.46196	0
2022-07-25 22:16:15	9444.32		8.46196	0
2022-07-25 22:16:20	9666.38		8.46196	0
2022-07-25 22:16:25	9560.45		8.46196	0
2022-07-25 22:16:30	9262.29		8.46196	0
2022-07-25 22:16:35	9022.06		8.46196	0
2022-07-25 22:16:40	8948.88		8.46196	0
2022-07-25 22:16:45	8658.46		8.46196	0
2022-07-25 22:16:50	8652.36		8.46196	0
2022-07-25 22:16:55	8475.41		8.46196	0
2022-07-25 22:17:00	8384.68		8.46196	0
2022-07-25 22:17:05	7655.15		8.46196	0
2022-07-25 22:17:10	7258.89		8.46196	0
2022-07-25 22:17:15	6972.24		8.46196	0
2022-07-25 22:17:20	6826.77		8.46196	0
2022-07-25 22:17:25	7014.75		8.46196	0
2022-07-25 22:17:30	7018.33		8.46196	0
2022-07-25 22:17:35	6600.68		8.46196	0
2022-07-25 22:17:40	6357.37		8.46196	0
2022-07-25 22:17:45	6329.37		8.46196	0
2022-07-25 22:17:50	5659.93		8.46196	0
2022-07-25 22:17:55	5887.77		8.46196	0
2022-07-25 22:18:00	5233.28		8.46196	0
2022-07-25 22:18:05	4712.8		8.46196	0
2022-07-25 22:18:10	4287.05		8.46196	0
2022-07-25 22:18:15	4358.96		8.46196	0
2022-07-25 22:18:20	4195.4		8.46196	0
2022-07-25 22:18:25	4093.24		8.46196	0
2022-07-25 22:18:30	4122.8		8.46196	0
2022-07-25 22:18:35	4354.73		8.46196	0
2022-07-25 22:18:40	4446.69		8.46196	0
2022-07-25 22:18:45	4704.6		8.46196	0
2022-07-25 22:18:50	4823.24		8.46196	0
2022-07-25 22:18:55	4677.2		8.46196	0
2022-07-25 22:19:00	4511.99		8.46196	0
2022-07-25 22:19:05	4519.56		8.46196	0
2022-07-25 22:19:10	4596.06		8.46196	0
2022-07-25 22:19:15	4759.15		8.46196	0
2022-07-25 22:19:20	4749.7		8.46196	0
2022-07-25 22:19:25	5101.82		8.46196	0
2022-07-25 22:19:30	4998.78		8.46196	0
2022-07-25 22:19:35	4827.95		8.46196	0
2022-07-25 22:19:40	5094.34		8.46196	0
2022-07-25 22:19:45	5708.86		8.46196	0
2022-07-25 22:19:50	6107.34		8.46196	0
2022-07-25 22:19:55	6193.08		8.46196	0
2022-07-25 22:20:00	6047.05		8.46196	0
2022-07-25 22:20:05	5653.42		8.46196	0
2022-07-25 22:20:10	5268.97		8.46196	0
2022-07-25 22:20:15	5379.55		8.46196	0
2022-07-25 22:20:20	5189.09		8.46196	0
2022-07-25 22:20:25	5257		8.46196	0
2022-07-25 22:20:30	6017.84		8.46196	0
2022-07-25 22:20:35	6653.57		8.46196	0
2022-07-25 22:20:40	6996.69		8.46196	0
2022-07-25 22:20:45	7616.29		8.46196	0
2022-07-25 22:20:50	7896.33		8.46196	0
2022-07-25 22:20:55	7795.06		8.46196	0
2022-07-25 22:21:00	7546		8.46196	0
2022-07-25 22:21:05	7451.76		8.46196	0
2022-07-25 22:21:10	7114.99		8.46196	0
2022-07-25 22:21:15	6999.37		8.46196	0
2022-07-25 22:21:20	6651.24		8.46196	0
2022-07-25 22:21:25	6042.33		8.46196	0
2022-07-25 22:21:30	5906.65		8.46196	0
2022-07-25 22:21:35	6077.07		8.46196	0
2022-07-25 22:21:40	6316.29		8.46196	0
2022-07-25 22:21:45	6165.75		8.46196	0
2022-07-25 22:21:50	6352.15		8.46196	0
2022-07-25 22:21:55	6532.05		8.46196	0
2022-07-25 22:22:00	6082.85		8.46196	0
2022-07-25 22:22:05	5815.75		8.46196	0
2022-07-25 22:22:10	5571.01		8.46196	0
2022-07-25 22:22:15	5308.35		8.46196	0
2022-07-25 22:22:20	5582.39		8.46196	0
2022-07-25 22:22:25	5859.37		8.46196	0
2022-07-25 22:22:30	6140.92		8.46196	0
2022-07-25 22:22:35	6294.09		8.46196	0
2022-07-25 22:22:40	6417.1		8.46196	0
2022-07-25 22:22:45	6497.78		8.46196	0
2022-07-25 22:22:50	6752.54		8.46196	0
2022-07-25 22:22:55	7086.99		8.46196	0
2022-07-25 22:23:00	7230.91		8.46196	0
2022-07-25 22:23:05	7665.75		8.46196	0
2022-07-25 22:23:10	8276.74		8.46196	0
2022-07-25 22:23:15	8366.43		8.46196	0
2022-07-25 22:23:20	8535.44		8.46196	0
2022-07-25 22:23:25	8412.94		8.46196	0
2022-07-25 22:23:30	8253.91		8.46196	0
2022-07-25 22:23:35	8393.37		8.46196	0
2022-07-25 22:23:40	8989.28		8.46196	0
2022-07-25 22:23:45	8972.66		8.46196	0
2022-07-25 22:23:50	9012.3		8.46196	0
2022-07-25 22:23:55	9059.07		8.46196	0
2022-07-25 22:24:00	8393.95		8.46196	0
2022-07-25 22:24:05	7759.01		8.46196	0
2022-07-25 22:24:10	7332.69		8.46196	0
2022-07-25 22:24:15	7056.26		8.46196	0
2022-07-25 22:24:20	6924.94		8.46196	0
2022-07-25 22:24:25	6954.96		8.46196	0
2022-07-25 22:24:30	6974.14		8.46196	0
2022-07-25 22:24:35	6462.28		8.46196	0
2022-07-25 22:24:40	6672.6		8.46196	0
2022-07-25 22:24:45	6590.65		8.46196	0
2022-07-25 22:24:50	6425.97		8.46196	0
2022-07-25 22:24:55	6061.44		8.46196	0
2022-07-25 22:25:00	6008.79		8.46196	0
2022-07-25 22:25:05	6500.73		8.46196	0
2022-07-25 22:25:10	6427.2		8.46196	0
2022-07-25 22:25:15	6151.95		8.46196	0
2022-07-25 22:25:20	5924.51		8.46196	0
2022-07-25 22:25:25	6197.11		8.46196	0
2022-07-25 22:25:30	6606.67		8.46196	0
2022-07-25 22:25:35	6279.15		8.46196	0
2022-07-25 22:25:40	6247.25		8.46196	0
2022-07-25 22:25:45	6595.58		8.46196	0
2022-07-25 22:25:50	7022.01		8.46196	0
2022-07-25 22:25:55	7592.07		8.46196	0
2022-07-25 22:26:00	8027.64		8.46196	0
2022-07-25 22:26:05	8359.94		8.46196	0
2022-07-25 22:26:10	8570.42		8.46196	0
2022-07-25 22:26:15	7523.37		8.46196	0
2022-07-25 22:26:20	7142.33		8.46196	0
2022-07-25 22:26:25	6939.45		8.46196	0
2022-07-25 22:26:30	5989.07		8.46196	0
2022-07-25 22:26:35	5089.37		8.46196	0
2022-07-25 22:26:40	5163.99		8.46196	0
2022-07-25 22:26:45	5655.44		8.46196	0
2022-07-25 22:26:50	6378.94		8.46196	0
2022-07-25 22:26:55	7240.66		8.46196	0
2022-07-25 22:27:00	7361.16		8.46196	0
2022-07-25 22:27:05	7641.71		8.46196	0
2022-07-25 22:27:10	7903.11		8.46196	0
2022-07-25 22:27:15	8133.23		8.46196	0
2022-07-25 22:27:20	7857.04		8.46196	0
2022-07-25 22:27:25	8202.4		8.46196	0
2022-07-25 22:27:30	8705.79		8.46196	0
2022-07-25 22:27:35	8782.15		8.46196	0
2022-07-25 22:27:40	9072.69		8.46196	0
2022-07-25 22:27:45	9632.44		8.46196	0
2022-07-25 22:27:50	10694.2		8.46196	0
2022-07-25 22:27:55	11719.9		8.46196	0
2022-07-25 22:28:00	12350.7		8.46196	0
2022-07-25 22:28:05	12697.1		8.46196	0
2022-07-25 22:28:10	12449.3		8.46196	0
2022-07-25 22:28:15	11678.1		8.46196	0
2022-07-25 22:28:20	11033.8		8.46196	0
2022-07-25 22:28:25	9489.87		8.46196	0
2022-07-25 22:28:30	7608.39		8.46196	0
2022-07-25 22:28:35	6676.57		8.46196	0
2022-07-25 22:28:40	5115.56		8.46196	0
2022-07-25 22:28:45	4583.38		8.46196	0
2022-07-25 22:28:50	4640.93		8.46196	0
2022-07-25 22:28:55	4654.16		8.46196	0
2022-07-25 22:29:00	5281.53		8.46196	0
2022-07-25 22:29:05	5661.78		8.46196	0
2022-07-25 22:29:10	5189.03		8.46196	0
2022-07-25 22:29:15	4955.43		8.46196	0
2022-07-25 22:29:20	4538.78		8.46196	0
2022-07-25 22:29:25	4562.74		8.46196	0
2022-07-26 00:00:05	3733.03		8.42121	0
2022-07-26 00:00:10	2849.55		8.42121	0
2022-07-26 00:00:15	2916.76		8.42121	0
2022-07-26 00:00:20	2590.16		8.42121	0
2022-07-26 00:00:25	2924.9		8.42121	0
2022-07-26 00:00:30	3478.77		8.42121	0
2022-07-26 00:00:35	4543.93		8.42121	0
2022-07-26 00:00:40	6071.15		8.42121	0
2022-07-26 00:00:45	8078.3		8.42121	0
2022-07-26 00:00:50	8534.49		8.42121	0
2022-07-26 00:00:55	8798.23		8.42121	0
2022-07-26 00:01:00	8481.76		8.42121	0
2022-07-26 00:01:05	6944.13		8.42121	0
2022-07-26 00:01:10	5837.52		8.42121	0
2022-07-26 00:01:15	4474.64		8.42121	0
2022-07-26 00:01:20	4134.93		8.42121	0
2022-07-26 00:01:25	3695.84		8.42121	0
2022-07-26 00:01:30	3670.88		8.42121	0
2022-07-26 00:01:35	5858.25		8.42121	0
2022-07-26 00:01:40	6573.72		8.42121	0
2022-07-26 00:01:45	6323.64		8.42121	0
2022-07-26 00:01:50	5945.64		8.42121	0
2022-07-26 00:01:55	5275.52		8.42121	0
2022-07-26 00:02:00	4651.91		8.42121	0
2022-07-26 00:02:05	4326.8		8.42121	0
2022-07-26 00:02:10	4063.43		8.42121	0
2022-07-26 00:02:15	4002.36		8.42121	0
2022-07-26 00:02:20	5441.61		8.42121	0
2022-07-26 00:02:25	4882.58		8.42121	0
2022-07-26 00:02:30	4915.6		8.42121	0
2022-07-26 00:02:35	5246.16		8.42121	0
2022-07-26 00:02:40	6048.54		8.42121	0
2022-07-26 00:02:45	6400.3		8.42121	0
2022-07-26 00:02:50	5932.43		8.42121	0
2022-07-26 00:02:55	5218.11		8.42121	0
2022-07-26 00:03:00	5732.51		8.42121	0
2022-07-26 00:03:05	5566.83		8.42121	0
2022-07-26 00:03:10	4863.08		8.42121	0
2022-07-26 00:03:15	4651.25		8.42121	0
2022-07-26 00:03:20	5480.6		8.42121	0
2022-07-26 00:03:25	5725.76		8.42121	0
2022-07-26 00:03:30	5706.88		8.42121	0
2022-07-26 00:03:35	5102.45		8.42121	0
2022-07-26 00:03:40	5019.43		8.42121	0
2022-07-26 00:03:45	5083.43		8.42121	0
2022-07-26 00:03:50	5321.93		8.42121	0
2022-07-26 00:03:55	5413.88		8.42121	0
2022-07-26 00:04:00	5475.97		8.42121	0
2022-07-26 00:04:05	6088.91		8.42121	0
2022-07-26 00:04:10	6520.28		8.42121	0
2022-07-26 00:04:15	7755.37		8.42121	0
2022-07-26 00:04:20	8146.87		8.42121	0
2022-07-26 00:04:25	9380.98		8.42121	0
2022-07-26 00:04:30	9636.57		8.42121	0
2022-07-26 00:04:35	9442.46		8.42121	0
2022-07-26 00:04:40	9860.34		8.42121	0
2022-07-26 00:04:45	10368.9		8.42121	0
2022-07-26 00:04:50	11225.3		8.42121	0
2022-07-26 00:04:55	11063.7		8.42121	0
2022-07-26 00:05:00	11245.7		8.42121	0
2022-07-26 00:05:05	9636.32		8.42121	0
2022-07-26 00:05:10	7902.81		8.42121	0
2022-07-26 00:05:15	7552.19		8.42121	0
2022-07-26 00:05:20	6977.78		8.42121	0
2022-07-26 00:05:25	7425.87		8.42121	0
2022-07-26 00:05:30	7531.85		8.42121	0
2022-07-26 00:05:35	5996.49		8.42121	0
2022-07-26 00:05:40	5608.4		8.42121	0
2022-07-26 00:05:45	4545.24		8.42121	0
2022-07-26 00:05:50	5072.47		8.42121	0
2022-07-26 00:05:55	6127.81		8.42121	0
2022-07-26 00:06:00	6670.89		8.42121	0
2022-07-26 00:06:05	7961.93		8.42121	0
2022-07-26 00:06:10	9064.43		8.42121	0
2022-07-26 00:06:15	8036.92		8.42121	0
2022-07-26 00:06:20	7575.85		8.42121	0
2022-07-26 00:06:25	8140.32		8.42121	0
2022-07-26 00:06:30	7629.89		8.42121	0
2022-07-26 00:06:35	6561.23		8.42121	0
2022-07-26 00:06:40	6583.6		8.42121	0
2022-07-26 00:06:45	7033.87		8.42121	0
2022-07-26 00:06:50	6810.31		8.42121	0
2022-07-26 00:06:55	6925.61		8.42121	0
2022-07-26 00:07:00	8123.78		8.42121	0
2022-07-26 00:07:05	8407.75		8.42121	0
2022-07-26 00:07:10	8138.68		8.42121	0
2022-07-26 00:07:15	6479.47		8.42121	0
2022-07-26 00:07:20	5354.61		8.42121	0
2022-07-26 00:07:25	4707.59		8.42121	0
2022-07-26 00:07:30	4583.85		8.42121	0
2022-07-26 00:07:35	4747.58		8.42121	0
2022-07-26 00:07:40	4630.31		8.42121	0
2022-07-26 00:07:45	4407.2		8.42121	0
2022-07-26 00:07:50	4096.46		8.42121	0
2022-07-26 00:07:55	4124.26		8.42121	0
2022-07-26 00:08:00	4138.97		8.42121	0
2022-07-26 00:08:05	4580.09		8.42121	0
2022-07-26 00:08:10	4511.3		8.42121	0
2022-07-26 00:08:15	4228.6		8.42121	0
2022-07-26 00:08:20	3195.1		8.42121	0
2022-07-26 00:08:25	3436.39		8.42121	0
2022-07-26 00:08:30	3477.69		8.42121	0
2022-07-26 00:08:35	3989.8		8.42121	0
2022-07-26 00:08:40	3966.35		8.42121	0
2022-07-26 00:08:45	3166.67		8.42121	0
2022-07-26 00:08:50	2456.94		8.42121	0
2022-07-26 00:08:55	2472.99		8.42121	0
2022-07-26 00:09:00	2598.81		8.42121	0
2022-07-26 00:09:05	2841.91		8.42121	0
2022-07-26 00:09:10	3451.94		8.42121	0
2022-07-26 00:09:15	3424.1		8.42121	0
2022-07-26 00:09:20	3432.88		8.42121	0
2022-07-26 00:09:25	3861.1		8.42121	0
2022-07-26 00:09:30	4161.26		8.42121	0
2022-07-26 00:09:35	5121.96		8.42121	0
2022-07-26 00:09:40	5349.24		8.42121	0
2022-07-26 00:09:45	5650.24		8.42121	0
2022-07-26 00:09:50	5591.95		8.42121	0
2022-07-26 00:09:55	5827.86		8.42121	0
2022-07-26 00:10:00	6259.63		8.42121	0
2022-07-26 00:10:05	6963.42		8.42121	0
2022-07-26 00:10:10	7696.48		8.42121	0
2022-07-26 00:10:15	7714.93		8.42121	0
2022-07-26 00:10:20	8094.68		8.42121	0
2022-07-26 00:10:25	7820.73		8.42121	0
2022-07-26 00:10:30	7747.37		8.42121	0
2022-07-26 00:10:35	7194.93		8.42121	0
2022-07-26 00:10:40	6421.13		8.42121	0
2022-07-26 00:10:45	6905.62		8.42121	0
2022-07-26 00:10:50	6787.02		8.42121	0
2022-07-26 00:10:55	6450.61		8.42121	0
2022-07-26 00:11:00	6299.23		8.42121	0
2022-07-26 00:11:05	5977.06		8.42121	0
2022-07-26 00:11:10	6496.73		8.42121	0
2022-07-26 00:11:15	6344.43		8.42121	0
2022-07-26 00:11:20	5190.13		8.42121	0
2022-07-26 00:11:25	3986.17		8.42121	0
2022-07-26 00:11:30	3342.48		8.42121	0
2022-07-26 00:11:35	3059.13		8.42121	0
2022-07-26 00:11:40	2314.69		8.42121	0
2022-07-26 00:11:45	3163.67		8.42121	0
2022-07-26 00:11:50	3806.87		8.42121	0
2022-07-26 00:11:55	4320.63		8.42121	0
2022-07-26 00:12:00	4013.23		8.42121	0
2022-07-26 00:12:05	4474.89		8.42121	0
2022-07-26 00:12:10	5027.06		8.42121	0
2022-07-26 00:12:15	4909.79		8.42121	0
2022-07-26 00:12:20	4484.89		8.42121	0
2022-07-26 00:12:25	4010.01		8.42121	0
2022-07-26 00:12:30	5197.94		8.42121	0
2022-07-26 00:12:35	6070.04		8.42121	0
2022-07-26 00:12:40	6235.3		8.42121	0
2022-07-26 00:12:45	6161.35		8.42121	0
2022-07-26 00:12:50	5875.43		8.42121	0
2022-07-26 00:12:55	5075.9		8.42121	0
2022-07-26 00:13:00	4287.17		8.42121	0
2022-07-26 00:13:05	3946.66		8.42121	0
2022-07-26 00:13:10	3803.2		8.42121	0
2022-07-26 00:13:15	3911.21		8.42121	0
2022-07-26 00:13:20	3650.28		8.42121	0
2022-07-26 00:13:25	4391.01		8.42121	0
2022-07-26 00:13:30	4624.47		8.42121	0
2022-07-26 00:13:35	5752.21		8.42121	0
2022-07-26 00:13:40	6328.35		8.42121	0
2022-07-26 00:13:45	6402.17		8.42121	0
2022-07-26 00:13:50	6225.43		8.42121	0
2022-07-26 00:13:55	6045.27		8.42121	0
2022-07-26 00:14:00	3780.33		8.42121	0
2022-07-26 00:14:05	2893.94		8.42121	0
2022-07-26 00:14:10	2971.65		8.42121	0
2022-07-26 00:14:15	2834.19		8.42121	0
2022-07-26 00:14:20	2946.6		8.42121	0
2022-07-26 00:14:25	3668.14		8.42121	0
2022-07-26 00:14:30	3979.85		8.42121	0
2022-07-26 00:14:35	4164.26		8.42121	0
2022-07-26 00:14:40	5728.77		8.42121	0
2022-07-26 00:14:45	7192.48		8.42121	0
2022-07-26 00:14:50	8730.46		8.42121	0
2022-07-26 00:14:55	8777.72		8.42121	0
2022-07-26 00:15:00	9291.46		8.42121	0
2022-07-26 00:15:05	9128.68		8.42121	0
2022-07-26 00:15:10	8879.49		8.42121	0
2022-07-26 00:15:15	8904		8.42121	0
2022-07-26 00:15:20	7910.71		8.42121	0
2022-07-26 00:15:25	7390.9		8.42121	0
2022-07-26 00:15:30	7124.45		8.42121	0
2022-07-26 00:15:35	6577.46		8.42121	0
2022-07-26 00:15:40	6015.64		8.42121	0
2022-07-26 00:15:45	4694.7		8.42121	0
2022-07-26 00:15:50	4553.65		8.42121	0
2022-07-26 00:15:55	4917.13		8.42121	0
2022-07-26 00:16:00	4183.32		8.42121	0
2022-07-26 00:16:05	4440.02		8.42121	0
2022-07-26 00:16:10	5167.45		8.42121	0
2022-07-26 00:16:15	5688.74		8.42121	0
2022-07-26 00:16:20	6125.97		8.42121	0
2022-07-26 00:16:25	6414.93		8.42121	0
2022-07-26 00:16:30	6728.78		8.42121	0
2022-07-26 00:16:35	8151.33		8.42121	0
2022-07-26 00:16:40	9309.63		8.42121	0
2022-07-26 00:16:45	9844.78		8.42121	0
2022-07-26 00:16:50	10804.8		8.42121	0
2022-07-26 00:16:55	10763.1		8.42121	0
2022-07-26 00:17:00	10726.7		8.42121	0
2022-07-26 00:17:05	9712.69		8.42121	0
2022-07-26 00:17:10	8874.59		8.42121	0
2022-07-26 00:17:15	8388.04		8.42121	0
2022-07-26 00:17:20	6214.68		8.42121	0
2022-07-26 00:17:25	4161.58		8.42121	0
2022-07-26 00:17:30	5468.83		8.42121	0
2022-07-26 00:17:35	7482.93		8.42121	0
2022-07-26 00:17:40	9462.39		8.42121	0
2022-07-26 00:17:45	10660.4		8.42121	0
2022-07-26 00:17:50	11375.8		8.42121	0
2022-07-26 00:17:55	11680.6		8.42121	0
2022-07-26 00:18:00	12289.2		8.42121	0
2022-07-26 00:18:05	11804.6		8.42121	0
2022-07-26 00:18:10	10436.5		8.42121	0
2022-07-26 00:18:15	7075.4		8.42121	0
2022-07-26 00:18:20	6536.44		8.42121	0
2022-07-26 00:18:25	6767.99		8.42121	0
2022-07-26 00:18:30	6643.38		8.42121	0
2022-07-26 00:18:35	6698.44		8.42121	0
2022-07-26 00:18:40	7438.08		8.42121	0
2022-07-26 00:18:45	6983.13		8.42121	0
2022-07-26 00:18:50	6736		8.42121	0
2022-07-26 00:18:55	7156.18		8.42121	0
2022-07-26 00:19:00	5948.18		8.42121	0
2022-07-26 00:19:05	4903.27		8.42121	0
2022-07-26 00:19:10	4265.13		8.42121	0
2022-07-26 00:19:15	4083.25		8.42121	0
2022-07-26 00:19:20	3734.71		8.42121	0
2022-07-26 00:19:25	3616.97		8.42121	0
2022-07-26 00:19:30	3764.99		8.42121	0
2022-07-26 00:19:35	3726.69		8.42121	0
2022-07-26 00:19:40	4383.35		8.42121	0
2022-07-26 00:19:45	5772.02		8.42121	0
2022-07-26 00:19:50	6893.04		8.42121	0
2022-07-26 00:19:55	6794.71		8.42121	0
2022-07-26 00:20:00	5629.85		8.42121	0
2022-07-26 00:20:05	5058.69		8.42121	0
2022-07-26 00:20:10	5064.22		8.42121	0
2022-07-26 00:20:15	5058.51		8.42121	0
2022-07-26 00:20:20	4981.36		8.42121	0
2022-07-26 00:20:25	4793.43		8.42121	0
2022-07-26 00:20:30	3625.66		8.42121	0
2022-07-26 00:20:35	3211.19		8.42121	0
2022-07-26 00:20:40	4070.3		8.42121	0
2022-07-26 00:20:45	4472.8		8.42121	0
2022-07-26 00:20:50	4643.73		8.42121	0
2022-07-26 00:20:55	5531.03		8.42121	0
2022-07-26 00:21:00	5273.04		8.42121	0
2022-07-26 00:21:05	5735.05		8.42121	0
2022-07-26 00:21:10	5159.5		8.42121	0
2022-07-26 00:21:15	4966.01		8.42121	0
2022-07-26 00:21:20	5479.38		8.42121	0
2022-07-26 00:21:25	7018.67		8.42121	0
2022-07-26 00:21:30	7449.79		8.42121	0
2022-07-26 00:21:35	8464.86		8.42121	0
2022-07-26 00:21:40	9944.05		8.42121	0
2022-07-26 00:21:45	11009.6		8.42121	0
2022-07-26 00:21:50	10890		8.42121	0
2022-07-26 00:21:55	10440.3		8.42121	0
2022-07-26 00:22:00	9085.96		8.42121	0
2022-07-26 00:22:05	6655.53		8.42121	0
2022-07-26 00:22:10	4895.58		8.42121	0
2022-07-26 00:22:15	5069.44		8.42121	0
2022-07-26 00:22:20	5388.82		8.42121	0
2022-07-26 00:22:25	5379.26		8.42121	0
2022-07-26 00:22:30	5602.11		8.42121	0
2022-07-26 00:22:35	6298.55		8.42121	0
2022-07-26 00:22:40	6322.67		8.42121	0
2022-07-26 00:22:45	7275.65		8.42121	0
2022-07-26 00:22:50	7940.26		8.42121	0
2022-07-26 00:22:55	8268.88		8.42121	0
2022-07-26 00:23:00	8881.53		8.42121	0
2022-07-26 00:23:05	8035.68		8.42121	0
2022-07-26 00:23:10	6821.09		8.42121	0
2022-07-26 00:23:15	5584.37		8.42121	0
2022-07-26 00:23:20	6063.47		8.42121	0
2022-07-26 00:23:25	6771.16		8.42121	0
2022-07-26 00:23:30	5127.98		8.42121	0
2022-07-26 00:23:35	4078.45		8.42121	0
2022-07-26 00:23:40	4188.11		8.42121	0
2022-07-26 00:23:45	5018.01		8.42121	0
2022-07-26 00:23:50	5013.59		8.42121	0
2022-07-26 00:23:55	4692.23		8.42121	0
2022-07-26 00:24:00	4169.27		8.42121	0
2022-07-26 00:24:05	4780.51		8.42121	0
2022-07-26 00:24:10	5392.85		8.42121	0
2022-07-26 00:24:15	4476.42		8.42121	0
2022-07-26 00:24:20	3751.39		8.42121	0
2022-07-26 00:24:25	3092.67		8.42121	0
2022-07-26 00:24:30	2899.52		8.42121	0
2022-07-26 00:24:35	2820.3		8.42121	0
2022-07-26 00:24:40	2675.3		8.42121	0
2022-07-26 00:24:45	2859.5		8.42121	0
2022-07-26 00:24:50	3609.38		8.42121	0
2022-07-26 00:24:55	3922.04		8.42121	0
2022-07-26 00:25:00	4318.89		8.42121	0
2022-07-26 00:25:05	4492.4		8.42121	0
2022-07-26 00:25:10	4195.98		8.42121	0
2022-07-26 00:25:15	4640.97		8.42121	0
2022-07-26 00:25:20	5749.56		8.42121	0
2022-07-26 00:25:25	6409.22		8.42121	0
2022-07-26 00:25:30	6191.9		8.42121	0
2022-07-26 00:25:35	5828.39		8.42121	0
2022-07-26 00:25:40	5106.27		8.42121	0
2022-07-26 00:25:45	4147.5		8.42121	0
2022-07-26 00:25:50	3629.8		8.42121	0
2022-07-26 00:25:55	3467.6		8.42121	0
2022-07-26 00:26:00	3918.27		8.42121	0
2022-07-26 00:26:05	4308.75		8.42121	0
2022-07-26 00:26:10	4680.21		8.42121	0
2022-07-26 00:26:15	5348.09		8.42121	0
2022-07-26 00:26:20	5744.52		8.42121	0
2022-07-26 00:26:25	5492.69		8.42121	0
2022-07-26 00:26:30	4815.22		8.42121	0
2022-07-26 00:26:35	4509.98		8.42121	0
2022-07-26 00:26:40	4460.74		8.42121	0
2022-07-26 00:26:45	4209.67		8.42121	0
2022-07-26 00:26:50	4092.33		8.42121	0
2022-07-26 00:26:55	3689.13		8.42121	0
2022-07-26 00:27:00	4236		8.42121	0
2022-07-26 00:27:05	4801.02		8.42121	0
2022-07-26 00:27:10	4211.1		8.42121	0
2022-07-26 00:27:15	3268.44		8.42121	0
2022-07-26 00:27:20	2935.86		8.42121	0
2022-07-26 00:27:25	4077.7		8.42121	0
2022-07-26 00:27:30	4319.25		8.42121	0
2022-07-26 00:27:35	4748.67		8.42121	0
2022-07-26 00:27:40	4156.33		8.42121	0
2022-07-26 00:27:45	4379.79		8.42121	0
2022-07-26 00:27:50	4266.58		8.42121	0
2022-07-26 00:27:55	4640.39		8.42121	0
2022-07-26 00:28:00	4898.46		8.42121	0
2022-07-26 00:28:05	5165.48		8.42121	0
2022-07-26 00:28:10	4602.07		8.42121	0
2022-07-26 00:28:15	3620.94		8.42121	0
2022-07-26 00:28:20	3015.62		8.42121	0
2022-07-26 00:28:25	2687.63		8.42121	0
2022-07-26 00:28:30	2374.27		8.42121	0
2022-07-26 00:28:35	2685.55		8.42121	0
2022-07-26 00:28:40	3256.96		8.42121	0
2022-07-26 00:28:45	4365.6		8.42121	0
2022-07-26 00:28:50	4476.68		8.42121	0
2022-07-26 00:28:55	5951.98		8.42121	0
2022-07-26 00:29:00	7362.34		8.42121	0
2022-07-26 00:29:05	6991.35		8.42121	0
2022-07-26 00:29:10	7664.45		8.42121	0
2022-07-26 00:29:15	6841.9		8.42121	0
2022-07-26 00:29:20	6650.02		8.42121	0
2022-07-26 00:29:25	6148.06		8.42121	0
2022-07-26 00:29:30	7402.9		8.42121	0
2022-07-26 00:29:35	7885.09		8.42121	0
2022-07-26 00:29:40	7495.24		8.42121	0
2022-07-26 00:29:45	5974.48		8.42121	0
2022-07-26 00:30:00	3345.26		8.42121	0
2022-07-26 00:30:05	3346.37		8.42121	0
2022-07-26 00:30:10	3152.11		8.42121	0
2022-07-26 00:30:15	3511.12		8.42121	0
2022-07-26 00:30:20	4079.65		8.42121	0
2022-07-26 00:30:25	5244.04		8.42121	0
2022-07-26 00:30:30	4929.81		8.42121	0
2022-07-26 00:30:35	5385.2		8.42121	0
2022-07-26 00:30:40	5710.79		8.42121	0
2022-07-26 00:30:45	6145.82		8.42121	0
2022-07-26 00:30:50	6202.36		8.42121	0
2022-07-26 00:30:55	5603.52		8.42121	0
2022-07-26 00:31:00	5817.25		8.42121	0
2022-07-26 00:31:05	5781.72		8.42121	0
2022-07-26 00:31:10	5271.54		8.42121	0
2022-07-26 00:31:15	4986.27		8.42121	0
2022-07-26 00:31:20	4661.95		8.42121	0
2022-07-26 00:31:25	3668.73		8.42121	0
2022-07-26 00:31:30	2877.42		8.42121	0
2022-07-26 00:31:35	2547.2		8.42121	0
2022-07-26 00:31:40	2585.5		8.42121	0
2022-07-26 00:31:45	3855.17		8.42121	0
2022-07-26 00:31:50	5224.09		8.42121	0
2022-07-26 00:31:55	5503.54		8.42121	0
2022-07-26 00:32:00	5210.89		8.42121	0
2022-07-26 00:32:05	4835.9		8.42121	0
2022-07-26 00:32:10	4934.65		8.42121	0
2022-07-26 00:32:15	5358.01		8.42121	0
2022-07-26 00:32:20	4360.07		8.42121	0
2022-07-26 00:32:25	4000.96		8.42121	0
2022-07-26 00:32:30	4104.84		8.42121	0
2022-07-26 00:32:35	4131.23		8.42121	0
2022-07-26 00:32:40	4480.48		8.42121	0
2022-07-26 00:32:45	4656.32		8.42121	0
2022-07-26 00:32:50	4567		8.42121	0
2022-07-26 00:32:55	4331.8		8.42121	0
2022-07-26 00:33:00	3994.64		8.42121	0
2022-07-26 00:33:05	4173.22		8.42121	0
2022-07-26 00:33:10	5201.41		8.42121	0
2022-07-26 00:33:15	6403.7		8.42121	0
2022-07-26 00:33:20	6122.24		8.42121	0
2022-07-26 00:33:25	6020.28		8.42121	0
2022-07-26 00:33:30	5981.15		8.42121	0
2022-07-26 00:33:35	5349.99		8.42121	0
2022-07-26 00:33:40	5724.92		8.42121	0
2022-07-26 00:33:45	5626.76		8.42121	0
2022-07-26 00:33:50	5832.93		8.42121	0
2022-07-26 00:33:55	6563.79		8.42121	0
2022-07-26 00:34:00	8896.8		8.42121	0
2022-07-26 00:34:05	9558.87		8.42121	0
2022-07-26 00:34:10	8961.97		8.42121	0
2022-07-26 00:34:15	7581.25		8.42121	0
2022-07-26 00:34:20	6505.56		8.42121	0
2022-07-26 00:34:25	5141.09		8.42121	0
2022-07-26 00:34:30	3410.79		8.42121	0
2022-07-26 00:34:35	3552.25		8.42121	0
2022-07-26 00:34:40	4323.83		8.42121	0
2022-07-26 00:34:45	5611.69		8.42121	0
2022-07-26 00:34:50	5046.51		8.42121	0
2022-07-26 00:34:55	3813.54		8.42121	0
2022-07-26 00:35:00	3554.95		8.42121	0
2022-07-26 00:35:05	3317.55		8.42121	0
2022-07-26 00:35:10	3081.53		8.42121	0
2022-07-26 00:35:15	3503.7		8.42121	0
2022-07-26 00:35:20	3635.36		8.42121	0
2022-07-26 00:35:25	3967.78		8.42121	0
2022-07-26 00:35:30	4711.83		8.42121	0
2022-07-26 00:35:35	4585.61		8.42121	0
2022-07-26 00:35:40	5335.5		8.42121	0
2022-07-26 00:35:45	5848.8		8.42121	0
2022-07-26 00:35:50	5498.34		8.42121	0
2022-07-26 00:35:55	5352.44		8.42121	0
2022-07-26 00:36:00	5361.04		8.42121	0
2022-07-26 00:36:05	5044.5		8.42121	0
2022-07-26 00:36:10	5455.79		8.42121	0
2022-07-26 00:36:15	5523.15		8.42121	0
2022-07-26 00:36:20	4872.55		8.42121	0
2022-07-26 00:36:25	3748.27		8.42121	0
2022-07-26 00:36:30	3003.77		8.42121	0
2022-07-26 00:36:35	3579.67		8.42121	0
2022-07-26 00:36:40	4072.36		8.42121	0
2022-07-26 00:36:45	4108.31		8.42121	0
2022-07-26 00:36:50	3786.79		8.42121	0
2022-07-26 00:36:55	4299.67		8.42121	0
2022-07-26 00:37:00	4285.92		8.42121	0
2022-07-26 00:37:05	4564.96		8.42121	0
2022-07-26 00:37:10	4739.37		8.42121	0
2022-07-26 00:37:15	4963		8.42121	0
2022-07-26 00:37:20	5177.73		8.42121	0
2022-07-26 00:37:25	5168.28		8.42121	0
2022-07-26 00:37:30	5072.47		8.42121	0
2022-07-26 00:37:35	4848.82		8.42121	0
2022-07-26 00:37:40	4232.53		8.42121	0
2022-07-26 00:37:45	3968.77		8.42121	0
2022-07-26 00:37:50	4110.23		8.42121	0
2022-07-26 00:37:55	5178.28		8.42121	0
2022-07-26 00:38:00	5535.56		8.42121	0
2022-07-26 00:38:05	5128.74		8.42121	0
2022-07-26 00:38:10	5332.85		8.42121	0
2022-07-26 00:38:15	5846.07		8.42121	0
2022-07-26 00:38:20	6386.72		8.42121	0
2022-07-26 00:38:25	6375.15		8.42121	0
2022-07-26 00:38:30	5769.23		8.42121	0
2022-07-26 00:38:35	5888.4		8.42121	0
2022-07-26 00:38:40	6029.69		8.42121	0
2022-07-26 00:38:45	5872.71		8.42121	0
2022-07-26 00:38:50	5791.34		8.42121	0
2022-07-26 00:38:55	5892.65		8.42121	0
2022-07-26 00:39:00	6649.73		8.42121	0
2022-07-26 00:39:05	6659.75		8.42121	0
2022-07-26 00:39:10	8060.09		8.42121	0
2022-07-26 00:39:15	8605.91		8.42121	0
2022-07-26 00:39:20	8053.58		8.42121	0
2022-07-26 00:39:25	7881.84		8.42121	0
2022-07-26 00:39:30	7940.5		8.42121	0
2022-07-26 00:39:35	7505.48		8.42121	0
2022-07-26 00:39:40	6986.89		8.42121	0
2022-07-26 00:39:45	7186.73		8.42121	0
2022-07-26 00:39:50	7607.12		8.42121	0
2022-07-26 00:39:55	8023.03		8.42121	0
2022-07-26 00:40:00	7761.16		8.42121	0
2022-07-26 00:40:05	7108.3		8.42121	0
2022-07-26 00:40:10	6537.12		8.42121	0
2022-07-26 00:40:15	6522.14		8.42121	0
2022-07-26 00:40:20	6152.02		8.42121	0
2022-07-26 00:40:25	6906.04		8.42121	0
2022-07-26 00:40:30	6915.24		8.42121	0
2022-07-26 00:40:35	6260.69		8.42121	0
2022-07-26 00:40:40	5544.17		8.42121	0
2022-07-26 00:40:45	4684.27		8.42121	0
2022-07-26 00:40:50	4306.34		8.42121	0
2022-07-26 00:40:55	3882.51		8.42121	0
2022-07-26 00:41:00	3405.23		8.42121	0
2022-07-26 00:41:05	3394.29		8.42121	0
2022-07-26 00:41:10	3694.1		8.42121	0
2022-07-26 00:41:15	3715.84		8.42121	0
2022-07-26 00:41:20	3463.65		8.42121	0
2022-07-26 00:41:25	3185.3		8.42121	0
2022-07-26 00:41:30	2932.44		8.42121	0
2022-07-26 00:41:35	2822.98		8.42121	0
2022-07-26 00:41:40	2482.4		8.42121	0
2022-07-26 00:41:45	2198.7		8.42121	0
2022-07-26 00:41:50	2600.66		8.42121	0
2022-07-26 00:41:55	4255.07		8.42121	0
2022-07-26 00:42:00	6922.43		8.42121	0
2022-07-26 00:42:05	7974.49		8.42121	0
2022-07-26 00:42:10	8234.41		8.42121	0
2022-07-26 00:42:15	8030.92		8.42121	0
2022-07-26 00:42:20	8577.44		8.42121	0
2022-07-26 00:42:25	8995.06		8.42121	0
2022-07-26 00:42:30	8698.98		8.42121	0
2022-07-26 00:42:35	7864.64		8.42121	0
2022-07-26 00:42:40	7065.06		8.42121	0
2022-07-26 00:42:45	6115.72		8.42121	0
2022-07-26 00:42:50	5144.92		8.42121	0
2022-07-26 00:42:55	4532.6		8.42121	0
2022-07-26 00:43:00	5235.54		8.42121	0
2022-07-26 00:43:05	6343.24		8.42121	0
2022-07-26 00:43:10	7329.35		8.42121	0
2022-07-26 00:43:15	8504.22		8.42121	0
2022-07-26 00:43:20	9404.39		8.42121	0
2022-07-26 00:43:25	10090.7		8.42121	0
2022-07-26 00:43:30	10039.8		8.42121	0
2022-07-26 00:43:35	8986.73		8.42121	0
2022-07-26 00:43:40	8149.99		8.42121	0
2022-07-26 00:43:45	7076.93		8.42121	0
2022-07-26 00:43:50	6217.04		8.42121	0
2022-07-26 00:43:55	5934.14		8.42121	0
2022-07-26 00:44:00	6116.32		8.42121	0
2022-07-26 00:44:05	6708.93		8.42121	0
2022-07-26 00:44:10	6709.36		8.42121	0
2022-07-26 00:44:15	6537.83		8.42121	0
2022-07-26 00:44:20	5824.08		8.42121	0
2022-07-26 00:44:25	4954.01		8.42121	0
2022-07-26 00:44:30	5210.22		8.42121	0
2022-07-26 00:44:35	5765.96		8.42121	0
2022-07-26 00:44:40	6230.39		8.42121	0
2022-07-26 00:44:45	5194.79		8.42121	0
2022-07-26 00:44:50	4893		8.42121	0
2022-07-26 00:44:55	5075.56		8.42121	0
2022-07-26 00:45:00	5681.88		8.42121	0
2022-07-26 00:45:05	6650.38		8.42121	0
2022-07-26 00:45:10	7416.42		8.42121	0
2022-07-26 00:45:15	7656.98		8.42121	0
2022-07-26 00:45:20	7937.04		8.42121	0
2022-07-26 00:45:25	7598.06		8.42121	0
2022-07-26 00:45:30	7716.52		8.42121	0
2022-07-26 00:45:35	8273.39		8.42121	0
2022-07-26 00:45:40	8231.77		8.42121	0
2022-07-26 00:45:45	7685.07		8.42121	0
2022-07-26 00:45:50	6732.26		8.42121	0
2022-07-26 00:45:55	5965.04		8.42121	0
2022-07-26 00:46:00	5557.8		8.42121	0
2022-07-26 00:46:05	5328.55		8.42121	0
2022-07-26 00:46:10	5248.02		8.42121	0
2022-07-26 00:46:15	4715.26		8.42121	0
2022-07-26 00:46:20	4785.77		8.42121	0
2022-07-26 00:46:25	5211.38		8.42121	0
2022-07-26 00:46:30	5952.51		8.42121	0
2022-07-26 00:46:35	6487.31		8.42121	0
2022-07-26 00:46:40	7121.23		8.42121	0
2022-07-26 00:46:45	6792.5		8.42121	0
2022-07-26 00:46:50	6947.75		8.42121	0
2022-07-26 00:46:55	7310.71		8.42121	0
2022-07-26 00:47:00	7579.83		8.42121	0
2022-07-26 00:47:05	7687.79		8.42121	0
2022-07-26 00:47:10	6963.64		8.42121	0
2022-07-26 00:47:15	6598.67		8.42121	0
2022-07-26 00:47:20	6616.46		8.42121	0
2022-07-26 00:47:25	6489.05		8.42121	0
2022-07-26 00:47:30	6742.77		8.42121	0
2022-07-26 00:47:35	7103.13		8.42121	0
2022-07-26 00:47:40	8181.77		8.42121	0
2022-07-26 00:47:45	8322.66		8.42121	0
2022-07-26 00:47:50	8667.5		8.42121	0
2022-07-26 00:47:55	8137.82		8.42121	0
2022-07-26 00:48:00	7504.52		8.42121	0
2022-07-26 00:48:05	7315.43		8.42121	0
2022-07-26 00:48:10	7519.19		8.42121	0
2022-07-26 00:48:15	8114.99		8.42121	0
2022-07-26 00:48:20	8195.23		8.42121	0
2022-07-26 00:48:25	8236.54		8.42121	0
2022-07-26 00:48:30	8314.28		8.42121	0
2022-07-26 00:48:35	8090.4		8.42121	0
2022-07-26 00:48:40	8040.54		8.42121	0
2022-07-26 00:48:45	7425.53		8.42121	0
2022-07-26 00:48:50	6277.49		8.42121	0
2022-07-26 00:48:55	6923.7		8.42121	0
2022-07-26 00:49:00	7049.62		8.42121	0
2022-07-26 00:49:05	6964.03		8.42121	0
2022-07-26 00:49:10	8093.16		8.42121	0
2022-07-26 00:49:15	8774.58		8.42121	0
2022-07-26 00:49:20	8763.35		8.42121	0
2022-07-26 00:49:25	8761.75		8.42121	0
2022-07-26 00:49:30	9312.05		8.42121	0
2022-07-26 00:49:35	9638.96		8.42121	0
2022-07-26 00:49:40	9756.15		8.42121	0
2022-07-26 00:49:45	9460.54		8.42121	0
2022-07-26 00:49:50	8888.96		8.42121	0
2022-07-26 00:49:55	8183.33		8.42121	0
2022-07-26 00:50:00	7670.07		8.42121	0
2022-07-26 00:50:05	6537.5		8.42121	0
2022-07-26 00:50:10	5551.3		8.42121	0
2022-07-26 00:50:15	5264.79		8.42121	0
2022-07-26 00:50:20	5159.58		8.42121	0
2022-07-26 00:50:25	5161.75		8.42121	0
2022-07-26 00:50:30	4774.9		8.42121	0
2022-07-26 00:50:35	4826.6		8.42121	0
2022-07-26 00:50:40	5011.9		8.42121	0
2022-07-26 00:50:45	5498.33		8.42121	0
2022-07-26 00:50:50	5805.67		8.42121	0
2022-07-26 00:50:55	5518.55		8.42121	0
2022-07-26 00:51:00	6036.81		8.42121	0
2022-07-26 00:51:05	5789.8		8.42121	0
2022-07-26 00:51:10	5913.85		8.42121	0
2022-07-26 00:51:15	5817.5		8.42121	0
2022-07-26 00:51:20	6383.46		8.42121	0
2022-07-26 00:51:25	6488.63		8.42121	0
2022-07-26 00:51:30	6217.69		8.42121	0
2022-07-26 00:51:35	6473.18		8.42121	0
2022-07-26 00:51:40	7017.45		8.42121	0
2022-07-26 00:51:45	6706.33		8.42121	0
2022-07-26 00:51:50	6329.83		8.42121	0
2022-07-26 00:51:55	6326.21		8.42121	0
2022-07-26 00:52:00	6128.6		8.42121	0
2022-07-26 00:52:05	6417.43		8.42121	0
2022-07-26 00:52:10	6337.24		8.42121	0
2022-07-26 00:52:15	6994.19		8.42121	0
2022-07-26 00:52:20	7340.31		8.42121	0
2022-07-26 00:52:25	7748.81		8.42121	0
2022-07-26 00:52:30	7463.25		8.42121	0
2022-07-26 00:52:35	6693.19		8.42121	0
2022-07-26 00:52:40	6450.28		8.42121	0
2022-07-26 00:52:45	6246.26		8.42121	0
2022-07-26 00:52:50	5909.56		8.42121	0
2022-07-26 00:52:55	5421.58		8.42121	0
2022-07-26 00:53:00	5778.67		8.42121	0
2022-07-26 00:53:05	6355.74		8.42121	0
2022-07-26 00:53:10	7952.95		8.42121	0
2022-07-26 00:53:15	8509.88		8.42121	0
2022-07-26 00:53:20	7974.7		8.42121	0
2022-07-26 00:53:25	7660.47		8.42121	0
2022-07-26 00:53:30	7546.62		8.42121	0
2022-07-26 00:53:35	7311.65		8.42121	0
2022-07-26 00:53:40	6576.08		8.42121	0
2022-07-26 00:53:45	6247.39		8.42121	0
2022-07-26 00:53:50	6840.23		8.42121	0
2022-07-26 00:53:55	6323.57		8.42121	0
2022-07-26 00:54:00	7099.49		8.42121	0
2022-07-26 00:54:05	7276.76		8.42121	0
2022-07-26 00:54:10	7917.92		8.42121	0
2022-07-26 00:54:15	7734.51		8.42121	0
2022-07-26 00:54:20	8592.96		8.42121	0
2022-07-26 00:54:25	8805.03		8.42121	0
2022-07-26 00:54:30	9040.57		8.42121	0
2022-07-26 00:54:35	7331.83		8.42121	0
2022-07-26 00:54:40	5821.82		8.42121	0
2022-07-26 00:54:45	3916.42		8.42121	0
2022-07-26 00:54:50	2661.37		8.42121	0
2022-07-26 00:54:55	2681.42		8.42121	0
2022-07-26 00:55:00	2715.4		8.42121	0
2022-07-26 00:55:05	3014.74		8.42121	0
2022-07-26 00:55:10	3363.19		8.42121	0
2022-07-26 00:55:15	3885.7		8.42121	0
2022-07-26 00:55:20	4129.73		8.42121	0
2022-07-26 00:55:25	4370.96		8.42121	0
2022-07-26 00:55:30	4299.79		8.42121	0
2022-07-26 00:55:35	4436.1		8.42121	0
2022-07-26 00:55:40	4688.68		8.42121	0
2022-07-26 00:55:45	4007.21		8.42121	0
2022-07-26 00:55:50	3337.73		8.42121	0
2022-07-26 00:55:55	3814.34		8.42121	0
2022-07-26 00:56:00	5477.58		8.42121	0
2022-07-26 00:56:05	6452.01		8.42121	0
2022-07-26 00:56:10	6181.69		8.42121	0
2022-07-26 00:56:15	5217.43		8.42121	0
2022-07-26 00:56:20	5138.54		8.42121	0
2022-07-26 00:56:25	5673.32		8.42121	0
2022-07-26 00:56:30	6254.93		8.42121	0
2022-07-26 00:56:35	5481.46		8.42121	0
2022-07-26 00:56:40	4645		8.42121	0
2022-07-26 00:56:45	4298.14		8.42121	0
2022-07-26 00:56:50	4162.09		8.42121	0
2022-07-26 00:56:55	4141.88		8.42121	0
2022-07-26 00:57:00	3640.85		8.42121	0
2022-07-26 00:57:05	3532.19		8.42121	0
2022-07-26 00:57:10	3199.2		8.42121	0
2022-07-26 00:57:15	3681.8		8.42121	0
2022-07-26 00:57:20	4170.84		8.42121	0
2022-07-26 00:57:25	4168.44		8.42121	0
2022-07-26 00:57:30	4266.6		8.42121	0
2022-07-26 00:57:35	4213.25		8.42121	0
2022-07-26 00:57:40	3755.33		8.42121	0
2022-07-26 00:57:45	3467.49		8.42121	0
2022-07-26 00:57:50	3812.04		8.42121	0
2022-07-26 00:57:55	4322.28		8.42121	0
2022-07-26 00:58:00	4639.36		8.42121	0
2022-07-26 00:58:05	5353.13		8.42121	0
2022-07-26 00:58:10	6151.76		8.42121	0
2022-07-26 00:58:15	6436.65		8.42121	0
2022-07-26 00:58:20	6638.85		8.42121	0
2022-07-26 00:58:25	6768.08		8.42121	0
2022-07-26 00:58:30	6624.22		8.42121	0
2022-07-26 00:58:35	5925.02		8.42121	0
2022-07-26 00:58:40	6088.22		8.42121	0
2022-07-26 00:58:45	7225.53		8.42121	0
2022-07-26 00:58:50	8394.45		8.42121	0
2022-07-26 00:58:55	8344.2		8.42121	0
2022-07-26 00:59:00	7197.9		8.42121	0
2022-07-26 00:59:05	6606.44		8.42121	0
2022-07-26 00:59:10	5349.65		8.42121	0
2022-07-26 00:59:15	4612.3		8.42121	0
2022-07-26 00:59:20	4767.39		8.42121	0
2022-07-26 00:59:25	4327.76		8.42121	0
2022-07-26 00:59:30	4161.47		8.42121	0
2022-07-26 00:59:35	4167.46		8.42121	0
2022-07-26 00:59:40	4309.19		8.42121	0
2022-07-26 00:59:45	3946.33		8.42121	0
2022-07-26 00:59:50	4089.64		8.42121	0
2022-07-26 00:59:55	4060.85		8.42121	0
2022-07-26 01:00:05	5046.09		7.51081	0
2022-07-26 01:00:10	5632.83		7.51081	0
2022-07-26 01:00:15	6481.51		7.51081	0
2022-07-26 01:00:20	7261.4		7.51081	0
2022-07-26 01:00:25	7994.31		7.51081	0
2022-07-26 01:00:30	7728.22		7.51081	0
2022-07-26 01:00:35	7268.14		7.51081	0
2022-07-26 01:00:40	6356.58		7.51081	0
2022-07-26 01:00:45	5534.64		7.51081	0
2022-07-26 01:00:50	4936.53		7.51081	0
2022-07-26 01:00:55	4415.47		7.51081	0
2022-07-26 01:01:00	4772.31		7.51081	0
2022-07-26 01:01:05	5345.25		7.51081	0
2022-07-26 01:01:10	5352.71		7.51081	0
2022-07-26 01:01:15	4315.66		7.51081	0
2022-07-26 01:01:20	4106.33		7.51081	0
2022-07-26 01:01:25	4306.22		7.51081	0
2022-07-26 01:01:30	4938.53		7.51081	0
2022-07-26 01:01:35	5904.71		7.51081	0
2022-07-26 01:01:40	5123.17		7.51081	0
2022-07-26 01:01:45	4333.23		7.51081	0
2022-07-26 01:01:50	3663.1		7.51081	0
2022-07-26 01:01:55	2899.24		7.51081	0
2022-07-26 01:02:00	3374.91		7.51081	0
2022-07-26 01:02:05	4556.76		7.51081	0
2022-07-26 01:02:10	5620.6		7.51081	0
2022-07-26 01:02:15	5700.44		7.51081	0
2022-07-26 01:02:20	5029.24		7.51081	0
2022-07-26 01:02:25	5075.41		7.51081	0
2022-07-26 01:02:30	4524.38		7.51081	0
2022-07-26 01:02:35	3605.23		7.51081	0
2022-07-26 01:02:40	3261.49		7.51081	0
2022-07-26 01:02:45	3170.47		7.51081	0
2022-07-26 01:02:50	3560.58		7.51081	0
2022-07-26 01:02:55	3834.69		7.51081	0
2022-07-26 01:03:00	3660.48		7.51081	0
2022-07-26 01:03:05	3735.14		7.51081	0
2022-07-26 01:03:10	4891.91		7.51081	0
2022-07-26 01:03:15	5889.25		7.51081	0
2022-07-26 01:03:20	6695.56		7.51081	0
2022-07-26 01:03:25	7380.02		7.51081	0
2022-07-26 01:03:30	7772.53		7.51081	0
2022-07-26 01:03:35	7260.35		7.51081	0
2022-07-26 01:03:40	7329.2		7.51081	0
2022-07-26 01:03:45	7425.46		7.51081	0
2022-07-26 01:03:50	7572.48		7.51081	0
2022-07-26 01:03:55	8166.58		7.51081	0
2022-07-26 01:04:00	8524.13		7.51081	0
2022-07-26 01:04:05	8795.4		7.51081	0
2022-07-26 01:04:10	9022.84		7.51081	0
2022-07-26 01:04:15	9602.94		7.51081	0
2022-07-26 01:04:20	9786.08		7.51081	0
2022-07-26 01:04:25	9596.3		7.51081	0
2022-07-26 01:04:30	9072.84		7.51081	0
2022-07-26 01:04:35	9495.25		7.51081	0
2022-07-26 01:04:40	9563.06		7.51081	0
2022-07-26 01:04:45	9260.05		7.51081	0
2022-07-26 01:04:50	7596.1		7.51081	0
2022-07-26 01:04:55	5922.29		7.51081	0
2022-07-26 01:05:00	4354.47		7.51081	0
2022-07-26 01:05:05	3621.89		7.51081	0
2022-07-26 01:05:10	3835.94		7.51081	0
2022-07-26 01:05:15	4274.1		7.51081	0
2022-07-26 01:05:20	5348.33		7.51081	0
2022-07-26 01:05:25	5590.14		7.51081	0
2022-07-26 01:05:30	5937.75		7.51081	0
2022-07-26 01:05:35	5220.61		7.51081	0
2022-07-26 01:05:40	4272.7		7.51081	0
2022-07-26 01:05:45	4439.72		7.51081	0
2022-07-26 01:05:50	4755.44		7.51081	0
2022-07-26 01:05:55	4751.29		7.51081	0
2022-07-26 01:06:00	4737.13		7.51081	0
2022-07-26 01:06:05	4599.61		7.51081	0
2022-07-26 01:06:10	4874.93		7.51081	0
2022-07-26 01:06:15	4827.76		7.51081	0
2022-07-26 01:06:20	4887.55		7.51081	0
2022-07-26 01:06:25	4814.74		7.51081	0
2022-07-26 01:06:30	4797.26		7.51081	0
2022-07-26 01:06:35	3924.85		7.51081	0
2022-07-26 01:06:40	3239.02		7.51081	0
2022-07-26 01:06:45	3616.87		7.51081	0
2022-07-26 01:06:50	3990.87		7.51081	0
2022-07-26 01:06:55	3906.21		7.51081	0
2022-07-26 01:07:00	3512.72		7.51081	0
2022-07-26 01:07:05	4033.61		7.51081	0
2022-07-26 01:07:10	4495.49		7.51081	0
2022-07-26 01:07:15	4332.66		7.51081	0
2022-07-26 01:07:20	4272.39		7.51081	0
2022-07-26 01:07:25	4739.12		7.51081	0
2022-07-26 01:07:30	4880.67		7.51081	0
2022-07-26 01:07:35	4715.62		7.51081	0
2022-07-26 01:07:40	3932.42		7.51081	0
2022-07-26 01:07:45	3619.91		7.51081	0
2022-07-26 01:07:50	3440		7.51081	0
2022-07-26 01:07:55	3535.16		7.51081	0
2022-07-26 01:08:00	3464.68		7.51081	0
2022-07-26 01:08:05	4045.8		7.51081	0
2022-07-26 01:08:10	3626.87		7.51081	0
2022-07-26 01:08:15	3412.82		7.51081	0
2022-07-26 01:08:20	3022.7		7.51081	0
2022-07-26 01:08:25	2738.51		7.51081	0
2022-07-26 01:08:30	2522.27		7.51081	0
2022-07-26 01:08:35	2681.05		7.51081	0
2022-07-26 01:08:40	3200.05		7.51081	0
2022-07-26 01:08:45	3715.64		7.51081	0
2022-07-26 01:08:50	4172.75		7.51081	0
2022-07-26 01:08:55	3992.38		7.51081	0
2022-07-26 01:09:00	3746.53		7.51081	0
2022-07-26 01:09:05	3065.15		7.51081	0
2022-07-26 01:09:10	2639.07		7.51081	0
2022-07-26 01:09:15	2609.5		7.51081	0
2022-07-26 01:09:20	3070.13		7.51081	0
2022-07-26 01:09:25	3620.94		7.51081	0
2022-07-26 01:09:30	3649.26		7.51081	0
2022-07-26 01:09:35	4070.37		7.51081	0
2022-07-26 01:09:40	4495.89		7.51081	0
2022-07-26 01:09:45	4675.73		7.51081	0
2022-07-26 01:09:50	4613.76		7.51081	0
2022-07-26 01:09:55	4220.79		7.51081	0
2022-07-26 01:10:00	3975.15		7.51081	0
2022-07-26 01:10:05	2106.93		7.51081	0
2022-07-26 01:10:10	3311.65		7.51081	0
2022-07-26 01:10:15	3495.06		7.51081	0
2022-07-26 01:10:20	3959.4		7.51081	0
2022-07-26 01:10:25	4078.88		7.51081	0
2022-07-26 01:10:30	4751.96		7.51081	0
2022-07-26 01:10:35	5654.65		7.51081	0
2022-07-26 01:10:40	5702.77		7.51081	0
2022-07-26 01:10:45	5229.74		7.51081	0
2022-07-26 01:10:50	4522.2		7.51081	0
2022-07-26 01:10:55	3351.63		7.51081	0
2022-07-26 01:11:00	2500.16		7.51081	0
2022-07-26 01:11:05	1659.3		7.51081	0
2022-07-26 01:11:10	1598.13		7.51081	0
2022-07-26 01:11:15	1508.93		7.51081	0
2022-07-26 01:11:20	1249.35		7.51081	0
2022-07-26 01:11:25	1326.95		7.51081	0
2022-07-26 01:11:30	1749.68		7.51081	0
2022-07-26 01:11:35	2300.76		7.51081	0
2022-07-26 01:11:40	2623.3		7.51081	0
2022-07-26 01:11:45	3001.29		7.51081	0
2022-07-26 01:11:50	3206.27		7.51081	0
2022-07-26 01:11:55	3556.35		7.51081	0
2022-07-26 01:12:00	3484.34		7.51081	0
2022-07-26 01:12:05	3467.92		7.51081	0
2022-07-26 01:12:10	3778.68		7.51081	0
2022-07-26 01:12:15	4734.76		7.51081	0
2022-07-26 01:12:20	5215.04		7.51081	0
2022-07-26 01:12:25	6279.41		7.51081	0
2022-07-26 01:12:30	7390.43		7.51081	0
2022-07-26 01:12:35	7659.63		7.51081	0
2022-07-26 01:12:40	8028.19		7.51081	0
2022-07-26 01:12:45	8278.57		7.51081	0
2022-07-26 01:12:50	7984.37		7.51081	0
2022-07-26 01:12:55	7897.51		7.51081	0
2022-07-26 01:13:00	7717.84		7.51081	0
2022-07-26 01:13:05	6782.3		7.51081	0
2022-07-26 01:13:10	5352.65		7.51081	0
2022-07-26 01:13:15	4765.28		7.51081	0
2022-07-26 01:13:20	4853.38		7.51081	0
2022-07-26 01:13:25	5064.26		7.51081	0
2022-07-26 01:13:30	5163.29		7.51081	0
2022-07-26 01:13:35	5749.6		7.51081	0
2022-07-26 01:13:40	6362.73		7.51081	0
2022-07-26 01:13:45	6266.93		7.51081	0
2022-07-26 01:13:50	5976.66		7.51081	0
2022-07-26 01:13:55	5838.54		7.51081	0
2022-07-26 01:14:00	5727.29		7.51081	0
2022-07-26 01:14:05	5237.91		7.51081	0
2022-07-26 01:14:10	4495.54		7.51081	0
2022-07-26 01:14:15	3626.89		7.51081	0
2022-07-26 01:14:20	3651.73		7.51081	0
2022-07-26 01:14:25	3401.44		7.51081	0
2022-07-26 01:14:30	2743.74		7.51081	0
2022-07-26 01:14:35	2380.24		7.51081	0
2022-07-26 01:14:40	2637.56		7.51081	0
2022-07-26 01:14:45	3084.69		7.51081	0
2022-07-26 01:14:50	3512.92		7.51081	0
2022-07-26 01:14:55	3889.28		7.51081	0
2022-07-26 01:15:00	3519.04		7.51081	0
2022-07-26 01:15:05	3395.57		7.51081	0
2022-07-26 01:15:10	4145.14		7.51081	0
2022-07-26 01:15:15	4849.58		7.51081	0
2022-07-26 01:15:20	6652.74		7.51081	0
2022-07-26 01:15:25	8307.81		7.51081	0
2022-07-26 01:15:30	8461.09		7.51081	0
2022-07-26 01:15:35	8627.28		7.51081	0
2022-07-26 01:15:40	8273.58		7.51081	0
2022-07-26 01:15:45	6602.98		7.51081	0
2022-07-26 01:15:50	5172.39		7.51081	0
2022-07-26 01:15:55	4792.3		7.51081	0
2022-07-26 01:16:00	4574.17		7.51081	0
2022-07-26 01:16:05	4256.72		7.51081	0
2022-07-26 01:16:10	4475.58		7.51081	0
2022-07-26 01:16:15	3860.44		7.51081	0
2022-07-26 01:16:20	3929.32		7.51081	0
2022-07-26 01:16:25	4314.79		7.51081	0
2022-07-26 01:16:30	4656.19		7.51081	0
2022-07-26 01:16:35	4366.64		7.51081	0
2022-07-26 01:16:40	4030.05		7.51081	0
2022-07-26 01:16:45	4167.25		7.51081	0
2022-07-26 01:16:50	5009.82		7.51081	0
2022-07-26 01:16:55	5235.7		7.51081	0
2022-07-26 01:17:00	4665.35		7.51081	0
2022-07-26 01:17:05	3805.55		7.51081	0
2022-07-26 01:17:10	3960.21		7.51081	0
2022-07-26 01:17:15	3143.75		7.51081	0
2022-07-26 01:17:20	2088.33		7.51081	0
2022-07-26 01:17:25	1838.24		7.51081	0
2022-07-26 01:17:30	1635.57		7.51081	0
2022-07-26 01:17:35	1667.41		7.51081	0
2022-07-26 01:17:40	1980.1		7.51081	0
2022-07-26 01:17:45	2185.73		7.51081	0
2022-07-26 01:17:50	2132.28		7.51081	0
2022-07-26 01:17:55	2211.5		7.51081	0
2022-07-26 01:18:00	2198.75		7.51081	0
2022-07-26 01:18:05	2736.95		7.51081	0
2022-07-26 01:18:10	3830.48		7.51081	0
2022-07-26 01:18:15	5217.68		7.51081	0
2022-07-26 01:18:20	5488.77		7.51081	0
2022-07-26 01:18:25	4805.82		7.51081	0
2022-07-26 01:18:30	4276.8		7.51081	0
2022-07-26 01:18:35	4512.18		7.51081	0
2022-07-26 01:18:40	4459.23		7.51081	0
[truncated: 495 more rows]
